# Supplementary material
Source: publisher figshare collection journal article supplement (https://acs.figshare.com/ndownloader/files/10481755)
Supplement: Supplementary file 1 [file 10481755]

data_14
_audit_creation_date              2017-06-07
_audit_creation_method
;
Olex2 1.2
(compiled 2014.09.19 svn.r3010 for OlexSys, GUI svn.r4874)
;
_publ_contact_author_address      ?
_publ_contact_author_email        ?
_publ_contact_author_name         ''
_publ_contact_author_phone        ?
_publ_section_references
;
Dolomanov, O.V., Bourhis, L.J., Gildea, R.J, Howard, J.A.K. & Puschmann, H.
 (2009), J. Appl. Cryst. 42, 339-341.

Sheldrick, G.M. (2008). Acta Cryst. A64, 112-122.
;
_chemical_name_common             ?
_chemical_name_systematic         ?
_chemical_formula_moiety          'C32 H32 Cl2 N4 O8 Pb2, 2(Cl)'
_chemical_formula_sum             'C32 H32 Cl4 N4 O8 Pb2'
_chemical_formula_weight          1156.79
_chemical_melting_point           ?
loop_
  _atom_type_symbol
  _atom_type_description
  _atom_type_scat_dispersion_real
  _atom_type_scat_dispersion_imag
  _atom_type_scat_source
 'C' 'C' 0.0033 0.0016 'International Tables Vol C Tables 4.2.6.8 and 6.1.1.4'
 'H' 'H' 0.0000 0.0000 'International Tables Vol C Tables 4.2.6.8 and 6.1.1.4'
 'Cl' 'Cl' 0.1484 0.1585 'International Tables Vol C Tables 4.2.6.8 and 6.1.1.4'
 'N' 'N' 0.0061 0.0033 'International Tables Vol C Tables 4.2.6.8 and 6.1.1.4'
 'O' 'O' 0.0106 0.0060 'International Tables Vol C Tables 4.2.6.8 and 6.1.1.4'
 'Pb' 'Pb' -3.3944 10.1111
 'International Tables Vol C Tables 4.2.6.8 and 6.1.1.4'

_shelx_space_group_comment
;
The symmetry employed for this shelxl refinement is uniquely defined
by the following loop, which should always be used as a source of
symmetry information in preference to the above space-group names.
They are only intended as comments.
;
_space_group_crystal_system       'monoclinic'
_space_group_IT_number            14
_space_group_name_H-M_alt         'P 1 21/c 1'
_space_group_name_Hall            '-P 2ybc'
loop_
  _space_group_symop_operation_xyz
 'x, y, z'
 '-x, y+1/2, -z+1/2'
 '-x, -y, -z'
 'x, -y-1/2, z-1/2'

_cell_length_a                    13.4033(14)
_cell_length_b                    7.6867(4)
_cell_length_c                    17.4828(14)
_cell_angle_alpha                 90
_cell_angle_beta                  92.257(9)
_cell_angle_gamma                 90
_cell_volume                      1799.8(3)
_cell_formula_units_Z             2
_cell_measurement_reflns_used     ?
_cell_measurement_temperature     293(2)
_cell_measurement_theta_max       ?
_cell_measurement_theta_min       ?
_shelx_estimated_absorpt_T_max    ?
_shelx_estimated_absorpt_T_min    ?
_exptl_absorpt_coefficient_mu     9.694
_exptl_absorpt_correction_T_max   ?
_exptl_absorpt_correction_T_min   ?
_exptl_absorpt_correction_type    'none'
_exptl_absorpt_process_details    ?
_exptl_absorpt_special_details    ?
_exptl_crystal_colour             ?
_exptl_crystal_density_diffrn     2.135
_exptl_crystal_density_meas       ?
_exptl_crystal_density_method     ?
_exptl_crystal_description        ?
_exptl_crystal_F_000              1096
_exptl_crystal_size_max           ?
_exptl_crystal_size_mid           ?
_exptl_crystal_size_min           ?
_exptl_transmission_factor_max    ?
_exptl_transmission_factor_min    ?
_diffrn_reflns_av_R_equivalents   0.1934
_diffrn_reflns_av_unetI/netI      0.1457
_diffrn_reflns_Laue_measured_fraction_full 0.998
_diffrn_reflns_Laue_measured_fraction_max 0.998
_diffrn_reflns_limit_h_max        16
_diffrn_reflns_limit_h_min        -16
_diffrn_reflns_limit_k_max        9
_diffrn_reflns_limit_k_min        -9
_diffrn_reflns_limit_l_max        21
_diffrn_reflns_limit_l_min        -21
_diffrn_reflns_number             16405
_diffrn_reflns_point_group_measured_fraction_full 0.998
_diffrn_reflns_point_group_measured_fraction_max 0.998
_diffrn_reflns_theta_full         25.242
_diffrn_reflns_theta_max          25.679
_diffrn_reflns_theta_min          2.733
_diffrn_ambient_temperature       293.15
_diffrn_detector_area_resol_mean  ?
_diffrn_measured_fraction_theta_full 0.998
_diffrn_measured_fraction_theta_max 0.998
_diffrn_measurement_device_type   'multiwire proportional'
_diffrn_measurement_method        'phi and omega scans'
_diffrn_radiation_monochromator   'graphite'
_diffrn_radiation_type            MoK\a
_diffrn_radiation_wavelength      0.71073
_diffrn_source                    ?
_reflns_Friedel_coverage          0.000
_reflns_Friedel_fraction_full     .
_reflns_Friedel_fraction_max      .
_reflns_number_gt                 2400
_reflns_number_total              3412
_reflns_special_details
;
 Reflections were merged by SHELXL according to the crystal
 class for the calculation of statistics and refinement.
 
 _reflns_Friedel_fraction is defined as the number of unique
 Friedel pairs measured divided by the number that would be
 possible theoretically, ignoring centric projections and
 systematic absences.
;
_reflns_threshold_expression      'I > 2\s(I)'
_computing_cell_refinement        ?
_computing_data_collection        ?
_computing_data_reduction         ?
_computing_molecular_graphics     'Olex2 (Dolomanov et al., 2009)'
_computing_publication_material   'Olex2 (Dolomanov et al., 2009)'
_computing_structure_refinement   'ShelXL (Sheldrick, 2008)'
_computing_structure_solution     ?
_refine_diff_density_max          6.607
_refine_diff_density_min          -2.427
_refine_diff_density_rms          0.397
_refine_ls_extinction_coef        .
_refine_ls_extinction_method      none
_refine_ls_goodness_of_fit_ref    1.049
_refine_ls_hydrogen_treatment     constr
_refine_ls_matrix_type            full
_refine_ls_number_parameters      226
_refine_ls_number_reflns          3412
_refine_ls_number_restraints      0
_refine_ls_R_factor_all           0.1103
_refine_ls_R_factor_gt            0.0768
_refine_ls_restrained_S_all       1.049
_refine_ls_shift/su_max           0.000
_refine_ls_shift/su_mean          0.000
_refine_ls_structure_factor_coef  Fsqd
_refine_ls_weighting_details
'w=1/[\s^2^(Fo^2^)+(0.0924P)^2^] where P=(Fo^2^+2Fc^2^)/3'
_refine_ls_weighting_scheme       calc
_refine_ls_wR_factor_gt           0.1780
_refine_ls_wR_factor_ref          0.2071
_refine_special_details           ?
_olex2_refinement_description
;
1. Fixed Uiso
 At 1.2 times of:
  All C(H) groups, All C(H,H) groups
2.a Secondary CH2 refined with riding coordinates:
 C6(H6A,H6B), C20(H20A,H20B), C26(H26A,H26B), C34(H34A,H34B)
2.b Aromatic/amide H refined with riding coordinates:
 C11(H11), C29(H29), C31(H31), C32(H32), C33(H33), C53(H53), C58(H58), C4(H4)
;
_atom_sites_solution_hydrogens    geom
_atom_sites_solution_primary      ?
_atom_sites_solution_secondary    ?
loop_
  _atom_site_label
  _atom_site_type_symbol
  _atom_site_fract_x
  _atom_site_fract_y
  _atom_site_fract_z
  _atom_site_U_iso_or_equiv
  _atom_site_adp_type
  _atom_site_occupancy
  _atom_site_site_symmetry_order
  _atom_site_calc_flag
  _atom_site_refinement_flags_posn
  _atom_site_refinement_flags_adp
  _atom_site_refinement_flags_occupancy
  _atom_site_disorder_assembly
  _atom_site_disorder_group
 Pb1 Pb -0.01728(4) -0.46714(7) -0.28244(3) 0.0350(3) Uani 1 1 d . . . . .
 Cl7 Cl -0.0579(3) -0.3148(5) -0.1409(2) 0.0479(10) Uani 1 1 d . . . . .
 O1 O -0.1905(8) -0.5477(14) -0.3036(7) 0.050(3) Uani 1 1 d . . . . .
 O2 O -0.1006(8) -0.1922(12) -0.3222(5) 0.041(3) Uani 1 1 d . . . . .
 O4 O -0.0473(8) -0.3443(13) -0.4203(5) 0.046(3) Uani 1 1 d . . . . .
 O17 O -0.1531(8) -0.7531(15) -0.2152(7) 0.055(3) Uani 1 1 d . . . . .
 N7 N -0.2222(9) 0.2008(15) -0.4622(7) 0.034(3) Uani 1 1 d . . . . .
 N12 N -0.3648(9) -0.3764(15) -0.2112(6) 0.031(3) Uani 1 1 d . . . . .
 C6 C -0.1418(12) -0.087(2) -0.4492(10) 0.043(4) Uani 1 1 d . . . . .
 H6A H -0.0925 -0.0388 -0.4825 0.052 Uiso 1 1 calc R . . . .
 H6B H -0.1921 -0.1453 -0.4812 0.052 Uiso 1 1 calc R . . . .
 C11 C -0.3001(10) -0.2559(18) -0.2327(8) 0.034(3) Uani 1 1 d . . . . .
 H11 H -0.2727 -0.2635 -0.2806 0.041 Uiso 1 1 calc R . . . .
 C13 C -0.2811(11) 0.4629(17) -0.5600(8) 0.033(3) Uani 1 1 d . . . . .
 C19 C -0.2111(13) -0.662(2) -0.2541(9) 0.042(4) Uani 1 1 d . . . . .
 C20 C -0.3907(13) -0.5275(18) -0.2596(10) 0.042(4) Uani 1 1 d . . . . .
 H20A H -0.3834 -0.4960 -0.3129 0.051 Uiso 1 1 calc R . . . .
 H20B H -0.4601 -0.5574 -0.2531 0.051 Uiso 1 1 calc R . . . .
 C21 C -0.0920(11) -0.2175(19) -0.3961(8) 0.036(4) Uani 1 1 d . . . . .
 C26 C -0.1900(11) 0.0592(17) -0.4073(9) 0.032(3) Uani 1 1 d . . . . .
 H26A H -0.1431 0.1059 -0.3690 0.038 Uiso 1 1 calc R . . . .
 H26B H -0.2475 0.0155 -0.3814 0.038 Uiso 1 1 calc R . . . .
 C28 C -0.3124(10) -0.1086(19) -0.1132(8) 0.032(3) Uani 1 1 d . . . . .
 C29 C -0.1537(12) 0.3106(19) -0.4910(8) 0.040(4) Uani 1 1 d . . . . .
 H29 H -0.0865 0.2975 -0.4768 0.047 Uiso 1 1 calc R . . . .
 C31 C -0.2727(11) -0.1177(19) -0.1837(8) 0.035(3) Uani 1 1 d . . . . .
 H31 H -0.2281 -0.0334 -0.1993 0.042 Uiso 1 1 calc R . . . .
 C32 C -0.1826(10) 0.4391(18) -0.5402(9) 0.034(4) Uani 1 1 d . . . . .
 H32 H -0.1348 0.5116 -0.5605 0.041 Uiso 1 1 calc R . . . .
 C33 C -0.4023(12) -0.366(2) -0.1413(9) 0.043(4) Uani 1 1 d . . . . .
 H33 H -0.4447 -0.4535 -0.1253 0.052 Uiso 1 1 calc R . . . .
 C34 C -0.3266(11) -0.6850(19) -0.2414(9) 0.041(4) Uani 1 1 d . . . . .
 H34A H -0.3510 -0.7812 -0.2728 0.049 Uiso 1 1 calc R . . . .
 H34B H -0.3351 -0.7166 -0.1883 0.049 Uiso 1 1 calc R . . . .
 C53 C -0.3189(12) 0.219(2) -0.4817(9) 0.045(4) Uani 1 1 d . . . . .
 H53 H -0.3652 0.1418 -0.4627 0.054 Uiso 1 1 calc R . . . .
 C58 C -0.3510(11) 0.353(2) -0.5301(9) 0.041(4) Uani 1 1 d . . . . .
 H58 H -0.4186 0.3681 -0.5422 0.049 Uiso 1 1 calc R . . . .
 C4 C -0.3798(12) -0.231(2) -0.0935(9) 0.046(4) Uani 1 1 d . . . . .
 H4 H -0.4108 -0.2225 -0.0470 0.055 Uiso 1 1 calc R . . . .
 Cl1 Cl -0.4229(3) -0.1760(6) -0.3961(2) 0.0523(11) Uani 1 1 d . . . . .

loop_
  _atom_site_aniso_label
  _atom_site_aniso_U_11
  _atom_site_aniso_U_22
  _atom_site_aniso_U_33
  _atom_site_aniso_U_23
  _atom_site_aniso_U_13
  _atom_site_aniso_U_12
 Pb1 0.0581(5) 0.0230(4) 0.0238(4) 0.0001(2) -0.0009(3) 0.0015(2)
 Cl7 0.073(3) 0.049(2) 0.021(2) 0.0030(17) -0.0010(18) 0.011(2)
 O1 0.054(7) 0.053(8) 0.043(8) 0.027(6) 0.001(6) -0.003(5)
 O2 0.073(7) 0.028(6) 0.021(6) 0.005(4) -0.003(5) -0.009(5)
 O4 0.085(8) 0.032(6) 0.021(6) 0.002(5) 0.002(5) 0.013(6)
 O17 0.072(8) 0.040(7) 0.053(8) 0.018(6) 0.007(6) -0.001(6)
 N7 0.048(8) 0.031(7) 0.023(7) 0.006(5) -0.007(6) 0.001(5)
 N12 0.051(7) 0.033(7) 0.007(6) -0.005(5) -0.003(5) -0.010(5)
 C6 0.053(10) 0.034(8) 0.043(10) -0.003(8) 0.001(8) 0.008(7)
 C11 0.046(9) 0.031(8) 0.027(8) -0.003(6) 0.008(7) 0.009(7)
 C13 0.051(10) 0.029(8) 0.018(8) -0.004(6) 0.003(7) -0.005(6)
 C19 0.078(12) 0.022(8) 0.027(9) -0.016(7) -0.005(8) -0.007(8)
 C20 0.055(10) 0.038(9) 0.033(10) -0.005(7) 0.001(8) -0.004(7)
 C21 0.049(9) 0.036(9) 0.023(9) 0.001(7) -0.006(7) -0.002(7)
 C26 0.036(8) 0.034(9) 0.025(8) 0.006(6) -0.009(6) -0.002(6)
 C28 0.043(8) 0.027(8) 0.027(8) -0.011(7) -0.001(6) -0.008(7)
 C29 0.060(10) 0.027(9) 0.031(9) 0.010(7) -0.002(7) -0.009(7)
 C31 0.060(10) 0.025(8) 0.021(8) 0.007(6) 0.004(7) 0.007(7)
 C32 0.033(8) 0.032(9) 0.039(10) -0.002(7) 0.011(7) -0.010(6)
 C33 0.066(10) 0.029(9) 0.036(9) -0.010(7) 0.009(8) -0.007(7)
 C34 0.058(10) 0.034(9) 0.030(9) 0.004(7) -0.001(7) -0.009(7)
 C53 0.053(10) 0.043(10) 0.039(10) 0.011(8) -0.004(8) -0.008(7)
 C58 0.032(8) 0.045(10) 0.046(10) 0.006(8) 0.002(7) -0.003(7)
 C4 0.062(10) 0.048(10) 0.027(9) -0.007(7) 0.011(8) -0.003(8)
 Cl1 0.066(3) 0.051(3) 0.040(2) 0.007(2) -0.002(2) 0.005(2)

_geom_special_details
;
 All esds (except the esd in the dihedral angle between two l.s. planes)
 are estimated using the full covariance matrix.  The cell esds are taken
 into account individually in the estimation of esds in distances, angles
 and torsion angles; correlations between esds in cell parameters are only
 used when they are defined by crystal symmetry.  An approximate (isotropic)
 treatment of cell esds is used for estimating esds involving l.s. planes.
;
loop_
  _geom_bond_atom_site_label_1
  _geom_bond_atom_site_label_2
  _geom_bond_distance
  _geom_bond_site_symmetry_2
  _geom_bond_publ_flag
 Pb1 Cl7 2.810(4) . ?
 Pb1 O1 2.417(11) . ?
 Pb1 O2 2.477(10) . ?
 Pb1 O4 2.605(10) . ?
 O1 C19 1.273(18) . ?
 O2 C21 1.316(17) . ?
 O4 C21 1.227(17) . ?
 O17 C19 1.230(18) . ?
 N7 C26 1.503(17) . ?
 N7 C29 1.358(18) . ?
 N7 C53 1.336(18) . ?
 N12 C11 1.333(17) . ?
 N12 C20 1.470(18) . ?
 N12 C33 1.342(18) . ?
 C6 H6A 0.9700 . ?
 C6 H6B 0.9700 . ?
 C6 C21 1.51(2) . ?
 C6 C26 1.50(2) . ?
 C11 H11 0.9300 . ?
 C11 C31 1.40(2) . ?
 C13 C28 1.50(2) 4_565 ?
 C13 C32 1.36(2) . ?
 C13 C58 1.38(2) . ?
 C19 C34 1.58(2) . ?
 C20 H20A 0.9700 . ?
 C20 H20B 0.9700 . ?
 C20 C34 1.51(2) . ?
 C26 H26A 0.9700 . ?
 C26 H26B 0.9700 . ?
 C28 C13 1.50(2) 4_566 ?
 C28 C31 1.365(19) . ?
 C28 C4 1.36(2) . ?
 C29 H29 0.9300 . ?
 C29 C32 1.36(2) . ?
 C31 H31 0.9300 . ?
 C32 H32 0.9300 . ?
 C33 H33 0.9300 . ?
 C33 C4 1.36(2) . ?
 C34 H34A 0.9700 . ?
 C34 H34B 0.9700 . ?
 C53 H53 0.9300 . ?
 C53 C58 1.39(2) . ?
 C58 H58 0.9300 . ?
 C4 H4 0.9300 . ?

loop_
  _geom_angle_atom_site_label_1
  _geom_angle_atom_site_label_2
  _geom_angle_atom_site_label_3
  _geom_angle
  _geom_angle_site_symmetry_1
  _geom_angle_site_symmetry_3
  _geom_angle_publ_flag
 O1 Pb1 Cl7 91.3(3) . . ?
 O1 Pb1 O2 75.9(3) . . ?
 O1 Pb1 O4 80.7(4) . . ?
 O2 Pb1 Cl7 77.9(2) . . ?
 O2 Pb1 O4 51.6(3) . . ?
 O4 Pb1 Cl7 129.4(2) . . ?
 C19 O1 Pb1 107.8(10) . . ?
 C21 O2 Pb1 95.4(8) . . ?
 C21 O4 Pb1 91.7(9) . . ?
 C29 N7 C26 120.3(12) . . ?
 C53 N7 C26 119.4(12) . . ?
 C53 N7 C29 120.2(13) . . ?
 C11 N12 C20 121.9(12) . . ?
 C11 N12 C33 119.1(12) . . ?
 C33 N12 C20 118.8(13) . . ?
 H6A C6 H6B 107.8 . . ?
 C21 C6 H6A 109.0 . . ?
 C21 C6 H6B 109.0 . . ?
 C26 C6 H6A 109.0 . . ?
 C26 C6 H6B 109.0 . . ?
 C26 C6 C21 112.8(14) . . ?
 N12 C11 H11 119.6 . . ?
 N12 C11 C31 120.8(13) . . ?
 C31 C11 H11 119.6 . . ?
 C32 C13 C28 120.0(13) . 4_565 ?
 C32 C13 C58 119.1(14) . . ?
 C58 C13 C28 120.9(14) . 4_565 ?
 O1 C19 C34 114.3(14) . . ?
 O17 C19 O1 128.2(16) . . ?
 O17 C19 C34 117.5(14) . . ?
 N12 C20 H20A 109.0 . . ?
 N12 C20 H20B 109.0 . . ?
 N12 C20 C34 113.1(13) . . ?
 H20A C20 H20B 107.8 . . ?
 C34 C20 H20A 109.0 . . ?
 C34 C20 H20B 109.0 . . ?
 O2 C21 C6 116.9(13) . . ?
 O4 C21 O2 121.2(13) . . ?
 O4 C21 C6 121.9(13) . . ?
 N7 C26 H26A 109.6 . . ?
 N7 C26 H26B 109.6 . . ?
 C6 C26 N7 110.4(13) . . ?
 C6 C26 H26A 109.6 . . ?
 C6 C26 H26B 109.6 . . ?
 H26A C26 H26B 108.1 . . ?
 C31 C28 C13 119.2(13) . 4_566 ?
 C4 C28 C13 122.1(13) . 4_566 ?
 C4 C28 C31 118.7(14) . . ?
 N7 C29 H29 119.8 . . ?
 C32 C29 N7 120.5(14) . . ?
 C32 C29 H29 119.8 . . ?
 C11 C31 H31 120.4 . . ?
 C28 C31 C11 119.2(14) . . ?
 C28 C31 H31 120.4 . . ?
 C13 C32 H32 119.7 . . ?
 C29 C32 C13 120.5(14) . . ?
 C29 C32 H32 119.7 . . ?
 N12 C33 H33 119.2 . . ?
 N12 C33 C4 121.6(15) . . ?
 C4 C33 H33 119.2 . . ?
 C19 C34 H34A 108.4 . . ?
 C19 C34 H34B 108.4 . . ?
 C20 C34 C19 115.7(13) . . ?
 C20 C34 H34A 108.4 . . ?
 C20 C34 H34B 108.4 . . ?
 H34A C34 H34B 107.4 . . ?
 N7 C53 H53 119.7 . . ?
 N7 C53 C58 120.5(14) . . ?
 C58 C53 H53 119.7 . . ?
 C13 C58 C53 119.1(14) . . ?
 C13 C58 H58 120.4 . . ?
 C53 C58 H58 120.4 . . ?
 C28 C4 C33 120.5(14) . . ?
 C28 C4 H4 119.8 . . ?
 C33 C4 H4 119.8 . . ?

loop_
  _geom_torsion_atom_site_label_1
  _geom_torsion_atom_site_label_2
  _geom_torsion_atom_site_label_3
  _geom_torsion_atom_site_label_4
  _geom_torsion
  _geom_torsion_site_symmetry_1
  _geom_torsion_site_symmetry_2
  _geom_torsion_site_symmetry_3
  _geom_torsion_site_symmetry_4
  _geom_torsion_publ_flag
 Pb1 O1 C19 O17 -17.9(19) . . . . ?
 Pb1 O1 C19 C34 160.9(9) . . . . ?
 Pb1 O2 C21 O4 -3.7(15) . . . . ?
 Pb1 O2 C21 C6 174.6(11) . . . . ?
 Pb1 O4 C21 O2 3.5(14) . . . . ?
 Pb1 O4 C21 C6 -174.7(13) . . . . ?
 O1 C19 C34 C20 -25.8(19) . . . . ?
 O17 C19 C34 C20 153.1(14) . . . . ?
 N7 C29 C32 C13 2(2) . . . . ?
 N7 C53 C58 C13 2(2) . . . . ?
 N12 C11 C31 C28 1(2) . . . . ?
 N12 C20 C34 C19 -62.3(18) . . . . ?
 N12 C33 C4 C28 -5(3) . . . . ?
 C11 N12 C20 C34 92.8(17) . . . . ?
 C11 N12 C33 C4 3(2) . . . . ?
 C13 C28 C31 C11 178.5(13) 4_566 . . . ?
 C13 C28 C4 C33 -176.5(14) 4_566 . . . ?
 C20 N12 C11 C31 -176.7(13) . . . . ?
 C20 N12 C33 C4 178.9(14) . . . . ?
 C21 C6 C26 N7 169.9(12) . . . . ?
 C26 N7 C29 C32 -179.7(13) . . . . ?
 C26 N7 C53 C58 177.7(14) . . . . ?
 C26 C6 C21 O2 3(2) . . . . ?
 C26 C6 C21 O4 -178.8(14) . . . . ?
 C28 C13 C32 C29 178.5(14) 4_565 . . . ?
 C28 C13 C58 C53 179.5(14) 4_565 . . . ?
 C29 N7 C26 C6 -75.5(16) . . . . ?
 C29 N7 C53 C58 -2(2) . . . . ?
 C31 C28 C4 C33 4(2) . . . . ?
 C32 C13 C58 C53 -1(2) . . . . ?
 C33 N12 C11 C31 -1(2) . . . . ?
 C33 N12 C20 C34 -82.6(18) . . . . ?
 C53 N7 C26 C6 105.3(16) . . . . ?
 C53 N7 C29 C32 0(2) . . . . ?
 C58 C13 C32 C29 -1(2) . . . . ?
 C4 C28 C31 C11 -2(2) . . . . ?

_shelx_res_file
;
    14.res created by SHELXL-2014/7

TITL 14 P21/c
CELL 0.71073 13.4033 7.6867 17.4828 90 92.257 90
ZERR 2 0.0014 0.0004 0.0014 0 0.009 0
LATT 1
SYMM -X,0.5+Y,0.5-Z

SFAC C H Cl N O Pb
UNIT 64 64 8 8 16 4

L.S. 10
PLAN  -20
BOND $H
CONF
MORE -1
fmap 2
acta
REM <HKL>C:/Users/csun/Desktop/struct/tmp/14.hkl</HKL>

WGHT    0.092400
FVAR       0.15431
PB1   6   -0.017285   -0.467143   -0.282435    11.00000    0.05808    0.02303 =
         0.02377    0.00013   -0.00094    0.00147
CL7   3   -0.057932   -0.314802   -0.140929    11.00000    0.07307    0.04939 =
         0.02110    0.00301   -0.00100    0.01078
O1    5   -0.190486   -0.547689   -0.303570    11.00000    0.05422    0.05303 =
         0.04311    0.02675    0.00132   -0.00334
O2    5   -0.100591   -0.192182   -0.322231    11.00000    0.07349    0.02774 =
         0.02054    0.00546   -0.00253   -0.00889
O4    5   -0.047299   -0.344258   -0.420295    11.00000    0.08461    0.03244 =
         0.02138    0.00166    0.00230    0.01317
O17   5   -0.153070   -0.753079   -0.215218    11.00000    0.07155    0.04032 =
         0.05307    0.01847    0.00748   -0.00097
N7    4   -0.222167    0.200840   -0.462191    11.00000    0.04768    0.03143 =
         0.02272    0.00640   -0.00717    0.00118
N12   4   -0.364812   -0.376435   -0.211248    11.00000    0.05060    0.03337 =
         0.00723   -0.00536   -0.00313   -0.00978
C6    1   -0.141819   -0.086641   -0.449213    11.00000    0.05261    0.03448 =
         0.04281   -0.00306    0.00096    0.00799
AFIX  23
H6A   2   -0.092494   -0.038786   -0.482479    11.00000   -1.20000
H6B   2   -0.192145   -0.145290   -0.481181    11.00000   -1.20000
AFIX   0
C11   1   -0.300080   -0.255914   -0.232662    11.00000    0.04568    0.03086 =
         0.02690   -0.00268    0.00805    0.00894
AFIX  43
H11   2   -0.272713   -0.263494   -0.280612    11.00000   -1.20000
AFIX   0
C13   1   -0.281088    0.462866   -0.560008    11.00000    0.05071    0.02884 =
         0.01813   -0.00399    0.00259   -0.00460
C19   1   -0.211120   -0.662302   -0.254085    11.00000    0.07762    0.02227 =
         0.02693   -0.01625   -0.00511   -0.00662
C20   1   -0.390657   -0.527480   -0.259633    11.00000    0.05507    0.03795 =
         0.03336   -0.00527    0.00073   -0.00441
AFIX  23
H20A  2   -0.383436   -0.496007   -0.312859    11.00000   -1.20000
H20B  2   -0.460100   -0.557434   -0.253072    11.00000   -1.20000
AFIX   0
C21   1   -0.091953   -0.217497   -0.396150    11.00000    0.04894    0.03557 =
         0.02255    0.00141   -0.00571   -0.00190
C26   1   -0.189970    0.059193   -0.407333    11.00000    0.03635    0.03393 =
         0.02456    0.00605   -0.00942   -0.00151
AFIX  23
H26A  2   -0.143075    0.105918   -0.368961    11.00000   -1.20000
H26B  2   -0.247542    0.015514   -0.381423    11.00000   -1.20000
AFIX   0
C28   1   -0.312391   -0.108553   -0.113152    11.00000    0.04310    0.02744 =
         0.02662   -0.01142   -0.00091   -0.00769
C29   1   -0.153672    0.310587   -0.490958    11.00000    0.05954    0.02740 =
         0.03142    0.01017   -0.00248   -0.00947
AFIX  43
H29   2   -0.086471    0.297541   -0.476822    11.00000   -1.20000
AFIX   0
C31   1   -0.272715   -0.117740   -0.183749    11.00000    0.06038    0.02474 =
         0.02090    0.00656    0.00417    0.00735
AFIX  43
H31   2   -0.228058   -0.033396   -0.199258    11.00000   -1.20000
AFIX   0
C32   1   -0.182565    0.439097   -0.540162    11.00000    0.03330    0.03194 =
         0.03883   -0.00212    0.01124   -0.01002
AFIX  43
H32   2   -0.134830    0.511608   -0.560539    11.00000   -1.20000
AFIX   0
C33   1   -0.402328   -0.366155   -0.141347    11.00000    0.06551    0.02939 =
         0.03595   -0.00969    0.00878   -0.00720
AFIX  43
H33   2   -0.444713   -0.453469   -0.125257    11.00000   -1.20000
AFIX   0
C34   1   -0.326588   -0.684954   -0.241394    11.00000    0.05789    0.03356 =
         0.02995    0.00434   -0.00071   -0.00895
AFIX  23
H34A  2   -0.351020   -0.781157   -0.272774    11.00000   -1.20000
H34B  2   -0.335150   -0.716591   -0.188343    11.00000   -1.20000
AFIX   0
C53   1   -0.318932    0.219194   -0.481704    11.00000    0.05258    0.04332 =
         0.03905    0.01120   -0.00360   -0.00841
AFIX  43
H53   2   -0.365222    0.141814   -0.462735    11.00000   -1.20000
AFIX   0
C58   1   -0.350952    0.352891   -0.530087    11.00000    0.03181    0.04463 =
         0.04619    0.00569    0.00198   -0.00266
AFIX  43
H58   2   -0.418582    0.368123   -0.542168    11.00000   -1.20000
AFIX   0
C4    1   -0.379832   -0.231088   -0.093494    11.00000    0.06189    0.04802 =
         0.02739   -0.00680    0.01107   -0.00283
AFIX  43
H4    2   -0.410822   -0.222501   -0.046975    11.00000   -1.20000
AFIX   0

CL1   3   -0.422871   -0.175992   -0.396071    11.00000    0.06570    0.05061 =
         0.04028    0.00719   -0.00204    0.00544
HKLF 4 1 0 1 0 1 0 0 0 0 -1

REM  14 P21/c
REM R1 =  0.0768 for    2400 Fo > 4sig(Fo)  and  0.1103 for all    3412 data
REM    226 parameters refined using      0 restraints

END

WGHT      0.0923      0.0000

REM Highest difference peak  6.607,  deepest hole -2.427,  1-sigma level  0.397
Q1    1  -0.0971 -0.4667 -0.2814  11.00000  0.05    6.61
Q2    1   0.0608 -0.4663 -0.2818  11.00000  0.05    6.57
Q3    1  -0.1424 -0.3148 -0.1417  11.00000  0.05    1.27
Q4    1   0.0910 -0.3019 -0.2806  11.00000  0.05    1.07
Q5    1  -0.0889 -0.4658 -0.4437  11.00000  0.05    0.95
Q6    1  -0.0972 -0.4762 -0.2209  11.00000  0.05    0.93
Q7    1  -0.0233  0.0964 -0.5361  11.00000  0.05    0.88
Q8    1  -0.1422 -0.7153 -0.2325  11.00000  0.05    0.88
Q9    1  -0.0198 -0.0508 -0.5199  11.00000  0.05    0.84
Q10   1  -0.0767 -0.0929 -0.4612  11.00000  0.05    0.84
Q11   1  -0.0420 -0.0553 -0.4597  11.00000  0.05    0.83
Q12   1  -0.1926 -0.2857 -0.1379  11.00000  0.05    0.82
Q13   1   0.0573 -0.4779 -0.1458  11.00000  0.05    0.82
Q14   1  -0.1958  0.5207 -0.5259  11.00000  0.05    0.82
Q15   1  -0.3650 -0.7486 -0.2141  11.00000  0.05    0.80
Q16   1  -0.2807 -0.7436 -0.2333  11.00000  0.05    0.78
Q17   1  -0.4868 -0.8501 -0.2474  11.00000  0.05    0.77
Q18   1  -0.1642 -0.1855 -0.1822  11.00000  0.05    0.77
Q19   1  -0.2404  0.5991 -0.6172  11.00000  0.05    0.76
Q20   1  -0.4641 -0.4617 -0.2579  11.00000  0.05    0.75
;
_shelx_res_checksum               62209
_shelx_hkl_file
;
   0   0   3   -1.75    2.19
   0   0  -3    1.94    1.97
   0   0  -4 1785.86  447.30
   0   0   4 1689.48  447.30
   0   0  -4 1850.25  447.43
   0   0  -5   -1.35    3.10
   0   0   5   -0.79    3.31
   0   0  -5   -1.11    4.22
   0   0  -6  946.29  258.17
   0   0  -6 1177.10  258.43
   0   0   6  994.95  258.16
   0   0  -7    4.41    5.08
   0   0  -7    1.90    3.84
   0   0   7    0.73    4.00
   0   0   7    4.17    5.37
   0   0  -8   11.94    5.17
   0   0   8    9.81    5.26
   0   0   8    7.49    6.30
   0   0  -8   15.98    7.03
   0   0   9    2.34    4.61
   0   0  -9    9.89    6.58
   0   0   9   -8.06    6.35
   0   0  -9   -0.98    4.26
   0   0  10  395.44  114.23
   0   0 -10  542.56  114.85
   0   0  10  497.07  114.71
   0   0 -10  419.73  114.23
   0   0  11   -0.28    5.59
   0   0  11   -3.30    7.09
   0   0 -11    4.47    5.17
   0   0 -11    1.54    7.38
   0   0  12  752.15  218.09
   0   0 -12 1207.97  219.01
   0   0 -12  762.53  218.09
   0   0 -13   -5.57    9.03
   0   0  13    4.64    6.64
   0   0 -13   -2.46    6.07
   0   0 -14  805.96  133.85
   0   0 -14  415.77  132.41
   0   0  14  451.47  132.49
   0   0  15   -7.92    7.96
   0   0 -15  -14.85    7.18
   0   0  16  524.86  140.77
   0   0 -16  380.70  140.55
   0   0 -17  -20.30   13.08
   0   0 -17    1.34    7.13
   0   0 -18  288.86   44.43
   0   0 -18   82.90   41.05
   0   0 -19    7.74   14.64
   0   0 -20   62.76   23.03
   0   0 -21   24.01   16.78
   1   0   0    0.28    2.00
   1   0   0   -0.27    1.76
  -1   0  -1  102.11   16.12
  -1   0   1   86.38   16.17
   1   0   1   14.20   15.97
   1   0  -1   84.58   16.17
   1   0  -1   30.66   16.08
  -1   0  -2    4.25    2.80
   1   0  -2    8.23    2.29
   1   0  -2    5.11    2.42
  -1   0   2    5.11    2.98
  -1   0   2    3.77    2.37
   1   0  -2    3.66    2.70
  -1   0  -2    2.73    2.95
   1   0   2   -0.42    2.84
  -1   0   2    4.10    2.34
  -1   0   3  492.10  118.63
   1   0   3  468.17  118.63
   1   0  -3  430.34  118.55
   1   0  -3  502.06  118.65
   1   0   3  490.11  118.65
  -1   0   3  439.28  118.55
  -1   0  -3  490.20  118.65
  -1   0  -3  510.77  118.66
  -1   0   3  433.22  118.50
   1   0  -4    4.55    3.68
  -1   0   4    1.07    3.70
  -1   0   4    6.52    2.99
  -1   0  -4    2.15    3.87
   1   0   4    4.91    4.30
  -1   0   4    5.16    3.97
  -1   0  -4    5.28    4.24
   1   0   4    1.19    4.10
   1   0  -4    8.52    2.86
   1   0  -4   -0.71    4.12
  -1   0   5 2124.15  608.48
  -1   0   5 2286.71  608.62
   1   0   5 2561.34  608.73
   1   0   5 2451.97  608.64
  -1   0  -5 2649.21  608.69
   1   0  -5 2315.83  608.50
   1   0  -5 2529.23  608.66
  -1   0   5 2710.86  608.71
   1   0  -6   85.65   31.67
  -1   0  -6  139.19   32.07
  -1   0   6  120.97   31.73
   1   0  -6  151.78   32.16
   1   0   6  142.56   32.26
   1   0   6  129.77   32.01
  -1   0   6  131.76   32.08
  -1   0   6  137.66   32.15
   1   0   7 2705.87  618.43
   1   0  -7 1588.36  618.01
  -1   0   7 2840.50  618.40
  -1   0   7 2439.77  618.11
   1   0  -7 3390.07  618.53
  -1   0   7 2753.46  618.38
   1   0   7 2583.63  618.27
  -1   0  -7 2759.44  618.32
   1   0   8  458.20   97.77
  -1   0   8  379.04   97.26
  -1   0   8  444.51   97.67
   1   0   8  412.87   97.48
  -1   0  -8  416.45   97.52
   1   0  -8  225.56   97.12
   1   0  -8  544.40   97.84
  -1   0   8  451.40   97.68
  -1   0   9 1324.71  282.87
   1   0   9 1222.03  282.86
   1   0  -9  642.67  282.28
  -1   0  -9 1230.44  282.67
   1   0  -9 1650.55  283.07
   1   0   9 1124.28  282.60
  -1   0   9 1187.01  282.46
  -1   0   9 1269.81  282.82
   1   0  10    0.95    5.73
  -1   0  10    2.85    6.36
   1   0 -10    5.73    6.32
   1   0 -10    3.76    3.79
  -1   0  10    8.58    6.61
  -1   0  10    2.03    4.48
  -1   0 -10    1.34    5.72
  -1   0  11  623.18  144.15
   1   0  11  560.64  143.84
  -1   0 -11  605.78  143.91
  -1   0  11  769.14  144.37
  -1   0  11  563.25  143.66
   1   0 -11  903.01  144.59
   1   0 -11  321.48  143.43
  -1   0  12   13.24    8.15
  -1   0 -12    5.85    7.26
  -1   0  12    9.70    6.04
   1   0  12    8.78    7.15
   1   0 -12    8.76    5.21
   1   0 -12   13.57    8.94
  -1   0  12   11.92    7.96
   1   0 -13  239.52   39.07
   1   0  13  125.22   37.69
   1   0 -13   98.37   37.12
  -1   0 -13  161.49   37.86
  -1   0  13  141.31   37.44
  -1   0  14   11.83    6.77
   1   0 -14    7.87    5.51
   1   0 -14   17.55   10.22
  -1   0 -14    3.11    7.82
   1   0  14   -4.97    7.76
   1   0  15    3.94    7.73
  -1   0 -15   -0.47    7.59
  -1   0  15    1.66    6.63
   1   0 -15   11.28   10.62
  -1   0 -15   -2.26   11.34
   1   0 -15   -2.45    5.54
   1   0 -16   75.42   16.42
   1   0 -16   25.15   11.87
  -1   0 -16   31.77   13.20
  -1   0 -16   64.20   16.85
   1   0  16   17.08   12.90
   1   0 -17    7.77    7.65
  -1   0 -17    0.87   13.47
  -1   0 -17   18.76    9.64
  -1   0 -18   14.92   12.98
   1   0 -18    4.39   12.23
  -1   0 -18   -7.62    9.15
   1   0 -19  121.07   34.08
  -1   0 -19  113.32   34.63
   1   0 -20   68.96   20.63
  -1   0 -20   30.65   20.25
   1   0 -21  258.87   67.47
  -1   0 -21  244.25   67.58
  -2   0   0  275.48   77.07
   2   0   0  302.37   77.12
   2   0   0  309.18   77.11
  -2   0   0  319.65   77.15
   2   0  -1  156.70   43.52
  -2   0   1  178.60   43.58
  -2   0   1  157.49   43.53
  -2   0  -1  177.24   43.29
   2   0   1  169.74   43.60
   2   0   1  175.60   43.28
   2   0   1  167.30   43.62
   2   0  -1  155.29   43.51
   2   0   2 1444.52  348.25
   2   0  -2 1307.38  348.31
  -2   0  -2 1548.61  348.28
  -2   0   2 1386.10  348.34
  -2   0   2 1206.02  348.31
   2   0  -2 1257.31  348.33
  -2   0   3   36.21   10.87
  -2   0  -3   52.48   10.98
  -2   0   3   35.93   10.42
  -2   0   3   31.22   11.09
   2   0  -3   31.39   10.88
   2   0  -3   35.42   10.79
  -2   0  -3   45.61   11.30
   2   0   3   45.91   10.85
   2   0  -3   39.72   10.42
  -2   0   4  860.69  225.29
   2   0   4  947.59  225.55
  -2   0   4  830.23  225.35
  -2   0  -4  975.84  225.58
   2   0   4 1017.16  225.49
   2   0  -4  752.70  225.41
   2   0  -4  911.54  225.31
  -2   0  -4 1070.77  225.53
  -2   0   4  660.84  225.39
  -2   0  -5   85.84   18.63
  -2   0   5   21.60   17.86
   2   0   5   77.10   18.60
  -2   0  -5   95.53   18.56
   2   0  -5   82.70   18.21
  -2   0   5   52.21   18.25
   2   0   5   70.63   18.39
  -2   0   5   71.56   18.07
   2   0  -5   64.65   18.40
  -2   0   5   70.89   18.10
  -2   0  -6  180.95   36.53
  -2   0   6   91.98   35.87
   2   0   6  149.60   36.37
  -2   0   6  110.80   36.21
   2   0  -6  156.93   36.21
  -2   0   6  141.25   36.11
  -2   0  -6  177.84   36.52
   2   0  -6  120.78   36.30
   2   0   6  174.96   36.45
  -2   0   6  131.58   36.01
  -2   0  -7   21.22    7.11
  -2   0   7   15.71    5.57
   2   0   7   16.75    7.01
  -2   0  -7   24.25    7.38
  -2   0   7    9.87    6.35
   2   0   7   11.43    6.80
   2   0  -7   12.09    6.62
  -2   0   7   20.56    6.42
   2   0  -7   20.50    6.50
  -2   0   7    5.92    5.31
  -2   0   8   68.20   32.49
   2   0   8  161.33   33.37
  -2   0  -8  167.46   33.42
   2   0  -8  134.62   33.05
  -2   0   8  130.01   33.01
  -2   0  -8  162.09   33.30
   2   0   8  134.41   33.14
  -2   0   8   84.22   32.87
  -2   0   9   11.41    6.11
   2   0  -9   10.69    6.39
  -2   0  -9   11.84    6.90
   2   0  -9   -0.22    4.77
   2   0   9    6.19    6.42
  -2   0   9    3.60    4.59
   2   0   9   13.48    6.88
  -2   0  -9   14.00    6.65
  -2   0   9   12.46    6.32
  -2   0  10   96.72   32.55
   2   0  10  151.16   32.80
  -2   0  10   85.59   32.01
  -2   0 -10  163.07   32.98
   2   0 -10  147.51   32.85
  -2   0 -10  187.85   33.49
   2   0 -10   78.49   31.98
   2   0  10  149.26   33.05
  -2   0  10  138.24   32.69
  -2   0 -11   31.02   10.33
   2   0  11   28.83   10.40
  -2   0  11   25.55   10.26
   2   0 -11   21.29    8.72
   2   0  11   22.43   10.89
  -2   0  11   40.29   10.60
  -2   0 -11   40.20   11.43
  -2   0  11   16.77    8.76
   2   0 -11   41.17   11.03
  -2   0  12  265.08  103.27
   2   0 -12  569.36  104.34
   2   0  12  465.45  103.93
  -2   0 -12  626.37  104.78
  -2   0  12  469.81  104.04
   2   0 -12  262.06  103.25
  -2   0 -12  517.36  104.13
  -2   0  12  318.68  103.73
  -2   0 -13  425.69   67.10
   2   0 -13  379.26   66.51
  -2   0 -13  358.86   66.27
  -2   0  13  172.78   65.16
   2   0  13  280.21   65.91
   2   0 -13  115.64   65.02
   2   0 -14  190.45  101.04
  -2   0 -14  515.43  102.10
   2   0 -14  669.52  102.78
  -2   0  14  253.07  101.13
   2   0  14  449.88  101.90
  -2   0 -14  671.47  103.21
  -2   0 -15  324.25   68.65
   2   0 -15  419.62   69.45
  -2   0 -15  452.08   70.08
   2   0 -16  368.14   60.25
  -2   0 -16  283.74   59.28
  -2   0 -16  389.69   60.98
   2   0 -17   30.09   15.90
  -2   0 -17   25.47   13.85
  -2   0 -17   61.94   17.43
  -2   0 -18  215.98   67.25
   2   0 -18  319.39   68.55
  -2   0 -19   12.44   10.41
   2   0 -19    1.82   13.92
   2   0 -20  120.97   35.21
   3   0   0   -8.05    5.04
   3   0   0    2.18    5.33
  -3   0   0   -3.22    4.99
  -3   0  -1  321.40   78.22
   3   0  -1  288.00   78.14
   3   0   1  321.75   78.19
  -3   0  -1  314.00   77.75
   3   0   1  281.48   78.15
   3   0  -1  298.30   78.10
   3   0   1  309.75   77.74
  -3   0   1  265.64   78.08
  -3   0   1  320.01   78.20
   3   0  -2   11.91    6.34
  -3   0  -2   13.35    5.10
  -3   0   2   14.02    6.10
   3   0   2   18.05    6.62
   3   0   2   17.66    5.05
  -3   0   2   15.20    6.23
   3   0  -2   13.35    6.24
  -3   0   3  735.37  209.10
   3   0   3 1053.79  209.43
  -3   0   3 1085.55  209.62
  -3   0   3  741.59  209.11
   3   0  -3  990.94  209.55
  -3   0   3  907.55  209.56
  -3   0  -3 1242.87  209.51
   3   0  -3  814.60  209.55
  -3   0   4    8.21    6.33
   3   0  -4    4.45    6.72
   3   0  -4   -1.47    6.13
  -3   0   4    9.00    6.58
  -3   0  -4   27.24    7.73
   3   0   4    8.52    6.07
  -3   0   4    5.16    4.97
   3   0  -5  545.00  183.63
  -3   0   5  536.56  183.62
  -3   0   5  687.86  183.43
   3   0  -5  731.68  183.45
  -3   0  -5  917.07  184.04
   3   0   5  749.41  183.68
  -3   0   5  653.79  183.59
  -3   0  -5  989.70  183.89
   3   0   5  725.14  183.84
  -3   0   6  344.34  121.35
  -3   0   6  495.51  121.22
  -3   0   6  211.05  121.07
   3   0  -6  528.85  121.26
   3   0  -6  405.45  121.44
  -3   0   6  446.58  121.32
  -3   0  -6  628.21  121.88
   3   0   6  542.22  121.70
  -3   0  -6  681.13  121.71
   3   0   6  566.87  121.55
  -3   0  -7  754.46  158.62
   3   0   7  709.73  158.41
  -3   0   7  436.18  157.97
   3   0  -7  550.52  158.33
   3   0  -7  697.97  158.16
  -3   0  -7  895.66  158.63
  -3   0   7  634.38  158.10
   3   0   7  677.22  158.49
  -3   0   7  545.32  158.08
  -3   0   7  368.93  158.12
  -3   0   8   35.11   21.62
  -3   0   8   62.62   21.37
   3   0   8   84.49   22.23
   3   0  -8   76.46   21.55
   3   0   8   88.05   22.00
  -3   0  -8  125.10   22.71
  -3   0   8   66.47   21.44
   3   0  -8   71.60   22.06
  -3   0   8   33.17   21.10
   3   0  -9  580.84  157.62
  -3   0   9  495.61  157.21
   3   0  -9  789.21  157.61
   3   0   9  741.75  157.83
  -3   0   9  327.58  157.06
  -3   0  -9  947.79  158.15
  -3   0   9  371.55  157.35
  -3   0   9  665.21  157.46
  -3   0  -9  818.96  157.99
   3   0   9  742.14  157.80
  -3   0  10  147.01   69.92
  -3   0 -10  382.01   71.15
   3   0  10  331.08   70.87
   3   0  10  315.93   70.85
  -3   0  10  275.91   70.44
  -3   0  10  204.55   70.06
   3   0 -10  329.70   70.61
  -3   0 -10  464.06   71.42
  -3   0  10  142.41   70.24
  -3   0  11  354.50  119.02
  -3   0  11  252.97  119.23
  -3   0  11  299.29  118.91
  -3   0 -11  621.46  120.01
   3   0  11  496.01  119.68
   3   0 -11  562.61  119.62
  -3   0 -11  770.23  120.41
  -3   0  11  535.45  119.50
  -3   0 -12  272.40   46.33
   3   0 -12  213.64   45.48
  -3   0 -12  203.85   45.60
  -3   0  12  124.34   44.46
  -3   0  12  105.72   44.36
  -3   0  12  209.49   45.26
   3   0 -13   62.55   17.09
  -3   0  13   40.43   15.09
  -3   0  13   17.86   15.09
  -3   0 -13   76.24   17.55
  -3   0 -13  115.94   19.01
  -3   0 -14   14.85   10.07
   3   0 -14    8.35   10.47
  -3   0  14    6.86    7.37
  -3   0 -15   18.50   12.29
  -3   0 -15   -3.88   10.09
  -3   0  15    6.08    6.48
   3   0 -15    3.25   10.40
  -3   0 -16    1.73   13.17
  -3   0 -16    5.39   10.91
   3   0 -16   38.05   12.60
   3   0 -17   46.36   17.43
  -3   0 -17   50.80   19.30
  -3   0 -17   45.59   16.79
   3   0 -18   22.87   15.80
  -3   0 -18   43.34   18.21
  -3   0 -18   37.10   14.73
  -3   0 -19  120.52   31.84
   3   0 -19  113.61   30.88
  -3   0 -19   82.04   29.83
  -3   0 -20   54.45   18.98
   3   0 -20   13.04   16.36
  -3   0 -20   21.73   14.56
   4   0   0  637.23  184.59
  -4   0   0  868.97  184.84
   4   0   0  653.09  184.63
  -4   0   1  878.74  193.30
   4   0   1  711.39  193.17
   4   0  -1  764.37  193.16
  -4   0   1  801.53  193.17
  -4   0  -1  847.99  193.34
   4   0   1  736.72  192.64
   4   0   1  754.39  193.19
   4   0  -1  687.70  193.12
  -4   0   2  804.23  184.62
  -4   0   2  792.20  184.56
   4   0  -2  653.11  184.46
   4   0   2  647.05  184.55
   4   0   2  660.37  184.10
  -4   0  -2  856.43  184.17
  -4   0  -2  751.15  184.68
   4   0  -2  617.20  184.46
   4   0   2  650.38  184.56
   4   0   3  433.26  143.61
  -4   0  -3  612.26  143.37
  -4   0   3  752.59  143.87
   4   0  -3  526.67  143.59
  -4   0   3  766.92  143.88
   4   0   3  405.38  143.63
   4   0   3  457.10  143.28
   4   0  -3  586.78  143.80
   4   0   4  541.03  132.47
   4   0  -4  486.60  132.60
   4   0  -4  408.09  132.62
  -4   0   4  551.81  132.70
  -4   0  -4  594.49  132.53
  -4   0   4  495.23  132.70
   4   0   5  288.99   68.77
  -4   0  -5  450.92   69.07
  -4   0   5  276.58   68.89
  -4   0   5  253.86   68.25
   4   0  -5  214.69   68.69
  -4   0   5  225.16   68.87
  -4   0   5  241.28   68.27
   4   0  -5  180.36   68.78
  -4   0  -5  369.04   69.47
   4   0   6   80.59   26.36
  -4   0   6   74.07   26.59
   4   0  -6   74.50   26.63
  -4   0   6  108.64   25.93
  -4   0   6  102.76   25.86
  -4   0  -6  120.13   26.65
   4   0   6   81.63   26.94
  -4   0   6   94.29   26.46
  -4   0  -6  118.07   27.26
  -4   0  -7  122.43   24.63
  -4   0   7   49.54   23.56
   4   0   7  105.91   23.86
  -4   0  -7  125.47   24.17
  -4   0   7   81.60   23.52
  -4   0   7    6.42   23.00
   4   0  -7   68.77   23.71
   4   0   7   99.38   24.33
  -4   0   7  111.88   23.14
   4   0  -8    1.88    7.14
   4   0   8   -2.04    7.88
  -4   0   8    1.28    5.58
  -4   0   8    6.51    6.79
   4   0   8   -0.41    6.86
   4   0  -8    7.31    5.56
  -4   0   8    4.75    4.94
  -4   0  -8   -3.91    8.61
  -4   0  -8    6.25    7.46
  -4   0   8    1.35    5.98
  -4   0   9   29.14   28.32
  -4   0   9  116.34   28.67
   4   0  -9   82.14   29.19
   4   0   9  154.65   29.62
  -4   0  -9  195.90   30.04
  -4   0   9   67.44   28.92
   4   0  -9  105.39   28.69
  -4   0   9   75.14   28.60
  -4   0  -9  185.31   30.46
  -4   0  10   85.01   20.73
  -4   0  10   52.28   20.64
  -4   0  10   44.27   21.10
  -4   0  10   36.64   20.21
   4   0 -10   57.26   21.53
  -4   0 -10  139.59   22.84
  -4   0 -10  104.43   22.68
   4   0 -10   91.91   21.05
   4   0 -11  222.63   46.56
  -4   0  11  131.70   45.97
  -4   0 -11  250.83   47.33
   4   0 -11  155.62   46.84
  -4   0  11  233.71   46.41
  -4   0  11   88.24   45.75
  -4   0 -11  214.31   47.31
  -4   0 -12  234.75   45.79
  -4   0  12   78.76   43.85
  -4   0  12  110.50   44.04
  -4   0 -12  200.84   45.58
   4   0 -12  236.79   44.94
  -4   0  12  233.20   44.74
  -4   0  13   73.77   21.82
  -4   0 -13  135.46   24.07
  -4   0  13   38.64   20.99
  -4   0 -13   93.57   23.30
   4   0 -13   81.08   22.43
  -4   0 -14  285.70   53.41
  -4   0 -14  181.65   52.42
  -4   0  14  116.33   51.03
   4   0 -14  284.11   52.41
  -4   0 -15  249.20   50.40
   4   0 -15  178.73   49.11
  -4   0 -15  138.56   49.36
  -4   0 -16  173.35   61.91
   4   0 -16  266.36   62.17
  -4   0 -16  276.07   63.09
   4   0 -17  274.96   66.86
  -4   0 -17  198.79   66.74
  -4   0 -17  298.64   67.81
  -4   0 -18   94.83   37.75
   4   0 -18  181.70   38.34
  -4   0 -18  130.29   39.05
  -4   0 -19   81.49   35.29
  -4   0 -19  145.88   37.06
   4   0 -19  153.89   36.13
  -5   0   0   -0.51    7.78
   5   0   0   12.58    7.45
   5   0   0    9.40    7.77
   5   0   1    6.91    2.24
   5   0  -1    0.45    6.88
  -5   0  -1    3.14    7.65
   5   0   1   12.94    7.58
   5   0  -1    6.95    7.11
   5   0   1   12.98    7.56
   5   0   1   -0.54    1.53
  -5   0   1   -1.48    7.44
   5   0  -2   75.14   26.24
   5   0   2  105.37   25.21
   5   0  -2   72.15   26.16
  -5   0  -2  122.00   27.01
   5   0   2  104.76   26.83
   5   0   2   98.79   26.59
  -5   0   2   85.40   26.32
  -5   0   2   87.68   26.37
  -5   0  -3   21.22    9.37
  -5   0  -3   23.13    6.38
  -5   0   3   14.49    8.65
   5   0   3   18.85    9.16
  -5   0   3   11.60    8.37
   5   0   3   10.32    9.36
   5   0  -3    9.28    7.96
   5   0   3   14.12    6.12
   5   0  -3    6.06    7.77
  -5   0  -4  688.18  135.49
   5   0   4  581.28  135.40
  -5   0   4  406.66  135.59
  -5   0   4  502.90  135.76
   5   0  -4  384.88  135.60
   5   0  -4  448.72  135.62
   5   0   4  499.80  135.99
  -5   0  -5  323.63   63.08
  -5   0   5  186.04   63.14
  -5   0   5  239.49   63.32
   5   0  -5  161.73   63.10
   5   0   5  261.67   62.91
   5   0  -5  212.89   63.11
   5   0  -6  465.38  108.39
  -5   0  -6  684.00  109.43
  -5   0   6  359.67  107.57
   5   0  -6  456.34  108.55
   5   0   6  576.54  108.36
  -5   0   6  397.58  107.55
  -5   0   6  509.73  108.61
  -5   0  -6  749.89  108.67
  -5   0   6  487.78  108.51
  -5   0   7  350.87   84.61
  -5   0   7  345.11   84.57
  -5   0   7  297.42   85.24
  -5   0  -7  457.33   85.49
  -5   0  -7  412.95   86.07
   5   0  -7  270.21   85.34
   5   0   7  395.34   85.29
  -5   0   7   24.30   84.60
  -5   0   7  267.03   85.30
  -5   0   8  108.92   95.39
  -5   0   8  437.37   95.42
  -5   0   8  305.27   95.98
   5   0   8  334.87   95.88
  -5   0  -8  382.95   96.50
  -5   0   8  440.27   95.48
  -5   0  -8  513.76   96.34
   5   0  -8  303.57   96.02
  -5   0   8  305.68   95.81
  -5   0   9  125.44   45.36
  -5   0  -9  178.65   46.72
  -5   0  -9  239.58   46.34
  -5   0   9  205.02   45.18
  -5   0   9  195.71   45.28
   5   0   9  170.00   45.83
   5   0  -9  125.78   45.92
  -5   0   9  122.51   45.50
   5   0 -10  401.32  122.51
  -5   0 -10  594.07  122.77
  -5   0  10  590.73  122.03
  -5   0  10  375.71  122.05
  -5   0  10  208.34  121.78
  -5   0 -10  542.16  123.07
  -5   0  10  569.79  122.10
  -5   0 -11  136.89   25.79
  -5   0  11   97.90   23.49
   5   0 -11   61.26   24.61
  -5   0  11   48.06   23.02
  -5   0  11   56.14   23.42
  -5   0 -11  121.27   25.20
  -5   0  12  165.52   63.01
  -5   0 -12  333.75   64.51
   5   0 -12  175.34   63.87
  -5   0  12  271.58   63.42
  -5   0 -12  328.08   64.78
  -5   0 -13   56.49   16.53
  -5   0 -13   51.44   16.62
  -5   0  13   26.87   13.12
  -5   0 -14   11.65   12.71
  -5   0 -14   -2.37   12.02
  -5   0 -15  -10.32   12.78
  -5   0 -15   -1.70   13.25
  -5   0 -16   -2.73   14.02
  -5   0 -16   -2.67   13.15
  -5   0 -17   -1.94   14.91
  -5   0 -17    1.83   13.31
  -5   0 -18   53.63   22.54
  -5   0 -18   62.29   21.46
   6   0   0  140.76   44.83
  -6   0   0  195.14   45.17
   6   0   1  511.48  137.66
  -6   0   1  573.91  137.76
   6   0  -1  429.70  137.45
  -6   0  -1  640.14  137.99
   6   0  -2   40.57   14.76
   6   0   2   28.63   11.50
   6   0   2   49.90   15.23
  -6   0  -2   35.42   15.52
  -6   0   2   76.32   15.63
   6   0   2   55.40   11.44
   6   0   3  294.19   79.47
  -6   0   3  312.89   80.46
   6   0  -3  211.51   80.20
  -6   0  -3  413.15   81.11
   6   0   3  341.96   79.47
   6   0   3  288.89   80.56
  -6   0  -4   17.39   11.45
   6   0  -4   13.64    9.33
   6   0   4   14.86    6.03
   6   0   4    0.64   10.56
  -6   0   4   -1.13    9.30
   6   0  -5   90.61   41.57
  -6   0  -5  195.43   41.26
  -6   0   5  159.93   42.07
   6   0   5  144.91   42.41
   6   0   5  165.49   41.04
  -6   0  -6   13.00    7.65
   6   0   6    1.39   11.20
  -6   0   6   14.17    9.56
   6   0  -6    9.43    8.87
   6   0   6   11.61    7.08
   6   0   7    1.56    7.28
  -6   0  -7    0.76   11.36
   6   0  -7   10.29    9.39
  -6   0   7   18.21    9.09
  -6   0  -7    4.57    8.11
  -6   0  -8   25.20   12.32
  -6   0  -8   14.57    9.32
  -6   0   8    7.91    9.54
   6   0  -8   17.50   10.23
   6   0   8   16.22    8.68
  -6   0  -9   12.05    9.46
  -6   0  -9    0.81   11.09
  -6   0   9   -1.92    7.61
   6   0  -9    7.77    9.37
  -6   0   9    2.59    8.61
  -6   0 -10   15.10   12.48
  -6   0  10   10.20    8.93
  -6   0 -10   13.32   10.55
   6   0 -10    2.02   10.50
   6   0 -11   57.54   31.25
  -6   0  11   72.73   30.68
  -6   0 -11  118.71   32.76
  -6   0 -12   18.77   13.34
   6   0 -12   11.72   12.51
  -6   0  12   21.17    9.90
  -6   0 -12    8.98   12.21
  -6   0 -13  422.69   85.66
  -6   0 -13  351.33   85.90
   6   0 -13  197.65   84.94
  -6   0 -14   33.05   16.13
  -6   0 -14   30.41   16.48
  -6   0 -15  237.78   76.35
  -6   0 -15  340.10   76.44
  -6   0 -16   37.01   17.34
  -6   0 -16   26.19   17.25
   7   0   0  -10.93   10.85
  -7   0   0   18.55   11.25
   7   0  -1   15.52   10.00
  -7   0   1   -5.08   10.85
   7   0   1   12.52   10.82
  -7   0  -1    9.12   11.57
  -7   0  -2  178.23   35.29
  -7   0   2  141.17   34.64
   7   0   2  100.85   34.33
   7   0  -2   75.72   33.76
  -7   0  -3    6.38   12.09
  -7   0   3   26.41   11.58
   7   0  -3    1.34   10.10
   7   0   3   21.15   11.99
  -7   0   4  190.62   48.00
   7   0   4  145.67   48.02
  -7   0  -4  252.26   49.10
   7   0  -4  134.90   47.56
  -7   0  -5   12.61   12.30
   7   0  -5    6.09    9.83
  -7   0   5   -3.34   10.44
   7   0   5   10.86   11.73
   7   0   6  370.29   90.22
  -7   0   6  366.17   89.64
   7   0  -6  299.95   89.55
  -7   0   7   12.86   10.18
   7   0   7   -8.34   12.45
   7   0  -7    9.09   10.38
  -7   0  -8  659.90  114.39
   7   0  -8  310.89  112.79
   7   0   8  434.30  113.61
  -7   0   8  394.49  112.72
  -7   0   9   -1.86   10.50
   7   0  -9    5.14   11.21
  -7   0  -9    7.83   10.19
   7   0   9   19.85   13.94
  -7   0  -9   24.39   13.83
  -7   0 -10  264.40   56.98
  -7   0  10  152.39   55.12
   7   0 -10  140.55   55.37
  -7   0 -10  280.39   55.54
  -7   0 -11    6.37   11.24
  -7   0 -11    1.98   13.57
   7   0 -11    0.78   11.56
  -7   0  11   16.65   10.31
   7   0 -12   37.90   22.48
  -7   0 -12  101.47   22.90
  -7   0 -12   71.38   24.05
  -7   0 -13   14.31   12.62
   7   0 -13    9.19   13.21
  -7   0 -13   -9.43   15.42
  -7   0 -14   -1.08   15.50
  -7   0 -14    6.50   13.67
   7   0 -14   28.60   14.39
   8   0   0   14.32   14.78
  -8   0   0   44.24   15.65
   8   0  -1  298.03   94.38
  -8   0  -1  419.30   94.94
  -8   0   1  431.49   94.90
   8   0   1  292.64   94.38
  -8   0  -2    4.53   13.29
  -8   0   2    9.16   12.49
   8   0   2   22.24   13.03
   8   0  -2   10.15   12.19
  -8   0   3  213.71   45.81
  -8   0  -3  185.40   46.09
   8   0  -3  128.27   45.08
   8   0   3  126.36   45.24
   8   0  -4   -5.44   11.21
  -8   0  -4   -5.69   13.45
  -8   0   4    3.20   11.60
   8   0   4    0.86   12.28
   8   0  -5   45.30   22.07
  -8   0  -5   96.11   24.01
  -8   0   5   90.99   23.03
   8   0   5   47.07   23.25
   8   0   6   -0.92   13.96
  -8   0  -6  -11.93   14.59
  -8   0   6   -1.54   12.01
   8   0  -6    7.09   11.16
  -8   0   7   -6.04   11.69
   8   0  -7    7.17   11.26
   8   0   7    1.89   13.86
  -8   0   8    9.61   11.41
   8   0   8   11.72   14.21
   8   0  -8    4.05   11.88
   8   0  -9    9.08   15.22
  -8   0  -9   63.12   18.39
  -8   0   9   39.12   14.99
   8   0   9   25.29   18.04
   8   0 -10   -4.22   12.64
  -8   0 -10    3.29   15.26
  -8   0  10    0.71   11.61
   8   0  10   -2.10   15.32
  -8   0 -11  113.48   25.60
   8   0 -11   31.07   22.52
   8   0  11   60.90   24.99
  -9   0   0   11.97   14.02
   9   0   0   -0.91   12.82
   9   0   1  -16.62   13.78
   9   0  -1   23.39   12.82
  -9   0   1    8.80   14.33
  -9   0  -1    2.04   14.43
  -9   0   2   30.69   17.01
  -9   0  -2   45.71   17.40
   9   0   2   25.37   16.67
   9   0  -2   22.31   15.40
  -9   0  -3   11.66   15.15
   9   0  -3   -6.21   12.56
   9   0   3    8.63   13.93
  -9   0   3   10.35   13.86
  -9   0  -4  115.85   27.44
   9   0  -4   53.16   24.64
  -9   0   4   64.57   25.33
   9   0   4   83.29   26.28
   9   0   5   23.10   17.47
  -9   0   5   44.34   16.79
   9   0  -5    8.87   14.81
  -9   0  -5   34.29   18.00
   0  -1 -21    3.27   16.06
   0  -1 -20  235.65   63.24
   0  -1 -19    1.93   14.00
   0  -1 -18  128.34   51.27
   0  -1 -18  314.41   54.07
   0  -1 -17   -7.54    8.11
   0  -1 -17    9.31   12.13
   0   1  16  306.50   96.32
   0  -1 -16  552.27   98.08
   0  -1 -16  315.04   96.33
   0  -1 -15   -8.14    7.10
   0  -1 -15    9.50   11.14
   0   1  15    1.69    7.78
   0  -1 -14 1024.44  212.86
   0   1  14  810.05  211.96
   0  -1 -14  741.94  211.91
   0  -1 -13   -0.40    6.51
   0  -1 -13    3.72    9.19
   0   1  13    2.99    6.84
   0   1  12 1020.29  270.33
   0  -1 -12 1217.41  270.91
   0  -1 -12  997.38  270.36
   0  -1 -11    3.78    5.39
   0  -1 -11   -2.58    7.64
   0   1  11   -2.36    7.00
   0   1  11    5.18    5.88
   0  -1 -10  142.13   36.65
   0  -1 -10  121.13   36.00
   0   1  10  178.89   36.61
   0   1  10  137.36   36.01
   0   1   9   -0.82    4.79
   0  -1  -9   -4.98    6.06
   0  -1  -9   -1.44    5.05
   0   1   9   -6.18    6.44
   0   1   8   31.59    9.16
   0   1   8   22.05    8.18
   0  -1  -8   20.24    8.19
   0  -1  -8   33.35    9.25
   0   1   7   -1.11    4.16
   0  -1  -7    1.62    4.04
   0  -1  -7   -3.83    5.22
   0   1   7    5.12    5.27
   0   1   6   87.39   21.52
   0  -1  -6   71.98   21.51
   0  -1  -6   90.06   21.91
   0  -1  -5   -1.14    4.26
   0   1   5   -0.51    3.80
   0  -1  -5    0.71    3.45
   0  -1  -4  720.33  159.08
   0  -1  -4  578.94  158.93
   0   1   4  603.78  158.94
   0   1   3   -1.44    2.98
   0  -1  -3   -4.53    2.69
   0  -1  -2    2.21    1.83
   0  -1   1    0.26    1.11
   0   1  -3   -4.22    3.25
   0   1  -4 1217.58  326.50
   0  -1   4 1184.86  326.49
   0   1  -4 1842.13  326.83
   0  -1   5    0.60    2.93
   0   1  -5   -0.82    2.69
   0   1  -5   -5.09    4.27
   0   1  -6    6.36    5.16
   0  -1   6   -0.75    3.17
   0   1  -6    4.59    3.10
   0  -1   7   -0.91    5.13
   0   1  -7   -5.49    5.47
   0   1  -7   -1.99    3.40
   0  -1   7   -1.34    3.53
   0   1  -8  213.38   40.74
   0   1  -8  151.57   39.99
   0  -1   8  130.61   39.98
   0  -1   8  146.09   40.54
   0   1  -9    0.42    6.04
   0   1  -9   -1.64    3.99
   0  -1   9   -0.79    4.09
   0  -1   9    0.39    6.16
   0  -1  10   89.02   28.01
   0  -1  10  106.88   28.84
   0   1 -10  100.96   27.99
   0   1 -10  156.07   29.24
   0   1 -11   -3.84    4.71
   0  -1  11    1.43    7.09
   0   1 -11    5.72    7.80
   0  -1  11    5.63    5.00
   0   1 -12  444.72   76.51
   0   1 -12  256.29   75.18
   0  -1  12  252.64   75.23
   0  -1  13    4.06    6.08
   0   1 -13   -6.25    9.26
   0   1 -13   -3.66    5.47
   0   1 -14  739.54  247.63
   0  -1  14  929.35  247.75
   0  -1  15   -8.31    7.01
   0   1 -15   -5.88   11.54
   0   1 -15   -2.46    6.31
   0   1 -16  202.41   87.15
   0   1 -16  664.20   89.87
   0   1 -17  -10.22   12.01
   0   1 -17    1.96    6.32
   0   1 -18  182.22   49.56
   0   1 -19   -8.75   14.15
   0   1 -20   69.26   24.38
   0   1 -21   20.84   17.42
   1  -1 -21  285.56   70.63
  -1  -1 -21  240.93   70.51
  -1  -1 -20   43.34   18.32
   1  -1 -20   20.00   17.04
  -1  -1 -19  147.09   38.58
  -1  -1 -19  100.66   36.10
   1  -1 -19  174.73   38.75
  -1  -1 -18    3.73   13.22
  -1  -1 -18    0.59    8.96
   1  -1 -18   -4.74    7.50
   1  -1 -18    6.15   12.74
   1  -1 -17  101.74   21.51
  -1  -1 -17   76.72   21.31
   1  -1 -17   36.78   17.40
  -1  -1 -17   54.47   18.49
   1  -1 -16    7.36    6.19
  -1  -1 -16    1.08    8.40
   1  -1 -16   -7.63   11.54
  -1  -1 -16    7.32   12.08
   1  -1 -15   41.45   15.08
   1  -1 -15   81.24   18.32
  -1   1  15   54.34   15.69
   1   1  15   44.61   16.11
  -1  -1 -15   47.70   16.15
  -1  -1 -14   16.47    8.52
   1  -1 -14    9.12   10.35
   1  -1 -14    8.90    6.60
  -1   1  14   15.29    7.85
   1   1  14   10.33    8.58
   1  -1 -13  397.40   72.33
  -1  -1 -13  296.79   71.53
  -1   1  13  288.02   71.28
   1   1  13  265.21   71.39
   1  -1 -13  191.54   70.96
   1  -1 -12    5.75    5.55
   1   1  12   -1.19    7.25
  -1   1  12   16.46    8.28
   1  -1 -12   10.36    8.70
  -1   1  12    5.15    7.58
  -1  -1 -12   11.10    7.38
  -1   1  12   13.11    6.70
  -1   1  11  477.87  133.32
  -1   1  11  579.39  133.08
  -1  -1 -11  558.95  133.26
   1  -1 -11  298.83  132.78
   1   1  11  524.72  133.18
  -1   1  11  761.99  133.68
   1  -1 -11  714.88  133.75
   1   1  10   22.17    9.78
   1  -1 -10   16.75    8.79
  -1   1  10   20.72    9.89
  -1   1  10   43.99   10.62
  -1   1  10   34.08    9.35
  -1  -1 -10   34.67    9.99
   1  -1 -10   40.37   10.79
   1  -1  -9  852.72  376.43
  -1   1   9 2024.03  377.03
   1   1   9 1767.81  377.00
  -1   1   9 1261.85  376.70
   1  -1  -9 1921.64  377.09
   1   1   9 1590.70  376.77
  -1  -1  -9 1586.65  376.81
  -1   1   9 1718.72  376.68
   1  -1  -8  112.43   57.11
   1  -1  -8  285.97   57.79
  -1   1   8  306.53   57.74
   1   1   8  254.97   57.71
  -1   1   8  188.01   57.41
   1   1   8  252.04   57.55
  -1   1   8  247.17   57.35
  -1  -1  -8  235.31   57.56
   1   1   7 1866.53  376.82
   1   1   7 1651.93  376.64
  -1   1   7 1859.65  376.74
  -1   1   7 1241.13  376.53
  -1   1   7 1668.42  376.54
  -1  -1  -7 1670.65  376.68
   1  -1  -7 1798.82  376.75
   1  -1  -7  808.54  376.36
  -1   1   6  329.72   67.98
  -1   1   6  224.72   67.77
   1  -1  -6  144.07   67.61
   1   1   6  350.86   68.11
   1  -1  -6  318.30   67.99
  -1   1   6  278.46   67.78
   1   1   6  322.16   67.96
  -1  -1  -6  283.95   67.93
  -1   1   5 1596.07  357.38
  -1   1   5 1184.03  357.24
   1   1   5 1829.69  357.51
  -1   1   5 1215.58  357.27
   1  -1  -5 1693.08  357.42
  -1  -1  -5 1677.16  357.45
   1   1   5 1645.45  357.43
   1  -1  -5  976.52  357.19
  -1  -1  -4 1201.05  234.47
   1   1   4 1074.10  234.41
   1   1   4 1244.92  234.46
  -1   1   4 1096.53  234.34
   1  -1  -4  642.28  234.20
  -1   1   4  781.64  234.23
  -1   1   4  587.16  234.18
   1  -1  -4 1113.80  234.35
  -1  -1  -4 1056.42  234.41
   1   1   3   18.95    4.98
   1  -1  -3    8.52    4.25
  -1   1   3   11.74    4.38
  -1  -1  -3    9.29    4.82
  -1   1   3   13.07    4.20
  -1   1   3   10.05    4.37
  -1  -1  -3   15.71    4.64
   1  -1  -3    9.95    4.22
  -1   1   2    8.06    6.31
  -1   1   2   19.39    6.08
  -1  -1  -2   33.19    6.47
  -1   1   2   16.37    6.20
   1  -1  -2   24.11    6.06
   1   1   2   33.61    6.54
   1   1   1   14.58    4.62
  -1   1   1   13.18    4.20
   1  -1  -1   18.76    4.66
   1   1   1   16.60    4.26
  -1   1   1   13.34    4.14
   1  -1  -1   13.84    4.05
   1  -1  -1   10.76    4.09
  -1   1   0   11.16    3.48
  -1  -1   0   14.24    3.42
   1   1   0    4.27    3.20
   1  -1   0   13.00    3.43
   1   1   0   16.15    3.75
  -1  -1   0   10.87    3.69
   1   1  -1  305.97   74.88
  -1   1  -1  313.23   75.01
   1   1  -1  282.39   74.90
  -1   1  -1  311.06   74.94
  -1  -1   1  275.95   74.90
   1  -1   1  304.11   74.94
  -1  -1   1  285.88   74.88
   1   1  -2   94.99   25.05
  -1   1  -2  107.63   25.28
  -1  -1   2   90.16   25.05
  -1   1  -2  110.87   25.28
   1   1  -2   95.30   25.14
   1  -1   2  106.72   25.29
   1  -1   2  114.39   25.33
  -1  -1   2  105.11   25.16
   1   1  -2   78.15   25.24
  -1   1  -3 3138.62  730.73
   1  -1   3 2854.16  730.73
  -1   1  -3 3147.73  730.77
   1   1  -3 2399.03  730.71
   1  -1   3 3005.12  730.72
  -1  -1   3 2832.06  730.67
   1   1  -3 2863.59  730.67
  -1   1  -4  237.21   55.97
  -1   1  -4  233.15   56.09
   1   1  -4  198.92   56.01
  -1  -1   4  207.63   55.93
   1  -1   4  215.57   55.95
   1   1  -4  225.63   55.95
   1  -1   4  211.17   56.04
  -1  -1   5  864.26  249.42
   1   1  -5 1326.37  249.82
   1   1  -5  752.22  249.40
   1  -1   5 1249.87  249.87
  -1  -1   5 1221.03  249.77
   1  -1   5 1245.61  249.71
  -1   1  -5 1386.36  249.78
   1   1  -5 1185.22  249.87
  -1  -1   5  944.93  249.75
   1   1  -6  569.71  100.69
   1  -1   6  484.39  100.70
  -1   1  -6  562.25  100.57
  -1  -1   6  380.66  100.57
   1   1  -6  273.43  100.11
   1  -1   6  476.22  100.47
  -1  -1   6  483.15  100.60
  -1  -1   6  359.62  100.15
   1  -1   7 2348.78  502.60
   1   1  -7 3069.83  502.95
  -1  -1   7 2371.80  502.74
  -1  -1   7 2058.90  502.73
   1  -1   7 2366.83  502.83
  -1  -1   7 1875.50  502.32
  -1   1  -7 2707.73  502.69
   1   1  -7 1324.63  502.27
  -1  -1   8  114.98   29.46
   1  -1   8  143.74   30.45
   1   1  -8  171.78   30.44
  -1  -1   8  115.31   30.16
  -1   1  -8  155.90   30.01
   1  -1   8  129.04   29.87
  -1  -1   8  127.70   30.21
   1   1  -8   61.29   29.31
   1   1  -9 1932.53  288.69
   1   1  -9  563.67  287.60
   1  -1   9 1393.99  288.06
  -1  -1   9 1357.36  288.30
   1  -1   9 1391.91  288.39
  -1  -1   9 1254.26  288.29
  -1  -1   9 1182.98  287.75
  -1   1  -9 1493.70  288.14
  -1  -1  10   12.00    7.14
   1   1 -10   25.89    8.09
   1  -1  10    7.85    5.99
  -1  -1  10   10.10    4.79
  -1   1 -10   11.64    6.07
   1   1 -10    5.76    4.40
  -1  -1  10   12.49    7.17
  -1  -1  11  396.08   97.08
  -1   1 -11  466.72   96.79
  -1  -1  11  378.21   96.38
   1   1 -11  667.24   97.71
   1   1 -11  193.90   96.17
   1  -1  11  441.91   96.74
  -1  -1  11  426.30   97.11
  -1  -1  12    2.17    5.32
   1   1 -12   20.29    8.99
   1  -1  12   15.48    6.96
  -1   1 -12    5.71    6.89
  -1  -1  12   13.54    8.44
   1   1 -12    6.07    4.71
   1  -1  13   61.81   15.10
  -1   1 -13   58.08   14.98
  -1  -1  13   48.73   14.33
   1   1 -13   26.11   13.81
  -1   1 -14    6.92    7.36
   1   1 -14   11.79   10.01
  -1  -1  14   -0.51    5.77
   1   1 -14   -0.27    4.69
   1  -1  14    6.87    7.06
  -1   1 -15    7.60   11.36
   1  -1  15   13.33    8.02
   1   1 -15   35.51   11.83
  -1   1 -15   14.23    7.83
   1   1 -15    5.43    6.04
  -1  -1  15   10.93    6.92
   1   1 -16   -0.91    5.43
   1   1 -16   -5.37   11.64
  -1   1 -16    1.36    7.56
  -1   1 -16   -9.00   12.35
  -1   1 -17   26.67   12.72
   1   1 -17   32.98   16.17
  -1   1 -17   62.32   17.35
  -1   1 -18   29.09   14.36
  -1   1 -18   -4.47    8.39
   1   1 -18    8.83   13.08
   1   1 -19  175.41   48.77
  -1   1 -19  182.02   49.03
   1   1 -20   23.10   15.68
  -1   1 -20   22.32   16.97
  -1   1 -21  212.89   55.85
   1   1 -21  192.95   55.59
   2  -1 -20   55.22   17.98
  -2  -1 -20    8.68   13.93
  -2  -1 -19   -6.99   11.18
   2  -1 -19   13.64   13.97
  -2  -1 -18  191.12   64.11
   2  -1 -18  313.90   65.51
   2  -1 -17   27.16   13.08
  -2  -1 -17   21.29   14.11
   2  -1 -17   55.50   16.92
   2  -1 -16  674.71  123.07
  -2  -1 -16  468.99  122.19
   2  -1 -16  282.13  121.44
  -2  -1 -16  661.05  123.40
  -2  -1 -15   86.45   22.09
  -2   1  15   46.40   20.66
   2  -1 -15   33.59   20.40
   2  -1 -15   99.47   22.93
   2  -1 -14  151.75   56.41
  -2   1  14  151.66   56.42
  -2  -1 -14  304.05   58.33
   2  -1 -14  298.51   57.93
  -2  -1 -14  261.05   57.43
  -2  -1 -13   99.31   19.12
   2   1  13   53.11   16.97
  -2   1  13   41.68   15.69
   2  -1 -13   55.68   17.54
  -2  -1 -13   78.90   17.45
   2  -1 -13   28.94   15.49
  -2  -1 -12  191.98   43.09
  -2   1  12  128.48   42.64
  -2   1  12  100.73   42.25
   2  -1 -12  229.71   43.44
   2  -1 -12  117.73   42.32
  -2  -1 -12  200.79   43.71
   2   1  12  179.42   42.95
  -2   1  12  206.44   43.12
   2  -1 -11   27.64   17.09
  -2   1  11   41.43   17.13
  -2   1  11   79.80   18.09
  -2  -1 -11   61.66   18.09
  -2   1  11   51.18   17.56
   2  -1 -11   85.32   18.41
   2   1  11   68.40   18.19
   2   1  11   92.34   18.69
  -2  -1 -11  102.30   19.29
   2  -1 -10   70.85   42.06
  -2   1  10  132.36   42.44
  -2   1  10  196.00   42.76
  -2   1  10  124.83   42.20
   2   1  10  184.88   42.79
  -2  -1 -10  226.19   43.29
   2   1  10  262.80   43.26
  -2  -1 -10  208.03   43.02
   2  -1 -10  193.15   42.83
  -2   1   9   -0.53    4.64
   2   1   9   -3.08    6.35
   2  -1  -9    0.75    5.93
  -2   1   9    3.85    6.00
   2   1   9    5.07    6.38
   2  -1  -9    0.83    4.76
  -2   1   9   -0.70    5.21
  -2  -1  -9    4.57    6.63
  -2  -1  -9    3.72    6.30
   2  -1  -8   20.26   12.42
  -2  -1  -8   55.76   13.41
  -2   1   8   49.87   13.01
   2  -1  -8   56.40   13.28
  -2  -1  -8   69.21   13.98
   2   1   8   65.11   13.59
  -2   1   8   35.82   12.82
   2   1   8   62.59   13.55
  -2   1   8   22.07   12.37
  -2   1   7  238.48   51.62
   2  -1  -7  105.59   51.27
  -2   1   7  122.82   51.28
  -2   1   7  142.81   51.41
   2   1   7  275.05   51.92
   2   1   7  243.56   51.82
  -2  -1  -7  268.32   51.96
   2  -1  -7  247.88   51.68
  -2  -1  -7  267.21   51.95
  -2  -1  -6  558.20  107.83
  -2  -1  -6  511.24  107.82
  -2   1   6  423.81  107.48
   2   1   6  508.29  107.71
   2   1   6  470.02  107.71
   2  -1  -6  474.14  107.55
  -2   1   6  298.99  107.40
  -2   1   6  270.24  107.33
   2  -1  -6  361.68  107.48
  -2   1   5    3.78    4.37
  -2   1   5    6.55    4.58
   2  -1  -5   10.13    4.45
  -2   1   5   11.62    4.47
   2  -1  -5    3.52    4.66
  -2   1   5    3.17    4.51
  -2  -1  -5    5.46    5.64
  -2  -1  -5   13.78    5.26
   2   1   5    8.04    5.52
   2   1   5   17.93    5.30
   2  -1  -4 1459.74  421.72
   2   1   4 2027.11  421.86
  -2   1   4 1647.20  421.79
  -2  -1  -4 1863.14  421.97
  -2   1   4 1452.92  421.71
  -2  -1  -4 2182.46  421.93
  -2   1   4 1045.07  421.67
  -2   1   4 1774.54  421.69
  -2   1   4 1792.82  421.70
  -2   1   3   20.03    6.44
  -2   1   3   20.53    6.08
   2   1   3   21.92    6.46
  -2   1   3   22.67    6.80
  -2  -1  -3   18.42    6.40
   2  -1  -3   16.69    6.26
  -2   1   3   20.22    6.07
   2  -1  -2  997.39  263.18
   2  -1  -2  931.54  263.08
  -2   1   2  961.53  263.09
  -2   1   2 1058.56  263.20
   2   1   2 1131.12  263.08
   2   1   2 1082.53  263.24
  -2   1   2  959.90  262.97
  -2  -1  -2 1237.18  263.11
   2  -1  -1  225.16   56.82
   2   1   1  257.68   56.59
   2   1   1  238.90   56.88
   2   1   1  246.54   56.59
  -2   1   1  232.87   56.85
   2  -1  -1  227.85   56.71
  -2  -1  -1  236.64   56.86
   2   1   1  221.48   56.83
  -2   1   1  205.96   56.49
  -2   1   1  220.45   56.70
   2  -1  -1  190.32   56.48
   2   1   0 1331.49  317.58
   2  -1   0 1140.75  317.31
   2  -1   0 1337.26  317.58
   2  -1   0 1096.09  317.45
  -2  -1   0 1448.61  317.57
   2   1   0 1331.84  317.53
  -2   1   0 1318.11  317.33
   2   1   0 1222.17  317.30
  -2  -1   1  761.91  212.14
   2   1  -1  790.53  212.06
   2   1  -1  771.98  212.15
   2  -1   1  825.10  211.97
  -2   1  -1  908.56  211.99
  -2  -1   1  883.03  212.12
   2   1  -2  816.22  202.68
  -2  -1   2  760.14  202.52
   2  -1   2  866.04  202.68
  -2   1  -2  910.27  202.70
   2   1  -2  765.61  202.52
  -2   1  -2  884.44  202.88
  -2  -1   2  828.34  202.70
   2   1  -2  730.35  202.79
  -2  -1   2  698.14  202.77
   2  -1   3   18.07    6.48
  -2  -1   3   15.59    5.64
  -2  -1   3   17.22    5.27
  -2   1  -3   19.89    6.64
   2   1  -3   20.94    5.29
   2  -1   3   15.48    5.84
   2   1  -3    8.06    5.96
  -2   1  -3   23.94    6.07
   2   1  -3   16.43    5.54
  -2  -1   3    9.99    6.30
   2   1  -4  210.80   51.81
   2   1  -4  174.35   52.02
   2   1  -4  202.74   51.76
   2  -1   4  201.98   52.05
   2  -1   4  218.68   52.02
  -2  -1   4  196.18   51.79
  -2   1  -4  228.89   52.07
  -2  -1   4  199.28   51.77
  -2   1  -4  245.32   52.19
  -2  -1   4  133.75   51.94
  -2  -1   5   71.42   18.45
  -2  -1   5   88.01   18.79
  -2   1  -5   95.50   19.18
   2   1  -5   60.90   19.04
   2  -1   5   74.97   19.01
  -2  -1   5   30.33   18.34
   2  -1   5   72.57   18.98
  -2  -1   5   59.73   19.01
  -2   1  -5  100.21   19.20
   2   1  -5   82.37   18.73
   2   1  -6  192.98   47.03
  -2  -1   6  140.37   46.86
   2   1  -6  203.45   46.85
   2  -1   6  221.67   47.02
  -2  -1   6  184.26   46.77
  -2  -1   6  114.27   46.43
  -2   1  -6  251.61   47.17
  -2   1  -6  242.53   47.16
   2  -1   6  211.12   47.05
  -2  -1   6  167.66   46.51
   2  -1   7  120.33   28.86
   2   1  -7  116.05   29.00
  -2  -1   7   73.04   28.14
  -2   1  -7  145.00   29.00
   2   1  -7  126.05   28.80
  -2   1  -7  152.74   29.25
  -2  -1   7  116.70   28.67
   2  -1   7  133.96   29.07
  -2  -1   7   98.01   28.23
  -2  -1   7   84.11   28.78
  -2  -1   8  126.47   50.91
   2   1  -8  205.54   51.70
  -2   1  -8  254.32   51.69
  -2   1  -8  278.37   51.90
  -2  -1   8  228.73   51.49
   2  -1   8  222.95   51.71
   2   1  -8  249.74   51.59
  -2  -1   8  156.65   51.45
  -2  -1   8  172.58   50.96
   2  -1   8  244.86   51.61
   2  -1   9   11.49    8.23
  -2  -1   9   11.07    8.48
  -2   1  -9   25.24    8.48
  -2  -1   9   30.55    6.89
   2   1  -9    9.74    8.30
   2  -1   9   37.65    9.23
  -2  -1   9   17.21    8.27
  -2   1  -9   29.64    9.52
  -2  -1   9   15.09    6.65
   2   1 -10  483.07   95.62
   2  -1  10  463.45   95.72
  -2  -1  10  432.53   95.47
  -2   1 -10  469.93   95.55
  -2   1 -10  536.26   95.98
  -2  -1  10  281.09   94.78
  -2  -1  10  280.58   94.79
  -2  -1  10  328.04   95.38
   2  -1  10  421.54   95.40
  -2   1 -11   21.47    8.29
  -2  -1  11   21.44    8.09
  -2  -1  11   -1.95    7.58
  -2  -1  11    8.56    5.47
  -2   1 -11   10.18    9.09
   2   1 -11   13.72    8.04
   2  -1  11   14.52    7.53
  -2  -1  12  576.84  153.30
   2   1 -12  827.03  153.68
  -2  -1  12  383.84  152.57
   2  -1  12  633.54  153.19
  -2   1 -12  819.65  153.92
  -2   1 -12  663.32  153.29
   2  -1  13   65.66   21.49
   2   1 -13  103.70   22.51
  -2  -1  13   47.42   20.29
  -2   1 -13  133.24   23.49
  -2   1 -13   73.56   21.89
  -2   1 -14  367.10   84.02
  -2   1 -14  485.33   85.16
   2   1 -14  419.17   84.59
  -2  -1  14  200.27   83.07
   2  -1  14  334.70   83.87
  -2   1 -15  127.86   36.85
   2  -1  15  105.82   36.57
  -2   1 -15  154.77   38.13
   2   1 -15  160.06   37.67
   2   1 -16  401.55   92.44
  -2   1 -16  407.71   92.74
  -2   1 -16  289.62   91.56
   2   1 -17   50.97   19.37
  -2   1 -17   55.85   17.16
  -2   1 -18  148.73   47.95
   2   1 -18  231.45   49.65
   2   1 -19   33.77   16.83
   2   1 -20   62.23   22.61
  -3  -1 -20   61.06   19.78
  -3  -1 -20   22.03   15.76
  -3  -1 -19   57.69   21.09
  -3  -1 -19   95.26   23.89
   3  -1 -19   41.16   21.65
  -3  -1 -18   18.70   14.99
  -3  -1 -18   24.40   12.11
   3  -1 -18  -17.19   14.01
  -3  -1 -17    8.08   11.59
  -3  -1 -17   36.91   15.39
   3  -1 -17   -1.52   12.60
   3  -1 -16    3.54   11.10
  -3   1  16   -4.06    7.19
  -3  -1 -16   -7.76   10.83
  -3  -1 -16    6.04   12.14
  -3   1  15    7.51    7.83
  -3  -1 -15   15.54   10.69
  -3  -1 -15   16.88   12.55
   3  -1 -15   13.70   10.59
  -3  -1 -14   18.73   10.26
  -3   1  14   16.63    7.93
   3  -1 -14   19.78   10.55
  -3   1  14   -0.77    7.66
  -3  -1 -14   34.33   12.36
   3  -1 -13   57.45   14.21
  -3  -1 -13   80.02   16.03
  -3   1  13    8.52   12.29
  -3   1  13   18.87   11.98
  -3  -1 -13   54.83   14.32
  -3   1  12  257.43   59.65
   3  -1 -12  287.81   59.96
  -3   1  12  134.31   59.02
  -3   1  12  145.44   58.99
  -3   1  12  121.86   59.20
  -3  -1 -12  401.32   60.97
  -3  -1 -12  334.94   60.45
  -3   1  11  442.83  187.68
  -3   1  11  799.54  188.14
  -3  -1 -11 1292.95  189.16
   3  -1 -11  875.22  188.29
  -3  -1 -11 1048.23  188.76
  -3   1  11  423.67  187.84
  -3   1  11  508.22  187.78
  -3   1  10  221.38   78.37
   3   1  10  391.05   79.12
  -3   1  10  298.86   78.59
   3   1  10  463.23   79.26
   3  -1 -10  315.73   78.70
  -3  -1 -10  405.75   79.27
  -3   1  10  151.24   78.31
  -3   1  10  156.02   78.18
  -3  -1 -10  486.50   79.51
  -3   1   9  264.76  130.36
  -3   1   9  261.61  130.26
  -3  -1  -9  658.30  131.13
  -3   1   9  377.56  130.44
  -3  -1  -9  840.16  131.42
  -3   1   9  495.14  130.57
   3   1   9  786.22  131.18
   3   1   9  694.17  131.13
   3  -1  -9  426.80  130.67
   3  -1  -9  556.27  130.66
  -3  -1  -8  276.24   56.23
  -3   1   8  186.22   55.55
   3   1   8  313.53   56.09
   3  -1  -8  172.58   55.71
  -3  -1  -8  303.07   56.24
  -3   1   8  220.25   55.55
  -3   1   8  128.41   55.32
   3   1   8  270.25   56.09
  -3   1   8  136.51   55.46
   3   1   7  780.95  135.10
  -3   1   7  427.45  134.63
   3  -1  -7  449.33  134.72
  -3  -1  -7  686.51  135.23
  -3  -1  -7  747.48  135.16
  -3   1   7  349.99  134.52
  -3   1   7  332.78  134.57
   3   1   7  655.03  135.11
  -3   1   7  505.28  134.58
  -3  -1  -6  607.82  106.93
  -3   1   6  205.30  106.33
  -3   1   6  367.05  106.54
  -3   1   6  412.81  106.40
   3   1   6  575.07  106.83
  -3  -1  -6  505.26  106.98
   3   1   6  526.91  106.97
   3  -1  -6  344.69  106.53
  -3   1   6  419.09  106.43
  -3   1   6  311.03  106.48
  -3   1   5  887.61  209.15
   3  -1  -5  689.60  209.28
  -3   1   5  830.41  209.38
  -3   1   5  729.70  209.29
   3   1   5 1068.74  209.45
  -3   1   5  807.14  209.15
  -3  -1  -5  998.36  209.70
  -3  -1  -5 1106.51  209.54
  -3   1   5  357.78  209.09
   3  -1  -4   78.41   23.02
  -3   1   4   89.56   22.57
  -3   1   4   69.47   22.95
  -3  -1  -4  115.62   23.09
   3  -1  -4   68.39   22.96
  -3   1   4   81.15   22.58
   3   1   4  103.14   22.97
  -3   1   4   86.62   23.13
   3   1   3  588.10  124.09
  -3   1   3  435.54  124.11
   3   1   3  657.01  124.51
  -3   1   3  451.43  123.82
  -3   1   3  437.11  123.83
  -3   1   3  508.75  124.26
  -3  -1  -3  647.65  124.15
   3  -1  -3  405.51  124.10
   3  -1  -3  483.52  124.22
   3   1   2   79.86   16.12
  -3   1   2   72.86   16.49
   3  -1  -2   67.63   16.64
  -3  -1  -2   73.63   16.82
  -3   1   2   53.94   15.64
  -3   1   2   73.96   16.68
  -3   1   2   55.89   15.63
   3   1   2   72.21   16.78
   3  -1  -2   65.41   16.54
   3   1   2   72.64   16.94
   3  -1  -1    2.28    4.84
   3   1   1   -1.02    2.80
   3  -1  -1    5.74    1.56
  -3  -1  -1    3.34    5.06
  -3   1   1    2.40    1.69
  -3   1   1   -2.96    4.75
   3   1   1    4.32    6.00
   3   1   1   10.36    5.08
  -3   1   1    4.21    4.91
   3  -1  -1    5.23    4.67
   3   1   1    1.70    2.70
  -3  -1   0   13.40    5.95
   3   1   0    2.71    5.20
   3  -1   0    2.05    5.39
   3  -1   0    3.69    5.08
   3   1   0    5.53    2.44
  -3   1   0    5.33    2.84
   3   1   0   12.03    2.31
  -3  -1   0    1.42    5.41
  -3   1   0   12.67    5.46
   3   1   0    3.79    5.01
   3  -1   0    4.61    2.68
   3  -1   1   52.91   17.76
   3   1  -1   86.00   18.49
   3   1  -1   61.77   17.72
  -3   1  -1   64.89   17.18
  -3  -1   1   76.61   17.84
   3  -1   1   63.49   17.15
  -3  -1   1   65.29   17.92
   3  -1   1   63.09   17.92
   3   1  -2  144.62   38.73
  -3   1  -2  157.35   38.54
   3  -1   2  153.01   38.54
  -3  -1   2  131.07   38.90
   3   1  -2  145.42   38.93
  -3  -1   2  153.62   38.81
   3   1  -3  401.47  112.04
   3   1  -3  511.98  112.74
   3   1  -3  459.91  112.38
  -3   1  -3  526.84  112.74
  -3  -1   3  398.67  112.04
  -3  -1   3  504.29  112.45
  -3  -1   3  429.92  112.53
  -3   1  -3  558.08  112.42
   3  -1   3  495.00  112.36
   3   1  -4  307.68   98.88
  -3  -1   4  324.64   98.89
   3  -1   4  420.02   98.83
   3   1  -4  366.57   98.72
   3   1  -4  400.58   98.55
  -3  -1   4  374.46   98.77
  -3  -1   4  369.64   98.53
  -3   1  -4  454.31   99.12
  -3   1  -4  442.73   98.88
   3  -1   4  394.83   99.04
   3   1  -5  860.65  209.23
  -3  -1   5  834.09  209.21
  -3  -1   5  776.45  209.30
   3   1  -5  680.61  209.49
  -3  -1   5  578.06  209.40
   3  -1   5  907.00  209.49
  -3   1  -5  959.13  209.74
   3   1  -5  766.76  209.28
  -3   1  -5  975.10  209.56
   3  -1   5  849.00  209.62
  -3   1  -6  249.17   44.32
  -3  -1   6  168.30   43.73
  -3   1  -6  234.23   44.44
   3   1  -6  192.10   43.76
   3   1  -6  160.82   44.18
   3  -1   6  220.20   44.15
  -3  -1   6  187.97   43.73
  -3  -1   6  106.74   43.97
   3  -1   6  199.91   44.32
  -3  -1   6   23.62   43.40
  -3   1  -7  374.35   69.66
  -3  -1   7  239.81   68.95
   3  -1   7  300.41   69.41
  -3  -1   7  293.35   69.09
  -3  -1   7  153.65   69.16
   3  -1   7  299.10   69.53
  -3   1  -7  340.85   69.68
   3   1  -7  209.66   69.32
   3   1  -7  324.53   69.19
  -3  -1   7  189.33   68.85
  -3  -1   8  116.00   55.84
   3  -1   8  265.52   56.75
  -3  -1   8  196.32   56.00
  -3  -1   8  222.02   56.26
  -3   1  -8  298.08   56.97
  -3   1  -8  322.02   56.99
   3   1  -8  196.83   56.60
   3  -1   8  254.32   56.64
   3   1  -8  278.69   56.43
  -3  -1   8  145.15   56.32
  -3   1  -9  262.40   48.32
  -3  -1   9   97.43   46.93
   3   1  -9  256.14   47.78
   3  -1   9  215.29   47.98
  -3  -1   9  146.94   47.08
   3  -1   9  214.41   47.93
  -3   1  -9  275.07   48.38
  -3  -1   9  100.90   47.45
  -3  -1   9  208.96   47.54
   3   1  -9  158.73   47.84
   3   1 -10  192.44   55.75
  -3  -1  10  166.22   54.84
  -3  -1  10  230.43   55.39
  -3   1 -10  301.03   56.06
   3  -1  10  261.89   55.88
   3  -1  10  245.25   55.74
   3   1 -10  284.61   55.63
  -3   1 -10  324.37   56.30
  -3  -1  10  125.89   54.75
  -3  -1  10  137.86   55.35
  -3  -1  11  203.49   48.61
  -3  -1  11  113.58   47.79
  -3   1 -11  242.93   49.16
  -3   1 -11  290.76   49.60
  -3  -1  11  134.18   47.84
   3  -1  11  205.40   48.82
   3   1 -11  265.55   48.95
  -3   1 -12   69.15   17.22
  -3  -1  12   38.19   14.74
   3  -1  12   53.52   16.68
   3   1 -12   80.48   17.02
  -3  -1  12   38.99   14.70
  -3  -1  12   56.07   16.39
  -3   1 -12   81.59   17.89
   3   1 -13  118.43   21.86
  -3   1 -13  100.92   21.63
  -3   1 -13  110.16   22.57
  -3  -1  13   44.19   19.29
  -3  -1  13   57.34   19.37
  -3   1 -14    2.38    9.20
  -3  -1  14   -3.24    5.35
  -3   1 -14   -0.75   10.68
   3   1 -14   -6.01    9.85
  -3   1 -15  -12.17   12.23
  -3   1 -15   -0.62    9.61
   3   1 -15    3.92   10.25
  -3  -1  15    2.33    5.14
  -3   1 -16   12.18   13.10
   3   1 -16   21.25   11.31
  -3   1 -16  -10.35   10.46
   3   1 -17   94.75   29.32
  -3   1 -17  127.41   30.67
  -3   1 -17   88.63   28.85
   3   1 -18   41.84   17.38
  -3   1 -18   62.48   19.14
  -3   1 -18   27.11   15.81
   3   1 -19   66.70   19.81
  -3   1 -19   20.80   17.32
  -3   1 -19   67.47   21.31
  -3   1 -20   52.52   21.92
   3   1 -20   45.83   19.75
  -4  -1 -19  181.00   43.61
  -4   1  19  166.03   42.51
  -4  -1 -19  117.49   42.12
  -4  -1 -18  175.47   41.02
  -4   1  18  129.36   39.61
  -4  -1 -18  127.63   39.51
  -4  -1 -17  199.15   60.56
  -4  -1 -17  264.26   61.52
  -4  -1 -16  205.68   62.88
  -4  -1 -16  278.33   63.67
  -4  -1 -15  191.97   32.72
  -4  -1 -15  156.30   31.40
  -4  -1 -14  263.88   46.73
  -4  -1 -14  240.88   46.19
  -4   1  13   21.67   19.34
  -4   1  13   47.73   19.71
  -4   1  13   77.23   20.37
  -4  -1 -13  131.74   22.60
  -4  -1 -13   92.05   21.79
  -4   1  12  119.58   68.41
  -4  -1 -12  382.27   70.05
  -4   1  12  305.93   69.02
  -4   1  12  186.33   68.62
  -4  -1 -12  419.20   70.27
  -4  -1 -11  223.20   42.19
  -4   1  11   71.18   40.42
  -4   1  11  114.91   40.76
  -4  -1 -11  266.24   42.29
  -4   1  11  173.49   41.01
  -4   1  11   79.61   40.69
  -4   1  10   43.75   14.15
   4  -1 -10   28.13   14.65
  -4  -1 -10   62.58   16.09
  -4   1  10   50.78   14.41
  -4   1  10   43.66   14.38
  -4   1  10   15.14   13.48
  -4  -1 -10   88.96   16.12
  -4   1  10   35.58   14.23
  -4  -1  -9   48.43   10.91
  -4  -1  -9   34.80    9.87
  -4   1   9   -1.20    6.89
  -4   1   9    1.46    6.86
   4  -1  -9    0.46    8.30
  -4   1   9    7.30    7.62
  -4   1   9   14.76    7.97
   4   1   9   47.26    9.21
  -4   1   9  -10.23    8.08
  -4   1   8    0.54    5.86
  -4   1   8    0.38    6.28
   4  -1  -8    2.14    6.99
  -4  -1  -8   10.71    7.57
  -4   1   8    3.62    5.31
  -4   1   8    2.53    5.77
   4   1   8   -0.83    6.69
  -4   1   8    1.20    6.44
  -4  -1  -8   11.98    9.15
  -4   1   7   19.89    7.96
  -4   1   7    4.49    8.48
  -4  -1  -7   47.51    9.82
   4  -1  -7   11.60    8.69
  -4   1   7   16.35    7.53
   4   1   7   41.75   10.48
  -4  -1  -7   29.36   10.17
  -4   1   7   18.71    8.97
  -4   1   7    2.86    8.14
   4   1   7   48.17    9.43
   4  -1  -6   33.08   13.76
   4   1   6   91.20   14.33
  -4   1   6   14.99   13.61
  -4  -1  -6   79.03   14.36
  -4   1   6   30.84   13.95
  -4   1   6   36.72   13.12
  -4   1   6   42.67   13.93
  -4  -1  -6   71.51   15.28
  -4   1   6   46.96   13.04
  -4   1   5  112.76   40.51
  -4   1   5  171.83   40.58
  -4  -1  -5  270.30   41.40
  -4   1   5  163.67   41.34
  -4   1   5  126.02   41.03
   4  -1  -5  125.49   41.13
   4   1   5  242.37   41.25
   4  -1  -5  106.19   40.98
  -4   1   4  288.36   77.96
  -4   1   4  257.90   77.37
   4   1   4  595.53   78.14
  -4  -1  -4  569.65   78.16
  -4   1   4  350.59   78.21
   4   1   4  505.92   78.71
   4  -1  -4  298.31   78.04
   4  -1  -4  237.17   77.91
  -4   1   4  242.85   77.38
   4  -1  -3 1077.43  304.44
  -4   1   3 1222.63  304.55
   4   1   3 1301.80  304.64
   4   1   3 1293.97  304.69
  -4  -1  -3 1290.09  304.70
   4  -1  -3  919.66  304.32
   4   1   3 1390.63  304.24
  -4   1   3 1031.36  304.34
  -4   1   2  735.02  215.76
   4   1   2  954.74  216.02
   4   1   2  882.98  215.89
  -4   1   2  664.25  215.62
   4  -1  -2  564.13  215.56
   4   1   2  980.95  215.43
   4  -1  -2  663.64  215.68
   4   1   2  992.09  215.46
  -4  -1  -2  887.61  215.96
   4   1   1  685.63  159.64
  -4   1   1  535.31  160.12
   4  -1  -1  449.00  159.99
   4  -1  -1  350.79  159.87
   4   1   1  633.75  160.16
   4   1   1  673.76  159.62
  -4  -1  -1  625.37  160.23
   4   1   1  746.34  160.35
  -4  -1   0  856.13  135.47
   4  -1   0  405.12  134.40
  -4   1   0  723.59  135.38
   4   1   0  883.56  135.55
   4   1   0  873.52  135.41
   4  -1   0  587.56  135.09
  -4   1   0  504.19  134.43
   4  -1   0  667.21  135.23
   4   1  -1  590.62  108.31
   4  -1   1  319.31  107.56
   4  -1   1  320.56  108.02
  -4   1  -1  445.70  108.30
  -4  -1   1  520.66  108.29
  -4   1  -1  415.13  107.61
   4   1  -1  642.11  108.53
   4  -1   1  366.49  108.10
  -4  -1   1  530.58  108.35
   4  -1   2  387.75  121.19
   4   1  -2  582.79  121.43
   4   1  -2  587.72  121.26
  -4  -1   2  557.19  121.32
  -4   1  -2  480.73  120.81
  -4  -1   2  517.79  121.31
   4  -1   2  383.96  120.74
   4  -1   2  402.94  121.22
  -4  -1   3  420.19  113.96
   4   1  -3  472.52  114.04
  -4   1  -3  470.71  113.62
  -4  -1   3  437.49  113.85
   4   1  -3  483.34  113.85
   4  -1   3  396.95  113.56
  -4  -1   4  141.57   25.01
   4   1  -4  251.39   26.09
  -4  -1   4   58.35   23.55
   4   1  -4  226.77   25.22
  -4   1  -4  129.19   24.61
  -4  -1   4  160.58   25.76
   4  -1   4   84.20   24.26
  -4   1  -4  120.27   25.38
   4   1  -5  425.26   93.30
   4   1  -5  384.24   93.70
   4  -1   5  336.72   93.63
  -4   1  -5  390.67   94.15
  -4  -1   5  367.80   93.73
   4  -1   5  328.98   93.96
   4   1  -5  308.57   93.86
  -4   1  -5  405.85   93.74
  -4  -1   5  310.50   93.87
  -4  -1   5  319.54   93.24
  -4  -1   6    5.07    8.84
  -4  -1   6    9.90    7.90
  -4  -1   6    9.06    6.76
   4   1  -6   41.37    8.11
   4   1  -6   32.84    9.40
   4  -1   6    8.43    9.02
  -4   1  -6   11.05    8.35
  -4   1  -6    9.18    9.45
   4   1  -6   53.44    7.35
   4  -1   6   -3.36    8.26
  -4  -1   7    8.89    8.22
   4   1  -7   46.01    6.91
   4  -1   7    0.76    7.47
  -4  -1   7    8.14    7.22
   4  -1   7    0.49    8.34
  -4  -1   7    3.78    6.03
  -4   1  -7   -4.25    8.90
   4   1  -7   40.43    9.17
  -4   1  -7   17.43    8.03
  -4  -1   7   10.32    6.53
   4   1  -8   -0.80    5.37
   4  -1   8   -9.29    7.25
   4   1  -8    0.51    7.41
  -4  -1   8    2.81    5.18
  -4   1  -8    8.30    8.66
  -4  -1   8   -3.54    5.84
  -4   1  -8    9.56    7.65
  -4  -1   8   17.36    7.04
   4  -1   8   -0.51    8.06
  -4  -1   8   -9.16    5.42
  -4  -1   9  132.60   34.05
   4   1  -9  119.75   34.75
  -4  -1   9  117.75   33.94
  -4  -1   9   35.39   33.61
  -4   1  -9  168.44   34.99
  -4  -1   9   80.50   34.37
   4  -1   9  155.30   34.76
  -4   1  -9  168.92   35.29
   4   1  -9  189.96   34.30
   4   1 -10  110.15   39.04
  -4  -1  10   69.50   37.78
  -4   1 -10  188.61   39.57
  -4  -1  10  139.12   38.29
   4   1 -10  219.41   38.70
  -4  -1  10  113.02   38.06
  -4   1 -10  225.92   39.63
  -4  -1  11   40.91   23.40
  -4  -1  11   75.44   23.75
  -4   1 -11  101.32   25.69
   4   1 -11  157.58   24.86
  -4   1 -11  114.84   25.80
   4   1 -11   77.94   25.19
  -4  -1  11   73.13   24.20
   4   1 -12  235.09   36.10
  -4  -1  12  159.13   35.54
  -4  -1  12   82.62   34.57
  -4  -1  12   73.23   34.63
  -4   1 -12  198.16   36.80
   4   1 -12  135.90   36.39
  -4   1 -12  154.89   36.59
   4   1 -13  199.83   37.11
  -4  -1  13  143.37   36.52
  -4   1 -13  177.31   37.80
  -4   1 -13  242.16   38.59
  -4  -1  14   76.74   34.60
  -4   1 -14  210.66   37.59
   4   1 -14  192.15   36.35
  -4   1 -14  136.97   36.75
  -4   1 -15  209.69   54.06
  -4   1 -15  168.33   53.19
   4   1 -15  227.34   53.15
   4   1 -16  190.59   42.52
  -4   1 -16  104.89   42.11
  -4   1 -16  179.82   43.47
  -4   1 -17   93.62   41.61
  -4   1 -17  171.98   43.07
   4   1 -17  198.69   42.16
  -4   1 -18   86.08   30.35
  -4   1 -18  121.98   31.97
   4   1 -18  108.41   30.66
  -4   1 -19   96.06   28.62
  -4   1 -19   52.97   26.23
   4   1 -19  112.76   27.38
  -5  -1 -18   52.50   20.49
  -5  -1 -18   49.47   19.58
  -5  -1 -17    2.90   14.52
  -5  -1 -17  -19.76   14.04
  -5   1  17   13.50   11.99
  -5   1  16   -3.11   11.13
  -5  -1 -16   26.33   15.02
  -5  -1 -16   20.04   13.56
  -5   1  15   27.98   11.37
  -5  -1 -15    3.52   13.04
  -5  -1 -15    4.24   13.67
  -5  -1 -14   17.86   13.86
  -5   1  14   35.86   12.17
  -5  -1 -14   32.38   15.03
  -5   1  14   18.36   11.03
  -5   1  13   40.32   14.07
  -5  -1 -13   46.12   15.96
  -5   1  13   34.88   13.51
  -5  -1 -12  166.88   30.88
  -5  -1 -12  147.05   30.90
  -5   1  12  102.13   29.24
  -5   1  12   66.87   28.84
   5  -1 -12   76.32   29.90
  -5  -1 -11   66.41   14.80
  -5   1  11   25.87   12.47
   5  -1 -11   28.13   13.37
  -5  -1 -11   60.13   15.38
  -5   1  11   31.16   11.94
  -5   1  11   18.43   12.04
   5  -1 -10  296.31   98.34
  -5   1  10  403.13   97.86
  -5   1  10  343.65   97.92
  -5  -1 -10  511.34   99.26
  -5   1  10  250.45   97.86
  -5  -1 -10  586.39   99.00
  -5   1  10  326.24   98.08
  -5   1   9  118.01   37.17
  -5   1   9   96.31   37.70
   5   1   9  185.49   38.07
  -5   1   9   88.30   37.30
  -5   1   9  123.20   37.66
  -5  -1  -9  215.67   39.25
  -5   1   9  150.29   37.07
  -5  -1  -9  218.12   38.54
   5  -1  -9  104.39   37.73
  -5   1   8  286.39   86.69
  -5   1   8  264.18   86.65
   5   1   8  417.04   86.80
   5  -1  -8  233.34   86.64
  -5  -1  -8  432.26   87.60
  -5   1   8  358.73   86.15
  -5   1   8  175.81   86.33
  -5  -1  -8  498.97   87.07
  -5   1   8  316.62   86.15
   5   1   7  267.88   47.96
  -5   1   7  173.85   46.97
  -5  -1  -7  310.90   48.23
  -5   1   7  181.10   47.97
  -5   1   7  142.90   47.75
   5  -1  -7  148.03   47.85
  -5  -1  -7  260.49   49.01
  -5   1   7  146.47   46.98
  -5   1   7   74.99   47.50
   5  -1  -6  236.27   68.67
  -5  -1  -6  457.77   68.97
  -5   1   6  293.70   68.85
   5   1   6  466.70   68.87
  -5   1   6  212.34   67.83
  -5   1   6  329.18   69.04
  -5   1   6  247.87   67.83
   5  -1  -5   89.22   29.42
  -5   1   5  101.63   29.44
  -5   1   5   86.87   29.61
   5   1   5  163.70   30.73
   5   1   5  152.88   29.04
   5  -1  -5   63.70   29.22
  -5   1   4  181.04   48.55
   5   1   4  261.20   48.00
   5  -1  -4   94.22   48.04
   5   1   4  247.03   49.20
  -5  -1  -4  212.11   48.91
  -5   1   4  141.24   48.23
   5  -1  -4  130.93   48.23
   5   1   3   11.16    8.04
  -5  -1  -3   -0.56    8.27
   5  -1  -3   -2.13    6.68
   5   1   3    4.52    4.55
   5   1   3   -3.24    8.19
   5   1   3   13.42    5.11
   5  -1  -3    5.00    7.40
  -5   1   3   -3.98    7.04
  -5   1   3    7.39    7.47
   5  -1  -2   94.52   29.78
   5   1   2  122.39   30.06
   5   1   2  112.94   28.73
   5   1   2  115.67   28.81
  -5  -1  -2  121.39   30.29
   5  -1  -2   76.76   29.52
  -5   1   2  110.25   30.05
   5   1   2  131.62   30.31
   5   1   1   -2.80    1.41
  -5   1   1   -3.07    7.44
   5  -1  -1    0.43    6.70
   5  -1  -1    5.64    7.15
   5   1   1   14.26    7.83
   5   1   1   -0.16    1.97
   5   1   1    0.47    6.80
  -5  -1  -1    5.15    7.69
   5   1   0   10.97    7.44
   5  -1   0    5.75    7.84
  -5  -1   0   16.87    8.28
  -5   1   0   10.98    8.52
   5  -1   0    7.48    7.35
   5   1   0   12.51    7.87
   5  -1   1   34.82   11.57
   5  -1   1   24.98   11.07
  -5   1  -1   37.51   11.92
  -5  -1   1   42.51   11.47
   5   1  -1   29.64   10.97
  -5   1  -1   34.68    8.73
   5   1  -1   34.24   11.43
  -5  -1   1   44.05   11.49
   5  -1   1   25.55    8.63
  -5   1  -2  241.16   55.02
   5  -1   2  189.13   54.93
  -5  -1   2  232.72   55.84
  -5  -1   2  195.62   55.71
   5   1  -2  187.60   55.78
   5   1  -2  233.16   55.71
   5  -1   2  179.51   55.75
  -5   1  -2  257.13   56.17
   5  -1   2  193.61   55.82
  -5  -1   3   41.06   15.14
  -5   1  -3   47.00   13.78
  -5  -1   3   65.83   15.37
   5   1  -3   47.09   15.43
   5  -1   3   37.09   15.30
   5   1  -3   49.88   14.79
   5  -1   3   53.34   13.77
  -5  -1   4  445.76  125.08
   5   1  -4  496.18  125.05
  -5  -1   4  481.18  125.22
  -5   1  -4  559.86  124.84
   5   1  -4  486.92  125.31
   5  -1   4  443.82  124.71
  -5   1  -5  168.85   38.56
   5   1  -5  142.77   38.15
  -5  -1   5  133.17   37.73
  -5   1  -5  145.71   37.35
  -5  -1   5  134.51   37.95
   5   1  -5  163.57   37.64
   5  -1   5  118.85   37.25
   5   1  -6  495.35   93.49
  -5  -1   6  310.35   92.54
   5  -1   6  487.25   93.39
  -5  -1   6  494.11   93.60
  -5   1  -6  605.12   94.52
   5   1  -6  461.76   93.92
  -5   1  -6  668.75   93.74
  -5  -1   6  303.57   92.55
  -5  -1   6  413.48   93.78
  -5  -1   7  279.25   79.93
   5  -1   7  323.65   80.58
   5   1  -7  309.99   80.51
  -5  -1   7  275.88   80.57
  -5   1  -7  399.51   81.52
   5   1  -7  321.96   81.04
  -5   1  -7  383.13   80.79
  -5  -1   8  558.99  131.76
  -5  -1   8  522.22  132.14
  -5   1  -8  746.54  132.67
   5  -1   8  587.66  132.34
  -5   1  -8  681.41  133.13
   5   1  -8  459.97  132.50
  -5   1  -9  297.60   57.16
  -5  -1   9  198.57   56.39
   5  -1   9  271.41   56.96
   5   1  -9  195.43   57.03
  -5  -1   9   92.69   56.02
  -5  -1   9  233.69   56.12
  -5   1  -9  264.94   57.71
   5   1 -10  469.60  123.39
  -5  -1  10  182.38  122.38
   5   1 -10  649.48  122.80
  -5   1 -10  682.77  123.67
  -5  -1  10  469.87  122.59
  -5   1 -10  581.22  123.79
  -5  -1  10  358.17  122.61
  -5   1 -11   56.17   18.94
  -5  -1  11   31.05   16.38
  -5   1 -11   66.78   18.55
   5   1 -11   52.76   18.36
   5   1 -11   80.54   16.83
  -5   1 -12  150.03   38.48
   5   1 -12  217.95   37.60
  -5  -1  12   93.31   36.88
  -5   1 -12  108.59   38.36
   5   1 -12  138.16   38.49
   5   1 -13   14.99   11.87
   5   1 -13   42.40   10.34
  -5   1 -13   -0.74   12.24
  -5   1 -13   18.19   12.49
  -5  -1  13    4.41    8.11
   5   1 -14   27.94   12.28
  -5   1 -14   44.12   14.63
  -5   1 -14    9.58   14.83
  -5   1 -15   18.85   13.36
   5   1 -15   22.76   10.68
  -5   1 -16   -0.87   12.96
  -5   1 -16   11.00   13.95
  -5   1 -17   35.17   16.49
  -5   1 -17   -0.89   13.19
  -6  -1 -16   19.39   15.46
  -6  -1 -16   16.42   15.13
  -6  -1 -15  321.79   94.56
  -6  -1 -15  403.06   94.63
  -6  -1 -14   57.99   25.18
  -6  -1 -14   94.90   24.74
   6  -1 -13  124.45   55.44
  -6   1  13  106.09   54.69
  -6  -1 -13  277.96   56.96
  -6  -1 -13  378.96   56.88
   6  -1 -12   15.02   12.08
  -6   1  12   17.57   10.15
  -6  -1 -12    9.97   13.69
  -6  -1 -12   30.32   12.97
  -6   1  11   44.86   22.17
  -6  -1 -11   79.79   24.57
   6  -1 -11   50.91   22.74
  -6  -1 -10  -12.72   11.90
  -6  -1 -10    5.20    9.88
   6  -1 -10    0.63    9.22
  -6   1  10    1.12    8.49
  -6  -1  -9    3.28   11.85
  -6  -1  -9   23.50    9.31
  -6   1   9    2.81    8.76
   6  -1  -9   -6.01    9.36
   6  -1  -8   -4.05    9.08
  -6  -1  -8    3.96   11.62
   6   1   8    3.06    8.04
  -6   1   8   13.04    9.21
  -6   1   8    6.69    3.09
   6  -1  -7   39.25   15.58
  -6   1   7   44.65   16.00
   6   1   7   66.49   14.84
   6   1   7   43.99   16.79
   6   1   6   17.90   10.95
   6  -1  -6    4.37    8.21
   6   1   6   -0.68    6.68
  -6   1   6    5.79    9.54
   6   1   6   -0.72    7.20
  -6   1   5  172.79   49.99
   6  -1  -5   84.01   49.22
   6   1   5  234.89   49.11
  -6   1   5  151.88   49.64
  -6  -1  -5  213.52   50.67
   6   1   5  223.59   49.23
   6   1   5  203.40   50.50
   6   1   4   34.52   10.24
   6  -1  -4   12.15   11.93
  -6  -1  -4   63.74   14.39
   6   1   4   28.65   13.51
  -6   1   4   31.16   12.29
  -6   1   4   23.16   12.88
   6   1   4   35.67   10.51
   6   1   3  377.35   84.07
   6  -1  -3  235.02   84.75
   6   1   3  328.12   85.27
  -6   1   3  336.41   85.17
   6   1   3  312.70   84.06
  -6  -1  -3  357.38   85.38
   6   1   2   64.31   21.87
  -6  -1  -2  112.95   24.93
   6   1   2  109.49   24.73
   6   1   2  102.39   21.83
   6  -1  -2   61.69   23.56
  -6   1   2  101.21   24.68
  -6  -1  -1  778.57  159.64
  -6   1   1  661.26  159.48
   6   1   1  586.62  159.32
   6  -1  -1  473.33  158.98
  -6   1   0   89.97   23.57
   6   1   0   95.92   23.53
  -6  -1   0   79.28   23.23
   6  -1   0   58.09   22.72
  -6   1  -1  831.66  179.68
  -6  -1   1  769.25  179.43
   6   1  -1  652.11  179.27
   6  -1   1  568.97  179.10
   6   1  -2   27.00   12.02
   6  -1   2   21.82   11.94
   6  -1   2   30.99    8.62
  -6  -1   2   27.58   12.31
  -6   1  -2   43.41   13.48
  -6   1  -3  462.10  106.39
   6  -1   3  357.89  105.96
   6  -1   3  347.76  105.03
  -6  -1   3  439.70  106.00
   6   1  -3  361.49  105.89
  -6   1  -3  474.91  105.14
  -6   1  -4   17.51    7.48
  -6  -1   4   14.13    9.81
   6  -1   4   15.01    6.89
   6  -1   4   16.74   10.33
   6   1  -4   15.22    9.77
  -6   1  -5   96.90   25.02
   6   1  -5   62.50   25.94
   6  -1   5   84.87   26.66
   6  -1   5   94.01   24.86
   6   1  -5  118.56   25.80
  -6  -1   5  101.06   26.15
  -6  -1   6    1.03    8.65
  -6   1  -6    9.71    7.21
   6   1  -6   -4.43    8.95
   6  -1   6   -5.29    6.65
  -6   1  -6    2.97   10.85
   6   1  -6   -9.53    7.90
   6  -1   7   10.01    7.65
  -6   1  -7    2.56    7.83
  -6   1  -7   26.75   11.80
   6   1  -7   -0.65    9.00
   6   1  -7   -5.12    7.58
  -6  -1   7   13.57    9.03
  -6  -1   8   -5.92    8.01
  -6   1  -8   26.76   12.13
  -6  -1   8   21.04    9.79
   6   1  -8   -3.35    9.85
   6  -1   8   24.60    8.79
  -6   1  -8   17.76    9.41
  -6   1  -9   30.44   12.41
  -6  -1   9   20.51   11.40
  -6   1  -9   39.71   14.38
   6   1  -9   34.00   13.11
  -6  -1  10   12.98    8.65
  -6   1 -10    7.51   11.68
   6   1 -10    5.04   10.48
  -6   1 -10    1.18    9.63
  -6   1 -11  245.16   42.67
   6   1 -11  115.46   42.16
  -6  -1  11  109.76   41.05
  -6   1 -11  170.22   43.10
  -6  -1  12   12.17    9.34
   6   1 -12    2.34   12.11
  -6   1 -12   30.08   12.64
  -6   1 -12   21.26   13.48
  -6   1 -13  414.60   83.24
   6   1 -13  191.55   82.62
  -6   1 -13  334.65   83.35
  -6   1 -14  104.24   25.91
   6   1 -14   53.63   25.11
  -6   1 -14   81.63   26.12
  -6   1 -15  317.93   76.21
  -6   1 -15  260.41   75.99
  -6   1 -16   55.96   19.45
  -6   1 -16   25.77   18.11
  -7  -1 -14   26.13   16.92
   7  -1 -13    2.34   12.32
  -7  -1 -13  -10.59   14.83
  -7  -1 -12  141.01   28.00
  -7   1  12   69.30   25.04
   7  -1 -12   55.73   25.47
   7  -1 -11   -6.55   11.13
  -7   1  11   -5.81   10.56
  -7  -1 -11    6.00   14.25
   7   1  10  238.97   58.39
  -7   1  10  144.47   56.69
   7   1  10  310.90   57.24
  -7  -1 -10  255.47   58.39
   7  -1 -10  131.02   56.74
   7   1   9   30.65   10.31
   7  -1  -9    0.68   10.98
  -7   1   9    3.31   10.69
   7   1   9  -21.16   15.59
  -7  -1  -9   11.32   13.57
   7  -1  -8  191.34   88.00
   7   1   8  420.10   89.54
  -7   1   8  256.85   88.18
   7   1   8  474.37   88.23
   7  -1  -7   -1.96    9.87
   7   1   7    6.06    8.56
  -7   1   7   16.29   11.40
   7   1   7    8.54   12.71
  -7   1   6  465.70  140.41
   7   1   6  578.30  140.99
   7   1   6  646.47  139.90
   7  -1  -6  285.77  139.90
  -7  -1  -6  708.64  141.33
  -7  -1  -5   28.50   13.03
   7  -1  -5   -1.27    9.33
  -7   1   5   -6.28   10.70
   7   1   5    8.00   12.28
  -7  -1  -4  400.68   76.56
   7  -1  -4  166.71   75.06
   7   1   4  340.45   76.34
  -7   1   4  275.42   75.84
   7   1   3   37.88   13.47
   7  -1  -3   28.29   12.30
  -7   1   3   28.04   13.08
  -7  -1  -3   24.54   13.74
   7   1   2    8.89   10.79
  -7  -1  -2   13.09   11.84
   7  -1  -2   -8.85    9.89
  -7   1   2   -0.73   10.20
   7  -1  -1   -0.64    9.40
  -7  -1  -1    2.99   10.51
  -7   1   1  -16.38   11.57
   7   1   1   14.55   10.50
  -7   1   0   -0.76   11.80
   7   1   0    2.15   10.26
  -7  -1   0   11.66   11.21
   7  -1   0   14.93    9.84
  -7  -1   1   25.55   11.91
   7   1  -1    2.85   10.91
   7  -1   1   23.88   10.92
  -7   1  -1   13.94   12.53
   7   1  -2   48.18   14.50
  -7  -1   2   39.42   14.36
   7  -1   2   17.70   14.27
  -7   1  -2   34.01   15.22
   7   1  -3    9.93   10.18
  -7   1  -3    5.66   11.42
  -7  -1   3   -2.70   10.23
   7  -1   3   -0.70   10.72
  -7   1  -4  208.57   51.02
   7  -1   4  134.22   50.33
   7   1  -4  188.93   50.37
  -7  -1   4  215.69   50.40
  -7  -1   5   25.66   10.79
   7   1  -5    9.37   10.64
   7  -1   5    2.26   11.45
  -7   1  -5    9.62    7.47
   7   1  -6  371.51  105.02
   7  -1   6  335.36  105.05
  -7   1  -6  464.07  104.23
  -7  -1   6  401.69  104.82
  -7   1  -7   24.94   13.82
   7   1  -7    9.69   10.34
  -7  -1   7   13.42   10.59
  -7   1  -7   -3.77    8.58
   7  -1   7   -7.33   12.88
   7   1  -8  263.00   87.50
  -7   1  -8  416.46   87.23
   7  -1   8  287.95   88.03
  -7   1  -8  384.65   88.44
  -7  -1   8  299.62   87.21
  -7   1  -9   13.13   13.65
  -7   1  -9   17.58   10.03
   7   1  -9   -0.78   11.58
  -7  -1   9   -5.79   10.07
  -7  -1  10  105.08   34.57
  -7   1 -10  154.00   36.77
  -7   1 -10  175.64   35.33
   7   1 -10   68.47   35.38
  -7   1 -11    4.53   10.78
   7   1 -11   -5.81   11.88
  -7   1 -11   13.83   13.70
   7   1 -12   40.36   21.99
  -7   1 -12   64.77   21.40
  -7   1 -12   96.27   24.08
  -7   1 -13   28.95   13.74
   7   1 -13    0.89   12.87
  -7   1 -13    2.08   15.51
  -7   1 -14   -6.39   15.39
  -7   1 -14   -2.46   13.56
   7   1 -14    4.60   14.19
  -8  -1 -11   94.88   25.91
   8  -1 -11   38.75   22.12
   8   1  11   81.79   25.75
  -8  -1 -10   11.01   15.65
   8  -1 -10   -2.36   12.29
   8   1  10   11.75   15.77
  -8   1  10   15.10   12.47
  -8   1   9   21.48   13.50
   8  -1  -9    2.32   12.61
   8   1   9   26.86   15.84
   8  -1  -8   -6.82   11.42
  -8   1   8    0.78   12.84
   8   1   8   10.00   14.47
   8   1   7   21.33   15.25
  -8  -1  -7   23.41   15.90
   8  -1  -7   -2.24   12.50
  -8   1   7   33.99   14.10
  -8   1   6   -2.41   11.95
   8   1   6    6.59   13.72
  -8  -1  -6  -14.88   15.07
   8  -1  -6    8.88   11.63
   8   1   5  138.33   32.86
  -8   1   5  118.11   31.98
  -8  -1  -5  150.82   33.09
   8  -1  -5   37.47   30.65
   8   1   4   15.19   13.88
  -8  -1  -4   13.19   13.92
  -8   1   4   14.06   12.92
   8  -1  -4   14.66   11.36
   8   1   3  230.68   54.63
  -8   1   3  211.06   54.49
   8  -1  -3   90.37   53.42
  -8  -1  -3  282.08   55.17
  -8  -1  -2   25.08   13.61
   8  -1  -2   21.44   11.78
   8   1   2    1.71   13.78
  -8   1   2    5.13   13.22
   8   1   1  454.46   97.15
   8  -1  -1  207.90   96.15
  -8   1   1  346.11   96.81
  -8  -1  -1  481.96   97.34
  -8   1   0   19.49   14.81
  -8  -1   0   44.38   14.94
   8  -1   0    0.76   13.95
   8   1   0   38.30   15.01
  -8  -1   1  514.04  109.30
  -8   1  -1  494.60  109.46
   8  -1   1  254.47  108.40
   8   1  -1  419.11  109.01
  -8  -1   2   14.65   13.59
   8  -1   2   11.86   13.22
   8   1  -2   24.63   13.76
  -8   1  -2   34.96   15.54
  -8   1  -3  183.96   47.50
   8  -1   3  119.32   46.67
   8   1  -3  159.05   47.13
  -8  -1   3  223.32   47.39
  -8   1  -4   -8.63   13.03
   8  -1   4   -5.01   12.56
  -8  -1   4   -0.78   11.45
   8   1  -4    6.57   11.69
  -8   1  -5   65.63   25.21
   8   1  -5   50.44   23.28
   8  -1   5   57.71   24.13
  -8  -1   5  122.00   24.33
   8  -1   6   13.36   13.52
   8   1  -6   -5.01   12.34
  -8  -1   6  -12.58   11.77
   8   1  -7    9.31   12.17
   8  -1   7   -2.77   13.96
  -8  -1   7   11.54   11.56
   8   1  -8   -8.60   12.47
  -8  -1   8   14.06   11.40
  -8   1  -8    2.09   14.75
   8  -1   8  -12.43   14.07
  -8   1  -9   16.07   17.07
  -8  -1   9   32.83   13.66
   8  -1   9   29.76   16.58
   8   1  -9   18.41   14.00
   8  -1  10  -10.31   14.80
   8   1 -10    5.37   12.26
  -8   1 -10    9.86   15.64
  -9   1   5   -5.61   14.54
   9   1   5  -17.59   15.97
  -9  -1  -5   19.80   15.95
   9  -1  -5   -2.51   12.19
   9   1   4   76.95   27.17
   9  -1  -4   51.13   25.05
  -9   1   4   77.01   26.66
  -9  -1  -4  127.91   28.18
   9   1   3   14.90   14.18
   9  -1  -3    7.58   13.00
  -9   1   3   15.46   14.71
  -9  -1  -3   10.51   15.33
  -9  -1  -2  101.67   21.95
   9  -1  -2   33.94   18.36
   9   1   2   36.10   20.04
  -9   1   2   34.39   19.70
   9  -1  -1   -5.15   12.52
  -9  -1  -1   -1.00   13.80
   9   1   1   -0.96   13.39
  -9   1   1   13.99   14.12
   9  -1   0   -0.87   13.09
  -9   1   0   23.39   15.11
   9   1   0   15.20   13.07
  -9  -1   0    2.95   14.16
  -9  -1   1   16.32   14.54
   9   1  -1   10.36   13.31
  -9   1  -1   -8.28   15.23
   9  -1   1    2.66   13.09
  -9  -1   2  105.14   25.02
   9   1  -2   49.59   23.93
  -9   1  -2   93.80   25.88
   9  -1   2   41.57   23.91
   9   1  -3   13.06   13.83
   9  -1   3    7.40   13.89
  -9   1  -3   10.74   15.68
  -9  -1   3   13.77   14.28
   9   1  -4   86.77   37.17
   9  -1   4  110.87   37.75
  -9   1  -4  170.70   39.38
  -9  -1   4  152.57   37.90
  -9  -1   5    6.14   13.78
   9  -1   5   19.47   15.05
   9   1  -5    9.36   13.47
  -9   1  -5   21.20   16.94
   0  -2 -21   17.56   16.70
   0  -2 -20   95.15   29.96
   0  -2 -19   -1.82    8.72
   0  -2 -19   13.62   14.82
   0  -2 -18  131.91   45.29
   0  -2 -18  239.09   47.91
   0  -2 -17    2.23    8.15
   0  -2 -17    6.83   12.65
   0  -2 -16  356.85  109.43
   0  -2 -16  536.71  110.72
   0  -2 -15    3.03    7.84
   0  -2 -15  -10.33   11.39
   0   2  15    4.21    8.18
   0  -2 -14  837.63  175.40
   0   2  14  703.95  174.60
   0  -2 -14  582.70  174.46
   0  -2 -13    8.81    9.51
   0  -2 -13   -6.27    7.37
   0   2  13   -6.67    7.14
   0  -2 -12  422.65   95.87
   0  -2 -12  337.60   95.17
   0   2  12  373.13   95.24
   0   2  11    4.33    7.03
   0  -2 -11   -7.43    6.03
   0   2  11    5.49    6.36
   0  -2 -11    4.73    7.68
   0   2  10  187.82   51.81
   0  -2 -10  176.67   51.72
   0  -2 -10  223.50   52.25
   0   2  10  241.16   52.26
   0   2   9    2.38    6.27
   0  -2  -9    5.55    6.67
   0  -2  -9    0.67    5.36
   0   2   9    3.46    5.35
   0   2   8  171.65   43.27
   0  -2  -8  179.42   43.57
   0  -2  -8  138.54   43.18
   0   2   8  204.06   43.64
   0   2   7    0.95    5.47
   0  -2  -7    1.11    4.75
   0  -2  -7    7.70    5.64
   0   2   7    2.11    4.68
   0  -2  -6 1158.51  263.10
   0   2   6 1057.77  262.93
   0  -2  -6  933.66  262.89
   0  -2  -5    1.77    4.04
   0   2   5    8.94    4.62
   0   2   4  103.63   27.26
   0  -2  -4  106.28   27.23
   0  -2  -3    1.69    3.27
   0  -2  -1    9.09    2.33
   0   2   1    4.33    3.03
   0   2   1    2.50    2.36
   0   2   0  678.79  148.80
   0  -2   0  487.28  148.80
   0  -2   0  668.15  148.79
   0   2   0  493.46  148.80
   0  -2   1    5.07    2.35
   0   2  -1    5.00    2.30
   0  -2   1    1.72    2.66
   0   2  -1    4.48    2.77
   0   2  -2  655.29  112.18
   0  -2   2  478.37  112.27
   0   2  -2  273.89  112.08
   0  -2   3    5.42    2.32
   0   2  -3    2.55    2.24
   0   2  -3    0.54    3.68
   0  -2   3    3.37    3.61
   0   2  -4   10.58    3.52
   0  -2   4    7.48    5.20
   0  -2   4    9.88    3.55
   0   2  -4   13.16    5.05
   0   2  -5    3.58    4.70
   0   2  -5    0.34    2.43
   0  -2   5    0.68    2.40
   0  -2   6   30.94    9.02
   0   2  -6   31.45    9.05
   0   2  -6   45.28   10.36
   0  -2   6   35.85   10.24
   0   2  -7    6.84    5.47
   0   2  -7    2.52    3.22
   0  -2   7    0.12    3.11
   0  -2   7    9.01    5.52
   0   2  -8   29.86   10.06
   0   2  -8   31.32    8.52
   0  -2   8   23.54   10.11
   0  -2   8   30.34    8.50
   0   2  -9   -2.05    3.63
   0  -2   9   -5.15    3.67
   0   2  -9   -1.31    6.49
   0  -2  10  242.08   60.74
   0   2 -10  194.55   59.93
   0  -2  10  230.11   59.96
   0   2 -10  345.92   61.08
   0  -2  11   -0.49    7.63
   0  -2  11   -6.35    7.34
   0  -2  11   10.24    4.61
   0   2 -11   -2.60    4.32
   0   2 -11    5.34    7.83
   0   2 -12  298.95   89.84
   0   2 -12  533.20   91.25
   0  -2  12  332.96   89.88
   0   2 -13   -4.95    5.32
   0   2 -13   13.40    9.66
   0  -2  13    1.50    5.50
   0   2 -14 1046.09  163.73
   0   2 -14  488.90  161.91
   0  -2  14  637.78  162.05
   0  -2  15    3.16    6.11
   0   2 -15   -4.49   11.32
   0   2 -15   -9.02    6.00
   0   2 -16  214.35   80.73
   0   2 -16  594.00   83.76
   0   2 -17    0.86   12.97
   0   2 -18  178.91   48.72
   0   2 -19    3.93   13.94
   0   2 -20   91.96   28.93
   0   2 -21    5.54   15.67
  -1  -2 -21  208.13   57.05
   1  -2 -20   -2.01   14.39
  -1  -2 -20    6.25   10.39
  -1  -2 -20   -1.06   15.37
  -1  -2 -19   70.97   19.60
  -1  -2 -19   18.76   15.57
   1  -2 -19   52.02   19.30
   1  -2 -18   -4.85    7.69
  -1  -2 -18   20.58    9.86
   1  -2 -18   21.27   14.03
  -1  -2 -18  -19.71   14.48
   1  -2 -17   20.70   12.75
  -1  -2 -17    9.66   13.95
  -1  -2 -17    1.85    9.39
   1  -2 -17   15.52    8.17
  -1  -2 -16   -0.82   12.70
   1  -2 -16    3.46    6.71
   1  -2 -16   23.12   12.08
  -1  -2 -16   -3.52    8.71
  -1   2  16    0.46    8.11
   1  -2 -15   51.46   18.74
  -1  -2 -15   68.02   17.30
  -1   2  15   68.25   16.86
   1  -2 -15   38.53   16.12
   1   2  14   33.55   12.78
  -1  -2 -14   49.07   12.82
  -1   2  14   23.24   12.02
   1  -2 -14   35.65   14.04
   1  -2 -14   30.25   11.55
  -1   2  13  299.06   79.35
   1  -2 -13  197.58   78.90
  -1  -2 -13  354.75   79.47
  -1   2  13  301.14   79.23
   1  -2 -13  384.90   80.03
   1   2  13  368.68   79.44
  -1   2  12   35.03   10.72
  -1   2  12   29.02    9.80
   1  -2 -12   29.98   10.96
  -1   2  12   31.00    9.48
  -1  -2 -12   23.38    9.94
   1   2  12   25.12    9.94
   1  -2 -12    9.06    8.47
  -1  -2 -11  797.31  175.33
  -1   2  11  598.05  175.04
   1  -2 -11  375.55  174.76
  -1   2  11  918.13  175.55
   1   2  11  877.97  175.32
  -1   2  11  642.08  175.10
   1  -2 -11  898.44  175.58
   1  -2 -10   16.40    8.81
   1  -2 -10   13.71    7.20
  -1   2  10   18.47    7.89
   1   2  10   24.17    9.09
  -1  -2 -10   30.54    8.39
   1   2  10   16.72    8.15
  -1   2  10    9.69    7.52
  -1   2  10   32.47    8.80
   1  -2  -9 1556.03  315.00
  -1  -2  -9 1462.62  314.89
   1  -2  -9  654.64  314.41
  -1   2   9 1126.48  314.62
   1   2   9 1419.92  314.82
   1   2   9 1765.14  315.13
  -1   2   9 1065.53  314.61
  -1   2   9 1506.26  314.93
   1  -2  -8  279.26   64.39
  -1  -2  -8  279.99   64.28
  -1   2   8  245.64   64.06
   1   2   8  348.21   64.51
   1  -2  -8  124.22   63.80
   1   2   8  309.56   64.31
  -1   2   8  210.63   64.00
  -1   2   8  334.62   64.41
  -1   2   7  989.11  303.02
   1   2   7 1424.77  303.29
   1  -2  -7 1524.27  303.37
   1   2   7 1687.02  303.47
  -1   2   7 1082.25  303.07
  -1   2   7 1520.48  303.33
   1  -2  -7  615.58  302.91
  -1  -2  -7 1397.83  303.30
   1   2   6  447.48   88.89
   1   2   6  523.69   89.04
  -1   2   6  289.00   88.60
  -1   2   6  304.07   88.55
   1  -2  -6  187.04   88.47
  -1  -2  -6  419.48   88.89
  -1   2   6  465.17   88.89
  -1   2   5  769.04  230.93
  -1   2   5 1182.82  231.20
   1  -2  -5  473.09  230.90
   1   2   5 1307.36  231.33
  -1  -2  -5 1069.65  231.22
  -1  -2  -5 1164.18  231.30
  -1   2   5  638.15  230.96
  -1   2   5 1114.76  231.19
   1   2   5 1071.92  231.20
  -1   2   4    0.35    2.78
  -1   2   4    5.10    4.07
  -1   2   4    2.35    4.19
   1  -2  -4    2.45    3.61
   1   2   4   -4.08    4.40
   1   2   4   -1.57    4.62
  -1   2   4    4.33    3.85
  -1  -2  -4    0.23    4.27
   1   2   3  291.44   50.27
  -1   2   3  243.88   50.17
  -1   2   3  161.52   49.84
   1  -2  -3  215.38   50.14
   1  -2  -3  122.11   49.99
   1   2   3  268.99   50.29
  -1   2   3  147.27   50.05
  -1   2   2  146.72   33.84
   1   2   2  164.04   33.91
   1   2   2  148.24   33.95
  -1  -2  -2  139.21   33.89
   1  -2  -2  122.70   33.81
   1  -2  -2   77.57   33.74
  -1  -2  -1   32.19    7.87
  -1   2   1   24.90    7.68
   1   2   1   30.69    7.74
  -1  -2  -1   27.08    7.90
   1  -2  -1   19.83    7.75
   1   2   1   31.65    7.90
   1   2   0   12.30    4.95
  -1  -2   0   15.53    5.26
  -1   2   0   14.90    5.06
  -1  -2   0    9.85    4.92
   1   2   0   19.10    4.85
   1  -2   0   11.42    4.94
  -1  -2   0   21.57    4.99
  -1   2   0   16.07    4.90
  -1  -2   1   71.48   17.97
   1   2  -1   74.89   18.03
  -1  -2   1   50.90   18.11
   1  -2   1   72.54   18.14
   1   2  -1   67.81   17.94
  -1  -2   1   54.27   18.01
  -1   2  -1   77.71   18.12
  -1   2  -1   82.42   18.16
   1  -2   1   67.93   18.16
   1   2  -2   92.27   20.26
  -1  -2   2   73.77   20.00
  -1   2  -2   88.59   20.38
  -1  -2   2   69.44   20.26
  -1   2  -2   87.17   20.33
   1   2  -2   71.19   19.99
   1  -2   2   81.20   20.30
   1  -2   2   74.97   20.35
   1  -2   3  372.94   99.87
  -1   2  -3  435.78   99.92
  -1   2  -3  405.93   99.97
   1   2  -3  407.30   99.89
   1  -2   3  356.01   99.94
  -1  -2   3  363.30   99.88
  -1  -2   4   -9.89    4.25
   1  -2   4    2.02    4.31
  -1   2  -4   -3.73    3.89
   1   2  -4   -1.18    3.76
   1  -2   4    2.96    3.75
  -1  -2   5  939.85  264.12
  -1   2  -5 1162.47  264.11
   1  -2   5  954.53  264.20
   1  -2   5  990.16  264.04
   1   2  -5 1108.33  264.20
  -1   2  -6   24.36    7.44
  -1  -2   6   14.79    7.88
   1  -2   6   17.43    8.00
   1  -2   6   25.61    7.39
   1   2  -6   26.66    7.72
   1   2  -6   24.29    7.92
   1   2  -7 2015.34  457.39
   1  -2   7 1638.52  457.36
  -1  -2   7 1630.82  457.26
   1  -2   7 1682.14  457.11
  -1   2  -7 1971.98  457.19
   1  -2   8  118.91   22.41
   1  -2   8  128.45   21.61
   1   2  -8   63.93   20.70
  -1   2  -8  150.16   21.82
  -1  -2   8   67.57   20.71
  -1  -2   8  114.77   22.16
   1   2  -8  159.45   22.56
  -1  -2   8  102.94   22.22
  -1  -2   9  521.45  142.42
  -1   2  -9  900.09  143.07
   1  -2   9  827.44  142.96
   1   2  -9  380.42  142.37
  -1  -2   9  711.36  143.30
  -1  -2   9  750.30  143.32
   1   2  -9  998.08  143.62
   1   2 -10  168.45   27.78
  -1  -2  10   91.98   25.88
   1   2 -10   68.49   25.81
   1  -2  10  128.54   26.67
  -1   2 -10  165.10   26.97
  -1  -2  10  124.19   27.40
  -1  -2  10  115.44   27.35
  -1  -2  11  189.24   41.81
   1  -2  11  227.57   41.21
  -1  -2  11  170.11   41.71
   1   2 -11  275.88   42.29
  -1  -2  11  142.01   40.47
  -1   2 -11  200.13   41.23
   1   2 -11  109.48   40.39
   1   2 -12    5.20    3.94
  -1  -2  12    6.48    4.45
   1  -2  12    6.23    6.19
  -1   2 -12   13.82    6.80
   1   2 -12   23.03    9.16
   1   2 -13  116.66   22.44
   1  -2  13  102.60   20.80
  -1  -2  13   67.54   19.76
  -1   2 -13  113.50   20.98
   1   2 -13   46.14   19.53
  -1   2 -14   -4.10    7.05
   1   2 -14   -1.20    4.00
   1  -2  14   11.27    6.85
  -1  -2  14    2.32    4.53
   1   2 -14    2.00    9.73
  -1   2 -15   -0.79    6.86
  -1   2 -15    8.50   11.34
   1   2 -15   -3.01    4.36
   1  -2  15   -2.97    7.00
   1   2 -15   -0.72   10.56
  -1   2 -16    9.12   10.06
  -1   2 -16   37.39   14.94
   1   2 -16   46.71   14.33
  -1   2 -17   60.21   21.78
  -1   2 -17  101.40   25.01
   1   2 -17   88.56   24.47
  -1   2 -18    7.60   14.26
   1   2 -18   -2.68   12.94
   1   2 -19  149.80   47.90
  -1   2 -19  201.25   48.46
  -1   2 -20    6.44   15.96
   1   2 -20   26.38   15.94
  -2  -2 -20   98.71   28.72
  -2  -2 -19   20.84   12.77
  -2  -2 -18  306.56   66.32
  -2  -2 -18  203.38   64.78
  -2  -2 -17   -0.69   11.83
   2  -2 -17   15.84    9.31
  -2  -2 -17   43.36   15.88
   2  -2 -17   21.63   13.99
   2  -2 -16  490.99   97.68
  -2  -2 -16  514.58   98.06
   2  -2 -16  206.26   96.10
  -2  -2 -16  400.03   96.97
  -2   2  15   21.75   13.17
   2  -2 -15   28.76   13.07
   2  -2 -15   65.58   15.96
  -2  -2 -15   41.34   14.91
  -2  -2 -15   49.49   16.92
  -2  -2 -14  450.62   81.97
   2  -2 -14  158.65   80.20
  -2  -2 -14  406.58   81.09
   2  -2 -14  395.94   81.42
  -2   2  14  211.08   80.29
   2  -2 -13   26.55   18.62
  -2   2  13   45.61   18.84
  -2  -2 -13  102.73   20.16
  -2   2  13   43.50   18.72
   2  -2 -13   74.20   20.22
  -2  -2 -13  115.24   21.35
  -2   2  12   92.30   36.27
  -2  -2 -12  177.16   37.34
   2  -2 -12  180.73   37.35
   2  -2 -12   53.14   36.18
  -2   2  12  181.16   37.19
  -2   2  12  111.79   36.46
   2   2  12  183.26   37.31
  -2  -2 -12  200.85   37.99
   2   2  11   10.65    7.76
  -2  -2 -11    5.03    7.77
  -2  -2 -11    7.94    8.79
  -2   2  11    8.04    7.35
  -2   2  11    3.85    6.16
  -2   2  11   -9.67    6.48
   2  -2 -11    2.42    7.67
   2  -2 -11    4.47    6.11
   2   2  10    3.06    7.15
   2   2  10    7.58    7.28
   2  -2 -10   11.75    7.56
  -2  -2 -10   16.53    8.18
  -2   2  10    6.47    6.84
   2  -2 -10    2.82    5.72
  -2  -2 -10   14.17    8.29
  -2   2  10    0.66    5.85
  -2   2  10    1.45    5.74
  -2   2   9   13.58    6.72
  -2  -2  -9   15.48    8.07
  -2  -2  -9   23.80    8.82
  -2   2   9   14.52    7.27
   2   2   9   25.84    8.29
  -2   2   9   14.14    6.86
   2  -2  -9    6.32    6.63
   2   2   9   28.88    8.06
  -2   2   8   67.52   22.71
  -2  -2  -8  118.37   23.60
   2  -2  -8   32.32   22.66
  -2   2   8  103.64   23.17
  -2   2   8   50.51   22.71
   2   2   8  116.72   23.53
   2   2   8  128.00   23.52
  -2  -2  -8  108.47   23.41
  -2   2   7  136.97   27.73
   2  -2  -7   49.48   27.29
  -2  -2  -7  140.33   28.13
  -2  -2  -7  131.41   28.13
  -2   2   7   74.29   27.31
  -2   2   7  120.44   27.71
  -2   2   7   63.55   27.30
   2   2   7  149.02   28.12
   2   2   7  142.94   28.04
   2   2   6  269.42   55.29
  -2  -2  -6  287.63   55.38
  -2  -2  -6  314.87   55.42
  -2   2   6  259.97   55.03
  -2   2   6  146.72   54.71
  -2   2   6  257.62   55.07
   2   2   6  290.31   55.25
   2  -2  -6   57.76   54.68
  -2   2   6  158.43   54.84
  -2  -2  -5    6.48    5.17
  -2  -2  -5    6.52    5.45
  -2   2   5    1.68    4.21
  -2   2   5    4.99    3.77
   2   2   5    5.62    4.97
  -2   2   5    4.14    4.60
  -2   2   5    2.79    4.41
   2  -2  -5    2.95    4.20
  -2   2   4 1878.54  529.54
  -2   2   4 2397.76  529.66
  -2   2   4 2077.34  529.75
  -2   2   4 2492.16  529.66
   2   2   4 2844.41  529.83
  -2   2   4 1403.92  529.59
   2  -2  -4 1881.74  529.54
   2   2   3  349.98   80.47
   2  -2  -3  263.68   80.09
   2   2   3  390.28   80.38
   2  -2  -3  324.88   80.19
  -2   2   3  328.27   80.22
   2   2   3  407.59   80.38
  -2   2   3  316.33   80.15
  -2   2   3  153.32   80.16
  -2   2   3  338.70   80.43
   2   2   2 2366.32  480.25
   2   2   2 2173.14  480.38
  -2   2   2 1816.89  480.13
  -2   2   2 1974.56  480.34
  -2   2   2 1690.03  480.09
   2   2   2 2229.73  480.25
   2  -2  -2 1690.52  480.09
   2  -2  -2 1698.77  480.11
   2  -2  -1  472.46  140.93
   2  -2  -1  532.92  140.95
  -2  -2  -1  671.13  141.24
   2   2   1  632.21  141.02
   2  -2  -1  568.68  141.18
  -2  -2  -1  584.08  141.00
  -2   2   1  481.68  140.93
   2   2   1  618.07  141.18
  -2   2   0  956.11  229.29
  -2  -2   0  905.84  229.25
   2   2   0  989.14  229.41
   2   2   0  910.82  229.24
   2  -2   0  716.68  229.23
  -2  -2   0 1025.71  229.44
  -2   2  -1  609.59  139.87
  -2  -2   1  606.61  139.72
   2  -2   1  548.65  139.63
   2   2  -1  571.56  139.69
   2   2  -1  505.14  139.55
  -2   2  -1  646.76  139.69
  -2  -2   1  457.23  139.53
   2   2  -2 1034.56  253.43
   2   2  -2  962.28  253.46
   2  -2   2 1007.06  253.54
   2   2  -2  813.36  253.60
  -2  -2   2  840.54  253.40
  -2   2  -2 1190.93  253.74
  -2  -2   2 1029.61  253.49
   2  -2   2 1069.28  253.67
  -2   2  -2 1151.00  253.58
   2  -2   3  276.88   69.09
  -2   2  -3  308.86   69.23
  -2   2  -3  304.48   69.12
   2   2  -3  216.13   69.13
   2   2  -3  278.96   68.91
  -2  -2   3  263.48   68.88
   2  -2   3  295.64   69.20
   2   2  -3  264.83   68.87
  -2  -2   3  243.38   68.89
   2  -2   4 1086.36  261.19
  -2   2  -4 1214.09  261.25
  -2   2  -4 1229.35  261.28
  -2  -2   4  991.96  261.01
  -2  -2   4  965.93  260.89
   2   2  -4 1067.94  261.03
   2   2  -4  787.37  261.13
   2  -2   4 1084.23  261.20
   2   2  -4 1003.27  260.89
   2   2  -5   45.68   11.52
   2   2  -5   38.28   10.79
  -2  -2   5   20.09   11.87
   2  -2   5   52.73   11.86
  -2   2  -5   41.65   11.87
  -2   2  -5   42.70   11.89
   2  -2   5   42.84   11.88
  -2  -2   5   38.68   10.85
   2   2  -5   40.64   12.02
  -2  -2   5   49.52   11.53
  -2  -2   6   21.94   11.11
   2   2  -6   53.59   12.22
   2  -2   6   66.38   12.79
  -2  -2   6   41.90   11.20
  -2  -2   6   50.20   12.18
   2  -2   6   62.81   12.52
  -2  -2   6   38.94   12.48
   2   2  -6   57.74   12.73
  -2   2  -6   69.01   12.69
  -2   2  -6   62.71   12.98
   2  -2   7   25.86    8.02
  -2  -2   7   17.83    5.47
  -2  -2   7   18.89    7.87
   2   2  -7   21.44    7.86
   2   2  -7   26.35    7.52
  -2  -2   7   12.76    5.38
  -2   2  -7   45.73    8.59
   2  -2   7   20.25    7.57
  -2  -2   7   32.10    7.60
  -2   2  -7   38.69    8.27
  -2   2  -8   56.35   10.81
  -2  -2   8   38.40   10.66
  -2   2  -8   55.19   11.33
   2   2  -8   40.10   11.05
  -2  -2   8   25.02    8.41
   2   2  -8   46.14   10.55
   2  -2   8   46.03   11.12
   2  -2   8   50.23   10.44
  -2  -2   8   26.71    8.46
  -2  -2   8   44.41   10.30
   2  -2   9   73.83   13.90
  -2   2  -9   78.89   14.19
  -2  -2   9   33.79   12.06
  -2  -2   9   40.27   12.08
   2   2  -9   71.48   14.21
  -2   2  -9   94.42   14.80
  -2  -2   9   62.86   13.90
   2  -2   9   58.79   14.34
  -2  -2   9   63.34   14.13
  -2  -2  10  228.49   49.27
  -2  -2  10  145.05   47.98
   2  -2  10  314.43   49.76
   2  -2  10  275.66   49.13
  -2  -2  10  298.49   49.37
  -2   2 -10  339.78   49.38
  -2   2 -10  400.50   50.23
   2   2 -10  328.18   49.53
  -2  -2  10  140.49   47.98
  -2  -2  11    7.18    3.62
   2   2 -11   23.86    8.49
  -2   2 -11   23.84    7.94
  -2   2 -11   31.91    9.75
  -2  -2  11    4.10    3.64
   2  -2  11   18.90    7.34
  -2  -2  11   13.04    7.56
  -2  -2  12  381.75   71.01
  -2  -2  12  215.72   69.48
  -2  -2  12  195.06   69.48
   2  -2  12  419.52   70.73
  -2   2 -12  507.23   71.11
  -2   2 -12  594.11   72.18
   2   2 -12  554.06   71.62
  -2   2 -13  130.78   21.54
  -2  -2  13   61.47   19.09
  -2  -2  13   49.29   19.06
   2  -2  13  125.18   21.24
  -2   2 -13  171.63   23.59
   2   2 -13  124.77   22.27
   2   2 -14  337.32   40.94
   2  -2  14  249.92   39.44
  -2  -2  14   93.82   37.67
  -2  -2  14  113.52   37.68
  -2   2 -14  345.69   41.87
  -2   2 -14  266.73   39.79
  -2   2 -15  151.75   22.08
   2  -2  15  107.08   18.45
   2   2 -15  110.58   20.32
  -2   2 -15   98.87   18.56
  -2   2 -16  169.21   53.84
  -2   2 -16  230.51   55.55
   2   2 -16  242.43   55.04
  -2   2 -17   -2.68    8.94
   2   2 -17  -12.10   12.65
  -2   2 -18   70.00   24.26
   2   2 -18  108.06   26.84
   2   2 -19   16.61   14.66
   2   2 -20   81.50   26.56
  -3   2  20    1.88   15.17
  -3  -2 -20   36.78   17.65
  -3  -2 -20   18.88   13.94
  -3  -2 -19   30.50   16.16
  -3   2  19    2.65   14.29
  -3  -2 -19    7.47   12.67
  -3  -2 -18   14.41   12.37
  -3  -2 -18  -15.82   15.08
  -3   2  18   -7.44   13.45
  -3   2  17   16.96   12.92
  -3  -2 -17    9.28   14.50
  -3  -2 -17   17.72   12.12
  -3  -2 -16  -15.53   12.09
  -3  -2 -16  -18.23   14.51
  -3  -2 -15    3.54   12.04
  -3  -2 -15   51.00   14.50
  -3  -2 -14   42.14   13.95
  -3   2  14    4.63    9.37
  -3  -2 -14   23.02   11.65
  -3  -2 -13  227.83   52.51
  -3   2  13  104.39   51.29
  -3  -2 -13  263.98   53.04
  -3  -2 -12  101.47   21.20
  -3   2  12   48.59   19.04
  -3  -2 -12   97.09   20.81
  -3   2  12   44.83   18.80
  -3   2  12   85.93   19.69
  -3   2  12   34.10   18.75
  -3  -2 -11  363.96   67.82
  -3   2  11  316.11   67.20
  -3   2  11  137.97   66.44
  -3   2  11  145.95   66.46
  -3  -2 -11  353.06   67.73
  -3   2  11  316.21   67.05
  -3   2  11  185.63   66.63
  -3   2  10  164.75   40.05
  -3  -2 -10  210.60   40.99
  -3  -2 -10  166.46   40.65
  -3   2  10   86.83   39.58
   3   2  10  273.71   41.08
   3   2  10  214.35   40.82
  -3   2  10   93.02   39.63
  -3   2  10  107.76   39.79
  -3   2  10  148.66   40.10
  -3   2   9  967.86  235.27
  -3   2   9  513.30  234.93
  -3  -2  -9 1134.99  235.72
  -3   2   9  589.31  234.97
   3   2   9 1307.37  235.72
   3   2   9 1151.38  235.65
  -3  -2  -9 1256.77  235.76
  -3   2   9 1001.79  235.24
  -3   2   9  747.24  235.13
   3  -2  -8  383.62  109.87
  -3   2   8  257.73  109.64
  -3   2   8  346.86  109.85
   3   2   8  586.74  110.32
  -3  -2  -8  527.60  110.45
  -3   2   8  471.29  109.92
   3   2   8  529.59  110.33
  -3  -2  -8  570.12  110.38
  -3   2   8  269.78  109.68
  -3   2   8  464.27  109.87
   3   2   7  728.54  135.76
   3  -2  -7  465.09  135.35
  -3  -2  -7  679.80  135.77
  -3   2   7  487.31  135.47
  -3   2   7  340.64  135.24
  -3   2   7  377.67  135.24
  -3  -2  -7  582.33  135.79
   3   2   7  657.64  135.84
  -3   2   7  531.37  135.36
  -3   2   7  569.35  135.35
  -3   2   6   65.89   20.98
  -3  -2  -6  105.96   21.56
   3  -2  -6   76.78   21.05
  -3  -2  -6   90.40   21.91
  -3   2   6   49.99   21.02
  -3   2   6   73.97   21.27
  -3   2   6   55.38   20.84
   3   2   6  132.43   21.80
  -3   2   6   75.23   20.84
  -3   2   5  322.32   74.91
  -3   2   5  263.74   74.59
   3   2   5  462.87   75.07
  -3   2   5  292.16   74.60
  -3   2   5  121.93   74.54
  -3   2   5  325.69   74.56
   3  -2  -5  249.08   74.58
  -3   2   4  123.00   32.30
  -3   2   4  139.62   32.27
  -3   2   4  123.67   32.72
   3   2   4  156.92   32.67
   3   2   4  153.50   33.08
   3  -2  -4  106.52   32.37
  -3   2   4   44.17   32.37
   3   2   4  163.06   32.62
  -3   2   4  105.15   32.38
  -3   2   3   85.82   27.15
   3  -2  -3   96.20   27.49
   3  -2  -3   80.35   27.13
   3   2   3  132.43   27.27
  -3   2   3  107.21   27.51
  -3   2   3   93.88   26.95
   3   2   3  130.19   27.32
   3   2   3  122.69   27.81
  -3   2   2   85.96   26.27
  -3   2   2   84.30   26.55
   3  -2  -2   90.55   26.31
   3   2   2  113.47   26.99
  -3  -2  -2  133.03   27.14
   3  -2  -2   86.48   26.57
   3   2   2  110.67   26.51
   3   2   2  126.67   26.52
  -3   2   2  110.29   26.98
   3  -2  -2  112.32   26.95
   3  -2  -1    7.72    5.54
  -3  -2  -1   19.15    6.53
   3   2   1   15.67    5.11
   3   2   1   23.19    7.06
   3  -2  -1   12.46    4.92
   3   2   1   19.59    6.38
  -3   2   1   10.83    6.29
  -3   2   1   17.85    5.04
   3  -2  -1   16.40    6.51
   3   2   1   12.33    5.08
   3   2   0    4.60    3.34
   3  -2   0    0.63    5.28
   3   2   0    8.28    5.57
   3  -2   0    5.82    3.50
  -3   2   0    7.86    3.65
   3  -2   0    1.56    4.73
  -3  -2   0   14.32    5.23
   3   2   0   10.88    5.28
  -3  -2   1  101.47   28.32
   3   2  -1   99.35   28.30
   3   2  -1  126.88   28.86
  -3  -2   1  102.78   29.05
  -3   2  -1  123.43   28.56
   3  -2   1  110.64   28.51
  -3  -2   1  135.25   28.98
   3   2  -1  114.44   29.09
   3   2  -2  142.80   35.84
  -3  -2   2  110.99   35.82
   3   2  -2  150.42   36.25
  -3   2  -2  156.60   36.68
   3   2  -2  134.66   36.55
   3  -2   2  140.32   36.10
  -3  -2   2  162.64   36.36
  -3  -2   2  124.79   36.50
  -3   2  -2  171.77   36.20
  -3   2  -3 2070.39  422.53
  -3  -2   3 1811.09  422.19
   3  -2   3 1799.36  422.40
  -3  -2   3 1308.91  421.93
   3  -2   3 1750.00  422.18
  -3   2  -3 1995.78  422.25
   3   2  -3 1691.45  421.98
   3   2  -3 1458.99  422.32
  -3  -2   3 1416.38  422.28
   3   2  -3 1736.94  422.16
  -3  -2   4  856.02  240.14
   3  -2   4 1042.91  240.60
   3   2  -4  956.58  240.25
   3   2  -4  955.85  240.17
  -3   2  -4 1097.53  240.47
  -3   2  -4 1120.25  240.70
   3  -2   4  999.46  240.40
  -3  -2   4  937.94  240.26
   3   2  -4  758.09  240.45
  -3  -2   4  761.37  240.43
   3   2  -5  433.41  110.58
   3  -2   5  479.06  111.05
  -3  -2   5  395.49  110.57
  -3   2  -5  494.11  111.10
   3  -2   5  445.74  110.85
  -3  -2   5  300.39  110.81
  -3  -2   5  414.06  110.57
   3   2  -5  463.24  110.61
  -3   2  -5  552.02  111.01
   3   2  -5  347.84  110.88
   3   2  -6  377.66  119.94
   3  -2   6  519.05  120.08
   3   2  -6  422.83  119.54
  -3   2  -6  562.96  120.18
  -3  -2   6  455.98  119.64
  -3  -2   6  454.70  119.57
  -3  -2   6  336.62  119.82
  -3   2  -6  593.41  120.11
   3   2  -6  504.22  119.70
   3  -2   6  485.44  119.95
   3  -2   7  204.22   46.26
  -3  -2   7   82.26   45.35
   3   2  -7  223.01   45.91
  -3   2  -7  264.09   46.59
  -3  -2   7  197.81   45.82
  -3  -2   7  171.51   45.50
   3  -2   7  209.36   46.21
  -3  -2   7  128.93   46.00
  -3   2  -7  224.93   46.44
   3   2  -7  177.67   46.25
  -3  -2   8  291.68   85.09
  -3   2  -8  477.04   86.13
   3   2  -8  314.92   85.86
  -3  -2   8  261.09   85.62
  -3  -2   8  368.25   85.52
  -3   2  -8  481.61   86.11
   3   2  -8  421.78   85.65
   3  -2   8  406.53   85.93
   3  -2   8  418.11   85.91
  -3  -2   8  201.60   85.00
   3   2  -9  469.00   89.29
   3  -2   9  445.54   89.45
  -3  -2   9  265.58   89.14
  -3  -2   9  297.22   88.54
  -3  -2   9  406.61   89.13
   3  -2   9  441.39   89.53
   3   2  -9  379.36   89.55
  -3  -2   9  207.90   88.45
  -3   2  -9  524.07   89.75
  -3   2  -9  531.67   89.86
  -3  -2  10   83.61   31.76
   3  -2  10  162.47   33.32
  -3  -2  10  141.17   32.85
   3  -2  10  164.59   33.52
  -3   2 -10  189.44   33.67
  -3   2 -10  220.19   34.05
  -3  -2  10  100.39   31.81
   3   2 -10  158.86   33.04
   3   2 -10  129.14   33.43
  -3  -2  11  106.93   36.72
  -3  -2  11  220.90   38.22
   3  -2  11  212.22   38.36
  -3  -2  11  103.88   36.73
  -3   2 -11  275.23   39.41
   3   2 -11  221.23   38.39
  -3   2 -11  226.56   38.65
  -3  -2  12   54.60   12.43
  -3   2 -12   61.56   13.20
  -3  -2  12   19.10    9.03
   3  -2  12   63.54   12.71
  -3   2 -12   84.70   14.64
  -3  -2  12   21.58    9.03
   3   2 -12   64.21   13.12
  -3  -2  13    5.91    3.16
  -3   2 -13   -6.65    9.59
   3   2 -13    3.92    9.11
  -3  -2  13   -1.05    3.05
  -3   2 -13    1.42   10.89
   3   2 -14   -8.57   10.08
  -3   2 -14   20.78    9.60
  -3   2 -14    6.14   11.56
  -3  -2  14    0.49    2.71
  -3   2 -15  -18.96   13.22
   3   2 -15    8.65   10.46
  -3   2 -15    3.60    9.32
  -3   2 -16   30.90   14.81
   3   2 -16    8.63   12.93
  -3   2 -16   31.75   11.95
   3   2 -17   64.28   20.50
  -3   2 -17   50.94   19.28
  -3   2 -17   72.61   22.20
  -3   2 -18   58.23   20.07
   3   2 -18   44.01   18.20
  -3   2 -18   43.24   16.66
   3   2 -19  123.34   36.74
  -3   2 -19  133.25   37.39
  -4   2  19   61.53   24.21
  -4  -2 -19   92.45   26.23
  -4  -2 -19   67.57   24.49
  -4  -2 -18  124.57   33.19
  -4   2  18   95.35   31.11
  -4  -2 -18  107.48   31.79
  -4   2  17  158.61   46.49
  -4  -2 -17  196.90   47.73
  -4  -2 -17  163.43   46.83
  -4   2  16   41.17   21.02
  -4   2  16   45.62   22.39
  -4  -2 -16  122.14   25.49
  -4  -2 -16  112.53   24.21
  -4   2  15  136.35   34.70
  -4   2  15   70.64   33.60
  -4  -2 -15  193.08   36.45
  -4  -2 -15  135.51   35.48
  -4  -2 -14   94.49   26.49
  -4   2  14   42.19   23.66
  -4  -2 -14  120.13   26.05
  -4   2  14  103.87   24.93
  -4   2  13   10.63    8.45
  -4   2  13   15.80   10.63
  -4  -2 -13   29.45   12.76
  -4   2  13    3.80    8.97
  -4  -2 -13   21.41   11.81
  -4  -2 -12  120.92   25.88
  -4   2  12   24.73   23.24
  -4   2  12   71.69   23.76
  -4   2  12   85.94   24.22
  -4   2  12   97.71   23.91
  -4  -2 -12  142.54   26.01
  -4   2  12   43.79   23.49
  -4  -2 -11  182.19   34.42
  -4   2  11  136.87   32.92
  -4   2  11  103.99   32.92
  -4   2  11   53.13   32.43
  -4  -2 -11  135.23   34.15
  -4   2  11  151.02   33.23
  -4   2  11   79.16   32.72
  -4   2  10   36.25   13.64
  -4   2  10   43.84   14.55
  -4  -2 -10   48.43   15.82
  -4   2  10   54.63   13.97
  -4   2  10   40.51   14.18
  -4  -2 -10   64.56   15.82
  -4   2  10   28.56   13.65
   4  -2  -9   14.59    8.92
  -4   2   9   15.20    8.56
  -4  -2  -9   30.18   10.94
   4   2   9   36.81    9.93
  -4  -2  -9   17.69    9.98
  -4   2   9   22.28    8.34
  -4   2   9   22.09    8.60
  -4   2   9   17.82    8.71
  -4   2   9   18.45    9.45
   4  -2  -8   12.74    7.71
  -4  -2  -8   26.39    8.67
  -4   2   8    6.13    6.77
  -4   2   8    2.01    6.84
  -4   2   8   16.66    7.12
  -4   2   8   10.01    6.36
   4   2   8    8.03    7.70
  -4   2   8   25.51    8.16
  -4  -2  -8    2.93    9.10
  -4   2   7    2.56    7.00
   4   2   7   12.52    6.76
  -4   2   7    2.78    6.24
  -4   2   7    2.99    5.47
  -4   2   7   -2.36    6.04
  -4   2   7    3.82    5.14
  -4  -2  -7   15.64    8.27
   4  -2  -7   -2.87    6.02
  -4   2   6   17.50    6.30
   4  -2  -6   11.39    7.24
  -4   2   6   17.52    6.51
  -4   2   6   19.43    8.43
  -4   2   6    8.23    7.18
  -4   2   6    8.26    7.71
   4   2   6   30.67    7.64
   4  -2  -5  229.02   75.99
   4   2   5  369.30   76.27
  -4   2   5   43.39   75.80
  -4   2   5  282.93   75.80
  -4   2   5  313.58   75.81
   4   2   5  370.68   76.71
  -4   2   5  265.20   76.09
  -4   2   5  340.13   76.48
   4   2   5  436.08   76.31
   4   2   4  289.20   49.36
   4   2   4  283.62   49.27
   4  -2  -4  189.59   49.40
   4   2   4  301.00   50.01
   4   2   4  243.11   49.86
  -4   2   4  155.04   48.68
  -4   2   4  141.41   48.65
   4  -2  -4  138.33   49.02
  -4   2   4  195.76   49.56
  -4   2   4  162.61   49.06
  -4   2   3  412.04  149.10
   4  -2  -3  636.41  149.78
  -4   2   3  468.31  149.13
   4   2   3  923.28  150.45
   4   2   3  844.06  149.56
  -4   2   3  529.05  149.48
   4   2   3  896.63  150.15
   4  -2  -3  466.18  149.44
  -4  -2  -3  784.88  150.09
   4   2   3  880.58  149.54
  -4   2   3  620.81  149.84
   4  -2  -2  292.31  109.55
  -4   2   2  346.05  109.57
   4   2   2  594.92  110.50
   4   2   2  620.84  110.75
   4  -2  -2  381.04  110.00
   4   2   2  599.82  109.90
  -4  -2  -2  553.65  110.51
   4   2   2  618.71  109.89
  -4   2   2  492.80  110.40
   4  -2  -2  454.26  110.26
   4  -2  -1  498.77  121.70
   4   2   1  600.07  121.96
  -4   2   1  412.99  121.03
   4   2   1  626.35  121.81
   4  -2  -1  447.26  121.46
   4   2   1  567.42  121.16
  -4   2   1  586.39  121.87
  -4  -2  -1  591.19  121.81
   4   2   1  581.19  121.15
   4  -2  -1  311.38  121.00
  -4  -2   0  364.54   86.51
  -4   2   0  406.21   86.62
   4  -2   0  226.77   85.72
   4  -2   0  334.88   86.24
   4   2   0  387.58   86.59
   4   2   0  537.73   86.66
   4  -2   0  356.54   86.45
  -4   2   0  328.67   85.81
   4   2   0  316.96   85.72
   4   2   0  347.74   85.72
  -4  -2   0  450.83   86.63
   4   2  -1  406.21   68.81
   4  -2   1  437.74   68.82
   4  -2   1  319.10   67.82
   4   2  -1  288.57   67.53
  -4   2  -1  454.76   67.97
  -4  -2   1  496.78   68.80
   4  -2   1  403.55   68.52
   4   2  -1  520.29   68.72
  -4  -2   1  391.24   68.70
  -4   2  -2  510.15   76.12
   4   2  -2  442.27   76.82
   4   2  -2  597.59   76.66
  -4  -2   2  414.47   76.68
  -4  -2   2  240.72   75.50
   4  -2   2  418.47   76.00
  -4  -2   2  545.11   76.71
   4   2  -2  265.02   75.51
  -4  -2   3  178.86   33.81
   4   2  -3  256.70   33.95
   4   2  -3  149.91   34.11
   4   2  -3  127.93   32.74
  -4   2  -3  171.49   33.44
  -4  -2   3   86.73   32.71
  -4  -2   3  141.43   33.92
  -4   2  -3  178.60   34.34
   4  -2   3  146.52   33.30
   4  -2   4  174.51   35.92
  -4  -2   4  122.33   35.48
  -4  -2   4   93.14   34.54
   4   2  -4  124.94   35.70
  -4  -2   4  160.06   35.38
  -4   2  -4  195.13   36.16
   4  -2   4  158.24   35.20
  -4   2  -4  164.04   35.27
   4   2  -4  133.50   34.61
   4   2  -4  168.16   35.32
  -4  -2   5   12.69    8.93
   4   2  -5    4.27    9.56
   4   2  -5   54.52    8.54
  -4  -2   5    7.98    8.04
  -4  -2   5   12.94    6.72
   4  -2   5   20.59    9.25
   4  -2   5    5.01    7.93
   4   2  -5   41.70    7.33
  -4   2  -5   21.89    9.38
  -4   2  -5   16.91    8.51
  -4  -2   6   18.27   11.68
  -4  -2   6   29.23   11.01
   4  -2   6   41.57   12.30
  -4   2  -6   53.53   12.87
   4   2  -6   33.39   10.52
   4   2  -6   35.72   12.18
  -4  -2   6   35.29   10.43
   4  -2   6   43.19   11.66
  -4   2  -6   44.14   11.86
   4   2  -6   36.43   10.88
  -4  -2   7    0.69    4.69
  -4  -2   7   15.81    7.15
  -4  -2   7    6.15    5.17
   4   2  -7   14.10    7.55
   4   2  -7   -2.30    4.95
   4   2  -7    5.74    5.12
  -4   2  -7   -5.09    6.93
  -4   2  -7   -1.60    7.96
   4  -2   7   -5.37    7.35
   4  -2   7   -1.98    6.52
  -4  -2   8   23.06    7.61
  -4  -2   8   18.15    9.25
  -4  -2   8   20.62    7.65
  -4  -2   8    3.66    6.88
  -4   2  -8   29.79    9.83
   4  -2   8   17.19    9.76
   4   2  -8    7.16    9.33
   4  -2   8   29.33    9.21
  -4   2  -8   24.34   10.14
   4   2  -8   26.45    8.06
   4   2  -9  120.15   36.79
  -4   2  -9  165.89   37.19
  -4  -2   9  124.75   35.72
   4  -2   9  153.33   36.66
  -4  -2   9  153.51   36.05
  -4  -2   9   57.25   35.48
  -4   2  -9  204.28   37.13
   4   2  -9  182.53   36.27
   4   2 -10   58.73   18.11
  -4  -2  10   55.41   15.93
  -4   2 -10   77.43   18.30
  -4  -2  10   28.81   15.51
  -4  -2  10   65.48   16.69
  -4   2 -10   58.96   18.31
   4   2 -10   81.26   17.13
  -4  -2  11  328.27   68.08
   4   2 -11  332.32   68.18
   4   2 -11  202.65   68.46
  -4  -2  11  163.64   67.21
  -4   2 -11  398.77   69.10
  -4  -2  11  217.05   67.33
  -4   2 -11  423.11   69.24
  -4   2 -12  156.46   29.85
   4   2 -12  144.52   29.05
  -4  -2  12  108.85   28.43
   4   2 -12  100.15   29.64
  -4  -2  12   55.05   27.20
  -4   2 -12  194.38   30.41
   4   2 -13  268.94   48.68
  -4   2 -13  259.87   49.22
  -4   2 -13  324.71   49.93
   4   2 -14  140.68   36.68
  -4   2 -14  121.18   37.16
  -4   2 -14  145.51   37.67
  -4   2 -15   74.77   26.82
  -4   2 -15  151.04   28.57
   4   2 -15   65.99   26.46
  -4   2 -16  120.69   32.97
   4   2 -16  129.44   32.03
  -4   2 -16   91.17   31.63
   4   2 -17  138.90   38.91
  -4   2 -17  162.61   40.08
  -4   2 -17  125.13   38.80
  -4   2 -18   34.31   18.23
  -4   2 -18   68.94   21.33
   4   2 -18   53.66   19.29
  -5  -2 -17   -2.92   15.03
  -5   2  17    6.17   11.34
  -5  -2 -17    6.78   14.32
  -5  -2 -16    4.56   13.78
  -5   2  16   -5.07   10.97
  -5  -2 -16   -3.75   13.07
  -5  -2 -15   54.56   18.25
  -5   2  15   25.93   14.48
  -5   2  15   36.72   15.42
  -5  -2 -15   66.08   18.06
  -5   2  14   35.68   14.73
  -5   2  14   26.88   14.24
  -5  -2 -14   73.35   17.14
  -5  -2 -14   37.33   16.69
  -5   2  13   23.67   12.68
  -5  -2 -13   55.28   15.17
  -5  -2 -13   40.38   15.13
  -5   2  13   14.94   12.06
  -5  -2 -12  282.06   50.99
  -5  -2 -12  236.47   50.97
  -5   2  12  159.72   49.47
  -5   2  12  123.36   49.54
  -5   2  11   76.07   25.91
  -5  -2 -11  129.70   27.66
  -5   2  11   86.68   26.41
   5  -2 -11   71.23   26.54
  -5  -2 -11  130.89   28.17
  -5   2  10  378.02   80.55
   5  -2 -10  279.32   80.82
  -5   2  10  210.71   80.56
  -5   2  10  243.73   80.67
  -5  -2 -10  487.45   82.24
  -5   2  10  305.01   80.58
  -5   2  10  274.82   80.78
   5  -2  -9   81.45   21.90
  -5   2   9   52.33   20.98
  -5   2   9   70.51   22.23
  -5   2   9   47.20   21.44
  -5   2   9   89.65   20.97
  -5  -2  -9  127.29   23.93
  -5   2   9   33.99   21.22
   5   2   9  138.45   22.58
  -5  -2  -8  342.27   61.67
  -5   2   8  163.32   60.40
   5  -2  -8  211.02   60.48
  -5   2   8  202.30   59.92
  -5   2   8  229.38   59.87
  -5   2   8  204.05   60.29
   5   2   8  375.66   60.87
  -5   2   8  209.55   60.66
  -5   2   7  112.71   36.01
  -5   2   7  119.38   35.69
  -5   2   7   34.64   35.59
  -5   2   7  129.09   35.01
   5  -2  -7  101.55   35.76
   5   2   7  223.39   36.11
  -5   2   7  132.92   35.00
   5   2   7  212.45   36.27
   5   2   6  371.92   60.17
  -5   2   6  247.93   60.18
  -5   2   6  182.65   59.06
   5   2   6  371.34   60.00
  -5   2   6  231.32   59.77
  -5   2   6   36.96   59.42
   5   2   6  346.90   61.15
  -5   2   6  212.00   59.08
   5  -2  -6  199.71   59.68
  -5   2   5  150.28   31.58
   5   2   5  181.01   32.83
   5   2   5  181.97   31.50
  -5   2   5  154.70   32.19
   5   2   5  208.66   31.51
  -5   2   5  103.65   30.36
   5  -2  -5  120.40   31.46
  -5   2   5   84.08   30.34
  -5   2   4  305.22   47.13
   5   2   4  349.71   46.11
   5  -2  -4  279.04   46.84
   5   2   4  346.04   46.27
  -5   2   4  137.03   45.10
  -5   2   4  243.44   46.31
   5   2   4  304.99   47.37
  -5   2   4  132.40   45.10
  -5  -2  -4  399.99   47.83
   5  -2  -4  196.53   46.20
   5  -2  -3   33.53   14.59
   5  -2  -3   46.04   15.41
  -5  -2  -3   59.79   16.07
   5   2   3   55.45   13.91
  -5   2   3   47.01   15.85
   5   2   3   54.69   14.11
   5   2   3   47.43   15.95
   5   2   3   52.04   15.68
   5  -2  -2   10.98    8.60
   5   2   2   26.34    6.96
   5   2   2   23.37    7.11
  -5  -2  -2   15.53   10.13
   5   2   2   33.84   10.06
   5   2   2   24.75   10.17
   5  -2  -2   14.04    9.27
  -5   2   2   20.06   10.11
   5  -2  -1   -3.39    1.54
   5   2   1    2.12    2.78
   5  -2  -1    1.60    6.79
   5   2   1    8.88    2.86
   5   2   1   -1.89    7.52
  -5   2   1    2.24    2.01
  -5   2   1   10.17    8.27
   5  -2  -1    4.90    7.47
   5   2   1   18.88    8.17
  -5  -2  -1   14.87    7.85
  -5  -2   0    4.42    7.98
   5  -2   0    5.73    3.77
  -5   2   0   12.41    4.02
   5  -2   0   21.39    8.33
   5  -2   0   12.76    7.37
  -5   2   0    7.62    8.62
   5   2   0   15.86    7.71
   5   2   0   21.84    8.61
  -5  -2   1   33.00   11.40
   5  -2   1   20.28    8.65
   5  -2   1   28.73   10.93
   5  -2   1   41.51   11.48
   5   2  -1   35.01   11.58
   5   2  -1   49.27   11.05
  -5  -2   1   31.59   11.33
  -5   2  -1   29.90    8.84
  -5   2  -1   36.61   11.95
   5   2  -2  194.25   41.72
   5   2  -2  162.94   42.02
   5  -2   2  139.01   41.67
  -5  -2   2  145.85   41.82
  -5   2  -2  174.97   40.97
  -5  -2   2  190.76   41.92
   5  -2   2  119.25   40.83
  -5  -2   3   13.01    7.79
   5   2  -3   17.36    7.34
   5   2  -3    2.69    8.52
   5  -2   3   10.45    8.73
   5  -2   3    7.44    5.56
  -5   2  -3    8.26    5.96
  -5  -2   3    8.39    8.52
  -5  -2   4  381.30  124.71
   5   2  -4  410.19  124.81
  -5   2  -4  555.55  125.20
   5   2  -4  538.26  124.62
  -5  -2   4  477.33  124.59
  -5   2  -4  544.38  124.44
   5  -2   4  443.46  124.30
   5   2  -5  251.52   37.05
  -5  -2   5  233.74   37.16
   5  -2   5  254.19   36.84
  -5   2  -5  254.51   38.28
   5   2  -5  182.57   37.57
  -5  -2   5  116.79   35.48
   5   2  -5  121.00   35.48
  -5   2  -5  273.98   37.06
  -5  -2   6  267.39   97.26
  -5   2  -6  539.51   99.00
   5   2  -6  394.97   97.33
   5   2  -6  325.61   98.28
   5   2  -6  473.59   98.04
   5  -2   6  466.15   98.04
  -5  -2   6  432.64   98.06
  -5   2  -6  518.73   98.20
  -5  -2   7  201.37   56.02
   5   2  -7  232.85   55.50
   5  -2   7  242.57   56.22
  -5  -2   7  162.66   55.41
  -5   2  -7  250.37   57.05
   5   2  -7  182.22   56.69
  -5   2  -7  286.90   56.48
   5   2  -7  223.51   56.00
   5   2  -8  320.47  104.40
  -5  -2   8  346.33  103.46
   5  -2   8  458.95  104.16
  -5  -2   8  330.65  103.72
  -5   2  -8  473.44  104.80
  -5   2  -8  511.71  104.35
   5   2  -8  454.61  103.57
  -5  -2   9   95.47   29.89
   5   2  -9   85.34   31.33
  -5  -2   9  101.58   30.17
   5   2  -9  139.30   30.11
  -5   2  -9  167.62   32.33
  -5  -2   9   57.97   29.78
  -5   2  -9  153.43   31.49
  -5  -2  10  155.72   50.89
  -5   2 -10  257.61   52.51
   5   2 -10  162.22   52.05
   5   2 -10  252.37   51.18
  -5  -2  10  168.97   50.93
  -5  -2  10  101.06   50.60
  -5   2 -10  306.10   52.34
   5   2 -11   27.40   12.46
  -5   2 -11   27.75   12.03
   5   2 -11   24.95    9.77
  -5   2 -11   20.57   12.84
  -5  -2  11   18.59    8.91
  -5  -2  12   34.59   15.79
   5   2 -12   68.42   17.15
   5   2 -12   51.51   19.00
  -5   2 -12   97.28   19.45
  -5   2 -12   50.02   18.66
  -5   2 -13   -0.76   11.59
   5   2 -13  -15.12   11.50
  -5   2 -13   -2.35   11.32
   5   2 -13   17.19    8.91
  -5   2 -14    0.81   11.78
   5   2 -14   -2.64    9.75
  -5   2 -14    8.93   12.28
  -5   2 -15    0.83   12.38
  -5   2 -15   20.02   13.61
   5   2 -15   -2.32   10.38
  -5   2 -16   39.96   16.41
  -5   2 -16   19.64   15.02
  -5   2 -17    2.97   14.50
  -5   2 -17   -7.02   13.15
  -6  -2 -16   52.46   20.99
  -6  -2 -14   17.74   14.62
  -6   2  14    3.62   10.41
  -6  -2 -13  243.29   44.86
  -6   2  13  101.02   42.31
   6  -2 -12   19.58   10.62
  -6  -2 -12    8.30   13.00
  -6   2  12   -4.85   10.16
   6  -2 -11   39.17   15.62
  -6  -2 -11   35.66   17.94
   6   2  11   77.84   16.80
  -6   2  11   27.92   15.45
   6  -2 -10   10.94    9.94
   6   2  10   20.99   10.81
  -6  -2 -10   12.91   12.04
  -6   2  10    2.43    9.80
   6  -2  -9    2.21    8.53
  -6  -2  -9   -9.14   11.77
   6   2   9   22.74    9.46
  -6   2   9   -4.26    9.16
  -6   2   9   -2.15    4.76
   6  -2  -8   -5.32    8.57
   6   2   8    9.03    8.67
  -6   2   8   -2.44    9.19
  -6   2   8    1.44    3.50
   6   2   8   -3.99    7.87
   6   2   8   11.14   11.74
   6  -2  -7   65.39   15.22
  -6   2   7   80.23   16.27
  -6   2   7   58.63   15.20
  -6   2   7   27.50   11.96
   6   2   7   90.28   17.89
   6   2   7   96.99   14.90
   6   2   7  116.42   15.43
   6  -2  -6   44.15   19.62
   6   2   6   55.32   21.23
  -6   2   6   53.93   19.72
   6   2   6   89.19   19.29
  -6   2   6   75.72   20.87
   6   2   6   78.91   19.49
   6  -2  -5   46.79   24.01
   6   2   5   92.66   23.67
  -6   2   5   63.04   24.23
   6   2   5  121.82   23.69
  -6   2   5   74.37   25.07
   6   2   5   95.53   25.85
  -6  -2  -5  103.03   25.84
  -6  -2  -4   26.42   12.26
   6   2   4   29.44    8.48
   6  -2  -4    5.85    9.94
   6   2   4   17.98   12.24
  -6   2   4   13.13   11.56
   6   2   4   28.00    8.27
   6  -2  -3  295.32  122.70
  -6   2   3  510.34  123.45
  -6  -2  -3  612.55  123.69
   6   2   3  451.14  123.39
   6   2   3  462.23  122.33
   6   2   3  542.17  122.34
   6   2   2   19.11   11.70
   6   2   2   19.98    6.54
  -6   2   2   28.78   12.07
   6  -2  -2   16.22    9.93
  -6  -2  -2   35.60   11.91
   6   2   2   20.08    6.51
  -6   2   1  383.99   89.63
   6  -2  -1  214.83   88.87
  -6  -2  -1  438.67   89.72
   6   2   1  365.45   89.66
  -6  -2   0  199.09   46.84
   6   2   0  167.20   46.74
  -6   2   0  210.92   47.10
   6  -2   0  130.08   46.16
  -6  -2   1  604.05   91.21
   6   2  -1  483.57   91.05
   6  -2   1  408.67   90.60
  -6   2  -1  573.14   91.45
   6  -2   1  239.77   89.23
  -6   2  -1  355.67   89.31
  -6  -2   2  114.79   24.57
  -6   2  -2   89.95   22.39
  -6   2  -2  119.75   25.36
   6   2  -2   54.81   24.29
   6  -2   2   66.45   22.18
   6  -2   2   81.74   23.98
   6  -2   3  353.79  101.73
  -6   2  -3  442.54  101.03
   6   2  -3  368.12  101.97
   6  -2   3  335.41  100.90
  -6  -2   3  458.89  101.90
  -6  -2   4    9.98    8.95
   6  -2   4    5.32    5.79
  -6   2  -4   -0.59    6.21
   6   2  -4    1.94    8.00
   6  -2   4    3.60    9.44
   6   2  -4    0.65    9.59
  -6   2  -5   63.69   16.58
   6  -2   5   23.30   18.01
   6   2  -5   49.55   18.29
  -6  -2   5   50.24   17.58
   6   2  -5   56.81   17.08
  -6   2  -5   89.31   19.43
   6  -2   5   65.29   16.47
  -6  -2   6    5.88    9.11
  -6   2  -6   36.02   11.90
   6  -2   6   13.40    7.70
   6   2  -6    2.70   10.12
   6   2  -6   13.65    8.12
  -6   2  -6    7.51    8.06
  -6  -2   7    8.50    8.70
   6   2  -7   11.79    9.64
   6   2  -7   22.02    8.09
  -6   2  -7    8.49    8.66
  -6   2  -7   14.63   11.77
   6  -2   7    5.43    7.86
   6  -2   8    0.46    8.03
  -6  -2   8    6.37    8.05
  -6   2  -8   -7.91   11.75
  -6   2  -8   10.47    9.14
   6   2  -8   10.01    9.94
  -6   2  -9   56.78   15.69
  -6   2  -9   54.41   17.30
   6   2  -9   23.67   15.87
  -6  -2   9   42.84   14.53
  -6  -2  10   17.58    8.98
   6   2 -10   10.74   11.49
  -6   2 -10   24.20   11.08
  -6   2 -10    0.83   12.52
  -6  -2  11   93.13   34.75
   6   2 -11   90.85   36.16
  -6   2 -11  153.52   37.05
  -6   2 -11  209.01   36.64
   6   2 -12   29.04   16.70
  -6   2 -12   40.01   16.21
  -6   2 -12   55.55   18.06
  -6   2 -13  314.63   66.35
   6   2 -13  147.80   66.04
  -6   2 -13  271.68   66.52
   6   2 -14   36.05   18.55
  -6   2 -14   46.40   18.20
  -6   2 -14   50.23   18.74
  -6   2 -15  270.03   76.93
  -6   2 -15  313.92   76.94
  -6   2 -16   15.65   16.31
  -6   2 -16   38.79   17.20
  -7  -2 -14   97.27   31.63
   7   2  14  108.08   30.75
   7   2  13   -9.80   12.74
  -7  -2 -13  -12.89   15.52
   7  -2 -12   46.05   25.60
   7   2  12  122.51   26.46
  -7  -2 -12  106.36   28.39
   7   2  12   95.52   28.65
  -7   2  12   73.97   25.77
   7  -2 -11    7.41   10.69
  -7   2  11    5.58   11.03
   7   2  11  -10.11   14.91
  -7  -2 -11  -10.12   14.12
   7   2  11   10.85   10.90
  -7  -2 -10  182.52   45.35
   7   2  10  245.45   44.06
   7   2  10  221.02   45.68
  -7   2  10   96.90   43.59
   7  -2 -10   80.79   43.29
  -7   2   9    2.83   10.73
   7   2   9    3.15    9.79
   7  -2  -9    0.63    9.97
   7   2   9   -0.94   14.79
   7   2   8  481.39   97.64
   7  -2  -8  212.03   97.31
  -7   2   8  326.22   97.85
   7   2   8  506.83   99.24
   7   2   7   10.67    8.56
  -7  -2  -7   21.46   13.43
   7  -2  -7    9.66   10.07
   7   2   7   14.04   12.89
  -7   2   7  -11.48   11.63
  -7   2   6  256.97   80.44
   7   2   6  438.84   81.68
   7  -2  -6  153.88   79.71
  -7  -2  -6  454.25   81.78
   7  -2  -5   -7.65    9.48
  -7  -2  -5    8.40   12.38
  -7   2   5  -16.81   11.40
   7   2   5   -3.31   12.34
   7   2   4  157.90   33.92
  -7   2   4  108.60   32.95
   7  -2  -4   64.52   31.91
  -7  -2  -4  153.16   33.81
   7   2   3    6.30   11.39
  -7  -2  -3   -3.95   11.33
   7  -2  -3    2.94    8.84
  -7   2   3    5.23   10.81
  -7  -2  -2   13.02   11.57
   7   2   2   24.74   11.88
   7  -2  -2    0.59    9.13
  -7   2   2   -6.82   10.89
   7   2   1  -11.42   11.28
  -7   2   1    6.91   10.83
   7  -2  -1   -3.62    9.50
  -7  -2  -1   -8.91   11.33
  -7   2   0   74.91   17.66
   7   2   0   10.54   16.25
  -7  -2   0   53.32   17.05
   7  -2   0   48.02   15.92
   7   2  -1   11.23   10.52
  -7  -2   1   10.49   10.48
  -7   2  -1   -5.56   11.41
   7  -2   1   -6.32    9.96
   7   2  -2  173.36   56.03
  -7   2  -2  269.15   56.81
   7  -2   2  146.06   55.65
  -7  -2   2  261.20   56.33
  -7   2  -3   -2.04    4.94
  -7   2  -3  -11.54   12.38
  -7  -2   3   11.19   10.59
   7  -2   3    5.40   10.22
   7   2  -3    8.24   10.21
  -7  -2   4  253.52   61.28
  -7   2  -4  242.40   60.10
   7   2  -4  210.70   61.42
   7  -2   4  208.35   61.43
  -7   2  -5   16.38    7.89
  -7  -2   5   14.86   10.46
   7   2  -5    2.29   10.73
   7  -2   5   11.68   12.08
  -7   2  -6  426.95   89.83
   7  -2   6  263.76   90.58
  -7  -2   6  340.11   90.28
   7   2  -6  239.80   90.35
  -7   2  -6  407.40   91.48
  -7  -2   7    9.87   10.05
  -7   2  -7    3.59   12.88
  -7   2  -7    7.48    8.93
   7  -2   7   11.95   12.53
   7   2  -7    7.92   10.93
  -7  -2   8  330.35   90.25
   7   2  -8  213.79   90.54
  -7   2  -8  415.31   90.29
  -7   2  -8  412.81   91.53
  -7   2  -9   11.57   10.25
  -7  -2   9   -0.54    9.75
   7   2  -9   22.43   12.69
  -7   2  -9    5.65   14.02
  -7   2 -10  211.03   51.97
   7   2 -10  129.93   52.44
  -7   2 -10  236.20   53.61
  -7   2 -11    0.66   11.73
  -7   2 -11  -29.62   15.02
   7   2 -11   -2.64   13.15
  -7   2 -12   18.21   15.28
   7   2 -12  -11.83   14.05
   7   2 -13  -11.29   13.53
  -7   2 -13    9.32   14.46
  -7   2 -13  -14.76   13.75
  -8   2  10   17.65   12.96
   8   2  10  -15.24   16.37
   8  -2  -9   -9.32   11.98
   8   2   9   12.66   15.86
  -8   2   9   15.42   12.74
   8  -2  -8    3.52   10.64
  -8  -2  -8   -3.15   15.01
   8   2   8   -5.12   14.87
  -8   2   8   -2.46   12.44
  -8  -2  -7   11.23   15.27
   8  -2  -7   11.83   12.25
   8   2   7   25.87   15.96
  -8   2   7   39.79   14.74
   8  -2  -6   15.18   11.45
  -8  -2  -6   24.83   13.74
  -8   2   6   -3.35   12.97
   8   2   6    3.87   14.50
  -8  -2  -5  134.32   34.81
   8   2   5  140.76   34.73
   8  -2  -5   65.26   32.72
  -8   2   5  143.32   34.44
  -8  -2  -4  -11.28   13.87
   8  -2  -4    0.69   10.26
   8   2   4   12.02   13.79
  -8   2   4    5.15   12.59
   8  -2  -3  129.97   64.31
   8   2   3  281.85   65.64
  -8   2   3  245.14   65.40
  -8  -2  -3  347.61   66.11
   8  -2  -2   19.55   11.19
   8   2   2   -7.13   13.02
  -8   2   2    9.69   12.62
  -8  -2  -2   17.80   13.76
  -8   2   1  461.39  118.63
  -8  -2  -1  569.86  118.83
   8  -2  -1  296.37  117.81
   8   2   1  503.64  118.82
   8   2   0   40.90   13.34
   8  -2   0    8.67   11.51
  -8  -2   0   24.45   13.96
  -8   2   0  -11.80   13.44
   8  -2   1  124.96   52.92
  -8   2  -1  198.32   54.14
   8   2  -1  257.62   54.43
  -8  -2   1  221.53   53.92
  -8  -2   2   31.14   13.63
   8   2  -2   16.38   13.35
   8  -2   2   12.15   12.61
  -8   2  -2    8.44   14.40
  -8   2  -3  147.04   40.97
   8  -2   3   93.06   39.81
   8   2  -3  142.28   40.35
  -8  -2   3  188.01   40.37
  -8  -2   4   -9.07   12.08
   8  -2   4    9.69   12.10
  -8   2  -4    0.97   13.69
   8   2  -4   12.12   12.64
   8   2  -5   66.31   19.90
   8  -2   5   52.65   19.49
  -8  -2   5   45.55   18.90
   8   2  -6  -12.35   13.29
   8  -2   6   19.06   13.08
  -8  -2   6   12.84   11.80
  -8  -2   7   -2.07   11.42
  -8   2  -7   -6.19   14.51
   8   2  -7   12.53   12.99
   8  -2   7   26.11   13.96
  -8  -2   8   19.39   11.43
   8   2  -8   -1.82   12.85
  -8   2  -8   11.59   15.02
   8  -2   8    4.68   13.49
   8   2  -9   38.03   18.72
   8  -2   9   14.60   18.73
   8   2 -10    6.64   13.61
  -8   2 -10    7.69   15.84
   8  -2  10  -10.13   14.55
   9  -2  -5    1.57   12.42
  -9  -2  -5    3.29   15.23
   9   2   5   10.67   15.67
  -9   2   5    0.97   14.00
   9  -2  -4   48.94   17.93
   9   2   4   28.25   20.75
  -9  -2  -4   64.24   21.43
  -9   2   4   54.00   20.17
   9  -2  -3    3.98   11.64
   9   2   3    4.11   14.82
  -9  -2  -3   11.49   15.35
  -9   2   3    9.95   14.44
   9  -2  -2   16.88   13.93
  -9  -2  -2   48.92   17.42
  -9   2   2   24.23   16.49
   9   2   2   24.30   17.06
   9   2   1    6.00   14.13
  -9  -2  -1   16.91   14.79
   9  -2  -1    7.34   12.09
  -9   2   1   12.29   15.33
  -9  -2   0    0.97   14.45
   9   2   0   -3.96   13.65
   9  -2   0    9.13   11.83
  -9   2   0    2.08   14.81
   9   2  -1   18.69   14.29
  -9  -2   1   12.29   15.22
   9  -2   1    0.85   12.68
  -9   2  -1   20.05   15.19
   9   2  -2   34.28   17.49
   9  -2   2   19.96   16.85
  -9  -2   2   47.97   18.37
  -9   2  -2   48.27   19.14
   9   2  -3   -8.80   14.32
   9  -2   3   -4.45   13.67
  -9  -2   3   -5.39   13.94
   9   2  -4  128.35   46.05
  -9  -2   4  190.85   46.20
   9  -2   4  111.73   45.60
  -9   2  -4  225.23   47.34
   9   2  -5   16.73   14.53
  -9   2  -5   16.93   15.61
   9  -2   5   -9.44   13.87
  -9  -2   5   11.07   13.96
   0   3  21   16.62   16.57
   0  -3 -20  122.47   33.91
   0  -3 -19   -2.00    9.16
   0  -3 -18   73.14   21.63
   0  -3 -17    1.23    8.88
   0  -3 -16  177.88   34.38
   0  -3 -16   78.56   31.72
   0  -3 -15   15.05   11.89
   0  -3 -15    4.46    8.45
   0   3  14  363.85   89.75
   0  -3 -14  302.30   89.61
   0  -3 -14  404.72   90.53
   0   3  13    4.15    7.54
   0  -3 -13    5.80    9.74
   0  -3 -13  -11.48    7.88
   0  -3 -12  331.62   98.06
   0  -3 -12  443.82   98.68
   0   3  12  389.33   98.19
   0  -3 -11    2.20    6.67
   0   3  11   -2.86    6.55
   0   3  11   -7.95    7.62
   0   3  10   87.44   19.77
   0  -3 -10   63.29   19.14
   0   3  10   66.29   19.23
   0   3   9    1.25    6.24
   0  -3  -9   -8.40    5.85
   0   3   9   11.08    5.96
   0  -3  -8  541.64  158.46
   0   3   8  747.69  158.76
   0   3   8  635.26  158.53
   0   3   7   11.96    5.75
   0  -3  -7    3.25    5.33
   0  -3  -6  737.91  194.69
   0   3   6  802.91  194.71
   0  -3  -5    0.81    4.34
   0   3   5    2.31    4.60
   0  -3  -4  602.23  148.43
   0  -3  -4  571.47  148.38
   0   3   2 2675.36  678.04
   0   3   1   -2.13    3.69
   0   3   1   -0.09    2.59
   0  -3  -1    4.30    2.42
   0  -3   0 1205.13  321.44
   0   3   0 1016.64  321.39
   0   3   0 1452.63  321.40
   0  -3   0 1357.91  321.38
   0  -3   1   -1.02    2.95
   0   3  -1   -0.78    3.28
   0  -3   1    0.77    2.85
   0   3  -1   -3.12    2.92
   0   3  -2  639.42  115.38
   0   3  -2  587.73  115.20
   0  -3   2  682.25  115.39
   0  -3   3   -2.74    4.06
   0   3  -3    2.60    2.67
   0   3  -3   -4.71    2.51
   0   3  -3   -4.49    4.45
   0   3  -3    1.22    4.22
   0   3  -4  431.01  105.26
   0  -3   4  305.67  105.45
   0   3  -4  457.23  105.67
   0  -3   5    0.47    2.53
   0  -3   5   -4.62    4.95
   0   3  -5    1.23    2.47
   0   3  -5    5.24    5.06
   0  -3   6   11.83    5.98
   0  -3   6   10.81    3.32
   0   3  -6    4.28    3.27
   0  -3   6    4.66    5.46
   0   3  -6    8.24    5.64
   0  -3   7   10.54    5.84
   0   3  -7   -0.68    2.75
   0  -3   7   -0.56    2.79
   0   3  -7   -1.48    5.71
   0  -3   7    2.43    5.57
   0  -3   8  240.50   67.93
   0  -3   8  260.27   67.34
   0  -3   8  243.68   68.06
   0   3  -8  344.74   68.25
   0   3  -8  251.99   67.35
   0  -3   9   -1.71    3.29
   0   3  -9   -1.02    3.48
   0  -3   9   -6.38    6.49
   0   3 -10  130.70   35.71
   0  -3  10  124.28   36.68
   0   3 -10  183.54   37.09
   0  -3  10  135.21   35.69
   0   3 -11   -6.67    8.31
   0  -3  11    1.59    4.07
   0  -3  11  -10.15    7.90
   0   3 -11    0.73    4.02
   0   3 -12  186.49   57.11
   0   3 -12  338.16   58.86
   0  -3  12  226.62   57.17
   0   3 -13    4.59    4.65
   0   3 -13   -7.24    9.76
   0  -3  13    5.90    5.10
   0  -3  14  578.84  130.74
   0   3 -14  372.74  130.57
   0   3 -14  808.72  132.56
   0   3 -15   -2.00    4.93
   0   3 -15    3.06   11.06
   0   3 -16  752.97  192.65
   0   3 -17   -5.28   12.66
   0   3 -18  145.59   40.86
   0   3 -19   -8.00   14.52
   0   3 -20   -1.06   15.38
  -1   3  20   19.34   16.09
  -1  -3 -20   28.51   13.12
   1  -3 -19   31.32   12.37
  -1   3  19   22.03   17.02
  -1  -3 -19   38.33   13.89
  -1  -3 -18   -3.47   10.22
   1  -3 -18   10.27    8.28
  -1  -3 -17    1.78   12.97
   1  -3 -17    3.48    7.94
  -1  -3 -17    9.98    9.94
  -1  -3 -16   19.97   13.30
   1  -3 -16    9.43    8.54
  -1  -3 -16   19.06   10.56
   1  -3 -15   70.88   26.29
  -1  -3 -15  130.55   27.45
  -1   3  15   95.33   26.85
   1  -3 -14   12.06    7.32
  -1  -3 -14   -0.57    9.21
  -1   3  14   10.24    8.37
  -1  -3 -13  430.01   86.98
  -1   3  13  322.23   86.55
   1   3  13  451.58   86.93
  -1   3  13  347.53   86.53
   1  -3 -13  222.82   86.20
   1   3  12   15.06    8.13
  -1  -3 -12   -1.02    7.66
   1  -3 -12    5.85    6.57
  -1   3  12    3.76    7.18
  -1   3  12   -1.28    6.84
   1  -3 -11  230.62   98.94
  -1   3  11  388.59   99.27
   1   3  11  479.39   99.53
  -1  -3 -11  488.34   99.64
  -1   3  11  491.06   99.67
  -1   3  10    4.40    6.78
  -1   3  10    5.94    6.07
  -1  -3 -10    4.94    6.69
   1   3  10   -6.24    6.87
   1   3  10   12.26    7.49
   1  -3 -10    1.59    5.44
  -1   3  10    5.72    7.71
  -1   3   9  870.46  187.56
  -1   3   9  587.28  187.22
  -1  -3  -9  845.59  187.53
   1   3   9  885.08  187.52
   1  -3  -9  413.08  187.06
  -1   3   9  802.13  187.56
   1   3   9 1033.49  187.76
  -1   3   8    5.54    5.48
  -1   3   8    3.97    6.11
   1   3   8   -4.69    6.34
  -1  -3  -8    5.04    5.85
   1   3   8    9.06    6.15
  -1   3   8    4.25    5.86
   1  -3  -8   -2.77    4.81
  -1   3   7 1285.06  280.47
   1  -3  -7  600.24  280.10
   1   3   7 1450.14  280.66
  -1   3   7 1284.86  280.48
  -1   3   7  810.59  280.20
   1   3   7 1485.44  280.62
  -1  -3  -7 1193.44  280.45
   1   3   7 1227.17  280.45
  -1   3   6   13.58    5.46
   1   3   6    9.37    6.22
   1   3   6    5.99    5.63
   1   3   6    2.17    5.39
  -1   3   6    9.77    5.38
  -1  -3  -6    0.33    5.23
  -1   3   6    0.85    4.85
   1  -3  -6    5.67    4.62
  -1   3   5  265.10   58.17
  -1   3   5  268.99   58.20
   1  -3  -5  118.59   57.88
  -1  -3  -5  253.25   58.23
  -1   3   5  129.34   57.90
   1   3   5  293.22   58.35
   1   3   5  311.60   58.36
   1  -3  -4  178.88   45.64
   1   3   4  267.48   45.92
  -1   3   4  126.61   45.49
  -1   3   4  221.08   45.75
   1  -3  -4  117.38   45.46
   1  -3  -3   48.53   22.84
   1  -3  -3   72.45   22.91
  -1   3   3  105.97   23.04
   1   3   3  119.23   23.17
  -1  -3  -3   88.49   23.06
  -1  -3  -2    9.83    5.47
   1   3   2   16.00    5.33
   1  -3  -2   11.76    5.40
  -1   3   2   11.23    5.32
   1   3   2   11.88    5.37
   1   3   2   14.09    5.60
  -1  -3  -1   37.41   11.25
   1   3   1   47.30   11.20
  -1  -3  -1   42.93   11.29
  -1   3   1   24.75   11.19
  -1   3   1   37.46   11.19
   1   3   1   48.49   11.29
   1  -3  -1   33.44   11.27
  -1  -3  -1   42.68   11.28
   1   3   1   43.45   11.28
   1   3   0  928.05  226.52
  -1   3   0  744.14  226.52
  -1  -3   0 1013.45  226.55
  -1   3   0  910.11  226.57
  -1   3   0  972.92  226.62
   1  -3   0  736.03  226.53
   1   3   0  948.48  226.58
  -1  -3   0  822.37  226.53
  -1  -3   0  847.45  226.54
   1   3   0  964.63  226.57
   1  -3   1  790.17  199.11
  -1   3  -1 1049.51  199.21
   1   3  -1  949.60  199.12
  -1  -3   1  973.60  199.03
   1   3  -1  760.06  199.09
  -1   3  -1 1043.29  199.19
   1   3  -1  859.79  198.99
  -1   3  -1  144.18  198.85
  -1  -3   1  751.95  199.07
  -1  -3   1  713.02  199.07
  -1  -3   2   35.16   13.03
  -1  -3   2   45.34   12.60
   1   3  -2   60.47   13.10
  -1   3  -2   63.14   13.24
  -1  -3   2   29.30   13.08
   1  -3   2   53.78   13.06
   1  -3   2   49.27   13.24
   1   3  -2   39.49   12.60
  -1   3  -2   57.29   13.08
   1  -3   3  845.18  179.65
  -1   3  -3  946.48  179.71
   1  -3   3  740.63  179.73
   1   3  -3  878.49  179.74
  -1  -3   3  687.20  179.66
  -1   3  -3  875.99  179.81
  -1  -3   3  590.29  179.36
   1   3  -3  663.46  179.38
  -1  -3   3  585.19  179.63
   1  -3   4  235.44   61.26
  -1  -3   4  210.27   61.34
  -1   3  -4  271.58   61.30
  -1  -3   4  183.91   61.35
   1   3  -4  285.29   61.46
   1  -3   4  206.13   61.40
  -1   3  -5  974.40  212.49
   1  -3   5  780.86  212.41
   1   3  -5  903.19  212.62
   1  -3   5  720.40  212.59
  -1  -3   5  725.41  212.52
   1  -3   6  132.53   36.51
  -1  -3   6  132.34   36.83
  -1   3  -6  160.46   36.64
   1  -3   6  121.71   36.88
   1   3  -6  147.04   36.84
   1  -3   7 1225.17  326.98
   1  -3   7 1085.84  327.22
  -1  -3   7 1168.14  327.18
  -1   3  -7 1430.28  327.05
   1   3  -7 1412.27  327.30
   1  -3   8   40.79   14.04
  -1   3  -8   52.80   13.22
   1  -3   8   45.24   13.06
   1   3  -8   48.01   14.10
  -1  -3   8   40.05   13.78
  -1   3  -9  825.01  193.43
  -1  -3   9  662.64  193.65
   1   3  -9  851.81  193.87
   1  -3   9  680.72  193.33
  -1   3 -10   -4.31    5.28
   1  -3  10    0.77    5.04
  -1  -3  10   -3.13    6.79
   1   3 -10    3.88    7.17
  -1  -3  11   91.52   19.78
   1  -3  11  215.52   21.61
  -1  -3  11  210.00   23.20
  -1   3 -11  222.74   21.80
   1   3 -11  273.37   24.04
  -1   3 -12    2.45    5.77
  -1  -3  12    0.16    1.93
   1   3 -12   11.07    8.62
   1   3 -12    2.32    1.88
   1  -3  12    0.58    5.68
   1   3 -13    0.10    2.20
   1   3 -13   -5.07    9.42
  -1  -3  13   -4.13    2.44
   1  -3  13   -3.70    6.16
  -1   3 -13   -6.50    6.37
  -1   3 -14   -0.74   10.76
   1   3 -14    7.55    9.95
  -1  -3  14    0.89    2.62
   1  -3  14    5.21    6.52
  -1   3 -14   -4.12    6.25
   1   3 -14    0.11    2.41
  -1   3 -15   25.33   13.67
   1   3 -15   34.06   13.09
  -1   3 -15   19.47    9.31
  -1   3 -16    5.94   12.73
   1   3 -16   23.89   13.05
  -1   3 -16    9.80    7.53
   1   3 -17   50.31   16.85
  -1   3 -17   26.31   16.70
  -1   3 -18   11.61   14.60
   1   3 -18   10.02   13.71
   1   3 -19  156.16   46.83
  -1   3 -19  183.03   47.15
   1   3 -20   12.37   16.35
  -1   3 -20   27.26   16.58
  -2   3  20   88.89   22.41
  -2  -3 -20   30.36   19.25
  -2   3  19   37.17   16.52
  -2  -3 -19   20.59   14.27
  -2   3  18  261.51   52.26
  -2  -3 -18  246.89   51.34
   2  -3 -18   99.09   49.90
   2  -3 -17   14.64    9.11
  -2  -3 -17    3.66   13.81
  -2   3  17   14.68   13.43
  -2  -3 -17   -2.19   11.17
  -2  -3 -16  318.27   67.65
  -2  -3 -16  362.94   68.96
  -2   3  16  360.97   68.31
  -2  -3 -15  120.59   26.15
  -2  -3 -15  108.79   24.59
  -2   3  15  128.45   25.56
  -2   3  15   64.11   23.44
  -2  -3 -14  326.69   60.99
  -2  -3 -14  310.72   60.16
  -2   3  14  316.69   60.38
  -2   3  14  175.91   59.13
  -2   3  13   25.60   10.54
  -2  -3 -13   31.96   12.24
  -2   3  13   21.10    9.99
  -2  -3 -13   31.65   13.06
   2  -3 -13   22.83   10.08
  -2   3  13   33.10   12.67
  -2   3  12   33.12   11.28
  -2  -3 -12   29.85   11.89
  -2   3  12   21.91    9.43
   2  -3 -12    3.62    8.53
  -2  -3 -12   31.98   11.04
  -2   3  12   22.10    8.76
  -2  -3 -11   39.36   11.16
  -2   3  11   29.22   11.20
  -2   3  11   53.85   11.20
  -2   3  11   15.79    9.21
   2  -3 -11   13.79    9.66
   2   3  11   21.24   10.69
  -2   3  11    9.24    9.55
  -2  -3 -11   43.77   12.15
  -2   3  10   -0.85    6.94
  -2   3  10    8.71    5.46
   2  -3 -10    0.41    5.84
  -2   3  10    9.60    7.79
   2   3  10    2.93    7.53
  -2  -3 -10    4.27    7.94
   2   3  10    8.40    7.58
  -2  -3 -10    5.58    7.42
  -2   3  10   -1.15    6.03
   2   3   9    5.71    7.24
   2   3   9   15.65    7.23
  -2   3   9    6.54    6.39
  -2   3   9    5.31    5.05
   2  -3  -9    9.71    5.83
  -2  -3  -9    2.38    7.30
  -2   3   9    5.45    5.86
  -2   3   9    3.30    6.73
   2  -3  -8    7.00    5.39
  -2   3   8    2.22    6.21
  -2   3   8   -2.81    4.45
   2   3   8   11.39    6.35
   2   3   8    8.25    6.68
  -2   3   8    1.39    5.62
  -2   3   8   -2.42    5.26
  -2  -3  -8   -9.35    6.26
  -2   3   7   33.85   13.46
  -2   3   7   46.56   14.14
  -2   3   7   68.71   14.47
  -2   3   7   37.49   13.90
   2   3   7   87.09   14.80
   2   3   7   55.59   14.66
  -2  -3  -7   58.92   14.62
   2  -3  -7   29.36   14.06
   2   3   7   46.45   14.64
   2  -3  -6  169.35  116.77
   2   3   6  663.42  117.35
  -2  -3  -6  595.87  117.41
   2   3   6  646.77  117.36
  -2   3   6  559.31  117.11
  -2   3   6  341.19  116.69
  -2   3   6  321.51  116.89
  -2   3   6  573.62  117.09
   2   3   5  237.89   45.37
   2  -3  -5   74.97   44.92
  -2   3   5  148.22   45.09
   2   3   5  248.07   45.43
  -2   3   5  147.82   44.76
  -2   3   5  224.63   45.22
   2  -3  -4  827.04  212.15
  -2   3   4  573.32  212.13
  -2   3   4  952.62  212.23
   2  -3  -4  754.75  211.94
   2   3   4 1051.74  212.38
   2   3   4 1112.30  212.38
  -2   3   4  774.85  211.95
  -2   3   3   10.76    5.74
   2   3   3   14.95    6.18
  -2   3   3   11.59    5.71
   2  -3  -3   13.21    4.14
   2  -3  -3   13.69    5.43
  -2   3   3   10.80    4.15
   2   3   3   17.06    5.95
  -2   3   3   13.20    5.63
   2   3   3   18.26    6.43
   2   3   2 1430.74  298.96
  -2  -3  -2 1514.35  298.99
  -2  -3  -2 1257.27  298.77
  -2   3   2 1162.53  298.71
   2   3   2 1469.37  298.83
   2  -3  -2  915.55  298.49
   2   3   2 1366.94  298.90
   2  -3  -2 1094.59  298.68
  -2  -3  -1   65.59   16.65
  -2  -3  -1   79.84   16.92
   2  -3  -1   44.22   16.49
   2  -3  -1   53.95   16.23
  -2  -3  -1   50.97   16.90
   2   3   1   79.79   16.69
  -2   3   1   53.93   16.58
   2   3   1   81.91   16.88
   2   3   0  754.48  170.98
  -2  -3   0  805.36  171.02
   2  -3   0  501.94  170.84
  -2   3   0  679.88  170.91
   2   3   0  670.27  170.87
  -2  -3   0  658.48  170.87
  -2  -3   0  654.91  171.03
  -2   3  -1 1074.77  242.48
   2   3  -1  837.12  242.33
   2  -3   1  840.39  242.39
  -2  -3   1 1119.53  242.46
   2   3  -1 1031.92  242.41
  -2  -3   1  736.85  242.30
  -2  -3   1  879.83  242.51
   2  -3   1 1042.00  242.56
  -2   3  -1 1144.16  242.64
   2   3  -2  825.56  208.59
   2  -3   2  862.37  208.76
   2  -3   2  791.32  208.66
  -2   3  -2  934.20  208.83
  -2   3  -2  910.92  208.73
  -2  -3   2  848.30  208.57
   2   3  -2  803.58  208.54
  -2  -3   2  639.05  208.53
  -2   3  -3  454.55   98.42
  -2  -3   3  306.35   98.11
  -2  -3   3  399.33   98.05
   2   3  -3  392.31   98.16
   2   3  -3  367.33   98.01
  -2   3  -3  414.42   98.32
   2  -3   3  385.72   98.32
   2  -3   3  380.44   98.28
   2   3  -4  318.77   77.60
   2  -3   4  288.87   77.67
  -2   3  -4  361.78   77.85
   2  -3   4  329.35   77.77
   2   3  -4  278.29   77.31
  -2  -3   4  281.45   77.58
  -2   3  -4  345.50   77.81
  -2  -3   4  296.39   77.33
   2  -3   5   21.08    6.61
   2   3  -5   17.59    4.30
  -2  -3   5   10.77    4.31
  -2   3  -5   25.31    6.91
   2  -3   5   14.06    6.22
  -2  -3   5   10.66    5.95
  -2   3  -5   15.42    6.39
   2   3  -5   13.18    6.02
   2   3  -6   18.29    7.47
  -2  -3   6   16.80    6.93
   2  -3   6   18.72    7.19
   2  -3   6   15.23    7.50
   2   3  -6   14.50    7.05
  -2   3  -6   23.63    7.70
  -2   3  -6   21.62    7.45
   2  -3   7  170.40   40.50
  -2  -3   7  131.30   40.43
   2  -3   7  139.66   40.68
   2   3  -7  118.38   40.68
  -2   3  -7  174.22   40.64
   2   3  -7  152.64   40.52
  -2   3  -7  193.32   40.95
  -2   3  -8   17.29    7.55
  -2  -3   8   13.94    8.10
   2   3  -8   19.36    8.36
   2  -3   8    8.45    8.20
   2  -3   8   14.71    7.48
  -2   3  -8   21.94    8.92
  -2  -3   8   22.31    7.83
   2   3  -8   24.53    8.10
  -2  -3   9    9.41    7.46
   2   3  -9   12.31    8.17
  -2  -3   9   10.07    7.08
  -2   3  -9   11.59    8.18
   2  -3   9   17.10    6.93
  -2   3  -9   12.46    6.84
   2   3  -9   12.47    7.55
   2  -3   9    8.33    7.64
  -2   3 -10  629.41  135.10
  -2  -3  10  354.28  134.53
  -2  -3  10  470.86  134.58
   2  -3  10  466.44  134.77
   2   3 -10  520.62  134.68
  -2   3 -10  586.57  134.61
   2  -3  10  514.72  134.47
  -2   3 -11   89.10   21.77
   2   3 -11   71.25   20.95
  -2   3 -11   80.24   20.57
   2  -3  11   60.47   20.19
  -2  -3  11   57.64   20.63
   2  -3  12  709.06  203.37
  -2   3 -12  777.94  203.48
   2   3 -12  798.04  203.79
  -2   3 -12  937.13  204.19
  -2   3 -13  161.18   46.54
   2  -3  13  168.84   46.45
   2   3 -13  183.12   47.28
  -2   3 -13  212.74   47.81
   2  -3  14  291.36   82.06
   2   3 -14  320.88   82.84
  -2   3 -14  405.06   83.36
  -2   3 -14  284.86   82.18
  -2   3 -15   95.62   22.55
   2   3 -15   59.93   21.19
  -2   3 -15   58.81   19.95
  -2   3 -16  118.72   33.83
  -2   3 -16  146.11   35.89
   2   3 -16  119.78   35.14
   2   3 -17   11.53   13.79
  -2   3 -17   20.73   10.06
   2   3 -18  106.56   31.61
   2   3 -19   11.26   14.56
   2   3 -20   38.89   18.67
  -3  -3 -19    8.73   12.68
  -3   3  19   -6.28   13.84
  -3   3  18    2.52   13.41
  -3  -3 -18    2.53   11.93
  -3  -3 -17    8.91   11.73
  -3   3  17    2.36   12.56
  -3   3  16   20.48   11.88
  -3  -3 -16  -21.76   11.51
  -3  -3 -15  -11.91   11.29
   3  -3 -15   -0.53    8.04
  -3  -3 -15   -8.21   12.52
  -3   3  15   21.73   11.21
  -3  -3 -14  179.79   29.90
  -3   3  14  145.55   28.65
  -3   3  14   65.34   27.19
  -3  -3 -14  145.16   28.86
  -3   3  13  102.76   21.71
  -3   3  13   35.95   19.96
  -3  -3 -13  130.60   22.95
   3  -3 -13    0.50   19.76
  -3  -3 -13  119.48   22.36
  -3   3  13   56.19   19.73
  -3   3  12  170.67   38.66
  -3   3  12   64.06   37.50
  -3  -3 -12  201.42   39.33
  -3   3  12   81.14   37.41
  -3   3  12  139.74   38.09
  -3  -3 -12  169.99   38.95
  -3   3  11  324.10  123.22
  -3   3  11  566.53  123.89
  -3   3  11  284.66  123.28
  -3  -3 -11  633.19  124.35
  -3   3  11  572.19  123.74
  -3  -3 -10  232.37   45.79
  -3   3  10  197.79   45.09
  -3   3  10  104.03   44.38
  -3   3  10  104.42   44.54
   3   3  10  219.66   45.53
  -3   3  10  173.99   44.88
  -3  -3  -9  974.74  196.87
  -3   3   9  557.27  195.96
   3   3   9  942.53  196.74
  -3   3   9  670.61  196.27
  -3   3   9  866.32  196.37
  -3   3   9  437.77  196.01
   3   3   9 1017.65  196.71
  -3   3   9  879.38  196.32
   3   3   8  550.11  116.16
  -3   3   8  315.41  115.43
  -3   3   8  479.40  115.80
  -3   3   8  388.50  115.77
   3   3   8  554.18  116.22
  -3   3   8  279.31  115.54
  -3  -3  -8  568.10  116.35
   3   3   8  537.80  116.06
  -3   3   8  502.80  115.75
  -3  -3  -7  202.33   43.03
   3   3   7  194.97   42.74
  -3   3   7  138.22   42.00
  -3   3   7  142.85   42.44
   3  -3  -7  141.77   42.05
  -3   3   7  186.05   42.28
  -3   3   7  167.35   42.35
   3   3   7  184.00   42.84
  -3   3   7  111.17   42.20
   3   3   7  188.32   42.69
  -3   3   6  139.45   44.41
   3   3   6  208.71   44.77
  -3   3   6  168.10   44.44
   3   3   6  230.59   44.73
  -3   3   6  193.37   44.36
   3  -3  -6  161.34   44.18
  -3   3   6  150.43   44.57
  -3   3   6  147.42   44.15
  -3   3   5   83.39   45.65
   3   3   5  224.51   45.93
   3   3   5  234.75   46.04
  -3   3   5  190.02   46.02
  -3   3   5  166.09   45.67
  -3   3   5  156.24   45.47
   3  -3  -5  153.44   45.43
  -3   3   5  208.71   45.65
   3   3   4   62.59   16.58
  -3   3   4   61.74   16.12
   3  -3  -4   55.56   16.26
  -3   3   4   68.23   17.03
   3   3   4   86.55   16.92
  -3   3   4   34.57   16.64
   3  -3  -4   50.02   16.03
   3   3   4   86.02   17.41
  -3   3   4   55.58   16.36
  -3   3   3    8.60   17.55
   3   3   3   76.22   17.59
  -3   3   3   77.42   18.18
   3  -3  -3   52.12   17.23
   3   3   3   83.84   17.74
  -3  -3  -3   76.22   18.32
   3  -3  -3   62.21   17.44
   3   3   3   98.72   18.34
  -3   3   3   55.84   17.34
  -3   3   3   69.75   17.32
   3  -3  -2    6.13    6.33
   3  -3  -2    5.99    4.86
  -3   3   2    9.00    5.03
   3   3   2    9.39    5.22
  -3  -3  -2   28.93    6.99
   3  -3  -2    7.82    5.06
  -3   3   2   19.98    6.56
   3   3   2   21.30    6.64
   3   3   1   56.89   13.54
   3  -3  -1   32.11   12.77
  -3  -3  -1   53.22   12.93
   3   3   1   50.78   12.95
   3  -3  -1   62.46   13.85
  -3  -3  -1   59.94   13.60
   3  -3  -1   34.50   12.86
  -3   3   1   47.31   12.89
   3   3   0   13.79    6.06
  -3   3   0   18.40    5.54
  -3  -3   0   12.11    5.23
   3  -3   0   12.90    5.30
  -3  -3   0   13.95    6.54
   3   3   0   11.82    5.19
   3  -3   0   19.71    5.84
  -3  -3   1  184.71   56.34
   3  -3   1  175.07   56.46
   3   3  -1  244.10   56.67
  -3   3  -1  270.74   56.60
   3   3  -1  196.87   56.36
  -3  -3   1  289.50   56.84
   3  -3   2  277.74   76.65
   3   3  -2  312.42   76.67
  -3   3  -2  354.01   76.75
   3   3  -2  266.64   76.90
  -3  -3   2  216.88   76.42
   3   3  -2  286.38   76.49
  -3  -3   2  358.16   76.78
   3  -3   2  330.46   77.00
  -3   3  -2  358.44   77.10
   3  -3   3  597.94  142.48
   3  -3   3  553.35  142.24
   3   3  -3  475.57  142.39
  -3   3  -3  699.31  142.62
   3   3  -3  604.25  142.16
  -3  -3   3  612.12  142.19
  -3   3  -3  639.15  142.32
   3   3  -3  550.35  142.05
  -3  -3   3  393.66  141.97
   3  -3   4  665.20  156.55
   3  -3   4  597.58  156.36
   3   3  -4  526.82  156.48
  -3  -3   4  473.21  156.41
  -3   3  -4  761.91  156.73
   3   3  -4  626.22  156.17
   3   3  -4  644.95  156.16
  -3  -3   4  650.07  156.18
  -3  -3   4  452.55  156.08
  -3   3  -4  727.63  156.48
   3  -3   5 1150.40  273.19
   3   3  -5  879.85  273.12
   3   3  -5 1093.66  272.76
  -3  -3   5  940.19  272.81
  -3   3  -5 1308.58  273.35
   3   3  -5 1102.18  272.88
  -3   3  -5 1251.52  273.18
  -3  -3   5 1102.87  272.77
   3  -3   5 1057.83  273.07
  -3  -3   5  739.27  272.98
  -3  -3   6  344.81   96.04
   3   3  -6  375.64   95.83
   3  -3   6  400.68   96.36
   3  -3   6  412.20   96.42
   3   3  -6  323.77   96.40
   3   3  -6  372.46   96.09
  -3   3  -6  430.65   96.45
  -3  -3   6  365.65   95.84
  -3  -3   6  266.41   96.23
  -3   3  -6  456.72   96.58
   3  -3   7  717.39  141.47
  -3   3  -7  936.77  141.76
  -3  -3   7  617.39  140.64
   3   3  -7  803.29  141.21
  -3   3  -7  900.32  141.72
   3  -3   7  795.52  141.49
  -3  -3   7  704.82  141.09
  -3  -3   7  534.67  141.29
   3   3  -7  590.61  141.42
  -3  -3   8  198.36   56.73
   3   3  -8  319.93   56.70
  -3  -3   8  276.22   56.58
   3   3  -8  235.30   57.00
   3  -3   8  301.73   57.04
  -3   3  -8  350.90   57.21
   3  -3   8  321.85   56.99
  -3  -3   8  150.37   55.72
  -3  -3   8  193.27   55.76
  -3   3  -8  359.84   57.32
   3   3  -9  223.59   43.02
  -3  -3   9  251.95   42.38
  -3  -3   9  120.79   41.04
   3  -3   9  284.18   43.08
   3  -3   9  309.49   42.93
  -3   3  -9  361.50   43.27
  -3  -3   9  128.44   41.05
  -3   3  -9  344.50   43.55
   3   3  -9  311.61   42.64
  -3   3 -10  152.04   36.00
   3   3 -10  112.96   36.09
   3  -3  10  137.52   35.83
   3   3 -10  142.75   35.81
  -3  -3  10  101.00   35.46
  -3   3 -10  147.14   36.31
   3   3 -11   97.61   39.32
  -3   3 -11  183.23   40.00
  -3  -3  11  128.16   38.94
   3  -3  11  154.46   39.11
   3   3 -11  166.28   39.32
  -3   3 -11  148.14   39.33
  -3   3 -12   18.80    9.48
   3   3 -12   -1.06    9.74
   3  -3  12   13.01    9.09
  -3   3 -12   18.30   10.93
  -3  -3  12   18.08    9.14
  -3   3 -13  163.22   46.14
  -3   3 -13  194.47   47.03
   3   3 -13  172.81   46.18
  -3   3 -14    6.29   11.53
  -3   3 -14   -1.69    9.01
   3   3 -14   -0.63    9.79
  -3   3 -15  -16.02   13.28
  -3   3 -15    2.33    9.25
   3   3 -15   10.25   10.88
  -3   3 -16   51.36   15.38
   3   3 -16   11.05   13.75
  -3   3 -16   15.66   12.23
  -3   3 -17  126.79   33.00
   3   3 -17  101.22   32.06
  -3   3 -17  109.96   31.05
   3   3 -18   41.48   19.79
  -3   3 -18   68.41   21.62
  -3   3 -19  107.26   38.30
   3   3 -19  151.58   37.53
  -4  -3 -19   59.73   26.17
   4   3  19   88.90   27.77
  -4   3  19   99.40   26.54
  -4   3  18   72.25   23.14
  -4  -3 -18   67.11   23.43
  -4   3  17  149.22   29.43
  -4   3  17   53.71   27.26
  -4  -3 -17  103.44   29.76
  -4   3  16   71.83   22.76
  -4   3  16   51.05   21.20
  -4  -3 -16  104.87   23.97
  -4   3  15   76.86   19.95
  -4   3  15   39.91   18.47
  -4  -3 -15   72.51   20.86
  -4   3  14   64.94   19.42
  -4   3  14   31.92   18.42
  -4  -3 -14   99.23   20.96
  -4   3  13  179.39   42.13
  -4   3  13  118.88   41.62
  -4  -3 -13  186.41   42.96
  -4   3  12    9.87    7.31
  -4   3  12    6.48    7.99
  -4   3  12    7.49    8.99
  -4   3  12    1.58    8.37
  -4  -3 -12   -0.73   11.27
  -4   3  12   -4.37    7.53
  -4   3  11    6.79    8.80
  -4   3  11    8.29    7.45
  -4  -3 -11    9.83   10.84
  -4   3  11   13.09    8.22
  -4   3  11   18.49    9.10
  -4   3  11    8.07    7.58
  -4  -3 -10    8.04   10.42
  -4   3  10    6.87    6.98
  -4   3  10   10.68    7.42
  -4   3  10   14.28    8.27
   4   3  10   21.73   10.56
  -4   3  10    4.52    7.94
  -4   3  10    2.68    7.34
   4   3   9    4.69    8.55
  -4   3   9   -2.95    7.87
   4  -3  -9    0.37    6.67
  -4   3   9   -7.66    7.08
  -4  -3  -9    4.47    9.41
  -4   3   9    5.00    6.33
  -4   3   9    2.75    6.39
   4   3   9    2.40    7.83
  -4   3   9    0.35    5.91
  -4   3   8   21.99    8.80
  -4   3   8   29.89    9.76
   4   3   8   36.77   10.06
   4   3   8   33.58   10.66
  -4  -3  -8   16.43   11.00
   4  -3  -8   24.29    9.01
  -4   3   8    8.47    9.02
  -4   3   8   28.28    8.81
  -4   3   8   19.45    9.15
  -4   3   7   16.01    7.73
  -4   3   7    3.28    7.02
   4  -3  -7   18.57    7.52
   4   3   7   29.79    9.31
  -4   3   7   22.75    9.07
  -4   3   7   16.63    7.17
  -4   3   7    2.19    7.90
   4   3   7   26.98    8.44
   4  -3  -6  139.33   41.40
  -4   3   6  164.96   42.08
  -4   3   6  138.12   41.40
  -4   3   6   58.34   41.48
  -4   3   6  150.07   41.39
  -4   3   6  178.39   41.38
   4   3   6  202.02   42.01
   4   3   6  237.99   41.95
   4  -3  -5  204.68   59.52
   4   3   5  277.48   59.92
  -4   3   5  250.40   60.18
  -4   3   5   74.82   59.54
  -4   3   5  260.73   59.49
  -4   3   5  204.71   59.50
   4   3   5  310.37   60.40
  -4   3   5  201.61   59.43
   4   3   5  318.46   59.92
  -4   3   4  376.57  101.29
   4   3   4  489.98  101.55
   4   3   4  541.10  101.54
  -4   3   4  449.75  101.88
  -4   3   4  320.65  101.12
   4   3   4  529.51  102.00
  -4  -3  -4  547.95  102.12
   4  -3  -4  327.80  101.27
   4   3   3 1027.80  235.68
   4  -3  -3  790.10  235.43
   4  -3  -3  899.92  235.94
  -4   3   3  699.78  235.40
   4   3   3 1163.80  236.13
   4  -3  -3  800.53  235.57
   4   3   3 1155.96  235.70
  -4   3   3 1060.70  236.13
  -4  -3  -3 1311.09  236.33
  -4   3   2  258.18   73.13
   4  -3  -2  208.27   73.10
   4  -3  -2  287.45   73.78
  -4   3   2  356.84   74.07
   4   3   2  324.37   73.31
   4   3   2  371.29   73.95
   4   3   2  293.19   73.32
  -4  -3  -2  379.57   74.01
   4  -3  -2  244.14   73.37
   4  -3  -1  866.79  206.16
   4  -3  -1  580.26  205.54
   4   3   1  864.42  206.24
  -4   3   1 1008.54  206.36
  -4   3   1  816.66  205.63
   4   3   1  867.15  205.65
   4   3   1 1001.07  206.17
  -4  -3  -1 1018.32  206.25
   4  -3  -1  747.82  205.79
   4   3   1  753.46  205.63
  -4  -3   0  320.55   60.74
   4  -3   0  281.89   60.71
   4  -3   0  172.30   59.86
   4   3   0  292.26   60.54
   4   3   0  191.40   59.85
  -4   3   0  260.33   60.01
   4  -3   0  230.00   60.29
   4   3   0  254.69   60.71
   4   3  -1   74.16   20.78
   4  -3   1   71.93   20.12
  -4  -3   1   64.72   19.35
   4   3  -1   59.48   19.34
   4  -3   1   74.36   19.65
   4   3  -1   93.75   20.33
  -4   3  -1   89.35   19.81
  -4  -3   1   74.07   20.82
  -4  -3   1   99.19   20.64
  -4   3  -2  238.88   51.36
  -4  -3   2  175.50   51.02
  -4  -3   2  160.90   50.19
   4   3  -2  240.87   50.87
   4  -3   2  182.54   50.47
   4   3  -2  161.38   50.21
  -4   3  -2  258.85   50.66
  -4  -3   2  249.03   50.92
   4   3  -2  194.86   51.19
  -4   3  -3  181.45   39.57
   4   3  -3  176.92   38.91
  -4  -3   3  102.17   38.27
   4   3  -3  152.17   39.38
   4   3  -3  143.11   38.36
   4  -3   3  142.08   38.71
  -4   3  -3  172.30   38.88
  -4  -3   3  189.28   39.08
   4  -3   3  177.40   39.45
  -4  -3   3  143.42   39.27
  -4  -3   4   25.50   13.29
   4  -3   4   54.02   13.67
   4   3  -4   28.71   13.33
  -4  -3   4   66.81   12.94
   4  -3   4   41.57   12.64
  -4   3  -4   47.80   12.77
  -4  -3   4   25.75   11.66
  -4   3  -4   52.26   13.65
   4   3  -4   40.04   11.93
   4   3  -4   50.31   12.60
   4  -3   5   58.64   17.24
  -4  -3   5   63.01   16.41
  -4  -3   5   43.23   15.70
   4   3  -5   65.94   16.19
  -4   3  -5   72.77   16.78
   4   3  -5   48.83   17.14
   4   3  -5   58.67   15.87
   4  -3   5   55.09   16.52
  -4  -3   5   47.19   16.88
  -4   3  -5   71.50   17.41
  -4  -3   6    0.22    4.59
   4  -3   6   -1.52    6.27
   4  -3   6    5.30    7.42
  -4  -3   6   -7.00    5.63
   4   3  -6    1.74    4.76
  -4   3  -6   -4.48    6.71
  -4  -3   6    2.95    7.20
   4   3  -6   -0.47    5.02
   4   3  -6   -2.15    7.42
  -4   3  -6   -2.63    8.04
  -4   3  -7   -9.49    7.44
   4   3  -7    5.07    7.41
   4   3  -7   -1.36    5.48
   4   3  -7    0.92    4.70
  -4  -3   7    6.44    5.20
   4  -3   7    2.48    7.42
  -4  -3   7   -0.26    5.10
   4  -3   7   -1.68    6.77
  -4   3  -7   -7.03    8.17
   4   3  -8    8.89    8.96
  -4  -3   8    8.91    5.68
  -4  -3   8   -3.15    5.20
  -4   3  -8   21.21    9.27
  -4  -3   8    9.24    6.49
   4   3  -8   23.55    7.09
   4  -3   8   16.56    8.25
  -4   3  -8   10.97    8.63
  -4  -3   9   76.47   33.67
   4   3  -9  124.43   35.42
   4  -3   9  163.50   35.26
  -4  -3   9  114.09   33.83
  -4   3  -9  191.98   35.76
  -4  -3   9  141.96   34.41
  -4   3  -9  204.54   35.63
   4   3  -9  152.88   34.60
  -4   3 -10  145.34   25.44
   4   3 -10   84.54   24.92
  -4  -3  10  112.81   23.81
  -4  -3  10   69.61   22.60
  -4  -3  10   51.48   22.42
  -4   3 -10  152.11   25.49
   4   3 -10  125.07   24.04
  -4  -3  11   81.21   28.73
   4   3 -11  122.86   31.51
  -4  -3  11  161.94   30.35
  -4  -3  11   85.71   28.77
  -4   3 -11  210.52   31.80
  -4   3 -11  253.37   32.39
   4   3 -11  158.27   30.58
  -4  -3  12  171.42   27.00
   4   3 -12  126.93   28.08
  -4  -3  12   61.42   24.58
  -4   3 -12  192.14   28.35
  -4   3 -12  262.02   29.24
   4   3 -12  190.46   27.41
  -4   3 -13  232.47   53.12
  -4   3 -13  189.88   52.51
   4   3 -13  181.99   52.07
  -4   3 -14  143.53   41.91
   4   3 -14  159.40   41.02
  -4   3 -14  152.62   41.20
   4   3 -15  113.05   33.92
  -4   3 -15  111.89   33.95
  -4   3 -15  147.45   35.16
  -4   3 -16   61.13   25.14
  -4   3 -16   93.56   24.20
   4   3 -16   79.58   24.29
  -4   3 -17   85.75   25.31
   4   3 -17   87.08   23.66
  -4   3 -17   53.26   22.84
  -4   3 -18   38.73   17.65
   4   3 -18   19.31   15.87
  -4   3 -18   31.85   15.05
  -5   3  17  -20.37   12.65
   5   3  17   13.74   14.68
  -5  -3 -17   23.98   14.83
   5   3  16    1.84   13.94
  -5   3  16   -7.98   10.46
  -5   3  16   -3.91   11.36
  -5  -3 -16  -14.50   13.77
  -5   3  15   15.83   12.26
  -5   3  15   27.70   13.09
   5   3  15   31.06   15.87
  -5  -3 -15   46.66   15.92
  -5   3  14   25.45   11.33
   5   3  14   41.88   13.79
  -5   3  14    4.82   10.83
  -5  -3 -14   -3.60   13.48
  -5   3  13   89.42   23.23
  -5   3  13   61.90   22.93
  -5  -3 -13   71.03   24.66
   5   3  13  100.36   24.58
  -5   3  12  160.42   40.89
   5   3  12  174.09   41.96
  -5   3  12   94.70   40.76
  -5  -3 -12  209.29   42.73
  -5   3  11   32.54   14.50
  -5   3  11   21.93   13.44
   5   3  11   72.93   16.18
  -5   3  11   32.59   13.56
  -5  -3 -11   50.46   16.54
  -5  -3 -10  290.07   59.00
   5   3  10  313.56   58.53
  -5   3  10  205.86   57.33
   5  -3 -10  190.31   57.49
  -5   3  10  228.92   57.30
  -5   3  10  148.89   57.26
  -5   3  10  184.40   57.84
  -5   3   9    6.87    8.38
   5  -3  -9   18.99    9.05
  -5   3   9   13.64    9.87
  -5   3   9   15.31    8.35
  -5  -3  -9   21.41   12.28
   5   3   9   42.98   10.46
   5   3   9   24.63   10.55
  -5   3   9    6.50    7.90
   5   3   8  604.38  119.24
  -5   3   8  447.98  119.15
  -5   3   8  413.36  118.46
  -5   3   8  389.31  118.59
   5  -3  -8  395.84  118.64
   5   3   8  644.87  119.16
  -5   3   8  461.52  118.46
  -5   3   7  205.52   59.07
  -5   3   7  203.77   58.79
   5   3   7  331.42   59.55
   5   3   7  306.74   59.67
  -5   3   7  211.96   59.60
   5  -3  -7  183.03   59.03
  -5   3   7  218.89   58.79
   5  -3  -6  188.67   54.87
   5   3   6  284.31   55.29
  -5   3   6  148.84   54.39
  -5   3   6  229.32   55.61
  -5   3   6  208.79   54.89
   5   3   6  314.48   55.31
  -5   3   6  210.14   54.49
  -5   3   5   44.42   11.92
   5   3   5   50.91   13.34
  -5  -3  -5   75.11   15.44
   5   3   5   49.10   12.94
  -5   3   5   30.46   11.75
  -5   3   5   38.56   12.84
   5  -3  -5   34.80   12.80
  -5   3   5   42.75   14.51
   5   3   5   37.69   15.02
   5   3   4  148.56   29.58
  -5   3   4   74.59   28.64
   5   3   4  125.90   31.00
   5  -3  -4   89.59   29.39
  -5   3   4  106.92   28.73
  -5  -3  -4  184.03   31.18
   5   3   4  140.34   29.39
  -5   3   4  120.44   30.46
  -5  -3  -3   10.21    8.99
  -5   3   3    8.60    4.36
   5  -3  -3    6.10    8.30
   5   3   3   -1.78    9.20
   5   3   3   12.58    6.38
  -5   3   3   17.25    8.96
   5   3   3    9.17    5.85
   5  -3  -3   15.85    6.45
  -5  -3  -2   57.94   13.35
   5  -3  -2   39.85   12.35
   5   3   2   39.40   13.19
   5   3   2   40.92   10.56
   5  -3  -2   19.94    9.85
  -5   3   2   26.42    9.84
  -5   3   2   48.12   12.93
   5   3   2   56.52   12.76
   5   3   2   50.01   10.52
   5  -3  -2   33.98   11.30
   5  -3  -1    5.86    3.78
   5   3   1   -1.31    3.83
   5   3   1    0.57    7.96
   5   3   1    4.54    3.95
   5  -3  -1    0.37    6.40
  -5   3   1   -7.34    8.31
  -5  -3  -1   -4.13    7.86
   5   3   1   -0.47    7.43
  -5   3   1   -1.95    3.83
   5  -3   0    5.24    4.83
   5   3   0    9.33    3.66
   5   3   0    4.84    3.57
  -5   3   0   17.12    8.75
   5  -3   0    4.61    7.21
   5   3   0    0.45    7.40
  -5   3   0    4.84    4.92
   5   3   0   25.48    8.99
  -5  -3   0   10.84    8.43
   5  -3   1    0.40    7.15
   5  -3   1    1.05    4.82
   5   3  -1   15.56    2.99
   5   3  -1   11.32    8.33
  -5   3  -1    1.30    5.11
  -5  -3   1   16.44    8.31
   5   3  -1    1.99    2.95
   5   3  -1    3.04    7.42
   5  -3   2  107.13   15.71
  -5   3  -2  161.18   16.26
   5   3  -2  146.74   17.17
   5   3  -2   67.45   14.41
   5  -3   2  111.13   17.23
  -5  -3   2  167.29   17.90
   5   3  -2  132.70   18.22
   5   3  -3   94.66   22.63
  -5  -3   3   59.26   20.30
   5   3  -3   66.70   20.30
  -5   3  -3  155.77   23.79
  -5   3  -3  132.41   21.71
  -5  -3   3  153.59   22.51
   5   3  -3  128.57   22.11
   5  -3   3  112.03   21.49
   5   3  -4  629.98  104.44
  -5   3  -4  699.74  105.40
   5   3  -4  422.36  104.71
  -5  -3   4  644.71  104.51
   5  -3   4  516.01  104.10
  -5   3  -4  649.72  104.29
   5   3  -4  353.68  103.41
  -5  -3   4  280.06  103.39
   5   3  -5  172.24   38.33
   5   3  -5  126.92   39.04
  -5  -3   5   93.02   37.35
   5  -3   5  165.34   38.33
  -5   3  -5  228.39   39.69
  -5  -3   5  227.37   38.67
  -5   3  -5  208.06   38.56
   5   3  -5  130.57   37.43
   5  -3   6  252.09   58.81
  -5  -3   6  140.74   57.95
  -5   3  -6  319.21   59.91
   5   3  -6  144.66   59.03
   5   3  -6  275.77   58.71
  -5   3  -6  317.08   59.12
  -5  -3   6  278.04   58.79
   5   3  -6  217.55   58.09
   5   3  -7  107.45   32.94
   5   3  -7   83.34   33.93
  -5  -3   7   88.17   32.52
   5  -3   7  149.37   33.58
   5   3  -7  152.01   32.77
  -5  -3   7  127.81   33.19
  -5   3  -7  143.41   33.82
  -5   3  -7  157.83   34.63
   5   3  -8  161.71   46.92
   5   3  -8  105.46   47.78
  -5  -3   8  145.07   46.77
   5  -3   8  200.33   47.64
  -5   3  -8  216.20   48.60
  -5  -3   8  170.63   47.03
  -5   3  -8  241.61   48.00
   5   3  -8  208.38   46.98
  -5  -3   9   36.09   34.07
   5   3  -9   96.70   35.79
  -5  -3   9  136.93   34.48
  -5  -3   9  128.55   34.49
  -5   3  -9  161.08   36.33
  -5   3  -9  197.54   36.02
   5   3  -9  174.28   34.76
  -5   3 -10  109.55   22.06
   5   3 -10   66.31   20.09
   5   3 -10   65.89   21.79
  -5  -3  10   52.94   19.36
  -5   3 -10   90.70   22.25
  -5   3 -11   55.40   15.66
  -5   3 -11   54.37   15.77
   5   3 -11   40.60   15.77
   5   3 -11   45.34   13.57
  -5  -3  11   28.93   12.03
  -5   3 -12   27.40   11.43
   5   3 -12   -3.21   11.33
   5   3 -12    0.90    8.44
  -5   3 -12   12.85   11.83
   5   3 -13   -0.84   11.93
  -5   3 -13   20.95   12.77
  -5   3 -13   14.76   12.37
   5   3 -13   17.40    9.69
   5   3 -14    4.92    9.86
  -5   3 -14   -5.59   11.58
  -5   3 -14   -0.83   12.56
   5   3 -14   12.35   12.58
   5   3 -15   -1.19   10.72
  -5   3 -15    5.74   12.57
  -5   3 -15   19.57   13.65
  -5   3 -16   21.88   14.68
  -5   3 -16   30.35   15.72
  -5   3 -17    9.07   14.63
  -5   3 -17    5.18   13.13
   6   3  16   24.32   15.65
  -6  -3 -16    4.30   15.81
   6   3  15  203.33   45.13
  -6  -3 -15  121.89   44.97
   6   3  14   27.01   14.09
  -6   3  14    1.33   11.48
  -6  -3 -14   29.25   15.61
   6   3  13  134.73   31.01
  -6   3  13   55.24   29.41
  -6  -3 -13  142.40   31.96
   6   3  12   50.77   16.38
  -6   3  12   21.23   15.02
  -6  -3 -12   57.51   18.32
  -6   3  11   11.23   11.63
   6  -3 -11   15.38   11.38
   6   3  11   32.52   12.99
  -6  -3 -11   32.77   15.22
   6   3  10   10.13   10.62
  -6   3  10   -1.32   10.35
  -6  -3 -10   12.30   12.72
   6  -3 -10    4.19    8.89
   6   3   9   -4.34    9.22
  -6   3   9    3.28    9.41
  -6   3   9    4.14    5.80
   6  -3  -9   -1.00    8.24
   6  -3  -8   14.95    9.14
   6   3   8   12.23   12.74
   6   3   8   27.96    9.91
  -6   3   8    3.65    5.60
  -6   3   8   20.99   10.87
  -6   3   8   10.33    8.67
   6  -3  -7   61.12   17.40
   6   3   7  108.40   18.13
  -6   3   7   66.83   18.76
   6   3   7  105.64   17.84
  -6   3   7   69.67   17.54
  -6   3   7   26.95   15.47
   6   3   7   84.19   20.46
   6   3   6   39.12    8.73
   6   3   6   29.47    9.12
   6  -3  -6   10.48    8.73
  -6  -3  -6   39.40   12.92
  -6   3   6    7.17    4.85
  -6   3   6   15.31    9.00
   6   3   6    0.76   12.01
  -6   3   6   19.68   11.07
   6  -3  -5  121.10   24.94
  -6   3   5   56.09   22.86
   6   3   5  205.51   24.99
   6   3   5  229.95   24.92
  -6   3   5   68.91   22.87
  -6   3   5  184.75   26.92
  -6  -3  -5  237.86   27.89
   6   3   5  186.80   27.52
   6   3   4   27.32   11.28
   6  -3  -4   -0.45    7.33
   6   3   4   18.31    6.83
   6   3   4   17.50    6.24
  -6   3   4    3.30   10.61
  -6   3   4    5.51    2.08
  -6  -3  -4   11.94   10.77
  -6   3   4    2.54    2.05
   6  -3  -3  231.70   88.94
   6   3   3  304.25   88.65
  -6   3   3  376.72   89.90
   6   3   3  400.30   88.69
  -6  -3  -3  491.45   90.28
   6   3   3  334.58   89.93
  -6   3   2   23.85    8.68
   6  -3  -2   50.94   12.20
  -6   3   2   23.79    8.68
   6   3   2   40.58    9.68
   6   3   2   73.84   14.43
   6   3   2   61.22    9.82
  -6   3   2   73.03   14.68
   6  -3  -1  173.24   53.34
  -6   3   1  410.73   56.33
   6   3   1  171.28   53.41
   6  -3  -1  299.33   54.94
   6   3   1  326.17   56.02
   6   3   1  255.84   53.45
  -6   3   1  167.04   53.37
  -6  -3  -1  464.94   56.27
   6  -3   0   49.12   17.20
  -6  -3   0  104.70   20.58
  -6   3   0   58.18   17.24
  -6   3   0  116.45   21.19
   6   3   0   66.20   20.49
   6  -3   0   75.15   19.36
   6  -3   1  259.98   91.34
   6   3  -1  370.45   92.87
  -6   3  -1  472.29   93.18
  -6   3  -1  344.75   91.44
  -6  -3   1  514.26   92.88
   6  -3   1  392.41   92.36
   6   3  -2   -0.68   10.71
   6  -3   2    5.24    9.24
  -6  -3   2   11.67    9.96
  -6   3  -2   11.75    6.07
   6  -3   2    7.85    5.67
   6  -3   3  134.97   35.40
   6   3  -3  159.78   35.27
   6  -3   3   97.48   34.05
  -6  -3   3  181.44   35.65
  -6   3  -3  141.26   34.31
   6   3  -3   67.42   35.57
  -6   3  -4   21.22   11.85
  -6   3  -4   20.18    8.56
   6  -3   4   13.83    8.02
   6   3  -4    9.94    9.33
   6   3  -4   17.25   10.85
  -6  -3   4   23.54   10.43
   6  -3   4   27.28   11.14
  -6   3  -5   -1.51    6.96
  -6  -3   5    7.35    8.83
   6   3  -5   -3.19    7.68
   6  -3   5    6.06    6.82
  -6   3  -5   -4.48   10.81
   6   3  -5    1.41   10.03
  -6   3  -6   -0.43    7.47
  -6  -3   6    1.41    8.26
   6   3  -6    2.88    9.41
   6  -3   6   -1.20    7.22
  -6   3  -6   -8.39   10.88
   6   3  -6    9.17    7.30
  -6   3  -7   32.28   11.23
   6   3  -7   31.75   12.46
  -6  -3   7   17.87   11.10
   6  -3   7   26.12   10.84
  -6   3  -7   31.22   13.66
  -6   3  -8   76.11   17.31
  -6   3  -8   65.50   18.80
  -6  -3   8   39.42   15.95
   6   3  -8   34.21   17.57
  -6  -3   9   56.80   19.72
  -6   3  -9   88.37   22.66
   6   3  -9   43.22   21.36
  -6   3  -9   94.43   21.30
   6   3 -10  -14.65   11.67
  -6   3 -10    1.68   12.37
  -6   3 -10    0.63   10.43
  -6  -3  10   -1.12    7.43
   6   3 -11  125.86   51.42
  -6   3 -11  217.52   52.19
  -6   3 -11  221.54   51.44
  -6   3 -12    3.68   11.60
   6   3 -12   -7.02   12.83
  -6   3 -12    7.93   12.58
   6   3 -13   98.60   47.31
  -6   3 -13  230.39   47.67
  -6   3 -13  177.00   47.66
   6   3 -14   43.72   18.29
  -6   3 -14   64.47   18.72
  -6   3 -14   20.36   17.76
  -6   3 -15   97.85   31.22
  -6   3 -15  108.93   31.34
  -7  -3 -13   -8.74   15.84
  -7   3  13   -4.47   11.91
   7   3  13    9.16   12.48
   7   3  12  117.95   34.18
  -7  -3 -12  149.45   36.10
  -7   3  12   83.03   34.09
   7   3  12  153.52   37.16
   7   3  11  -21.44   12.11
  -7  -3 -11    6.17   14.52
  -7   3  11  -12.00   12.18
   7   3  11   -5.14   15.37
   7   3  10  220.78   47.94
   7  -3 -10  146.47   47.47
   7   3  10  176.75   49.68
  -7   3  10  167.78   48.13
   7   3   9   11.52   13.99
   7  -3  -9   12.13    9.98
   7   3   9   18.28   10.54
  -7   3   9   -2.26   11.89
   7   3   8  310.39   69.62
   7  -3  -8  192.18   69.34
   7   3   8  354.14   71.52
  -7   3   8  236.89   70.12
   7   3   7    6.31   12.74
   7  -3  -7    1.11    8.84
  -7  -3  -7   15.36   12.67
  -7   3   7  -12.92   12.16
   7   3   7    2.98    8.66
   7   3   6  284.88   64.72
  -7   3   6  233.58   63.78
   7  -3  -6  169.06   62.81
  -7  -3  -6  318.49   64.76
   7   3   5    6.84   12.92
   7  -3  -5   18.43    9.90
  -7  -3  -5    6.77   12.94
  -7   3   5   23.04   12.46
   7  -3  -4   68.33   32.53
  -7  -3  -4  131.82   34.29
   7   3   4  146.14   34.74
  -7   3   4  154.64   34.29
   7  -3  -3   -0.55    8.79
   7   3   3   -7.37   11.99
  -7  -3  -3    2.38   11.94
  -7   3   3  -21.84   12.24
   7  -3  -2    1.66    8.69
  -7  -3  -2    0.77   11.32
   7   3   2   -0.81   11.02
  -7   3   2    7.87   10.90
   7   3   1    0.80   11.08
  -7  -3  -1    9.64   11.40
   7  -3  -1   14.16    9.15
  -7   3   1    5.57   12.11
   7   3   0  141.39   42.67
  -7   3   0  180.54   42.88
  -7  -3   0  191.32   42.73
   7  -3   0  112.99   41.61
  -7  -3   1   27.01   11.80
   7  -3   1    3.01    9.44
   7   3  -1    7.08   11.79
  -7   3  -1    8.17   12.33
  -7   3  -2  249.66   56.74
   7   3  -2  144.03   56.08
  -7  -3   2  289.24   56.32
   7  -3   2  154.76   55.51
   7  -3   3   13.64   10.53
  -7   3  -3    8.92    6.30
   7   3  -3   -3.16   11.49
  -7  -3   3    2.59   10.45
   7   3  -4  118.86   42.08
  -7  -3   4  167.11   41.53
  -7   3  -4  168.01   40.26
   7  -3   4  139.71   41.65
  -7  -3   5    1.80   10.60
  -7   3  -5   13.45    8.36
   7   3  -5   16.96   11.45
   7  -3   5    4.96   11.65
  -7   3  -5   31.48   13.99
   7   3  -6  243.09  102.13
  -7   3  -6  520.68  103.35
  -7  -3   6  411.31  101.98
  -7   3  -6  445.23  101.62
   7  -3   6  329.19  102.22
  -7  -3   7    9.98   10.25
  -7   3  -7    7.04    9.37
  -7   3  -7   11.82   13.31
   7  -3   7    9.36   12.50
   7   3  -7   11.73   12.11
   7   3  -8  167.17   73.81
  -7  -3   8  269.17   73.06
  -7   3  -8  321.85   73.21
  -7   3  -8  349.17   74.67
  -7   3  -9  -16.12   13.41
   7   3  -9   -5.28   12.80
  -7  -3   9    6.04    9.43
  -7   3  -9  -14.98   10.97
   7   3 -10   56.06   34.34
  -7   3 -10  131.88   35.40
  -7   3 -10  159.48   34.03
   7   3 -11    1.86   13.15
  -7   3 -11    4.95   14.24
  -7   3 -11  -16.45   12.02
   7   3 -12    1.92   14.65
  -7   3 -12   25.19   13.58
  -7   3 -12   27.34   16.32
   7   3 -13    3.97   13.92
  -7   3 -13   -8.77   13.51
  -7   3 -13  -14.49   15.56
   8   3  10   -1.11   15.44
  -8   3  10    5.11   12.84
   8   3   9   17.26   16.19
  -8   3   9   -4.29   13.48
  -8  -3  -8   10.59   15.08
  -8   3   8   24.19   13.78
   8   3   8   -1.05   15.63
   8   3   7   49.03   23.65
  -8  -3  -7  105.92   24.39
  -8   3   7   46.14   22.18
   8  -3  -6    8.29   10.05
   8   3   6    5.98   14.31
  -8  -3  -6    1.00   13.54
  -8   3   6    9.65   13.06
   8   3   5  143.32   39.68
  -8  -3  -5  176.57   39.66
   8  -3  -5   97.54   37.56
  -8   3   5  145.05   38.89
   8  -3  -4    1.92    9.82
  -8  -3  -4   16.96   13.53
   8   3   4   -6.69   13.73
  -8   3   4  -16.96   13.36
  -8   3   3  194.67   48.07
   8   3   3  162.57   48.30
   8  -3  -3  125.41   46.37
  -8  -3  -3  220.47   48.16
   8  -3  -2    2.62   10.86
   8   3   2    4.63   13.90
  -8  -3  -2   10.66   13.17
  -8   3   2   36.44   13.81
   8   3   1  269.30   76.26
  -8   3   1  292.20   76.25
   8  -3  -1  178.60   74.97
  -8  -3  -1  417.33   76.61
   8   3   0    5.45   13.43
  -8   3   0    2.80   13.18
  -8  -3   0    5.02   12.33
   8  -3   0   -6.85   10.36
   8  -3   1  123.31   45.01
   8   3  -1  160.10   46.35
  -8  -3   1  194.06   46.18
  -8   3  -1  196.84   46.69
   8  -3   2   13.81   11.23
   8   3  -2   -2.71   12.72
  -8  -3   2   -3.94   11.91
  -8   3  -2  -16.32   14.14
   8   3  -3   44.37   23.19
  -8  -3   3   87.74   22.43
   8  -3   3   59.40   21.66
  -8   3  -3   76.04   23.67
   8   3  -4    6.37   13.04
  -8  -3   4   -1.48   11.32
   8  -3   4   -6.24   11.87
  -8  -3   5   13.57   11.97
   8   3  -5    2.75   13.01
   8  -3   5   14.59   13.01
   8  -3   6   -0.84   12.39
   8   3  -6    0.93   13.23
  -8  -3   6  -11.72   11.44
  -8   3  -6   12.31   14.81
  -8   3  -7   34.47   15.90
   8   3  -7   17.92   14.33
  -8  -3   7    1.33   11.93
   8  -3   7   31.63   14.73
  -8   3  -8   20.22   14.75
   8   3  -8   -6.71   13.24
   8  -3   8  -18.32   13.97
   8   3  -9   53.81   18.17
   8  -3   9   32.50   18.05
  -8   3  -9   31.45   19.11
   8   3 -10   13.00   14.22
  -8   3 -10   13.26   15.94
   8  -3  10    1.00   14.70
  -9  -3  -4   51.36   19.54
   9   3   4   32.42   19.31
  -9   3   4   26.42   18.11
   9   3   3    1.06   15.56
  -9   3   3    2.05   14.82
  -9  -3  -3  -15.63   15.09
   9  -3  -2   -0.76   11.89
   9   3   2   19.96   15.52
  -9  -3  -2    6.09   15.12
  -9   3   2   14.55   15.19
   9   3   1   -2.08   14.65
  -9  -3  -1   24.69   15.14
  -9   3   1  -32.62   16.74
   9  -3  -1   -6.95   11.70
  -9   3   0   23.43   15.61
   9  -3   0   -5.52   12.55
   9   3   0    4.12   14.53
  -9  -3   0   26.91   15.33
  -9   3  -1   17.28   14.84
  -9  -3   1   -0.94   14.36
   9   3  -1  -13.33   14.58
   9  -3   1  -12.13   12.42
  -9   3  -2   89.79   25.98
  -9  -3   2   89.05   24.92
   9  -3   2   72.29   23.56
   9   3  -2   39.89   24.59
   9  -3   3    7.71   12.99
  -9   3  -3   -2.22   15.17
   9   3  -3   23.53   14.53
  -9  -3   3   -6.18   14.02
   9  -3   4   77.80   29.62
   9   3  -4   65.66   30.20
  -9  -3   4  136.16   30.31
  -9   3  -4  101.50   31.28
   0  -4 -20  131.17   42.16
   0   4  20  193.27   44.83
   0  -4 -19   -5.82   10.10
   0   4  19   -2.00   14.81
   0  -4 -18  100.85   35.56
   0   4  18  172.52   37.97
   0   4  17   -4.42   13.37
   0  -4 -17    2.02    8.92
   0   4  16  239.35   50.91
   0  -4 -16  151.55   49.17
   0   4  15    2.32   11.84
   0  -4 -15   16.53    9.22
   0  -4 -14  182.83   57.30
   0   4  14  267.61   58.32
   0  -4 -13   -2.21    7.64
   0   4  13    6.01   10.59
   0  -4 -12   81.92   23.26
   0   4  12   91.96   24.11
   0   4  12   72.93   23.23
   0  -4 -11    5.90    7.10
   0   4  11   -3.18    7.02
   0   4  11   -3.41    8.67
   0   4  10   -1.57    7.68
   0   4  10   -4.78    7.24
   0  -4 -10   -0.92    6.54
   0   4  10   -1.28    6.52
   0   4   9   -1.43    7.45
   0   4   9   -2.81    6.16
   0   4   9   -0.88    6.63
   0  -4  -9    0.87    5.98
   0   4   8   39.89   13.71
   0   4   8   56.87   14.18
   0  -4  -8   45.60   13.66
   0  -4  -7   -0.38    5.41
   0   4   7    2.46    5.39
   0   4   6  726.91  188.37
   0  -4  -6  751.91  188.40
   0  -4  -5   -0.61    5.37
   0  -4  -5    1.60    4.63
   0  -4  -4  823.41  209.18
   0   4   3    3.57    3.31
   0   4   2  297.77  113.37
   0   4   2  518.01  113.30
   0  -4  -1   -6.82    3.92
   0  -4  -1    4.08    2.81
   0   4   1    0.21    4.12
   0   4   1   -1.43    2.79
   0  -4   0  224.38   57.76
   0   4   0  202.79   57.74
   0   4   0  239.10   57.67
   0  -4   0  231.81   57.65
   0  -4   1    0.48    3.49
   0  -4   1   -1.07    3.46
   0   4  -1   -4.47    3.34
   0   4  -1    0.98    3.78
   0   4  -2 1696.54  259.18
   0   4  -2 1190.56  258.84
   0  -4   2 1131.01  258.81
   0   4  -2 1031.04  258.70
   0  -4   2  610.88  258.62
   0   4  -3    1.59    3.17
   0   4  -3    1.64    4.40
   0   4  -3    3.09    3.21
   0  -4   3   -0.22    4.18
   0   4  -3   11.05    4.90
   0  -4   4  104.80   34.29
   0   4  -4   90.09   33.88
   0   4  -4  171.66   34.04
   0   4  -4  162.67   34.59
   0   4  -5    1.70    2.69
   0  -4   5   -0.30    4.78
   0   4  -5    4.96    3.11
   0   4  -5   -3.34    5.04
   0   4  -6   78.04   13.97
   0  -4   6   71.64   15.31
   0   4  -6   76.86   15.22
   0  -4   6   67.36   15.09
   0  -4   7    4.14    5.90
   0   4  -7   -0.73    2.88
   0  -4   7   -2.66    5.96
   0   4  -7   -4.49    6.42
   0  -4   8  174.01   45.92
   0  -4   8  161.53   45.06
   0  -4   8  171.13   45.99
   0   4  -8  240.56   46.29
   0   4  -8  176.86   45.10
   0  -4   9   -6.40    7.03
   0  -4   9   -2.22    2.90
   0   4  -9    2.27    3.07
   0  -4   9   11.32    6.81
   0   4  -9   -3.94    7.33
   0  -4  10  130.80   34.87
   0   4 -10  125.76   34.88
   0  -4  10  133.71   36.17
   0  -4  10  139.70   36.19
   0   4 -10  205.84   36.69
   0   4 -11    0.58    8.38
   0  -4  11    1.66    3.43
   0   4 -11   -0.78    3.40
   0   4 -12  346.41   97.80
   0  -4  12  378.36   97.82
   0   4 -12  598.17   99.58
   0   4 -13   -3.91    3.76
   0  -4  13   -1.73    4.06
   0   4 -13  -10.27   10.64
   0  -4  14  354.06   78.58
   0   4 -14  218.58   78.43
   0   4 -15   -7.12   11.90
   0   4 -16  198.96   53.24
   0   4 -17   -9.04   13.75
   0   4 -18   75.05   24.73
   0   4 -19   -5.11   14.90
   0   4 -20    5.41   15.22
  -1   4  20   26.90   15.95
  -1  -4 -20  -13.71   12.15
   1   4  20    6.53   16.48
   1  -4 -19   14.53   12.92
  -1   4  19   54.65   18.41
  -1  -4 -19   44.35   15.48
  -1   4  18   23.85   14.18
   1  -4 -18    0.67    9.05
  -1  -4 -18    3.74   10.89
  -1   4  17   11.19   13.22
   1  -4 -17   11.55    9.20
  -1  -4 -17    2.87   10.66
  -1   4  16   -9.66   13.00
   1  -4 -16   10.46    8.74
  -1   4  15  128.35   25.59
  -1  -4 -15   96.80   24.26
   1  -4 -14   23.56   13.58
  -1   4  14   53.05   16.33
  -1  -4 -14   54.73   15.00
  -1   4  13  307.35   60.27
  -1   4  13  236.78   59.13
  -1   4  13  185.58   59.26
  -1  -4 -13  278.33   59.78
   1  -4 -13  139.85   59.04
  -1   4  12   27.55   14.67
   1  -4 -12   36.45   14.32
  -1   4  12   59.79   15.99
  -1  -4 -12   59.14   15.52
   1   4  11  567.15  125.59
  -1   4  11  612.61  125.88
  -1   4  11  387.98  125.29
   1  -4 -11  326.22  125.13
  -1  -4 -11  561.60  125.66
  -1   4  11  579.34  125.72
   1   4  10   -1.97    7.61
  -1   4  10   -6.06    8.06
  -1   4  10   -0.42    6.49
   1  -4 -10   11.31    6.24
   1   4  10   -5.40    8.74
  -1  -4 -10    2.97    6.85
   1   4  10   -7.74    7.35
  -1   4  10    5.10    7.12
  -1  -4  -9  704.70  172.58
   1   4   9  767.98  172.74
  -1   4   9  801.46  172.71
  -1   4   9  782.72  172.63
   1   4   9  715.20  172.54
  -1   4   9  515.30  172.33
   1  -4  -9  412.50  172.18
   1   4   9  892.36  172.80
   1   4   8   85.18   18.74
   1  -4  -8   28.05   17.60
  -1   4   8   56.46   17.91
  -1  -4  -8   80.37   18.25
   1   4   8   81.82   18.36
  -1   4   8   57.09   18.26
   1   4   8   68.39   18.28
  -1   4   8   71.44   18.18
  -1   4   7  784.41  178.10
   1   4   7  761.70  178.11
  -1   4   7  771.21  178.11
   1   4   7  942.28  178.30
  -1  -4  -7  759.71  178.13
  -1   4   7  469.89  177.82
   1   4   7  849.74  178.26
   1  -4  -7  452.13  177.78
  -1   4   6   18.52    6.98
   1  -4  -6   10.56    6.76
   1   4   6   23.71    7.64
   1   4   6   25.34    7.84
  -1   4   6   11.39    6.94
   1   4   6   19.83    7.50
  -1  -4  -6   15.97    7.35
  -1   4   5  325.03   69.02
   1  -4  -5  255.44   68.86
  -1   4   5  177.69   68.72
   1  -4  -5  204.27   68.76
   1   4   5  373.61   69.17
   1  -4  -4    6.16    4.77
  -1   4   4    7.71    5.38
   1  -4  -4   10.03    5.10
   1   4   4   -0.91    5.09
  -1  -4  -4   -0.57    5.17
  -1   4   3  389.18  100.81
   1   4   3  367.03  100.75
  -1  -4  -3  381.27  100.80
   1  -4  -3  331.53  100.71
   1   4   3  449.79  100.78
   1   4   3  433.78  100.84
   1   4   2  187.83   41.13
  -1   4   2  153.70   41.17
  -1  -4  -2  177.07   41.21
  -1  -4  -2  132.34   41.01
   1   4   2  182.24   41.24
   1  -4  -2  130.81   41.12
   1   4   2  151.01   41.12
  -1  -4  -2  142.78   41.17
  -1  -4  -1   17.48    6.02
  -1  -4  -1   11.42    6.26
   1  -4  -1   11.50    6.26
   1   4   1   18.62    6.04
  -1   4   1   22.83    6.27
  -1   4   1   15.29    6.07
   1   4   1   12.63    6.09
  -1  -4  -1   14.76    5.95
   1   4   1   14.37    5.98
   1  -4   0  215.30   56.67
   1  -4   0   78.97   56.45
   1  -4   0  202.22   56.25
  -1   4   0  223.68   56.62
   1   4   0  239.77   56.55
  -1  -4   0  214.77   56.63
   1   4   0  260.31   56.68
  -1   4   0  263.55   56.76
  -1  -4   0  282.28   56.62
  -1  -4   0  220.32   56.59
   1   4   0  266.94   56.65
   1  -4   1  474.20  133.91
   1  -4   1  514.15  133.69
   1   4  -1  517.96  133.77
  -1   4  -1  662.06  134.01
  -1  -4   1  489.85  133.89
   1   4  -1  588.93  133.95
  -1  -4   1  605.43  133.83
   1   4  -1  479.54  133.88
  -1   4  -1  306.77  133.75
  -1   4  -1  652.11  134.05
  -1  -4   1  460.75  133.86
  -1   4  -2   79.08   16.00
   1   4  -2   60.63   15.33
   1  -4   2   60.58   15.47
  -1   4  -2   74.35   15.74
   1   4  -2   71.68   15.80
  -1  -4   2   51.65   15.72
  -1  -4   2   53.80   15.73
  -1  -4   2   55.64   15.28
   1  -4   2   43.51   15.76
  -1   4  -2   26.85   15.43
   1   4  -2   53.33   15.69
   1  -4   3  730.14  179.26
  -1  -4   3  601.07  179.16
  -1   4  -3  921.59  179.23
   1   4  -3  686.99  178.92
   1   4  -3  608.51  179.17
   1   4  -3  886.96  179.32
  -1   4  -3  794.70  179.36
  -1  -4   3  601.32  178.90
  -1  -4   3  653.88  179.19
   1  -4   4   16.17    4.87
  -1   4  -4   13.37    4.76
  -1  -4   4    5.32    5.34
  -1  -4   4   10.37    5.34
   1  -4   4   14.46    5.94
  -1  -4   4    4.79    3.05
   1   4  -4   15.81    5.54
   1   4  -4    5.81    3.12
   1   4  -4   13.14    5.76
  -1  -4   5  975.29  329.91
   1   4  -5 1044.32  329.96
   1  -4   5 1287.95  329.83
   1  -4   5 1228.66  330.04
  -1  -4   5 1206.17  329.99
   1   4  -5 1560.64  330.13
  -1   4  -5 1600.80  329.92
  -1  -4   6    2.53    5.70
  -1  -4   6   -2.97    5.63
   1  -4   6   -4.35    5.97
  -1   4  -6    3.77    4.34
   1   4  -6   13.70    6.02
   1  -4   6   -1.49    4.30
   1  -4   7 1327.29  348.66
   1  -4   7 1208.48  348.95
  -1  -4   7 1203.59  348.89
  -1  -4   7 1049.84  348.84
   1   4  -7 1581.72  349.07
  -1   4  -7 1583.73  348.74
   1   4  -8   39.85   12.25
  -1  -4   8   25.58   11.89
  -1   4  -8   40.83   11.05
   1  -4   8   42.84   10.87
  -1  -4   8   29.05   11.64
   1  -4   8   29.90   12.10
  -1   4  -9  520.28  120.01
   1  -4   9  439.94  119.91
  -1  -4   9  386.23  120.27
   1   4  -9  487.96  120.48
   1  -4  10   30.15   11.21
  -1   4 -10   39.41   11.49
   1   4 -10   55.67   13.21
  -1  -4  10   24.14   12.45
  -1   4 -11  130.42   34.34
   1  -4  11  127.14   34.23
   1   4 -11  142.20   35.48
   1   4 -12    4.88    9.20
  -1   4 -12    8.13    6.22
   1  -4  12    6.64    5.83
   1  -4  13   -0.58    5.77
  -1   4 -13   -3.95    6.23
  -1   4 -14    5.33   11.04
   1   4 -14   20.65   10.54
   1  -4  14   16.03    6.70
  -1   4 -14   -1.59    6.64
  -1   4 -15   85.75   25.39
   1   4 -15  101.78   25.18
  -1   4 -15   72.32   22.20
   1   4 -16   10.66   12.91
  -1   4 -16   11.35   13.08
   1   4 -17  145.42   43.78
  -1   4 -17  173.16   44.20
  -1   4 -18   10.89   15.15
   1   4 -18   29.87   14.90
   1   4 -19  136.90   39.41
  -1   4 -19  138.62   39.85
   1   4 -20   -2.10   15.63
  -1   4 -20    5.56   16.12
  -2  -4 -20   40.11   19.86
  -2   4  20   64.35   22.05
   2   4  20   65.74   23.42
  -2   4  19   29.36   15.76
   2  -4 -19    2.02   10.89
   2   4  19   43.14   17.81
  -2  -4 -19   15.99   13.48
   2   4  18  220.11   45.70
  -2   4  18  223.56   45.38
  -2  -4 -18  196.88   44.18
   2  -4 -17    7.56    9.53
  -2  -4 -17   10.11   11.64
   2   4  17   17.71   14.38
  -2   4  17    3.34   13.69
  -2   4  16  227.21   50.71
   2   4  16  286.72   51.55
  -2  -4 -16  229.45   50.25
   2  -4 -15   -8.17    8.05
  -2  -4 -15   16.37   10.53
   2   4  15   11.44   12.49
  -2   4  15    5.82   11.71
   2   4  14  207.27   35.83
  -2   4  14  159.57   35.04
  -2  -4 -14  145.25   34.59
   2  -4 -14   41.44   33.08
  -2   4  14  100.65   33.18
  -2   4  13   20.74    9.31
  -2   4  13   25.19   10.76
  -2  -4 -13   31.62   11.97
   2   4  13   31.18   13.36
  -2   4  13   41.97   12.81
   2  -4 -13    5.36    9.92
  -2  -4 -12   34.88   11.63
  -2   4  12   20.80   10.44
  -2   4  12   50.30   12.62
   2   4  12   30.87   12.46
   2  -4 -12    5.64    9.74
  -2   4  12   21.45    9.33
  -2   4  11   32.71   10.54
  -2  -4 -11   30.12   11.06
  -2   4  11   17.08    8.41
   2   4  11   51.58   12.22
  -2   4  11   28.18   10.85
  -2   4  11   18.54    9.41
   2  -4 -11   -1.96    8.91
   2   4  10   -1.53    8.20
   2  -4 -10   -3.27    6.47
  -2   4  10    7.64    7.50
  -2   4  10    7.99    5.12
   2   4  10    1.67    8.24
  -2  -4 -10   16.95    8.42
  -2   4  10   11.20    7.99
   2   4  10   -3.00    7.73
  -2   4  10    1.30    6.66
  -2  -4  -9   41.68   10.44
  -2   4   9   17.84    7.93
   2  -4  -9    4.45    8.38
   2   4   9   37.36   10.47
  -2   4   9   21.35    9.93
   2   4   9   33.54   10.20
   2   4   9   33.35   10.16
  -2   4   9   22.28    9.08
  -2   4   9   21.46    9.53
  -2  -4  -8   33.80   10.20
  -2   4   8   24.68    9.75
  -2   4   8   12.86    7.78
   2   4   8   41.82   10.18
   2  -4  -8    4.24    8.78
   2   4   8   38.84   10.04
  -2   4   8   16.95    9.06
   2   4   8   36.90   10.51
  -2   4   8   50.20    9.85
  -2   4   7  107.12   36.46
   2   4   7  186.38   37.54
  -2  -4  -7  167.48   37.42
   2   4   7  206.39   37.56
  -2   4   7  120.49   36.99
   2  -4  -7   55.31   36.77
  -2   4   7  171.58   37.17
   2   4   7  165.04   37.37
  -2   4   7  168.60   37.28
  -2   4   6  162.31   47.64
   2   4   6  309.48   48.68
   2   4   6  284.86   48.74
   2  -4  -6   79.71   47.95
  -2   4   6  227.27   48.36
  -2   4   6  137.89   48.11
  -2   4   5  125.82   25.74
   2   4   5  144.30   25.95
   2   4   5  149.91   26.10
   2  -4  -5   36.42   25.25
   2  -4  -5  116.38   25.64
  -2   4   5  101.04   25.62
  -2   4   5   78.93   24.83
  -2   4   4  452.32  115.83
  -2  -4  -4  604.99  115.98
   2   4   4  727.32  116.13
  -2   4   4  608.88  115.92
   2  -4  -4  513.48  115.80
   2   4   4  771.06  116.25
  -2   4   4  358.95  115.28
   2  -4  -4  149.44  115.56
   2   4   4  645.63  116.09
   2   4   3   53.60   13.73
   2  -4  -3   43.01   13.20
   2   4   3   51.79   13.42
   2   4   3   49.23   13.49
  -2   4   3   41.17   13.19
  -2  -4  -3   49.49   13.34
  -2  -4  -3   44.64   13.65
  -2  -4  -2 1236.08  272.19
  -2  -4  -2  984.70  272.00
   2  -4  -2  831.40  271.94
   2   4   2 1191.06  272.10
   2   4   2 1235.74  272.22
  -2   4   2  950.56  271.99
   2   4   2 1170.61  272.15
  -2  -4  -1  395.03   74.41
   2  -4  -1  213.62   73.76
  -2  -4  -1  316.93   74.21
   2  -4  -1  236.20   74.13
   2   4   1  392.76   74.32
  -2   4   1  300.23   74.19
   2   4   1  387.12   74.35
  -2  -4  -1  311.37   74.33
   2   4   1  433.87   74.56
   2  -4   0  930.92  287.35
  -2  -4   0 1487.99  287.54
  -2   4   0 1447.44  287.70
   2   4   0 1169.70  287.40
  -2   4   0  290.68  287.17
  -2   4   0 1205.57  287.46
  -2  -4   0 1107.57  287.38
   2   4   0 1356.22  287.48
  -2  -4   0 1074.39  287.49
   2   4   0 1362.21  287.62
   2  -4   1   23.34    9.14
   2   4  -1   34.31    9.50
   2  -4   1   23.55    9.25
  -2  -4   1   18.33    8.82
  -2   4  -1   39.65    9.65
   2   4  -1   32.53    9.06
  -2   4  -1   30.19    9.14
   2   4  -1   27.49    8.94
  -2  -4   1   39.11    9.11
  -2  -4   1   25.66    9.33
  -2  -4   2  336.70  104.53
  -2  -4   2  452.12  104.37
   2  -4   2  346.75  104.48
   2  -4   2  418.07  104.59
  -2   4  -2  476.15  104.68
  -2  -4   2  299.53  104.37
   2   4  -2  408.64  104.44
  -2   4  -2  459.01  104.64
   2   4  -2  418.86  104.34
   2  -4   3    6.10    4.95
  -2  -4   3   -0.48    4.42
  -2  -4   3    7.20    5.21
  -2   4  -3    0.31    5.08
   2  -4   3   -5.78    5.06
   2   4  -3    3.99    4.54
  -2   4  -3    4.28    4.88
  -2  -4   3    3.74    3.51
   2   4  -3    4.69    3.47
  -2  -4   4   51.02   18.32
  -2  -4   4   63.19   17.46
  -2   4  -4   83.51   18.35
  -2  -4   4   60.61   18.05
   2  -4   4   61.11   18.12
   2   4  -4   77.74   18.15
   2   4  -4   63.38   17.43
  -2   4  -4   76.23   18.30
   2  -4   4   62.00   18.27
  -2  -4   5   25.52    7.18
   2  -4   5   32.61    8.83
  -2  -4   5   25.58    8.63
   2  -4   5   29.83    9.17
  -2   4  -5   32.59    8.93
   2   4  -5   30.27    8.83
  -2   4  -5   27.39    9.34
   2   4  -5   24.36    7.15
   2  -4   6   10.73    5.41
  -2  -4   6    3.45    5.19
   2  -4   6   14.82    6.26
  -2   4  -6    2.92    5.45
   2   4  -6    1.66    5.48
  -2   4  -6   -1.22    6.26
   2  -4   7   35.67   11.09
  -2  -4   7   27.65   11.34
  -2   4  -7   37.13   11.22
   2  -4   7   38.98   11.58
   2   4  -7   39.78   11.55
  -2   4  -7   37.18   11.97
  -2   4  -8  131.26   28.27
   2   4  -8  110.38   28.39
  -2   4  -8  106.95   28.77
  -2  -4   8   82.48   28.20
   2  -4   8   69.11   28.41
   2  -4   8  103.47   28.08
   2   4  -9  112.77   38.21
   2  -4   9  147.85   37.80
  -2  -4   9  116.22   37.94
   2  -4   9  122.99   38.21
  -2   4  -9  162.13   38.00
   2   4  -9  160.26   38.21
  -2   4  -9  162.18   38.50
   2  -4  10  802.40  215.07
   2   4 -10  909.41  215.43
  -2   4 -10  922.47  215.66
  -2   4 -10  864.19  215.18
  -2  -4  10  667.53  215.18
  -2   4 -11   15.77   10.38
  -2   4 -11   17.49    8.19
  -2  -4  11    8.40    9.00
   2  -4  11   13.14    8.00
   2   4 -11   14.00    9.54
   2  -4  12  451.67  129.36
  -2   4 -12  583.66  130.34
   2   4 -12  540.03  129.95
  -2   4 -12  477.17  129.46
  -2   4 -13   33.00   13.11
   2   4 -13   13.97   11.65
  -2   4 -13   29.40   10.05
   2  -4  13   12.21    9.57
  -2   4 -14  311.85   83.25
   2  -4  14  292.30   83.09
  -2   4 -14  387.16   84.51
   2   4 -14  317.45   83.91
  -2   4 -15   58.97   19.01
  -2   4 -15   50.02   15.57
   2   4 -15   44.27   17.74
  -2   4 -16  208.63   51.63
   2   4 -16  212.17   51.18
  -2   4 -16  167.35   49.55
   2   4 -17   48.25   18.12
   2   4 -18   41.52   18.34
   2   4 -19    7.68   14.07
  -3   4  19    8.24   14.14
   3   4  19    2.15   15.52
  -3  -4 -19    7.34   12.81
  -3   4  18   -8.61   13.27
  -3  -4 -18    8.85   12.94
   3   4  18  -24.36   15.26
   3  -4 -18   -5.22   10.03
   3   4  17   -5.73   14.38
  -3   4  17    8.87   12.66
  -3  -4 -17   -6.81   12.08
   3  -4 -17   -2.54    9.42
  -3  -4 -16   25.35   13.51
   3   4  16   28.70   15.42
   3  -4 -16   15.42   11.24
  -3   4  16   29.38   13.76
   3  -4 -15    2.39    9.25
   3   4  15   13.43   12.81
  -3   4  15    1.40   11.55
  -3  -4 -15   26.66   11.91
  -3   4  14   37.15   11.73
   3   4  14   17.24   12.81
  -3   4  14   11.32    7.78
  -3  -4 -14   -0.75   11.31
   3  -4 -14   -0.58    8.67
  -3   4  13   62.44   22.36
   3   4  13  130.59   25.21
  -3   4  13  119.99   24.40
  -3  -4 -13  100.23   24.41
  -3   4  12   82.48   27.66
   3   4  12  165.21   29.94
  -3  -4 -12  174.65   29.90
  -3   4  12  117.88   29.13
   3  -4 -11   62.53   84.93
  -3   4  11  429.41   85.81
  -3   4  11  219.90   85.09
   3   4  11  492.84   86.35
  -3   4  11  280.60   84.92
  -3  -4 -11  469.68   86.28
  -3   4  11  459.40   85.68
  -3   4  10  273.77   83.23
  -3  -4 -10  483.49   84.60
   3   4  10  513.30   84.61
  -3   4  10  238.04   83.47
  -3   4  10  440.69   83.89
  -3   4  10  396.69   83.98
  -3  -4  -9  417.13   89.70
   3   4   9  438.92   89.65
  -3   4   9  207.73   88.85
  -3   4   9  335.31   89.15
   3   4   9  434.26   89.55
  -3   4   9  386.91   89.14
  -3   4   9  254.84   88.64
  -3   4   8  345.17   82.69
  -3   4   8  300.53   82.69
  -3  -4  -8  398.17   83.31
   3   4   8  413.73   83.07
  -3   4   8  177.16   82.42
   3   4   8  392.17   83.12
  -3   4   8  239.56   82.21
   3   4   8  385.80   83.20
  -3   4   7  505.07  111.18
  -3   4   7  443.77  111.19
  -3   4   7  371.82  110.76
   3   4   7  530.44  111.50
  -3   4   7  382.30  111.26
   3   4   7  563.23  111.46
  -3   4   7  309.45  111.04
  -3   4   6  115.36   33.27
  -3   4   6  108.53   33.43
  -3   4   6  122.02   33.20
   3   4   6  164.00   33.47
  -3   4   6  133.33   33.10
  -3   4   6  104.61   32.62
   3   4   6  163.27   33.61
  -3   4   5  101.68   44.15
  -3   4   5  180.24   44.53
  -3   4   5  147.04   44.13
   3   4   5  217.66   44.42
   3  -4  -5  153.31   44.06
   3  -4  -5  156.08   43.71
  -3   4   5  157.01   43.71
   3   4   5  212.95   44.45
   3   4   5  210.80   44.68
   3   4   5  225.08   44.85
   3   4   4  150.47   27.97
   3  -4  -4   96.85   27.58
  -3  -4  -4  141.23   28.42
   3   4   4  133.07   27.95
  -3   4   4   53.38   27.72
  -3   4   4  108.10   28.06
  -3   4   4   89.42   27.62
   3   4   4  108.71   28.30
  -3   4   4   93.56   27.13
   3   4   4  140.27   28.26
   3  -4  -4   94.12   27.11
  -3   4   3   59.57   20.16
  -3   4   3   31.35   20.34
  -3  -4  -3   90.81   20.75
  -3   4   3   88.72   20.92
   3  -4  -3   73.70   20.18
   3   4   3  106.04   20.60
   3   4   3  111.16   20.90
   3   4   3  102.01   20.98
   3  -4  -3   56.19   19.62
   3   4   2   16.05    7.31
   3  -4  -2    9.06    4.33
   3  -4  -2    9.86    5.58
  -3  -4  -2   21.05    5.81
   3   4   2    9.45    5.61
  -3   4   2    7.60    5.25
  -3  -4  -2   15.97    6.76
   3   4   2   18.79    6.69
  -3  -4  -1   -2.59    6.27
   3  -4  -1    4.70    4.27
   3   4   1   -3.13    4.39
  -3  -4  -1   -3.43    5.63
  -3   4   1   -1.72    4.44
   3  -4  -1    2.65    3.42
   3   4   1   -3.23    5.52
  -3  -4  -1    1.15    4.44
   3   4   0   88.25   22.27
  -3  -4   0   73.07   22.25
  -3   4   0   87.03   22.34
  -3  -4   0   77.31   22.86
   3  -4   0   54.58   22.22
  -3  -4   0  107.25   22.80
   3   4   0  102.92   22.67
  -3  -4   1   80.33   18.15
  -3  -4   1   47.25   18.30
   3  -4   1   78.03   18.55
   3   4  -1   60.56   17.66
  -3   4  -1   69.84   17.93
   3  -4   1   46.28   17.79
   3   4  -1   71.95   17.93
  -3  -4   1   51.27   17.63
  -3   4  -1   92.06   18.76
  -3  -4   2  236.50   50.00
   3  -4   2  206.28   50.30
  -3  -4   2  146.18   49.74
  -3   4  -2  230.52   50.39
   3   4  -2  169.57   49.78
  -3   4  -2  212.37   50.08
   3   4  -2  202.72   49.91
   3  -4   2  153.74   49.90
   3  -4   3  425.45  100.51
  -3   4  -3  480.36  100.65
   3  -4   3  339.15  100.25
   3   4  -3  359.69  100.10
   3   4  -3  416.21  100.13
  -3   4  -3  470.50  100.44
  -3  -4   3  250.81  100.00
  -3  -4   3  436.24  100.18
   3  -4   4  454.06  105.72
  -3  -4   4  263.56  105.21
   3  -4   4  349.48  105.46
  -3  -4   4  464.15  105.29
   3   4  -4  417.90  105.37
  -3   4  -4  460.07  105.66
   3   4  -4  411.17  105.23
  -3   4  -4  480.61  105.83
   3  -4   5  703.86  179.99
   3   4  -5  717.58  179.54
  -3  -4   5  506.70  179.63
  -3   4  -5  847.64  180.18
   3  -4   5  630.47  179.88
   3   4  -5  674.22  179.75
  -3   4  -5  802.09  180.07
  -3  -4   5  740.19  179.56
   3   4  -6  258.13   89.86
  -3  -4   6  291.95   89.59
  -3  -4   6  346.23   89.28
   3  -4   6  318.67   89.85
   3   4  -6  378.65   89.71
  -3   4  -6  442.63   90.18
  -3   4  -6  429.19   90.13
   3  -4   6  374.52   89.95
   3   4  -6  341.04   89.26
   3  -4   7  228.80   48.94
   3   4  -7  189.15   49.03
  -3  -4   7  191.19   48.54
   3  -4   7  202.51   48.92
  -3   4  -7  262.29   49.16
  -3  -4   7  176.29   47.82
   3   4  -7  228.25   48.67
  -3   4  -7  257.02   49.24
   3   4  -7  163.39   47.81
  -3  -4   7  150.30   48.79
   3   4  -8  172.95   53.99
   3  -4   8  219.63   53.78
   3  -4   8  190.48   53.82
  -3   4  -8  220.91   53.86
  -3  -4   8  165.79   53.44
   3   4  -8  221.56   53.64
  -3   4  -8  239.44   54.17
   3   4  -9  167.31   50.99
   3  -4   9  204.64   50.82
  -3  -4   9  136.88   50.46
  -3   4  -9  231.28   51.04
   3   4  -9  182.70   50.64
  -3   4  -9  234.60   51.30
   3   4 -10   39.11   14.00
  -3   4 -10   46.11   13.61
   3   4 -10   46.22   13.27
   3  -4  10   27.40   12.94
  -3  -4  10   21.67   12.71
  -3   4 -10   47.78   14.60
  -3   4 -11  128.82   27.85
   3   4 -11   83.28   27.42
   3   4 -11   84.95   26.66
   3  -4  11   78.87   26.49
  -3  -4  11   67.57   26.45
  -3   4 -11  117.35   26.84
  -3   4 -12   52.88   15.05
  -3   4 -12   32.15   13.35
   3   4 -12   30.15   13.64
   3  -4  12   34.50   12.82
  -3   4 -13   13.64   12.07
  -3   4 -13   10.71    9.37
   3   4 -13   15.16   10.38
   3   4 -14   23.62   11.42
  -3   4 -14   10.50    9.82
  -3   4 -14   15.42   12.45
  -3   4 -15   45.13   15.07
   3   4 -15    9.91   12.29
  -3   4 -15   17.08   10.82
  -3   4 -16   19.44   14.68
   3   4 -16    9.88   12.38
  -3   4 -16   21.67   10.85
  -3   4 -17   56.11   21.11
  -3   4 -17   55.27   18.00
   3   4 -17   50.40   19.44
  -3   4 -18   55.36   19.14
   3   4 -18   24.30   17.29
   3   4 -19  145.89   37.83
  -3   4 -19  114.98   38.49
  -4  -4 -18   86.42   26.92
  -4   4  18   83.18   26.55
  -4  -4 -17  115.31   28.86
   4   4  17  104.59   28.85
  -4   4  17  106.50   27.82
  -4   4  17   53.13   26.11
  -4  -4 -16   60.49   20.89
   4   4  16   69.81   21.95
  -4   4  16   74.92   20.49
  -4   4  16   40.52   18.62
  -4   4  15  150.79   34.77
   4   4  15  125.71   35.73
  -4   4  15   74.89   33.70
  -4  -4 -15  160.70   35.87
   4   4  14   98.13   24.78
  -4   4  14   43.66   22.59
  -4   4  14  100.04   23.53
  -4  -4 -14   80.91   24.30
  -4   4  13   67.84   32.87
   4   4  13  161.20   34.52
  -4   4  13  129.73   33.35
  -4  -4 -13  146.41   34.49
  -4   4  12   71.92   32.30
  -4  -4 -12  160.07   34.52
   4   4  12  153.24   34.22
  -4   4  12   82.02   32.99
  -4   4  12  146.83   33.50
  -4   4  11    2.24    7.20
   4   4  11   18.69   10.95
  -4   4  11   12.59    9.54
  -4   4  11   13.15    9.44
  -4  -4 -11    5.86   11.33
  -4   4  11   16.64    8.55
  -4   4  10   17.74    8.15
   4   4  10   15.45   10.73
  -4   4  10    8.38    8.96
  -4   4  10   14.98    7.05
  -4  -4 -10    5.59   10.77
  -4   4  10    5.75    8.82
  -4   4   9   -4.02    7.66
  -4   4   9    4.95    5.75
  -4   4   9   -4.90    7.00
   4   4   9   -1.64    8.52
   4   4   9    3.00    8.24
  -4  -4  -9   10.00    9.63
  -4   4   9   11.02    7.35
  -4   4   9   -2.73    8.32
   4   4   8   47.87   13.96
  -4   4   8   29.21   12.95
   4   4   8   70.32   14.86
  -4   4   8   51.08   13.65
  -4   4   8   41.12   13.91
  -4   4   8   25.50   13.49
  -4   4   8   32.02   12.48
  -4   4   7   26.94   11.72
   4   4   7   45.05   11.88
   4  -4  -7   37.45   10.60
  -4   4   7   37.26   11.00
  -4   4   7   26.46   11.31
  -4   4   7   33.00   12.40
   4   4   7   41.27   12.25
  -4   4   7   30.71   10.45
   4   4   7   37.44   13.04
   4  -4  -6  104.30   26.84
  -4   4   6  103.47   27.91
  -4   4   6  103.46   27.06
   4   4   6  143.97   27.98
  -4   4   6   81.00   26.75
   4   4   6  123.41   28.53
  -4   4   6   54.40   27.38
   4   4   6  132.98   27.63
  -4   4   6   84.41   27.04
   4  -4  -5  437.64  127.41
  -4   4   5  172.98  127.48
   4   4   5  576.89  127.88
  -4  -4  -5  715.37  128.53
   4   4   5  680.33  128.35
  -4   4   5  411.24  127.53
  -4   4   5  553.92  128.17
   4   4   5  653.48  127.91
  -4   4   5  451.81  127.42
   4   4   4  367.33   71.26
   4  -4  -4  236.44   70.80
  -4  -4  -4  374.31   71.86
  -4   4   4  322.34   71.72
   4  -4  -4  245.79   70.91
   4   4   4  328.92   71.27
  -4   4   4   72.86   70.95
  -4   4   4  218.30   70.86
   4   4   4  378.91   71.79
   4  -4  -3  572.82  168.94
  -4   4   3  800.93  169.70
  -4  -4  -3 1005.49  169.89
  -4   4   3  116.64  168.81
  -4   4   3  519.88  168.91
   4   4   3  885.75  169.65
   4  -4  -3  608.73  168.92
   4   4   3  849.04  169.21
   4   4   3  744.03  169.17
  -4  -4  -2  495.78   89.51
   4  -4  -2  266.81   88.59
   4   4   2  371.08   88.78
  -4   4   2  393.42   89.38
  -4   4   2  278.41   88.58
   4   4   2  403.82   89.21
   4   4   2  413.81   88.79
   4  -4  -2  300.70   88.60
  -4  -4  -1  272.63   73.60
   4  -4  -1  318.24   74.26
   4  -4  -1  201.34   73.51
   4   4   1  267.16   73.61
  -4   4   1  308.52   73.67
   4   4   1  376.53   74.23
  -4  -4  -1  404.15   74.36
   4  -4  -1  263.03   73.61
  -4  -4   0  368.87   70.14
  -4  -4   0  259.95   69.41
   4  -4   0  193.06   69.41
   4   4   0  239.45   69.41
  -4   4   0  305.61   69.57
   4   4   0  346.22   69.99
   4  -4   0  251.27   69.55
   4  -4   1  132.17   50.39
   4   4  -1  173.58   50.32
  -4  -4   1  164.92   50.31
   4   4  -1  244.46   50.88
  -4   4  -1  213.47   50.60
  -4  -4   1  279.51   51.03
  -4  -4   2   50.10   15.82
  -4  -4   2   63.75   16.78
   4  -4   2   79.17   17.31
  -4   4  -2   66.08   16.40
   4  -4   2   46.12   16.18
   4   4  -2   51.20   17.37
   4   4  -2   49.89   15.86
  -4   4  -2   81.64   17.76
   4   4  -2   64.00   16.51
   4   4  -3   46.68   19.13
   4   4  -3   80.45   18.68
  -4  -4   3   36.46   17.93
   4   4  -3   68.66   18.11
   4  -4   3   62.78   18.53
  -4  -4   3   84.34   18.74
   4  -4   3   88.61   19.47
  -4   4  -3   91.44   19.69
  -4   4  -3   70.41   18.68
  -4  -4   4   31.05    9.08
  -4  -4   4   15.66    9.88
   4   4  -4   24.60   10.16
   4   4  -4   26.67    8.66
   4  -4   4   31.44   10.19
  -4  -4   4   11.83    7.98
   4  -4   4   19.64    9.10
  -4   4  -4   28.04   10.40
   4   4  -4   32.36    8.38
  -4   4  -4   27.86    9.54
   4   4  -5    4.44    7.43
  -4  -4   5    3.13    4.80
  -4  -4   5   -3.00    5.52
   4  -4   5   -7.77    7.82
   4   4  -5    3.38    5.09
   4  -4   5    1.51    6.39
  -4   4  -5    2.42    6.76
  -4  -4   5   -6.07    7.61
  -4   4  -5    6.35    8.11
   4   4  -5    3.27    5.25
   4   4  -6    4.05    7.86
   4   4  -6    4.71    4.95
   4  -4   6   11.89    7.48
  -4  -4   6    2.95    5.17
   4  -4   6    6.61    6.91
  -4   4  -6    3.25    7.96
   4   4  -6    2.25    5.34
  -4  -4   6    1.72    5.27
  -4   4  -6    4.89    7.63
   4   4  -7   -1.21    8.13
  -4  -4   7   -1.73    4.97
   4   4  -7   -0.21    4.51
   4   4  -7    5.04    6.06
   4  -4   7    7.60    7.77
  -4  -4   7    9.87    5.80
   4  -4   7    3.60    7.40
  -4   4  -7    8.32    8.77
  -4   4  -7    7.79    7.89
  -4   4  -8   67.12   19.22
   4   4  -8   46.34   18.79
  -4   4  -8   81.83   19.22
  -4  -4   8   50.26   17.86
   4  -4   8   66.92   18.88
  -4  -4   8   67.98   17.13
   4   4  -8   59.55   18.00
  -4   4  -9   20.81   10.53
  -4  -4   9   19.15    5.68
  -4   4  -9   29.80   10.81
  -4  -4   9   18.07    8.27
   4   4  -9   13.73    8.63
   4   4  -9   10.68    9.65
  -4  -4   9   11.51    5.34
   4   4 -10  111.11   23.22
  -4  -4  10  123.51   21.73
  -4  -4  10   67.13   19.53
  -4  -4  10   54.34   19.48
  -4   4 -10  171.19   23.45
  -4   4 -10  189.15   23.80
   4   4 -10  141.19   22.01
   4   4 -11  193.51   71.21
  -4  -4  11  214.63   70.53
  -4   4 -11  323.86   71.44
  -4   4 -11  337.44   71.64
   4   4 -11  269.95   70.72
   4   4 -12  103.91   39.32
  -4   4 -12  163.37   39.26
  -4   4 -12  161.60   39.84
   4   4 -12  143.68   38.81
   4   4 -13  129.40   47.52
  -4   4 -13  194.57   47.79
  -4   4 -13  183.76   47.29
   4   4 -13  188.01   46.90
  -4   4 -14  130.39   38.54
  -4   4 -14  157.24   39.78
   4   4 -14  142.59   38.40
  -4   4 -15   81.24   21.62
   4   4 -15   63.65   19.60
  -4   4 -15   38.63   19.21
  -4   4 -16  121.62   29.12
   4   4 -16   83.60   27.39
  -4   4 -16   81.41   27.26
  -4   4 -17   30.27   17.13
   4   4 -17   30.15   15.85
  -4   4 -17   36.22   14.93
  -4   4 -18   10.70   16.28
   4   4 -18    8.26   13.94
  -5   4  17   -5.08   12.77
  -5  -4 -17  -25.84   16.24
   5   4  17  -18.92   16.34
  -5   4  16   52.08   15.83
   5   4  16   45.92   17.64
  -5   4  16   19.17   14.73
  -5  -4 -16   38.98   17.74
   5   4  15   25.50   15.20
  -5   4  15   23.23   13.38
  -5   4  15   21.64   13.16
  -5  -4 -15   44.37   15.91
  -5   4  14   34.24   16.23
   5   4  14   55.07   18.23
  -5   4  14   26.02   16.05
  -5  -4 -14   79.02   18.96
   5   4  13   49.07   15.53
  -5   4  13   19.06   13.43
  -5   4  13   22.45   12.77
  -5  -4 -13   36.69   15.56
  -5  -4 -12  198.07   43.08
   5   4  12  190.30   42.44
  -5   4  12  138.65   41.20
  -5   4  12  115.28   41.45
   5   4  11   62.70   17.35
  -5   4  11   39.32   15.35
  -5  -4 -11   72.80   18.40
  -5   4  11   29.35   16.15
  -5   4  10  228.30   75.78
   5   4  10  362.67   76.85
  -5   4  10  237.82   76.40
  -5  -4 -10  411.45   77.62
  -5   4  10  287.62   75.93
  -5   4  10  270.34   76.01
  -5   4   9   55.17   16.21
   5  -4  -9   43.33   16.23
   5   4   9   65.88   17.91
  -5   4   9   61.27   16.42
  -5   4   9   40.36   17.83
  -5   4   9   49.49   16.08
   5   4   9   82.51   19.75
   5   4   8  280.00   57.60
   5  -4  -8  209.91   56.81
  -5   4   8  179.61   56.70
  -5   4   8  190.40   56.66
  -5   4   8  209.09   57.49
   5   4   8  318.29   57.62
  -5   4   8  218.60   56.68
  -5   4   7   25.85   10.42
   5   4   7   41.76   11.67
  -5   4   7   36.38   10.26
   5  -4  -7   24.92   10.45
  -5   4   7   32.47   10.31
   5   4   7   34.72   11.95
  -5   4   7   25.49   12.17
   5  -4  -6  112.75   33.12
   5   4   6  172.41   33.95
  -5   4   6  138.39   34.48
  -5   4   6   86.49   32.93
  -5  -4  -6  172.98   35.11
  -5   4   6  118.10   33.22
  -5   4   6  109.64   32.99
   5   4   6  157.42   33.70
   5   4   5   54.20   14.98
  -5   4   5   45.69   14.22
   5   4   5   64.30   15.19
  -5  -4  -5   60.61   16.91
   5  -4  -5   45.41   14.52
  -5   4   5   36.22   14.03
  -5   4   5   62.20   16.53
   5  -4  -4   27.59    9.31
   5   4   4   28.22    9.86
   5   4   4   42.47    9.64
  -5  -4  -4   28.63   11.99
  -5   4   4   26.21   11.59
  -5   4   4   17.96    8.57
   5   4   3   35.42    9.74
   5  -4  -3   27.00    9.27
  -5  -4  -3   50.54   12.48
  -5   4   3   36.87   12.24
  -5   4   3   16.45    9.03
   5  -4  -3   32.26    9.80
   5   4   3   25.17    9.88
   5  -4  -2    6.77    6.05
   5   4   2   -3.19    5.28
  -5  -4  -2    7.74    8.31
   5   4   2    1.52    8.00
   5   4   2    2.56    5.36
   5  -4  -2    4.52    5.12
  -5   4   2   10.12    8.79
  -5   4   2   -2.01    4.98
   5   4   1   79.71   18.84
   5  -4  -1   54.64   17.13
  -5  -4  -1   72.11   18.61
   5  -4  -1   42.16   16.59
  -5   4   1   64.61   16.70
   5   4   1   47.02   16.56
   5   4   1   69.89   16.75
  -5   4   1   72.91   18.72
   5   4   1   83.11   18.25
   5   4   0  121.01   29.91
   5  -4   0   80.88   29.94
   5   4   0   89.45   29.79
   5   4   0  138.76   31.07
  -5   4   0  121.44   30.08
   5   4   0  127.46   31.48
  -5  -4   0  183.51   31.62
   5  -4   0  112.86   30.50
   5   4  -1   93.36   23.52
   5   4  -1  123.77   23.06
   5   4  -1   62.21   21.49
   5  -4   1   56.30   21.83
  -5   4  -1   93.06   22.14
  -5  -4   1  112.83   23.24
   5  -4   1   85.47   22.62
   5   4  -2  364.13   66.93
   5  -4   2  223.28   66.27
  -5  -4   2  196.10   65.92
   5   4  -2  228.27   65.95
  -5   4  -2  320.58   66.52
   5   4  -2  269.15   67.26
  -5  -4   2  374.14   67.05
   5  -4   2  260.24   66.74
   5   4  -3   90.17   18.93
  -5  -4   3   99.52   19.16
   5   4  -3   51.19   19.54
  -5  -4   3   46.59   17.46
   5   4  -3   61.26   17.49
   5  -4   3   67.65   18.32
  -5   4  -3   74.74   20.15
  -5   4  -3   71.47   18.49
   5   4  -4  374.40   77.25
   5  -4   4  287.60   77.04
  -5   4  -4  361.96   78.06
   5   4  -4  240.47   77.57
   5   4  -4  264.61   76.56
  -5   4  -4  381.53   77.29
  -5  -4   4  401.68   77.39
  -5  -4   4  217.77   76.52
   5   4  -5   26.50   14.56
  -5  -4   5   30.11   11.68
  -5   4  -5   49.04   13.42
   5   4  -5   44.27   12.83
   5  -4   5   42.78   13.10
  -5   4  -5   49.63   15.02
   5   4  -5   32.17   11.83
  -5  -4   5   62.70   13.28
   5   4  -6  316.39  101.45
   5   4  -6  445.58  100.90
  -5  -4   6  253.77  100.49
   5  -4   6  379.59  101.08
  -5   4  -6  488.42  102.01
   5   4  -6  389.70  100.63
  -5   4  -6  463.25  101.34
  -5  -4   6  452.80  100.95
   5   4  -7  121.33   45.95
   5   4  -7  164.21   45.00
   5  -4   7  163.52   45.60
  -5   4  -7  229.77   46.74
  -5  -4   7  125.89   44.77
  -5   4  -7  214.82   45.94
   5   4  -7  167.21   44.93
  -5  -4   7  201.19   45.20
   5   4  -8  153.89   61.39
   5   4  -8  236.60   60.53
  -5  -4   8  179.51   60.46
  -5   4  -8  272.11   62.02
  -5   4  -8  296.48   61.66
   5   4  -8  244.76   60.67
  -5  -4   8  249.19   60.59
  -5   4  -9  118.93   25.61
   5   4  -9   87.70   23.55
   5   4  -9   56.62   24.95
  -5   4  -9   86.94   24.81
  -5  -4   9   66.78   23.22
  -5  -4   9   89.61   23.10
  -5   4 -10   49.67   15.76
  -5   4 -10   55.52   15.93
   5   4 -10   27.20   15.42
   5   4 -10   50.92   13.67
  -5  -4  10   35.70   12.14
   5   4 -11    0.43    7.74
  -5   4 -11   -7.39   11.16
   5   4 -11   18.67   11.54
  -5   4 -11    7.66   11.23
   5   4 -12   -1.43    8.92
   5   4 -12   11.88   11.44
  -5   4 -12  -13.63   11.70
  -5   4 -12   -1.50   11.95
  -5   4 -13    6.42   12.20
   5   4 -13   -6.29    9.69
   5   4 -13   15.99   12.05
  -5   4 -13   -3.11   11.35
  -5   4 -14    4.77   12.04
   5   4 -14   -5.72   10.13
  -5   4 -14   17.15   13.42
   5   4 -14    6.50   13.12
  -5   4 -15   -0.81   12.15
  -5   4 -15    0.91   13.71
  -5   4 -16   34.15   16.79
  -5   4 -16   44.73   18.72
  -5   4 -17   29.90   18.12
  -5   4 -17   36.58   16.11
  -6   4  15   41.90   22.86
   6   4  15   98.07   25.15
  -6  -4 -15   97.37   26.08
   6   4  14   16.68   13.84
  -6   4  14    3.66   11.84
  -6  -4 -14   18.64   15.04
   6   4  13   72.35   18.98
  -6   4  13   21.80   17.04
  -6  -4 -13   55.06   20.33
   6   4  12    4.34   12.05
   6   4  12  -18.43   15.62
  -6   4  12    0.72   11.04
  -6  -4 -12   -8.70   13.58
  -6   4  11   21.50   12.88
  -6  -4 -11   38.25   15.13
   6   4  11   12.71   12.93
   6  -4 -10   10.28    8.52
   6   4  10  -10.47   10.40
  -6   4  10   16.37   10.43
   6  -4  -9   29.89   10.03
   6   4   9   27.66   11.43
  -6   4   9   18.84    8.54
  -6   4   9    3.54   11.38
   6  -4  -8   14.14    7.94
   6   4   8   -9.76    9.03
  -6   4   8   -1.09    5.87
  -6   4   8    3.52   10.13
   6  -4  -7   78.85   22.04
  -6   4   7   41.69   20.95
  -6   4   7   95.40   23.70
  -6  -4  -7  123.74   24.96
   6   4   7  109.98   22.83
   6  -4  -6   42.60   12.73
   6   4   6   44.47   13.34
  -6  -4  -6   77.32   16.70
  -6   4   6   23.04   11.27
  -6   4   6   51.76   15.41
   6  -4  -5  289.89   75.53
   6   4   5  365.98   75.64
  -6   4   5  155.22   74.79
  -6  -4  -5  478.75   77.24
  -6   4   5  366.20   76.74
   6   4   5  398.86   75.63
   6   4   5  375.79   77.07
   6  -4  -4   30.95   12.39
  -6   4   4   28.81   10.66
   6   4   4   44.39   12.16
   6   4   4   44.87   15.47
   6   4   4   43.77   12.01
  -6   4   4   49.67   14.80
  -6   4   4   25.17   10.58
   6   4   3  227.41   52.39
   6   4   3  180.69   50.55
  -6   4   3  251.07   52.22
   6  -4  -3  189.02   50.97
  -6   4   3  131.98   50.09
   6   4   3  250.58   50.66
  -6  -4  -3  342.98   52.78
   6   4   2   15.18   11.58
   6  -4  -2   20.03    8.18
   6   4   2   20.13    6.56
   6  -4  -2    1.61    5.56
   6   4   2   14.16    6.41
  -6   4   2   33.80   11.40
  -6  -4  -2   21.07   11.40
  -6   4   2    5.71    5.42
   6  -4  -1  254.23   90.09
  -6   4   1  493.46   92.05
   6   4   1  269.43   90.07
  -6   4   1  349.84   90.18
   6   4   1  383.31   90.17
  -6  -4  -1  649.77   92.23
   6  -4  -1  357.89   90.80
   6   4   1  450.01   91.99
  -6  -4   0   37.51   12.67
   6   4   0   21.35   13.01
   6   4   0   29.63    8.06
   6  -4   0   16.77    8.94
   6   4   0   24.12    7.98
   6  -4   0   28.42   10.64
  -6   4   0   30.75   13.32
  -6   4   0   34.53    9.11
   6  -4   1  282.82   62.92
   6   4  -1  235.35   62.41
   6  -4   1  395.78   64.07
  -6   4  -1  438.12   63.27
   6   4  -1  372.84   65.03
  -6  -4   1  600.81   65.28
   6   4  -1  125.67   62.30
   6  -4   2   29.52    9.20
   6   4  -2   27.88   10.72
  -6  -4   2   38.22   10.41
   6  -4   2   28.83    6.81
  -6   4  -2   39.95    7.32
   6   4  -2   16.29    3.38
   6   4  -3  120.52   19.29
   6  -4   3   79.73   15.93
   6  -4   3  110.77   18.03
   6   4  -3  151.72   17.93
  -6   4  -3  128.47   16.54
  -6  -4   3  157.00   18.62
  -6   4  -4    5.64    7.38
   6   4  -4   -2.93   10.15
   6  -4   4   16.32    9.86
   6   4  -4    2.77    1.98
  -6  -4   4  -10.57    8.80
   6  -4   4    7.80    6.66
   6   4  -4   -2.33    7.69
  -6   4  -4    3.01   10.77
  -6   4  -5    6.28    7.81
   6   4  -5    9.69   10.09
  -6  -4   5   15.29    8.71
   6   4  -5   13.35    7.84
   6  -4   5   -6.29    7.65
  -6   4  -5    7.66   10.83
   6   4  -6    5.34    9.77
  -6   4  -6   -0.46    7.95
  -6  -4   6    1.36    8.03
   6  -4   6   -8.66    8.01
  -6   4  -6   -3.12   10.60
  -6   4  -7   58.85   19.01
   6   4  -7   40.73   18.44
  -6  -4   7   50.13   16.29
  -6   4  -7   64.76   17.11
  -6   4  -8   17.29   11.14
  -6   4  -8   36.53   13.48
   6   4  -8   13.71   12.13
  -6  -4   8   18.62    9.39
  -6   4  -9  159.10   40.36
  -6   4  -9  146.31   39.38
  -6  -4   9  139.87   38.40
  -6   4 -10   21.70   11.52
  -6   4 -10    5.93   12.19
   6   4 -10   12.06   12.23
   6   4 -11  101.76   43.07
  -6   4 -11  173.99   43.59
  -6   4 -11  185.96   43.19
   6   4 -12   17.60   13.75
  -6   4 -12   25.96   13.56
  -6   4 -12   21.24   14.45
  -6   4 -13  165.16   37.59
   6   4 -13   64.46   37.30
  -6   4 -13  151.12   37.85
  -6   4 -14   53.29   16.70
   6   4 -14   21.01   16.29
  -6   4 -14    6.47   14.95
  -6   4 -15  114.15   34.79
   6   4 -15   51.97   34.44
   7   4  13    2.34   13.03
  -7   4  13   -6.44   12.74
  -7  -4 -13  -15.61   16.46
   7   4  12  150.38   39.72
  -7   4  12   94.24   39.31
  -7  -4 -12  195.63   41.85
   7   4  11   15.34   12.27
  -7  -4 -11    9.42   15.45
  -7   4  11   13.69   12.77
  -7   4  10   91.70   27.60
   7   4  10   93.08   26.98
   7   4   9   28.46   11.61
  -7   4   9    8.84   13.09
   7   4   8  194.11   49.73
  -7   4   8  190.55   50.65
   7  -4  -8  147.37   49.33
  -7  -4  -8  226.85   51.66
   7   4   8  204.02   51.52
   7  -4  -7   16.93    8.78
  -7  -4  -7   -8.26   13.41
  -7   4   7   -3.22   11.84
   7   4   7  -14.84   14.46
  -7  -4  -6  376.83   66.44
   7  -4  -6  165.65   64.19
  -7   4   6  237.76   65.60
   7   4   6  253.17   66.12
   7  -4  -5   -3.45    8.26
  -7  -4  -5   -6.86   13.14
  -7   4   5   -2.42   11.49
   7   4   5   -0.88   12.64
   7   4   4   27.71   15.21
   7  -4  -4   16.36   11.48
  -7   4   4   38.14   14.75
  -7  -4  -4   43.87   15.72
  -7  -4  -3    5.59   11.47
   7  -4  -3   -0.50    8.11
   7   4   3   -3.41   12.37
  -7   4   3   -3.26   11.75
   7  -4  -2    4.63    8.53
   7   4   2   -8.40   11.86
  -7  -4  -2  -10.80   11.50
  -7   4   2    1.64   11.28
  -7  -4  -1  -10.41   11.21
   7   4   1   -4.99   11.96
  -7   4   1   20.69   11.56
   7  -4  -1    3.18    8.59
  -7  -4   0   78.17   18.94
   7  -4   0   55.37   17.33
   7   4   0   28.96   18.71
  -7   4   0   52.65   19.72
  -7  -4   1   15.19   11.17
   7   4  -1  -11.57   12.26
   7  -4   1   -0.57    9.20
  -7   4  -1   22.81   12.02
   7  -4   2   88.80   30.83
  -7   4  -2  113.05   29.64
  -7  -4   2  146.87   31.73
   7   4  -2   95.19   31.91
   7  -4   3    9.37   10.55
  -7   4  -3   11.79    7.36
  -7  -4   3    4.47   10.65
   7   4  -3   18.32   12.28
   7  -4   4  194.60   63.17
  -7   4  -4  278.77   64.34
  -7   4  -4  244.94   62.40
  -7  -4   4  291.66   63.35
   7   4  -4  175.73   63.59
  -7   4  -5    7.72    8.36
   7   4  -5   38.35   12.73
  -7  -4   5    0.59   10.31
  -7   4  -5   23.23   13.67
   7  -4   5   -6.20   11.42
   7   4  -6  127.46   51.19
  -7   4  -6  200.81   51.66
   7  -4   6  179.21   50.86
  -7  -4   6  226.57   50.47
  -7   4  -6  192.68   50.01
  -7   4  -7    7.58   10.18
   7   4  -7   30.06   13.44
  -7  -4   7   17.53   10.45
  -7   4  -7   -2.77   13.51
  -7   4  -8  157.30   42.11
   7   4  -8  105.86   41.79
  -7  -4   8  147.96   40.29
  -7   4  -8  178.54   40.73
  -7   4  -9    2.43   10.27
  -7   4  -9   -1.92   13.29
   7   4  -9    8.35   12.79
  -7   4 -10  130.76   30.85
   7   4 -10   55.30   31.33
  -7   4 -10  125.27   32.53
  -7   4 -11  -15.70   12.40
   7   4 -11   -8.83   14.10
  -7   4 -11   -6.99   14.62
  -7   4 -12   53.00   15.51
   7   4 -12    8.09   15.88
  -7   4 -12   19.33   16.71
   8   4  10   -1.13   16.15
  -8   4  10   -1.81   13.50
   8   4   9   16.55   16.56
  -8  -4  -9   14.33   16.09
  -8   4   9    9.98   14.14
  -8  -4  -8   10.71   15.66
  -8   4   8  -12.75   13.40
   8   4   8  -19.37   16.79
   8   4   7   76.65   28.85
  -8  -4  -7  126.73   29.19
  -8   4   7   69.53   27.70
   8   4   6   11.30   14.39
  -8  -4  -6   -3.02   14.32
  -8   4   6    8.27   13.32
  -8  -4  -5  146.64   33.66
   8   4   5   85.54   33.21
  -8   4   5  102.57   32.92
   8   4   4  -12.86   14.40
  -8  -4  -4  -10.42   13.99
  -8   4   4    9.30   13.72
  -8   4   3  249.20   63.60
   8   4   3  249.51   63.85
   8  -4  -3  140.28   61.80
  -8  -4  -3  334.37   63.90
   8   4   2  -15.40   14.60
   8  -4  -2   -1.22    9.98
  -8  -4  -2   -9.79   13.37
  -8   4   2    3.78   13.50
   8   4   1  175.51   56.38
  -8   4   1  228.72   56.44
   8  -4  -1  145.69   54.86
  -8  -4  -1  285.39   56.51
  -8  -4   0   -5.01   12.89
   8  -4   0    8.41   10.72
   8   4   0    2.84   13.83
  -8   4   0    2.89   13.00
   8   4  -1  109.70   35.22
  -8  -4   1  162.23   35.03
   8  -4   1   81.67   33.28
  -8   4  -1  130.42   35.26
  -8  -4   2   -6.24   12.86
   8  -4   2    6.25   10.70
   8   4  -2   19.86   13.13
  -8   4  -2  -17.74   13.97
   8   4  -3   38.92   15.97
  -8  -4   3   13.55   13.59
   8  -4   3   20.94   13.29
   8   4  -4   -9.55   13.32
   8  -4   4  -13.54   11.85
  -8  -4   4   -6.53   11.96
   8   4  -5    8.68   13.89
  -8  -4   5   11.86   11.81
   8  -4   5    1.57   12.65
  -8   4  -5   32.88   15.68
   8   4  -6    0.98   13.00
  -8  -4   6   -7.36   10.98
  -8   4  -6    1.04   14.65
   8  -4   6    9.02   12.59
   8   4  -7   28.75   15.24
  -8   4  -7   38.17   16.83
   8  -4   7    9.44   14.42
  -8   4  -8   -7.55   14.62
   8   4  -8   12.11   14.37
   8  -4   8   -7.18   13.39
  -8   4  -9   86.64   24.86
   8   4  -9   39.08   23.03
   8  -4   9   73.23   23.41
   9   4   3   15.41   17.05
  -9  -4  -3   30.25   16.43
  -9   4   3   11.69   15.53
   9   4   2  -13.06   15.90
  -9  -4  -2  -13.18   14.73
  -9   4   2   19.31   15.47
  -9  -4  -1   18.70   15.28
   9   4   1    2.16   15.44
  -9   4   1   18.42   15.16
   9   4   0    6.43   16.49
  -9  -4   0    7.65   14.30
  -9   4   0   35.04   16.64
   9   4  -1   -3.20   15.26
  -9  -4   1   33.37   15.40
  -9   4  -1    3.32   15.75
   9   4  -2   94.98   34.32
   9  -4   2   88.07   32.74
  -9   4  -2  132.27   34.96
  -9  -4   2  139.29   33.98
   0  -5 -20   49.83   22.05
   0   5  20   94.31   25.66
   0  -5 -19    3.16   10.83
   0   5  19    4.10   15.16
   0  -5 -18  131.42   43.60
   0   5  18  203.81   45.81
   0  -5 -17    4.38   10.47
   0   5  17   27.27   14.85
   0   5  16  233.84   48.07
   0  -5 -16  133.58   46.17
   0  -5 -15    7.36    8.91
   0   5  15   -0.80   12.26
   0   5  14   90.40   22.74
   0  -5 -14   56.76   20.67
   0   5  13  -15.32   11.43
   0  -5 -13    1.82    8.02
   0   5  12  172.88   38.68
   0  -5 -12  117.43   37.77
   0   5  11   -4.81    9.05
   0  -5 -11    9.81    7.74
   0   5  11    2.50    8.11
   0   5  10   -0.51    7.66
   0   5  10   -7.10    7.50
   0   5  10    1.67    8.63
   0  -5 -10    5.15    7.06
   0   5   9    3.58    6.71
   0   5   9   -6.13    7.16
   0   5   9   -0.51    8.25
   0  -5  -9    0.49    6.68
   0   5   8  721.75  147.01
   0   5   8  506.09  146.74
   0  -5  -8  536.11  146.78
   0   5   7   -4.36    6.35
   0  -5  -7   -7.26    5.87
   0  -5  -6 1039.65  261.06
   0   5   6  973.85  260.95
   0  -5  -6 1060.02  261.04
   0  -5  -5    3.83    6.03
   0   5   4  730.66  185.45
   0   5   3   -1.77    3.50
   0   5   3    5.74    4.77
   0   5   2  729.34  243.05
   0   5   2 1144.69  242.97
   0  -5  -2  965.11  243.19
   0  -5  -2  886.31  242.90
   0   5   1   -2.28    3.22
   0  -5  -1    4.08    4.66
   0   5   1   -1.29    4.22
   0  -5  -1    2.22    3.19
   0   5   0  857.62  248.57
   0   5   0  985.21  248.50
   0  -5   0  967.13  248.50
   0  -5   0 1110.10  248.69
   0   5  -1    2.18    4.42
   0  -5   1    0.19    3.65
   0   5  -1   -5.92    4.00
   0  -5   1   -3.88    4.07
   0  -5   2  198.05   55.29
   0   5  -2  224.25   55.33
   0  -5   2  188.61   55.26
   0   5  -2  279.50   55.70
   0   5  -2  204.87   55.21
   0  -5   3   -3.30    4.55
   0   5  -3   -0.27    4.73
   0   5  -3    2.40    3.46
   0   5  -3    3.99    4.88
   0   5  -4  177.99   38.99
   0  -5   4  125.84   39.19
   0   5  -4  171.52   39.48
   0   5  -4  122.23   38.82
   0  -5   5    3.91    5.33
   0   5  -5   -5.06    3.35
   0   5  -5   -3.91    3.55
   0  -5   5    0.36    5.93
   0   5  -5   -2.69    5.58
   0  -5   6   26.19    9.65
   0   5  -6   28.03    8.18
   0  -5   6   19.73    9.80
   0   5  -6   29.40    8.30
   0   5  -6   35.78   10.03
   0  -5   7    0.40    6.02
   0  -5   7   -1.25    6.42
   0   5  -7    5.21    3.48
   0   5  -7   -6.77    6.53
   0   5  -7    0.42    3.14
   0   5  -8  256.78  124.58
   0  -5   8  597.29  125.49
   0  -5   8  568.21  125.56
   0   5  -8  615.29  124.75
   0   5  -8  809.54  125.97
   0   5  -9    1.34    2.94
   0  -5   9    0.48    7.19
   0   5  -9   -2.33    3.18
   0  -5   9   -4.38    7.38
   0   5  -9    2.66    7.53
   0   5 -10  522.15  139.24
   0   5 -10  696.31  140.49
   0   5 -11   -2.62    3.22
   0   5 -11   -4.34    9.19
   0   5 -12  204.50   58.18
   0   5 -12  399.28   60.73
   0   5 -13    4.48    3.07
   0   5 -13   -0.72   10.69
   0  -5  13   -1.37    3.08
   0   5 -14  431.95  111.37
   0   5 -15  -13.15   12.98
   0   5 -16  392.52  101.83
   0   5 -17   -0.93   13.36
   0   5 -18   30.69   17.24
   0   5 -19   18.88   15.85
   0   5 -20    2.22   15.36
   1   5  20   -2.22   16.25
  -1   5  20   -2.11   16.17
   1  -5 -20    3.13   10.05
  -1  -5 -20    6.92   12.01
  -1   5  19   -4.99   15.01
   1  -5 -19   -6.82   10.12
  -1  -5 -19    1.67   11.39
   1  -5 -18   -2.93    9.88
  -1  -5 -18   15.26   11.19
  -1   5  18   -9.42   14.26
  -1   5  17   21.25   13.49
   1  -5 -17   -1.41    9.45
  -1  -5 -17    5.40   10.70
  -1   5  16    0.83   12.60
   1  -5 -16   -7.45    9.12
   1  -5 -15   72.67   28.69
  -1   5  15  124.48   30.54
  -1  -5 -15  124.21   29.60
  -1   5  14   32.62   10.41
  -1   5  14   32.71   13.63
   1  -5 -14   22.35   10.91
  -1  -5 -14   20.19   11.90
  -1   5  13  388.08   79.68
  -1  -5 -13  325.68   79.14
   1  -5 -13  218.56   78.70
   1  -5 -12   12.97    8.46
  -1  -5 -12   12.14    9.11
  -1   5  12    9.44   10.45
  -1   5  11  522.99  110.47
  -1  -5 -11  478.62  110.27
   1  -5 -11  358.67  109.86
  -1   5  11  335.89  109.89
   1   5  10  101.96   22.74
  -1   5  10   62.72   21.55
   1  -5 -10   49.88   21.40
  -1   5  10   78.86   22.40
  -1   5  10   82.58   22.09
  -1  -5 -10   93.28   22.17
   1   5  10   76.92   22.07
   1   5   9  543.18  112.05
  -1   5   9  450.41  111.88
   1   5   9  454.83  111.84
   1   5   9  522.79  112.16
  -1   5   9  475.00  111.98
  -1   5   9  309.08  111.53
  -1  -5  -9  445.70  111.86
   1  -5  -9  343.76  111.59
   1   5   8    2.25    6.96
  -1   5   8   -3.40    6.89
   1   5   8   16.10    7.91
   1  -5  -8   -8.67    6.16
  -1   5   8    2.30    6.86
  -1   5   8    5.91    6.25
  -1  -5  -8   -7.67    6.62
   1   5   8    7.51    6.57
   1   5   7  530.95  132.47
   1   5   7  657.69  132.75
  -1  -5  -7  550.20  132.55
   1   5   7  658.50  132.71
  -1   5   7  350.42  132.21
  -1   5   7  574.62  132.57
   1  -5  -7  380.55  132.23
   1  -5  -6    1.46    6.28
   1   5   6   15.72    7.10
  -1   5   6    2.35    5.84
   1  -5  -6   -3.25    5.95
  -1   5   6    7.20    5.66
   1  -5  -5  312.98  109.40
   1   5   5  586.69  109.89
  -1  -5  -5  426.52  109.62
   1  -5  -5  393.35  109.53
  -1   5   5  333.05  109.42
  -1   5   5  531.20  109.73
  -1  -5  -4   12.92    6.29
   1   5   4    8.12    6.37
  -1   5   4   12.22    6.30
   1   5   4    9.99    5.54
   1   5   4   18.18    6.17
   1  -5  -4    5.11    6.03
  -1   5   4    8.60    3.06
  -1  -5  -3   60.02   18.16
  -1   5   3   70.86   18.36
   1  -5  -3   60.55   18.15
  -1  -5  -3   63.00   18.30
   1   5   3   78.00   18.35
   1   5   3   77.02   18.08
   1   5   3   50.38   18.01
  -1   5   2    3.34    4.98
   1   5   2   17.70    5.35
  -1  -5  -2    9.70    5.48
   1  -5  -2    3.50    5.25
  -1  -5  -2    5.12    4.97
  -1   5   2   -0.92    5.47
   1   5   2    6.64    5.03
   1   5   2    8.70    5.35
  -1  -5  -2    0.45    4.72
   1  -5  -1   82.31   32.88
  -1  -5  -1  130.56   33.13
   1   5   1  176.01   33.30
   1  -5  -1  112.40   33.03
  -1   5   1  144.05   33.15
   1   5   1  164.62   33.02
  -1  -5  -1  170.82   33.12
  -1  -5  -1  120.03   32.88
   1   5   1  147.23   33.00
  -1   5   1  134.75   33.00
   1  -5  -1  103.22   32.36
   1  -5   0  322.34   85.13
   1   5   0  372.62   85.46
  -1  -5   0  324.66   85.54
   1  -5   0  330.08   85.55
   1  -5   0   75.85   85.20
   1   5   0  426.98   85.66
  -1   5   0  335.11   85.49
  -1  -5   0  404.79   85.51
  -1  -5   0  361.44   85.46
   1   5   0  402.24   85.55
  -1   5   0  389.92   85.68
   1   5  -1  327.79   84.37
   1  -5   1  287.86   84.07
  -1   5  -1  360.37   84.38
   1  -5   1  297.74   84.42
   1   5  -1  312.71   84.22
  -1  -5   1  288.60   84.37
   1   5  -1  395.86   84.51
  -1   5  -1  373.36   84.54
  -1  -5   1  364.81   84.29
  -1  -5   1  289.58   84.30
   1   5  -2   16.03    6.36
  -1  -5   2   19.77    7.30
   1   5  -2   18.22    7.27
   1  -5   2   18.66    6.68
  -1   5  -2   30.26    7.36
  -1  -5   2   19.62    7.48
   1  -5   2   11.66    7.48
   1   5  -2   26.81    7.52
  -1   5  -2   26.35    7.70
  -1   5  -2    9.61    6.84
  -1  -5   2   21.37    6.60
   1   5  -3  522.13  134.11
   1  -5   3  513.49  133.94
  -1   5  -3  389.83  133.90
  -1   5  -3  737.32  134.17
   1   5  -3  668.36  134.29
   1  -5   3  496.86  134.15
  -1  -5   3  498.36  134.10
  -1  -5   3  449.64  134.02
  -1   5  -3  609.16  134.28
   1   5  -3  438.41  133.76
  -1  -5   3  516.25  133.80
  -1  -5   4   -0.98    5.25
   1   5  -4    3.14    5.40
   1  -5   4   -3.28    5.15
  -1   5  -4   -1.00    4.58
   1   5  -4   -3.82    2.97
  -1  -5   4   -2.89    5.10
   1  -5   4   -9.38    6.00
   1   5  -4    5.47    5.33
  -1   5  -4    0.96    4.27
  -1  -5   4   -0.13    3.01
  -1  -5   5 1162.89  317.46
   1   5  -5 1244.04  317.53
   1   5  -5  942.03  316.96
  -1   5  -5 1845.20  317.48
  -1  -5   5 1370.68  317.51
   1  -5   5 1381.30  317.60
   1   5  -5 1724.23  317.73
   1  -5   5 1314.24  317.42
  -1  -5   6   10.99    6.13
   1  -5   6    1.42    5.94
   1  -5   6   -0.71    4.44
  -1  -5   6    4.09    6.17
   1  -5   6    1.21    6.36
   1   5  -6   -1.57    1.72
   1   5  -6    6.75    6.40
  -1   5  -6    3.95    4.42
   1   5  -6    5.27    1.44
   1   5  -6    3.19    6.06
  -1  -5   7  550.82  181.32
   1  -5   7  663.32  181.37
   1   5  -7  640.80  181.46
   1  -5   7  695.11  181.11
  -1   5  -7  820.51  181.20
  -1  -5   7  650.74  181.44
   1  -5   7  662.62  181.49
   1   5  -7  827.71  181.63
   1  -5   8   89.80   32.26
  -1  -5   8   90.78   32.36
  -1   5  -8  132.59   31.89
  -1  -5   8  107.10   32.47
   1   5  -8  149.57   32.74
   1  -5   8  120.65   31.79
   1  -5   9  373.32  108.27
  -1   5  -9  463.36  107.89
   1  -5   9  397.35  107.81
  -1  -5   9  351.28  108.27
   1   5  -9  506.87  108.61
  -1  -5   9  309.35  108.18
  -1   5 -10   32.32   10.03
   1   5 -10   51.98   12.19
   1  -5  10   18.75    9.60
  -1  -5  10   25.27   11.55
   1   5 -11  120.14   33.27
   1  -5  11  112.12   31.94
  -1   5 -11  131.41   32.09
  -1   5 -12    5.06    5.98
   1  -5  12    3.22    5.75
   1   5 -12   13.53    9.77
   1  -5  13  -16.59    6.52
   1   5 -13  -18.02   11.16
  -1   5 -13   -0.58    6.21
   1   5 -14   -2.97   10.71
  -1   5 -14    3.27    6.23
  -1   5 -14    4.76   12.02
  -1   5 -15   44.06   20.08
   1   5 -15   86.74   20.13
  -1   5 -15   51.24   16.23
   1   5 -16   12.74   12.54
  -1   5 -16    1.81   13.21
  -1   5 -17  104.61   30.24
   1   5 -17   94.06   29.83
  -1   5 -18  -12.21   14.18
   1   5 -18    5.77   14.09
  -1   5 -19   89.43   30.93
   1   5 -19  107.99   30.64
   2   5  20   87.34   28.72
  -2  -5 -20   60.12   26.18
  -2   5  20  113.08   28.64
   2   5  19   22.54   16.67
   2  -5 -19   17.80   11.95
  -2  -5 -19   34.85   14.48
  -2   5  19    7.77   15.95
  -2   5  18   99.78   24.63
   2  -5 -18   21.58   20.88
   2   5  18  115.50   24.91
  -2  -5 -18   63.70   22.88
   2  -5 -17    9.05   11.55
   2   5  17   48.71   16.39
  -2   5  17   34.44   15.72
  -2  -5 -17   14.89   13.53
   2   5  16  284.57   50.81
  -2   5  16  224.56   50.14
  -2  -5 -16  237.93   49.69
   2  -5 -15    5.18    9.20
   2   5  15   20.21   13.75
  -2   5  15   25.70   13.00
  -2  -5 -15   22.77   12.04
  -2   5  14   76.94   26.10
   2   5  14  122.95   28.74
  -2  -5 -14  142.05   28.25
  -2   5  14  131.98   28.56
  -2  -5 -13   48.33   12.76
   2  -5 -13    0.60    9.83
  -2   5  13   16.59    8.92
   2   5  13   27.96   13.15
  -2   5  13   35.51   12.86
  -2   5  12   10.15    6.14
   2   5  12    8.91   10.66
  -2  -5 -12   10.50    9.90
  -2   5  12   14.05   10.42
   2  -5 -12   -9.73    8.04
  -2   5  11    8.01    6.03
   2  -5 -11   14.81    8.19
  -2   5  11    2.01    8.15
  -2   5  11   13.03   10.08
   2   5  11   12.10   10.34
  -2  -5 -11   13.70    9.63
   2  -5 -10    5.25    6.88
  -2   5  10    6.81    8.56
  -2   5  10    7.70    8.00
  -2   5  10   -1.11    5.09
  -2  -5 -10   11.79    8.58
   2   5  10   17.70    9.47
  -2   5  10   -2.41    7.55
   2   5   9    2.99    7.52
  -2   5   9    2.13    4.31
  -2  -5  -9   -7.24    7.86
   2  -5  -9   12.55    6.59
   2   5   9  -17.99    8.71
  -2   5   9   -6.78    7.90
   2   5   9   -0.51    7.88
  -2   5   9   -1.85    6.66
  -2   5   9    1.34    7.14
   2   5   8   38.82   10.74
  -2   5   8   19.42    8.54
  -2  -5  -8   29.35   11.17
  -2   5   8   50.96   10.74
   2   5   8   37.21   11.30
  -2   5   8   31.27   10.90
   2   5   8   44.67   11.32
   2  -5  -8   14.88   10.09
  -2   5   8   23.47   10.05
   2   5   7  108.68   18.61
   2   5   7  104.15   18.74
  -2   5   7   71.37   18.17
   2  -5  -7   11.93   17.31
  -2   5   7   61.54   16.64
  -2   5   7   54.79   17.76
   2   5   6  223.16   36.53
   2  -5  -6  154.84   36.12
   2   5   6  219.62   36.66
  -2   5   6  203.18   36.43
  -2   5   6  112.14   35.14
  -2   5   6  103.46   35.87
   2  -5  -6   69.87   35.77
   2   5   5  371.99   71.08
   2  -5  -5   49.69   70.36
  -2  -5  -5  277.34   70.90
   2  -5  -5  263.86   70.69
   2   5   5  384.56   71.09
  -2   5   5  332.45   70.91
  -2   5   5  211.01   70.65
   2   5   5  350.46   70.98
  -2   5   4 1134.71  270.39
  -2  -5  -4 1078.74  270.41
   2   5   4 1333.89  270.55
  -2  -5  -4 1381.66  270.66
   2  -5  -4  385.72  270.07
   2  -5  -4  987.94  270.30
   2   5   4 1315.86  270.57
   2   5   4 1376.77  270.58
  -2   5   4  871.48  270.30
  -2  -5  -3   28.39    9.85
  -2  -5  -3   28.10    9.76
   2  -5  -3   24.34    9.55
   2   5   3   40.87    9.98
  -2   5   3   25.12    9.62
   2   5   3   26.25    9.90
   2   5   3   36.65   10.19
   2   5   2 1200.32  280.92
  -2  -5  -2  980.78  280.83
  -2  -5  -2 1348.12  281.04
   2   5   2 1222.08  280.92
  -2   5   2 1015.98  280.83
  -2  -5  -2  987.26  280.84
   2   5   2 1206.46  280.96
   2  -5  -2  866.45  280.74
  -2   5   1  138.79   48.72
  -2   5   1  264.00   49.11
  -2  -5  -1  210.00   48.78
   2  -5  -1  162.21   48.69
  -2  -5  -1  294.83   49.05
  -2   5   1  212.82   48.82
   2  -5  -1  144.31   48.07
   2   5   1  247.64   48.87
   2   5   1  245.72   48.87
   2   5   1  266.77   49.04
  -2  -5  -1  205.15   48.84
   2  -5   0  671.85  223.36
  -2   5   0  600.50  223.34
  -2  -5   0  738.25  223.35
  -2  -5   0 1111.90  223.52
   2   5   0 1003.21  223.44
  -2   5   0  868.03  223.46
  -2   5   0 1058.23  223.67
  -2  -5   0  806.49  223.45
   2   5   0  846.66  223.40
   2   5   0  983.19  223.58
   2   5  -1   90.19   22.01
  -2   5  -1  103.85   22.52
  -2  -5   1   79.70   22.17
  -2  -5   1  110.81   22.15
   2   5  -1   68.57   22.04
  -2   5  -1   94.75   22.40
   2  -5   1   81.04   22.27
  -2   5  -1   17.37   21.87
  -2  -5   1   63.81   22.15
   2   5  -1   93.67   22.46
  -2  -5   2  830.65  171.91
  -2   5  -2  148.48  171.65
  -2   5  -2  884.19  172.28
  -2  -5   2  551.46  171.89
   2  -5   2  576.64  172.01
   2   5  -2  705.55  172.01
  -2   5  -2  841.85  172.21
   2   5  -2  693.60  172.14
  -2  -5   2  561.69  171.99
   2   5  -2  726.83  171.84
  -2  -5   3   71.80   23.92
   2  -5   3   97.35   23.89
  -2   5  -3  101.04   24.01
  -2  -5   3   65.66   23.62
  -2  -5   3   90.48   23.33
   2  -5   3   85.71   23.95
   2   5  -3   92.26   24.09
   2   5  -3   89.08   23.77
  -2   5  -3  105.31   24.01
   2   5  -3   85.53   23.33
  -2  -5   4   37.54   13.43
   2   5  -4   48.17   13.44
   2  -5   4   52.70   13.25
  -2  -5   4   40.37   12.26
  -2  -5   4   37.70   13.15
  -2   5  -4   47.08   13.35
   2  -5   4   50.94   13.52
   2   5  -4   47.46   13.28
  -2   5  -4   52.19   13.47
   2   5  -4   46.78   12.32
  -2  -5   5   46.61   15.96
  -2   5  -5   73.78   16.12
   2  -5   5   68.20   15.89
  -2  -5   5   53.95   14.72
  -2  -5   5   51.93   15.76
   2   5  -5   50.82   14.73
   2  -5   5   61.02   16.17
   2   5  -5   63.68   16.01
  -2   5  -5   63.08   16.30
   2   5  -5   53.82   16.25
   2  -5   6    7.84    5.57
  -2  -5   6   10.93    6.37
  -2  -5   6    4.16    1.46
  -2  -5   6   10.34    6.02
   2  -5   6    5.86    6.37
  -2   5  -6   12.50    5.90
   2   5  -6   20.18    6.35
  -2   5  -6    5.43    6.64
  -2  -5   7  129.11   48.70
   2  -5   7  180.87   48.57
  -2  -5   7  140.76   48.59
  -2   5  -7  231.99   48.75
   2  -5   7  134.98   48.75
   2   5  -7  170.46   48.72
  -2   5  -7  255.91   49.29
  -2   5  -8   56.62   15.45
   2  -5   8   49.21   15.20
  -2  -5   8   43.42   15.53
   2  -5   8   34.03   15.85
  -2  -5   8   30.52   15.79
   2   5  -8   66.58   15.91
  -2   5  -8   61.55   16.26
  -2   5  -9   33.64   10.66
   2  -5   9   32.67   10.33
  -2  -5   9   23.02   11.17
   2   5  -9   28.86   11.56
  -2   5  -9   32.69   12.12
   2  -5  10  384.70  110.34
  -2  -5  10  326.07  110.58
  -2   5 -10  483.32  110.55
   2   5 -10  446.11  110.83
  -2   5 -10  452.87  111.14
  -2   5 -11   44.90   15.42
   2  -5  11   45.49   15.12
  -2   5 -11   61.23   17.33
   2   5 -11   58.58   16.69
   2  -5  12  346.56  105.50
   2   5 -12  417.25  106.20
  -2   5 -12  463.15  106.70
  -2   5 -12  426.32  105.71
  -2   5 -13   67.38   20.22
   2   5 -13   61.45   19.08
  -2   5 -13   60.75   17.48
   2  -5  13   49.30   17.16
  -2   5 -14  231.59   63.16
   2   5 -14  262.44   62.58
  -2   5 -14  226.21   61.49
  -2   5 -15   44.52   17.57
   2   5 -15   36.10   15.74
  -2   5 -15   38.73   13.25
   2   5 -16   54.18   19.61
   2   5 -17    4.37   12.73
   2   5 -18   53.01   20.75
   2   5 -19   18.74   15.48
   3   5  19    7.68   16.04
  -3  -5 -19   -3.86   13.52
  -3   5  19   13.16   15.27
   3   5  18   23.84   15.64
   3  -5 -18   -9.40   10.52
  -3  -5 -18  -13.97   13.10
  -3   5  18   -0.89   13.77
   3  -5 -17   14.78   10.89
   3   5  17    2.93   14.99
  -3  -5 -17   13.45   12.98
  -3   5  17   24.16   13.87
  -3  -5 -16   32.74   13.81
   3   5  16   31.26   15.02
   3  -5 -16   -3.42   10.78
  -3   5  16   25.00   14.04
   3   5  15   43.17   15.78
  -3   5  15   45.33   14.64
   3  -5 -15    9.95   12.24
  -3   5  14   21.83   12.18
  -3  -5 -14   25.33   13.01
   3   5  14   15.37   12.99
   3  -5 -14   11.56   10.01
  -3  -5 -13   83.95   16.37
   3   5  13   63.50   16.65
  -3   5  13   39.39   15.56
  -3   5  13   39.48   12.89
  -3  -5 -12   46.90   14.09
   3   5  12   48.60   14.46
  -3   5  12   44.84   13.62
  -3   5  12   31.52   10.57
  -3   5  11  282.06   85.02
   3   5  11  528.40   86.77
  -3   5  11  456.53   86.25
  -3  -5 -11  481.12   86.65
  -3   5  10  111.49   32.56
   3   5  10  202.81   34.66
  -3   5  10  142.64   33.77
  -3  -5 -10  175.79   34.64
  -3   5  10  144.22   33.54
  -3   5   9  586.37  124.22
  -3  -5  -9  746.44  125.01
   3   5   9  753.73  124.88
  -3   5   9  427.14  123.53
  -3   5   9  585.92  124.33
  -3   5   9  336.73  123.89
   3  -5  -9   68.39  123.56
  -3   5   8  191.70   40.71
   3   5   8  169.36   41.06
  -3   5   8  160.99   40.75
  -3   5   8  127.24   39.78
   3   5   8  224.21   41.18
  -3   5   8   98.79   40.35
   3   5   7  324.47   59.90
  -3   5   7  256.20   59.50
   3   5   7  295.95   59.93
  -3   5   7  215.14   59.50
  -3   5   7  188.86   58.78
  -3   5   7  190.78   59.43
   3   5   6   86.19   17.40
  -3   5   6   56.27   17.37
  -3   5   6   44.95   15.64
   3  -5  -6   54.99   16.96
   3   5   6   85.35   17.59
  -3   5   6   57.45   17.01
  -3   5   6   57.72   17.14
   3   5   6   86.72   17.88
   3   5   6   70.85   17.80
   3  -5  -5   37.55   12.89
  -3   5   5   53.28   13.78
  -3   5   5   27.21   11.35
   3   5   5   63.49   13.59
  -3   5   5   36.72   12.98
  -3   5   5   41.60   13.19
  -3  -5  -5   73.25   14.15
   3   5   5   78.04   13.60
   3   5   5   73.28   13.97
   3   5   5   56.15   14.06
   3   5   4   13.99    7.62
   3  -5  -4    8.67    3.54
   3   5   4   14.90    7.41
   3  -5  -4   13.62    6.45
  -3   5   4   18.25    7.64
   3   5   4   14.03    6.88
  -3   5   4   18.34    6.54
  -3  -5  -4   13.82    7.35
  -3   5   4   11.23    6.85
   3   5   3    0.88    6.59
   3  -5  -3   -0.80    1.78
  -3  -5  -3   -1.93    5.58
   3   5   3   -0.40    5.97
   3  -5  -3    6.55    5.07
   3   5   3    5.79    5.63
  -3   5   3   -6.77    6.30
  -3   5   3   -2.20    5.30
  -3  -5  -3   -6.02    6.56
   3   5   2   -2.61    5.99
  -3  -5  -2   11.09    5.57
   3  -5  -2    0.29    4.98
   3   5   2   -2.22    5.62
  -3   5   2    5.24    5.11
   3   5   2    0.86    6.24
   3  -5  -2   -0.60    2.26
  -3  -5  -2    2.80    6.42
   3  -5  -1   21.75    6.91
  -3  -5  -1   16.43    7.94
   3   5   1   29.53    8.74
   3  -5  -1   19.86    8.14
   3   5   1   25.98    8.26
  -3   5   1   23.74    8.20
  -3  -5  -1   17.42    8.73
   3   5   1   30.03    9.17
  -3  -5  -1   36.65    9.47
  -3  -5   0   12.01    7.48
   3   5   0   19.41    7.83
  -3  -5   0    5.18    6.03
   3   5   0   14.46    6.53
   3  -5   0    1.19    6.05
  -3   5   0   10.95    6.96
   3   5   0   13.76    6.04
  -3   5   0   10.56    7.13
  -3   5   0   20.82    6.60
  -3  -5   0   17.05    6.97
  -3  -5   1  335.51   65.00
   3  -5   1  271.93   65.14
  -3  -5   1  198.28   64.67
  -3   5  -1  299.32   65.28
   3   5  -1  277.27   65.19
   3  -5   1  166.55   64.70
   3   5  -1  193.95   64.64
  -3  -5   1  215.23   65.01
  -3   5  -1  272.85   64.93
   3   5  -1  291.23   64.86
  -3  -5   2  154.04   33.52
  -3  -5   2   78.46   33.59
   3  -5   2  131.21   33.79
  -3   5  -2  165.79   34.12
   3  -5   2   93.51   33.48
   3   5  -2  111.55   33.40
  -3   5  -2  146.07   33.70
   3   5  -2  138.59   33.39
  -3  -5   2   98.26   33.31
  -3  -5   3  711.30  152.37
  -3  -5   3  471.66  152.53
   3  -5   3  616.49  152.66
  -3   5  -3  677.07  152.79
  -3  -5   3  395.49  152.24
   3   5  -3  583.08  152.38
   3  -5   3  484.12  152.41
  -3   5  -3  682.89  152.63
   3   5  -3  623.64  152.30
  -3  -5   4  207.21   47.04
   3  -5   4  166.17   47.49
  -3   5  -4  215.55   47.71
  -3  -5   4  120.21   47.05
   3  -5   4  144.17   47.36
   3   5  -4  189.03   47.24
   3   5  -4  186.98   46.97
  -3   5  -4  207.52   47.56
  -3  -5   4  136.16   47.45
   3   5  -5  568.13  152.09
  -3  -5   5  629.29  152.12
   3  -5   5  591.09  152.59
  -3   5  -5  720.24  152.84
  -3  -5   5  433.79  152.26
   3  -5   5  498.95  152.50
   3   5  -5  601.26  152.43
  -3   5  -5  703.30  152.77
  -3  -5   6  166.38   40.98
   3   5  -6  147.66   40.95
  -3  -5   6  109.59   41.45
  -3   5  -6  187.62   42.11
   3  -5   6  136.25   41.85
   3  -5   6  156.29   41.84
   3   5  -6  167.99   41.67
  -3   5  -6  197.80   42.18
   3   5  -7  293.80   88.27
  -3  -5   7  336.69   89.02
  -3  -5   7  336.03   88.30
   3  -5   7  448.20   89.36
  -3   5  -7  544.57   89.71
   3   5  -7  453.24   89.26
  -3   5  -7  513.97   89.77
   3  -5   7  410.80   89.48
   3  -5   8   78.46   18.88
  -3  -5   8   61.29   18.41
  -3   5  -8   63.52   18.93
  -3   5  -8   69.47   19.41
   3  -5   8   47.42   18.93
   3   5  -8   65.33   18.66
   3   5  -9  132.47   42.46
  -3  -5   9  133.75   41.91
  -3   5  -9  171.97   42.35
   3   5  -9  182.21   42.25
  -3   5  -9  176.12   42.75
   3  -5   9  144.92   42.03
  -3   5 -10   43.94   13.47
   3   5 -10   20.47   13.97
   3  -5  10   33.35   12.89
   3   5 -10   51.04   13.62
  -3  -5  10   34.56   13.12
  -3   5 -10   41.66   14.49
  -3   5 -11   11.02   10.81
  -3   5 -11    4.05    8.83
   3   5 -11   14.25    9.71
   3   5 -11   18.09   10.61
   3  -5  11   23.89    8.70
   3   5 -12   -1.19    9.68
  -3   5 -12   -1.56    8.14
   3  -5  12   -1.44    8.01
  -3   5 -12   11.08   10.92
   3   5 -13    4.48    9.96
  -3   5 -13   -9.07    8.97
  -3   5 -13   -1.58   11.18
   3   5 -14   -9.63   10.64
  -3   5 -14    6.02    9.08
  -3   5 -14   -2.53   12.20
  -3   5 -15    2.70   12.93
  -3   5 -15   10.64    9.64
   3   5 -15    2.21   11.48
  -3   5 -16   26.74   14.62
   3   5 -16   10.26   12.84
  -3   5 -16    6.29   10.25
   3   5 -17  153.07   39.08
  -3   5 -17  123.53   39.57
  -3   5 -18   42.88   18.44
   3   5 -18   21.47   16.58
  -4   5  18   60.31   20.26
  -4   5  18   36.30   17.57
  -4  -5 -18   63.85   20.68
   4   5  18   48.67   21.13
  -4   5  17   39.98   26.09
  -4  -5 -17   96.84   28.56
   4   5  17  132.79   29.65
  -4   5  17  111.85   28.10
  -4  -5 -16   66.96   20.02
   4   5  16   55.47   19.86
  -4   5  16   26.34   16.86
  -4   5  16   59.91   18.76
  -4  -5 -15   97.08   27.37
  -4   5  15   96.68   26.46
  -4   5  15   55.67   25.42
   4   5  15  114.90   27.88
   4   5  14   72.92   18.65
  -4   5  14   38.74   15.62
  -4   5  14   37.89   16.10
  -4  -5 -14   33.99   17.22
   4   5  13   26.34   14.84
  -4  -5 -13   39.29   15.31
  -4   5  13   29.18   14.01
  -4   5  13   39.14   13.54
   4   5  12    1.45   11.31
  -4   5  12   10.35    9.68
  -4   5  12   18.05    9.67
  -4  -5 -12  -10.41   11.72
  -4   5  11    2.95    5.97
  -4   5  11   13.04    8.14
  -4   5  11   -1.89    9.19
   4   5  11  -12.10   10.90
  -4   5  11    8.36    9.23
  -4  -5 -11   -0.77   10.57
  -4   5  10    2.35    5.88
  -4   5  10    4.48    7.56
   4   5  10   -0.62    9.97
  -4   5  10   -8.62    9.33
  -4   5  10    9.66    8.34
  -4  -5 -10   22.69   11.10
  -4   5   9   42.10   12.67
   4   5   9   44.97   15.14
  -4   5   9   31.27   14.97
  -4   5   9   44.58   14.46
  -4  -5  -9   62.86   16.23
  -4   5   9   39.09   13.84
  -4   5   8   26.43    8.46
   4   5   8   43.51   11.10
   4   5   8   22.85   10.94
  -4   5   8   43.51   11.79
  -4   5   8   11.12   10.26
   4   5   8   33.33   12.38
  -4   5   8   10.02    9.49
  -4   5   7  172.38   39.89
  -4   5   7  139.92   40.43
   4   5   7  186.72   40.59
  -4   5   7  141.84   39.95
   4   5   7  156.00   40.79
  -4   5   7  128.46   39.27
   4   5   7  177.50   40.28
  -4  -5  -6  224.65   39.17
  -4   5   6  138.40   38.45
   4   5   6  168.98   38.37
  -4   5   6  124.93   37.80
   4  -5  -6  120.47   37.14
  -4   5   6  115.91   37.14
   4   5   6  176.73   39.00
   4   5   6  189.54   38.21
   4   5   5  208.84   45.22
   4  -5  -5  150.60   44.34
  -4  -5  -5  267.12   46.08
   4   5   5  185.05   45.79
  -4   5   5   63.41   44.83
  -4   5   5  154.01   44.87
   4  -5  -5  164.90   44.84
   4   5   5  197.32   45.34
  -4   5   5  181.10   45.68
   4  -5  -4  234.86   71.76
  -4  -5  -4  439.08   73.26
   4   5   4  365.54   72.51
   4  -5  -4  232.26   72.14
  -4   5   4  293.97   72.83
   4   5   4  351.30   72.56
  -4   5   4  222.98   72.13
   4   5   4  341.84   72.88
  -4   5   4  113.11   72.23
   4   5   4  311.35   72.98
  -4  -5  -3  525.31   93.01
   4  -5  -3  313.81   91.82
  -4   5   3   91.54   92.04
   4  -5  -3  310.51   92.10
  -4   5   3  391.30   92.85
   4   5   3  413.92   92.34
  -4   5   3  289.33   92.09
   4   5   3  503.03   92.85
   4   5   3  445.70   92.91
  -4  -5  -2  393.60   69.99
  -4  -5  -2  259.25   69.21
   4  -5  -2  224.93   69.13
   4   5   2  305.00   69.34
  -4   5   2  237.38   69.14
  -4   5   2   86.39   69.11
   4   5   2  363.05   69.80
   4   5   2  330.03   69.98
   4  -5  -2  241.31   68.87
  -4  -5  -1  310.58   87.13
   4  -5  -1  232.26   87.08
   4   5   1  320.44   87.18
  -4   5   1  331.44   87.21
  -4  -5  -1  518.54   87.90
   4   5   1  451.57   87.68
  -4  -5  -1  333.53   87.66
   4  -5  -1  309.30   86.97
  -4  -5   0  232.20   43.81
  -4  -5   0  149.71   43.10
   4  -5   0  117.50   43.10
   4   5   0  143.88   43.09
  -4   5   0  177.92   43.33
   4   5   0  205.08   43.64
   4  -5   0  159.67   43.01
  -4  -5   0  162.53   43.84
  -4  -5   1  167.36   31.76
   4  -5   1  134.70   31.94
   4  -5   1   87.22   31.08
   4   5  -1   85.05   30.93
  -4  -5   1   91.00   30.93
  -4   5  -1  129.88   31.31
   4   5  -1  135.41   31.46
  -4   5  -1  153.62   32.30
  -4  -5   1  101.06   31.83
  -4  -5   2  115.46   27.94
   4  -5   2  102.46   28.34
  -4  -5   2   74.70   27.37
  -4   5  -2  135.02   28.79
   4  -5   2   81.24   27.65
   4   5  -2   89.18   27.45
   4   5  -2  132.86   27.91
  -4   5  -2  118.49   27.95
  -4  -5   3    5.25    5.46
   4  -5   3   15.81    7.89
  -4  -5   3    7.01    6.56
   4  -5   3    2.89    6.54
  -4   5  -3    9.18    8.00
   4   5  -3    2.20    5.73
  -4   5  -3   19.25    7.35
   4   5  -3   10.42    6.21
   4  -5   4   -6.49    7.93
  -4  -5   4    5.77    5.31
  -4  -5   4   -7.91    5.98
   4  -5   4   -2.72    6.22
  -4   5  -4   -3.82    8.16
   4   5  -4    4.04    5.46
   4   5  -4    2.60    5.37
  -4   5  -4    2.08    7.04
   4  -5   5   10.62    8.05
  -4  -5   5   -1.76    5.65
  -4  -5   5    2.73    5.77
   4  -5   5   10.46    6.94
   4   5  -5   12.00    5.39
  -4   5  -5    4.98    8.35
   4   5  -5    3.39    5.84
  -4   5  -5    1.80    7.22
   4   5  -6   21.70    9.78
  -4  -5   6   10.12    7.12
   4   5  -6   14.98    6.41
  -4  -5   6   11.99    6.54
   4  -5   6    9.92    8.33
  -4   5  -6   20.80    9.66
   4   5  -6   16.04    7.66
  -4   5  -6   20.50    9.13
   4   5  -7   -1.29    8.42
   4   5  -7   -3.53    4.51
  -4  -5   7    9.61    6.38
  -4  -5   7    3.24    4.58
   4  -5   7    8.26    7.67
  -4   5  -7   13.20    8.44
  -4   5  -7   -0.57    8.79
   4   5  -7    6.19    6.72
   4   5  -8   63.71   23.67
  -4  -5   8   86.55   21.36
   4   5  -8   70.61   21.27
  -4   5  -8  112.77   23.90
  -4  -5   8   54.49   22.24
   4   5  -8   93.48   22.65
  -4   5  -8   97.61   23.59
  -4  -5   9   26.28   16.10
   4   5  -9   86.03   19.93
  -4  -5   9   72.90   16.20
  -4   5  -9  130.77   20.41
  -4  -5   9   77.96   18.33
   4   5  -9  124.24   18.91
  -4   5  -9  145.26   20.30
   4   5 -10   75.43   34.15
  -4   5 -10  150.22   34.68
  -4  -5  10   92.17   33.43
   4   5 -10  147.41   33.99
  -4   5 -10  141.04   34.76
   4   5 -11  178.18   68.84
  -4  -5  11  198.77   68.25
  -4   5 -11  320.04   69.11
  -4   5 -11  324.18   69.44
   4   5 -11  265.55   68.55
   4   5 -12   96.60   39.67
  -4   5 -12  153.55   39.32
  -4   5 -12  181.21   40.42
   4   5 -12  146.53   39.01
  -4   5 -13  122.83   32.15
   4   5 -13   80.76   31.81
  -4   5 -13  130.95   31.36
   4   5 -13  103.98   30.84
  -4   5 -14   72.85   25.47
   4   5 -14  100.32   24.44
  -4   5 -14   70.36   24.47
  -4   5 -15  102.39   30.77
   4   5 -15  109.91   29.90
  -4   5 -15  100.01   29.68
  -4   5 -16   47.03   19.21
   4   5 -16   47.23   17.69
  -4   5 -16   41.25   17.01
  -4   5 -17   55.01   21.07
   4   5 -17   45.61   18.73
  -5  -5 -17   -1.07   14.41
   5   5  17  -10.16   16.08
  -5   5  17    9.17   11.81
  -5  -5 -16   18.64   17.61
  -5   5  16   28.96   15.15
   5   5  16   46.94   18.05
  -5   5  16   48.25   15.55
   5   5  15   64.85   18.07
  -5   5  15   19.13   15.14
  -5   5  15   31.21   15.47
  -5  -5 -15   44.96   17.54
   5   5  14   92.14   23.68
  -5   5  14   82.92   21.95
  -5   5  14   19.02   21.33
  -5  -5 -14   97.30   24.00
   5   5  13  108.29   26.22
  -5   5  13   90.12   24.72
  -5   5  13   41.02   24.73
  -5  -5 -13  104.82   26.71
  -5  -5 -12  339.09   60.37
   5   5  12  238.27   59.33
  -5   5  12  162.05   58.70
  -5   5  12  189.09   58.45
  -5   5  11   27.31   14.93
  -5   5  11   29.93   16.14
   5   5  11   64.49   17.00
  -5  -5 -11   72.00   18.24
   5   5  10  341.73   77.84
  -5   5  10  243.26   77.47
  -5   5  10  244.31   77.00
   5   5  10  311.50   78.36
  -5  -5 -10  394.95   78.55
  -5   5   9   81.41   23.24
   5   5   9  106.44   24.43
   5   5   9  102.38   25.92
  -5   5   9   74.61   23.40
  -5   5   9   64.11   24.36
   5  -5  -8  118.97   34.33
  -5   5   8  106.60   34.62
   5   5   8  155.41   35.64
  -5   5   8  150.36   35.89
  -5   5   8  115.63   34.29
   5   5   8  165.90   36.73
  -5   5   8  141.66   34.67
   5   5   7   73.62   18.33
   5   5   7   70.44   16.37
  -5   5   7   54.87   15.26
   5  -5  -7   48.27   14.83
   5   5   7   70.04   16.76
  -5   5   7   49.51   15.32
  -5   5   7    8.54   16.60
  -5   5   7   39.19   14.72
  -5  -5  -7   75.22   18.32
   5  -5  -6  139.38   42.80
  -5   5   6  148.29   43.04
  -5  -5  -6  257.23   44.93
   5   5   6  208.93   43.66
   5   5   6  199.73   43.82
  -5   5   6  108.07   42.99
  -5   5   6  151.41   44.22
   5   5   6  202.08   44.93
  -5  -5  -5  142.58   25.93
   5  -5  -5   62.87   23.06
   5   5   5  103.36   24.21
  -5   5   5   86.93   25.06
  -5   5   5   66.15   23.40
   5   5   5  108.06   24.07
   5  -5  -4   13.41    5.94
   5  -5  -4    4.83    6.54
   5   5   4    5.26    7.72
  -5   5   4   -0.64    9.40
  -5  -5  -4   30.22   10.38
  -5   5   4   12.21    6.31
   5   5   4   10.96    7.16
   5   5   3   10.22    6.59
   5  -5  -3   -0.56    5.98
  -5  -5  -3    8.99    9.43
  -5   5   3    4.45    9.10
  -5   5   3    5.25    6.00
   5   5   3    0.32    6.21
   5  -5  -3    2.71    5.54
   5  -5  -2   66.72   21.49
   5   5   2   75.81   21.67
  -5  -5  -2  114.60   23.25
   5  -5  -2   63.60   21.33
  -5   5   2  101.59   23.32
   5   5   2   93.57   21.61
  -5   5   2   68.52   21.45
   5  -5  -1   12.82    7.37
   5  -5  -1   13.46    7.31
  -5  -5  -1   36.25   10.56
   5   5   1    3.11    7.11
  -5   5   1   21.37    7.49
   5   5   1   32.27    9.84
  -5  -5   0   47.60   14.69
   5  -5   0   43.77   14.78
  -5  -5   0   83.04   16.72
   5  -5   0   41.60   14.94
   5   5   0   39.49   14.55
  -5   5   0   54.90   15.00
   5   5   0   79.83   16.27
  -5  -5   1   87.82   25.56
   5   5  -1   84.29   25.49
   5   5  -1  123.25   26.53
   5  -5   1   69.08   25.74
  -5   5  -1   98.17   25.99
  -5  -5   1  119.58   26.66
   5  -5   1  113.11   26.25
  -5  -5   2  158.73   53.61
   5  -5   2  141.99   53.84
  -5   5  -2  266.22   55.22
   5   5  -2  252.26   54.36
   5   5  -2  165.84   53.61
  -5   5  -2  230.41   54.08
   5   5  -2  216.69   54.97
   5  -5   2  229.51   54.24
  -5  -5   2  286.79   54.62
   5   5  -3  299.93   62.57
   5   5  -3  208.37   61.94
  -5  -5   3  160.05   61.90
   5  -5   3  190.54   62.23
  -5   5  -3  302.74   63.50
  -5  -5   3  310.07   62.74
  -5   5  -3  282.45   62.56
   5   5  -3  244.50   63.13
   5   5  -4  440.36  130.18
  -5  -5   4  350.26  129.24
   5   5  -4  623.34  129.77
  -5   5  -4  633.14  130.59
   5  -5   4  415.04  129.63
   5   5  -4  436.35  129.31
  -5   5  -4  603.04  129.93
  -5  -5   4  654.43  129.86
   5   5  -5   51.65   21.10
  -5  -5   5   37.77   19.03
  -5  -5   5  101.86   20.06
   5   5  -5   71.32   19.32
   5  -5   5   57.58   19.94
   5   5  -5   67.22   19.61
  -5   5  -5   86.16   21.68
  -5   5  -5   80.38   20.55
  -5  -5   6  201.48   84.91
   5   5  -6  374.21   85.23
   5  -5   6  319.36   85.62
  -5   5  -6  390.11   86.41
   5   5  -6  316.48   85.09
  -5   5  -6  397.01   85.86
   5   5  -6  214.96   85.77
  -5  -5   6  418.47   85.37
   5   5  -7   40.35   18.50
   5   5  -7   64.52   16.31
   5   5  -7   50.98   16.53
  -5  -5   7   77.99   16.59
  -5  -5   7   24.86   16.10
  -5   5  -7   66.95   18.99
  -5   5  -7   65.72   18.26
  -5  -5   8  119.64   28.24
   5   5  -8   79.86   29.98
  -5  -5   8   68.36   28.31
   5   5  -8  108.08   28.64
  -5   5  -8  132.68   29.90
  -5   5  -8  111.83   30.26
  -5   5  -9   79.11   20.06
   5   5  -9   54.42   18.06
   5   5  -9   35.57   19.62
  -5  -5   9   65.58   16.93
  -5   5  -9   68.87   19.88
  -5   5 -10   91.18   23.05
   5   5 -10   67.10   21.49
  -5   5 -10   90.75   23.13
   5   5 -10   51.86   23.34
  -5   5 -11    8.03   11.17
   5   5 -11    6.59    9.04
  -5   5 -11    8.22   11.65
   5   5 -11    6.86   11.47
   5   5 -12    6.68    9.25
  -5   5 -12   16.03   11.53
   5   5 -12   -1.79   12.58
  -5   5 -12    7.81   11.64
  -5   5 -13    1.67   12.63
   5   5 -13   31.81   10.90
   5   5 -13   14.03   13.85
  -5   5 -13    7.80   12.02
   5   5 -14    4.23   10.61
  -5   5 -14   10.66   13.40
   5   5 -14    0.98   13.67
  -5   5 -14   -3.19   11.79
  -5   5 -15   22.67   15.21
  -5   5 -15    8.12   12.88
  -5   5 -16   32.04   18.80
  -5   5 -16   47.18   17.49
   6   5  15   93.95   21.31
  -6   5  15   36.91   18.68
  -6  -5 -15   30.83   21.18
   6   5  14   10.27   13.34
  -6   5  14   -1.59   12.15
  -6  -5 -14  -20.24   15.57
   6   5  14   18.09   16.45
   6   5  13   24.02   14.40
  -6   5  13    3.94   13.19
  -6  -5 -13   24.72   16.02
   6   5  13   44.04   17.54
   6   5  12    9.71   12.01
  -6   5  12    4.69   11.88
  -6  -5 -12   -1.99   14.60
   6   5  12   11.84   14.16
   6   5  11    6.94   11.28
  -6   5  11    8.51   11.52
  -6  -5 -11   14.39   14.09
   6   5  11  -13.32   14.16
  -6   5  10   -1.53   11.25
   6   5  10   -1.93   10.70
   6   5  10  -32.14   14.46
   6   5   9   11.85   10.59
  -6   5   9    5.82    7.88
  -6   5   9   15.21   11.70
   6   5   9   25.76   14.50
   6  -5  -8   36.82   11.64
   6   5   8   42.97   13.22
  -6   5   8   17.30   11.04
  -6   5   8   18.87   14.01
  -6  -5  -8   60.86   16.37
   6  -5  -7   71.01   21.66
   6   5   7   88.46   22.91
  -6   5   7   41.89   21.31
  -6   5   7   97.52   24.41
  -6  -5  -7  142.64   25.29
   6  -5  -6   43.81   13.83
   6   5   6   65.86   15.23
  -6  -5  -6   77.68   17.89
  -6   5   6   22.14   13.43
  -6   5   6   44.01   16.78
   6  -5  -5  214.59   58.50
   6   5   5  258.11   58.89
  -6   5   5  299.60   60.22
  -6   5   5  132.62   58.17
  -6  -5  -5  360.77   60.56
   6  -5  -4    9.20    7.03
   6   5   4   13.87    7.79
  -6  -5  -4   13.88   11.54
  -6   5   4   11.87   11.39
  -6   5   4    5.18    6.40
   6   5   3  156.63   47.63
  -6   5   3  257.28   49.65
  -6   5   3  144.18   47.31
  -6  -5  -3  301.31   49.62
   6  -5  -3  156.97   47.63
   6  -5  -2   36.27   11.34
  -6  -5  -2   62.41   14.68
   6   5   2   25.88   10.75
  -6   5   2   59.40   15.02
  -6   5   2   14.82   10.66
  -6   5   1  190.72   42.24
   6   5   1  110.73   39.80
  -6   5   1  130.63   39.96
   6  -5  -1  162.74   40.46
   6   5   1  170.50   42.06
  -6  -5  -1  246.55   42.03
   6   5   0   32.21   15.26
  -6  -5   0   68.10   14.80
   6  -5   0   31.93   12.69
   6   5   0   27.54   11.24
  -6   5   0   43.36   12.16
   6  -5   1  108.15   38.44
   6   5  -1  117.39   38.05
  -6   5  -1  158.51   38.66
   6  -5   1  164.90   39.12
   6   5  -1  170.28   40.50
  -6  -5   1  226.43   40.09
   6   5  -2   13.59   11.18
  -6  -5   2   15.59    9.99
   6  -5   2    4.71    7.22
   6   5  -2    7.02    4.85
  -6   5  -2   10.65    7.47
   6  -5   2   14.78    8.66
   6   5  -3   61.80   21.15
  -6  -5   3   81.41   20.35
   6  -5   3   74.95   20.11
   6  -5   3   39.97   18.99
   6   5  -3  103.09   20.13
  -6   5  -3  110.74   22.24
   6   5  -3   45.22   18.02
  -6   5  -3   95.27   19.52
   6   5  -4   12.40   11.19
  -6  -5   4   37.98    9.86
   6  -5   4   14.78    8.22
   6   5  -4   28.77    8.95
  -6   5  -4   17.13   11.93
   6   5  -4    2.59    5.51
  -6   5  -4   14.06    8.73
   6   5  -5   18.95   10.94
  -6  -5   5   -0.94    8.25
  -6   5  -5    6.98    8.19
  -6   5  -5   -2.37   11.10
   6   5  -5   -2.60    4.46
  -6   5  -6   17.25    8.68
   6   5  -6   -4.85   10.97
  -6  -5   6    3.08    8.20
  -6   5  -6    6.41   11.24
  -6   5  -7   53.47   15.68
   6   5  -7   33.15   16.69
  -6  -5   7   53.36   14.44
  -6   5  -7   30.94   16.63
   6   5  -8    5.12   11.81
  -6  -5   8    4.09    7.71
  -6   5  -8   14.32   10.49
   6   5  -9   79.16   32.60
  -6   5  -9  139.84   32.28
  -6   5 -10  -11.79   11.61
   6   5 -10    3.64   12.38
  -6   5 -10   12.03   12.26
  -6   5 -11  161.48   40.09
   6   5 -11   90.33   40.17
  -6   5 -11  173.40   40.77
  -6   5 -12   11.60   14.49
   6   5 -12   22.43   15.44
  -6   5 -12   36.62   14.88
  -6   5 -13  133.32   31.80
   6   5 -13   69.79   31.53
  -6   5 -13  110.03   31.75
  -6   5 -14    0.90   14.06
  -6   5 -14    6.48   14.03
   7   5  12  110.28   32.73
  -7   5  12   70.02   32.65
  -7  -5 -12  139.27   34.86
   7   5  12  149.95   35.42
   7   5  11   12.44   12.12
  -7   5  11   -7.75   12.76
   7   5  10  153.64   37.90
  -7   5  10  120.12   38.45
  -7   5   9    2.57   12.50
  -7  -5  -9   -2.00   14.63
  -7  -5  -8  163.63   32.66
  -7   5   8   56.35   30.70
  -7  -5  -7    3.74   12.95
  -7   5   7    5.11   12.01
  -7  -5  -6   37.92   15.75
  -7   5   6   25.54   14.66
   7  -5  -5   -2.19    7.97
  -7  -5  -5   20.05   13.21
  -7   5   5    1.70   12.05
   7   5   5   19.21   13.77
   7  -5  -4   13.80   10.19
  -7  -5  -4   28.57   13.97
  -7   5   4   35.81   14.49
   7   5   4   27.85   14.37
   7   5   3    1.77   11.96
   7  -5  -3    6.39    7.75
  -7  -5  -3   -3.24   11.54
  -7   5   3   -2.56   11.82
   7   5   2    3.50   12.03
   7  -5  -2   -0.47    8.27
  -7  -5  -2   -0.78   11.74
  -7   5   2   24.89   12.25
   7  -5  -1   -0.49    8.24
   7   5   1    0.87   12.50
  -7  -5  -1  -18.02   11.77
  -7   5   1   -8.63   12.00
  -7  -5   0  188.41   40.13
  -7   5   0  168.52   40.70
   7   5   0  126.47   40.41
   7  -5   0  106.16   38.78
   7  -5   1  -10.24    9.32
   7   5  -1   -0.87   11.72
  -7  -5   1   -4.16   10.60
   7   5  -2  146.89   39.89
   7  -5   2  118.59   38.54
  -7   5  -2  121.08   37.61
  -7  -5   2  203.84   39.38
  -7   5  -3   -0.74    7.58
   7   5  -3    9.63   12.46
  -7  -5   3    2.54   10.40
   7  -5   3    9.58    9.60
   7   5  -4  104.44   39.60
  -7   5  -4  178.25   40.25
  -7   5  -4  140.53   38.02
   7  -5   4  113.31   38.73
  -7  -5   4  172.02   38.97
   7   5  -5   -8.08   13.04
  -7  -5   5   32.82   10.85
  -7   5  -5   -5.00    9.03
  -7   5  -5   14.67   12.37
   7  -5   5    8.70   10.85
   7   5  -6  152.49   44.02
  -7   5  -6  182.32   44.49
  -7  -5   6  158.98   42.64
  -7   5  -6  148.56   42.46
   7  -5   6  165.03   43.37
  -7   5  -7   -3.83   10.35
   7   5  -7   -5.59   13.32
  -7  -5   7    2.05    9.36
  -7   5  -7  -17.00   13.69
  -7   5  -8  188.96   47.24
   7   5  -8  112.44   46.37
  -7   5  -8  193.60   45.72
  -7   5  -9    7.80   13.83
  -7   5  -9    0.65   10.93
   7   5  -9    8.79   13.21
  -7   5 -10   41.06   17.32
  -7   5 -10   69.43   20.10
   7   5 -10   29.09   19.66
  -7   5 -11    8.97   13.15
  -7   5 -11   23.21   15.47
  -7   5 -12   -3.20   13.23
  -7   5 -12    5.13   14.61
   7   5 -12   -2.13   14.24
  -8  -5  -9   -2.24   15.93
  -8   5   9   -7.66   14.48
   8   5   8    7.73   17.18
  -8  -5  -8    7.60   15.45
  -8   5   8   17.27   13.99
   8   5   7   28.07   20.71
  -8  -5  -7   64.26   20.22
  -8   5   7   44.21   19.02
   8   5   6  -20.10   16.16
  -8  -5  -6    4.08   14.15
  -8   5   6   16.38   13.73
   8   5   5  111.23   37.82
  -8  -5  -5  143.35   37.38
  -8   5   5  128.62   37.16
   8   5   4  -12.28   16.22
  -8  -5  -4  -10.53   14.09
  -8   5   4   -9.71   13.75
  -8   5   3  183.34   59.41
  -8  -5  -3  283.46   59.82
   8   5   3  194.03   59.86
   8   5   2   11.00   14.44
  -8  -5  -2   12.54   13.79
  -8   5   2  -11.77   14.11
   8   5   1  100.31   33.76
  -8  -5  -1  127.26   33.38
  -8   5   1  112.62   33.93
   8  -5   0   12.14   10.99
  -8  -5   0    9.20   13.79
   8   5   0   32.62   15.11
  -8   5   0   19.92   14.55
   8  -5   1   49.96   18.05
   8   5  -1   61.19   21.29
  -8  -5   1   56.41   20.23
  -8   5  -1   56.25   20.66
   8   5  -2   -8.90   14.39
  -8  -5   2   -6.99   12.63
   8  -5   2   14.54   10.99
   8  -5   3   31.11   15.47
   8   5  -3   38.74   18.50
  -8  -5   3   54.45   16.53
   8   5  -4    4.00   13.42
   8  -5   4   -9.42   11.92
  -8  -5   4    6.44   11.04
   8  -5   5    0.76   11.67
   8   5  -5   11.13   13.55
  -8  -5   5    2.05   11.20
  -8   5  -5    7.36   14.39
  -8   5  -6   -3.20   14.98
   8   5  -6    5.12   14.17
   8  -5   6    2.39   11.79
  -8   5  -7   55.07   18.57
   8  -5   7   14.23   15.63
  -8   5  -8  -19.72   15.77
   8   5  -8   -5.29   15.34
   8  -5   8    7.03   13.58
   0  -6 -20   80.96   31.72
   0   6  20  149.95   35.07
   0  -6 -19    4.25   11.14
   0   6  19   -7.36   15.37
   0  -6 -18   83.72   26.19
   0   6  18   95.49   28.62
   0  -6 -17  -11.85   11.26
   0   6  17  -10.33   14.49
   0  -6 -16   67.49   25.39
   0   6  16  114.11   27.53
   0  -6 -15  -13.80   10.10
   0   6  15    1.66   11.91
   0   6  14  138.12   31.72
   0  -6 -14   86.85   30.16
   0   6  13   23.40   12.08
   0  -6 -13    8.62    9.66
   0   6  12   32.16   14.40
   0  -6 -12   37.89   13.05
   0   6  11   -5.75   10.43
   0  -6 -11    3.60    7.77
   0   6  10    2.39    8.76
   0  -6 -10   -5.70    7.65
   0   6   9    3.46    7.43
   0   6   9   -3.55    8.11
   0  -6  -9   -9.71    7.70
   0   6   8  419.02   82.99
   0   6   8  278.08   82.59
   0  -6  -8  298.39   82.62
   0   6   7   -1.33    6.43
   0  -6  -7    4.01    6.79
   0  -6  -7   -5.29    6.60
   0  -6  -6  741.43  183.26
   0  -6  -6  706.55  183.16
   0  -6  -5   -2.76    6.28
   0   6   5   -3.57    4.55
   0   6   4 1186.91  417.82
   0   6   4 1856.14  417.68
   0   6   3   -0.34    3.60
   0  -6  -3    0.37    5.05
   0   6   3    1.75    5.16
   0   6   2  518.52  158.06
   0  -6  -2  689.17  158.25
   0  -6  -2  575.14  157.84
   0   6   2  669.72  157.88
   0  -6  -1    4.83    3.70
   0   6   1   -2.03    3.66
   0  -6  -1   -3.89    5.05
   0   6   1    0.92    4.69
   0   6   0  391.06   98.49
   0  -6   0  454.21   98.75
   0   6   0  353.34   98.59
   0  -6   0  350.93   98.44
   0  -6   1    0.45    3.98
   0   6  -1   -3.02    4.37
   0   6  -1   -2.13    4.27
   0  -6   1    7.28    4.55
   0  -6   2  218.98   60.34
   0   6  -2  256.26   60.43
   0  -6   2  204.95   60.34
   0   6  -2  294.35   60.83
   0   6  -2  218.19   60.31
   0  -6   3    4.55    4.67
   0  -6   3    0.24    4.07
   0   6  -3   -1.20    5.16
   0   6  -3   -3.13    5.71
   0   6  -3    3.69    4.02
   0   6  -4  298.05   81.49
   0   6  -4  366.33   81.32
   0   6  -4  410.40   81.91
   0  -6   4  268.16   81.39
   0   6  -4  254.80   81.16
   0  -6   5   10.64    5.58
   0   6  -5    2.19    3.62
   0   6  -5    0.83    3.98
   0  -6   5    0.81    6.36
   0   6  -5   -6.58    6.21
   0  -6   6  199.08   55.71
   0   6  -6  241.31   55.26
   0  -6   6  176.65   55.87
   0   6  -6  257.32   56.12
   0   6  -6  184.05   55.13
   0  -6   7    0.86    6.54
   0   6  -7   -3.63    3.65
   0  -6   7    5.07    7.28
   0   6  -7    1.43    3.86
   0   6  -7   -3.01    7.28
   0  -6   8  481.47  130.88
   0   6  -8  527.94  130.30
   0  -6   8  503.67  131.05
   0   6  -8  445.98  130.23
   0   6  -8  697.57  131.42
   0   6  -9    0.31    3.55
   0   6  -9   -0.60    3.21
   0   6 -10  194.96   61.59
   0   6 -10  393.99   63.68
   0   6 -10  257.78   61.67
   0   6 -11   -4.00    3.27
   0   6 -11   -2.09    2.88
   0   6 -11   -1.98    9.65
   0   6 -12  146.48   55.11
   0   6 -12  247.11   55.23
   0   6 -13   -1.27    2.36
   0   6 -13    3.78   11.09
   0   6 -14  378.57   98.14
   0   6 -15   -1.72   12.71
   0   6 -16  208.65   56.17
   0   6 -17    9.67   14.14
   0   6 -18   42.96   19.37
   0   6 -19   12.97   15.14
  -1   6  19   17.46   14.80
   1  -6 -19   -6.59   11.08
  -1  -6 -19    2.68   11.94
  -1   6  18    2.91   14.02
   1  -6 -18    5.57   10.81
  -1  -6 -18    2.58   11.41
  -1   6  17   18.32   13.90
   1  -6 -17   -4.61    9.99
  -1  -6 -17  -14.89   11.88
  -1   6  16   13.80   13.36
   1  -6 -16   -2.22    9.77
  -1  -6 -16   12.70   11.06
   1  -6 -15   71.03   26.23
  -1  -6 -15   99.55   26.89
  -1   6  15  112.76   27.87
   1  -6 -14   21.80   15.81
  -1  -6 -14   55.20   17.10
  -1   6  14   73.82   18.14
  -1   6  13  280.98   63.74
  -1  -6 -13  276.96   63.51
   1  -6 -13  179.24   62.80
   1  -6 -12   55.45   25.30
  -1   6  12  108.07   26.61
  -1  -6 -12  110.71   26.02
  -1   6  11  464.32   98.04
  -1  -6 -11  378.53   97.65
   1  -6 -11  304.46   97.40
   1   6  10   50.16   13.96
   1  -6 -10   22.67   12.15
  -1   6  10   33.74   13.23
  -1  -6 -10   36.78   12.98
  -1   6   9  660.51  150.72
   1   6   9  531.69  150.49
   1   6   9  689.40  150.86
  -1   6   9  726.08  150.84
  -1   6   9  388.60  150.27
  -1  -6  -9  594.06  150.64
   1  -6  -9  487.18  150.42
   1   6   8   16.54    7.91
  -1   6   8   11.64    7.92
  -1   6   8    6.58    7.99
  -1   6   8   -2.83    6.86
   1   6   8    3.19    8.22
   1  -6  -8   20.01    7.70
  -1  -6  -8    6.35    7.63
   1   6   8   -0.97    7.60
   1  -6  -7  180.54   53.51
   1   6   7  250.10   53.87
  -1   6   7  224.90   53.70
  -1   6   7  160.16   53.31
  -1  -6  -7  225.55   53.64
   1  -6  -7  172.51   53.37
  -1  -6  -6   50.41   15.72
   1  -6  -6   48.14   15.48
   1   6   6   73.97   15.88
  -1   6   6   51.50   15.87
   1  -6  -6   42.09   15.37
  -1   6   6   35.47   15.13
   1   6   6   58.28   15.13
  -1   6   5  102.06   20.49
   1   6   5   84.34   20.33
  -1  -6  -5   85.58   20.45
   1   6   5  111.69   20.73
   1  -6  -5   64.57   20.25
  -1   6   5   56.58   18.95
   1   6   5   81.97   19.94
   1   6   4   92.12   16.20
  -1   6   4   79.82   15.91
  -1  -6  -4   66.06   15.94
   1  -6  -4   65.57   15.80
  -1  -6  -4   73.38   15.84
   1   6   4   79.30   15.40
  -1   6   4   41.88   13.98
   1   6   4   58.85   15.57
   1   6   3    0.35    5.29
   1   6   3   -1.35    5.24
  -1   6   3    1.00    1.36
  -1  -6  -3   -1.45    6.08
   1   6   3    3.48    5.77
  -1   6   3    6.10    6.36
  -1  -6  -3   -6.06    5.73
  -1   6   3   -7.74    5.58
   1  -6  -3   -0.71    5.40
  -1   6   2    2.11    5.56
   1   6   2   16.79    5.86
   1   6   2    7.21    5.23
  -1   6   2    5.92    2.66
   1  -6  -2    1.13    5.89
  -1  -6  -2    4.17    6.01
   1  -6  -2    5.20    6.01
   1   6   2   23.75    6.69
  -1   6   2   10.00    5.88
  -1  -6  -2    7.35    5.67
  -1  -6  -2   10.95    5.20
   1  -6  -1  172.77   62.02
  -1  -6  -1  224.57   62.18
   1  -6  -1  232.45   62.17
   1   6   1  229.01   62.04
   1   6   1  325.60   62.40
  -1   6   1  309.38   62.37
   1  -6  -1  200.72   61.56
  -1  -6  -1  306.05   62.25
   1   6   1  287.88   62.09
  -1   6   1  233.23   62.09
  -1  -6  -1  213.19   61.91
  -1  -6   0    8.38    5.90
   1  -6   0   16.40    4.58
   1   6   0   15.08    6.39
  -1   6   0    8.01    5.89
  -1  -6   0   13.40    6.52
   1  -6   0    4.46    6.41
   1   6   0   20.70    6.73
  -1   6   0   16.12    6.81
   1  -6   0    0.68    5.73
   1   6   0    7.82    5.56
  -1  -6   0   16.49    6.12
  -1   6  -1 1202.50  277.06
   1   6  -1 1090.41  277.01
   1  -6   1 1017.71  276.76
  -1  -6   1 1018.36  277.07
   1   6  -1  873.48  276.84
   1  -6   1  935.18  277.06
   1   6  -1 1283.61  277.20
  -1   6  -1 1301.61  277.27
  -1  -6   1 1215.04  276.99
  -1  -6   1  986.40  276.95
  -1  -6   2    8.62    5.43
  -1  -6   2    7.19    4.15
   1   6  -2   -0.69    4.10
   1   6  -2    2.61    5.46
   1  -6   2    0.65    4.18
  -1   6  -2    0.62    4.88
  -1  -6   2    7.22    5.73
   1  -6   2    0.36    5.76
   1   6  -2    4.03    5.76
  -1   6  -2    8.88    6.26
  -1   6  -2   -2.66    4.78
   1   6  -3  834.49  204.77
  -1   6  -3  831.61  204.63
  -1   6  -3 1081.68  204.82
   1   6  -3  549.35  204.36
  -1  -6   3  696.82  204.72
   1  -6   3  806.22  204.85
   1   6  -3  966.91  204.94
   1  -6   3  793.63  204.57
  -1  -6   3  695.28  204.66
  -1  -6   3  848.78  204.49
   1   6  -4   13.39    5.71
  -1  -6   4   20.93    7.16
   1  -6   4   19.86    6.93
  -1   6  -4   -1.11    6.22
  -1   6  -4   19.55    6.71
  -1  -6   4   29.81    7.75
   1  -6   4   18.24    7.89
   1   6  -4   30.36    7.75
   1   6  -4   17.75    7.53
  -1  -6   4   11.80    5.66
  -1   6  -5  469.68  127.83
   1   6  -5  411.25  127.54
  -1   6  -5  780.98  128.14
  -1  -6   5  264.54  127.51
  -1  -6   5  545.30  128.23
   1  -6   5  571.31  128.33
  -1  -6   5  532.04  128.13
   1   6  -5  809.35  128.58
   1   6  -5  611.18  128.31
   1  -6   5  609.08  128.10
  -1  -6   6   42.00   12.04
  -1   6  -6    6.92   10.51
   1  -6   6   53.99   11.83
   1   6  -6   46.77   12.17
   1   6  -6   40.81    9.91
  -1   6  -6   55.33   11.14
  -1  -6   6   35.52   11.84
   1  -6   6   39.30   12.16
   1   6  -6   47.84   12.33
   1   6  -6   25.26    9.76
   1  -6   7  339.40   56.58
   1   6  -7  294.10   56.65
   1   6  -7  157.05   55.17
   1   6  -7  213.06   55.23
  -1   6  -7  106.91   55.53
  -1   6  -7  410.21   56.17
  -1  -6   7  282.79   56.66
   1  -6   7  354.56   56.88
   1   6  -7  409.00   56.99
  -1  -6   7  290.31   56.57
  -1  -6   8    0.99    7.25
   1  -6   8   -2.76    7.18
  -1  -6   8   -8.08    7.45
  -1   6  -8   -0.27    5.38
   1   6  -8   -4.14    8.00
   1  -6   9  194.14   56.59
  -1  -6   9  169.59   56.61
  -1   6  -9  218.45   56.08
   1   6  -9  257.33   57.03
  -1   6 -10   21.48    7.86
   1  -6  10   18.95    7.70
   1   6 -10   21.47   10.87
  -1   6 -11   43.48   11.78
   1  -6  11   35.77   11.61
   1   6 -11   33.24   14.31
   1  -6  12   30.69   10.68
  -1   6 -12   37.37   10.88
   1   6 -12   32.85   13.98
  -1   6 -13   30.02   12.50
   1   6 -13   73.18   16.59
  -1   6 -14   77.63   21.27
  -1   6 -14   78.91   24.53
   1   6 -14   81.19   24.03
  -1   6 -15   55.65   21.27
   1   6 -15   62.38   20.75
  -1   6 -16    4.69   14.24
   1   6 -16   29.18   14.14
  -1   6 -17  165.89   39.80
   1   6 -17  114.50   39.33
  -1   6 -18    7.36   14.88
   1   6 -18  -10.93   14.83
  -1   6 -19  108.71   34.39
   1   6 -19  114.48   34.04
   2   6  19   16.49   16.61
  -2   6  19   13.00   15.92
   2  -6 -19   -0.81   11.62
  -2  -6 -19   27.47   14.26
   2   6  18  121.80   30.18
  -2   6  18  113.50   29.27
  -2  -6 -18  143.43   29.08
   2  -6 -17    0.76   11.70
   2   6  17   54.08   17.08
  -2  -6 -17   29.88   14.60
  -2   6  17   27.65   15.62
   2   6  16  211.35   46.30
  -2   6  16  214.25   45.85
  -2  -6 -16  214.32   45.64
   2  -6 -15  -12.10    9.54
   2   6  15    6.11   13.33
  -2   6  15   -1.58   11.85
  -2  -6 -15    5.66   11.21
   2  -6 -14   17.13   14.58
   2   6  14   53.29   17.58
  -2   6  14   60.03   17.21
  -2  -6 -14   53.38   16.65
   2  -6 -13    3.96    8.55
  -2   6  13   -0.38    6.12
   2   6  13   14.61   11.62
  -2   6  13   11.11   11.14
  -2  -6 -13   -8.86   10.90
   2  -6 -12    5.07   11.95
  -2   6  12   14.66   10.31
  -2   6  12   50.68   14.46
  -2  -6 -12   50.66   13.83
   2   6  12   48.23   14.96
   2  -6 -11   10.35   12.39
  -2   6  11   27.32   11.25
   2   6  11   61.89   15.24
  -2  -6 -11   52.21   14.39
  -2   6  11   48.56   14.63
   2  -6 -10   15.77    7.55
  -2   6  10   -2.23    4.63
  -2  -6 -10  -12.71    9.51
   2   6  10    1.26    9.65
  -2   6  10    7.94    9.49
  -2   6   9    5.52    4.11
  -2   6   9   -0.97    7.73
   2  -6  -9    1.68    7.44
  -2  -6  -9    0.60    8.56
   2   6   9    2.92    8.64
  -2   6   9   -4.76    8.60
   2   6   8  141.01   28.07
  -2   6   8   76.69   26.29
  -2   6   8  131.35   27.90
   2   6   8  155.28   28.44
  -2   6   8  116.74   27.90
  -2  -6  -8  140.50   28.36
   2  -6  -8   37.63   27.15
  -2   6   8  103.38   27.62
  -2   6   7   79.41   25.57
   2   6   7  141.32   27.55
   2  -6  -7  117.48   27.07
   2   6   7  166.95   27.91
  -2   6   7  145.46   27.37
  -2   6   7   99.40   26.87
   2   6   7  146.24   27.42
   2  -6  -6  249.97   67.17
   2   6   6  337.17   67.60
  -2   6   6  307.12   67.43
   2   6   6  321.53   67.49
  -2   6   6  217.35   67.12
   2  -6  -6   68.84   66.75
   2   6   6  333.66   67.39
   2   6   5   55.16   14.40
  -2   6   5   45.21   13.94
   2  -6  -5    7.14   13.61
  -2  -6  -5   63.34   14.55
  -2  -6  -5   44.24   14.09
   2  -6  -5   36.47   13.94
   2   6   5   68.03   14.54
  -2   6   5   46.15   14.03
   2   6   5   51.48   14.26
   2   6   4  316.40   82.66
  -2  -6  -4  286.67   82.65
   2  -6  -4  232.21   82.46
   2   6   4  355.98   82.79
  -2   6   4  306.62   82.64
  -2  -6  -4  365.16   82.79
   2   6   4  355.50   82.73
   2   6   3   23.51    8.22
  -2  -6  -3   13.15    8.57
  -2  -6  -3   19.74    8.42
   2  -6  -3   18.82    8.14
   2   6   3   25.44    8.65
  -2   6   3   20.49    8.20
   2   6   3   26.78    8.59
  -2  -6  -2  700.93  219.15
  -2   6   2  860.34  219.33
  -2  -6  -2 1080.68  219.46
   2   6   2  907.98  219.30
  -2  -6  -2  704.77  219.19
   2  -6  -2  651.19  219.15
   2   6   2  976.61  219.38
  -2   6   2  818.40  219.26
   2   6   2  978.48  219.37
   2  -6  -1   50.49   23.24
   2   6   1  144.52   24.65
  -2   6   1   91.62   24.54
  -2   6   1  155.55   24.94
  -2  -6  -1  124.84   24.70
   2  -6  -1  103.82   24.59
   2   6   1  166.87   24.94
  -2   6   1  131.02   24.73
  -2  -6  -1  174.36   24.94
  -2  -6  -1  136.72   24.78
   2   6   1  158.86   24.99
   2   6   0  679.54  153.14
   2  -6   0  518.58  152.68
  -2   6   0  609.50  153.23
  -2   6   0  748.66  153.46
  -2  -6   0  492.23  153.09
   2  -6   0  480.38  153.10
   2   6   0  630.63  153.20
  -2   6   0  614.66  153.24
  -2  -6   0  776.70  153.27
  -2  -6   0  507.70  153.08
   2   6   0  651.20  153.29
   2   6  -1   70.96   16.69
   2  -6   1   68.98   16.16
   2   6  -1   55.08   17.11
  -2   6  -1   81.40   17.35
  -2   6  -1   69.57   17.19
  -2  -6   1   68.00   16.73
  -2  -6   1   35.14   16.71
   2  -6   1   49.36   16.89
   2   6  -1   61.35   16.92
  -2   6  -1   13.58   16.54
  -2  -6   1   63.72   16.89
  -2  -6   2   10.14    7.63
   2   6  -2   18.12    7.97
  -2   6  -2   12.98    7.51
   2  -6   2   19.30    6.63
  -2  -6   2   28.43    7.28
  -2   6  -2   25.85    8.17
  -2  -6   2    8.41    7.43
   2   6  -2   25.68    7.06
   2  -6   2   17.80    7.83
   2   6  -2   10.02    7.57
  -2   6  -2   21.45    8.40
  -2  -6   3   46.98   15.48
   2   6  -3   57.77   15.60
  -2   6  -3   69.25   15.47
  -2  -6   3   57.74   14.72
  -2  -6   3   42.61   15.13
   2  -6   3   49.30   15.50
   2   6  -3   60.57   15.25
  -2   6  -3   65.53   15.65
  -2   6  -3    7.13   14.85
   2   6  -3   53.95   14.57
  -2  -6   4   25.45   13.17
   2   6  -4   47.79   13.75
   2   6  -4   45.75   12.27
  -2   6  -4   -0.35   12.67
  -2  -6   4   36.49   13.20
  -2   6  -4   63.72   13.45
  -2  -6   4   49.06   12.34
   2  -6   4   48.34   13.59
   2   6  -4   41.71   13.31
  -2   6  -4   60.54   13.67
  -2  -6   5   18.15    8.74
  -2  -6   5   17.77    6.42
   2   6  -5   23.47    6.62
   2   6  -5   15.85    9.07
  -2  -6   5   29.30    8.57
  -2   6  -5   22.16    8.38
   2  -6   5   14.78    8.61
   2   6  -5   25.71    8.86
  -2   6  -5   24.94    9.34
   2   6  -6    8.17    3.19
   2   6  -6    6.16    7.18
   2  -6   6   21.52    6.66
  -2  -6   6    9.69    6.87
   2  -6   6    5.55    7.44
  -2   6  -6   -0.38    6.66
  -2  -6   6    5.62    3.02
   2   6  -6   15.20    7.04
  -2  -6   6    0.47    7.18
  -2   6  -6   10.06    7.51
  -2  -6   7   36.10   15.15
   2   6  -7   43.91   15.44
   2  -6   7   50.71   14.67
  -2  -6   7   43.87   15.10
   2  -6   7   59.10   15.54
  -2   6  -7   54.79   14.97
   2   6  -7   50.64   15.31
  -2   6  -7   57.06   15.96
   2   6  -8  191.96   63.52
   2  -6   8  228.39   63.02
  -2  -6   8  201.66   63.28
  -2   6  -8  270.41   63.26
   2   6  -8  267.06   63.56
  -2   6  -8  280.79   63.89
   2  -6   9   70.70   23.29
  -2   6  -9  107.71   23.78
  -2  -6   9   61.87   23.82
   2   6  -9   79.73   24.19
  -2   6  -9   92.00   24.71
   2  -6  10  345.29   93.08
  -2   6 -10  396.98   93.26
   2   6 -10  342.36   93.59
  -2   6 -10  353.58   93.96
  -2   6 -11   74.09   18.83
   2  -6  11   50.14   18.43
   2   6 -11   61.61   19.83
  -2   6 -11   71.35   20.58
   2  -6  12  291.23   76.56
   2   6 -12  276.64   77.32
  -2   6 -12  328.72   77.92
  -2   6 -12  300.13   76.69
   2   6 -13   -7.06   10.79
  -2   6 -13    4.02   11.93
  -2   6 -13   16.06    7.98
  -2   6 -14  153.98   38.59
   2   6 -14  148.66   37.93
  -2   6 -14  121.69   36.22
  -2   6 -15   47.26   17.92
   2   6 -15   34.59   16.40
   2   6 -16   86.39   26.60
   2   6 -17   21.80   15.25
   2   6 -18   -0.96   14.59
   3  -6 -18    2.38   10.98
  -3   6  18   21.08   14.74
   3   6  18    1.06   15.59
  -3  -6 -18   25.48   14.29
  -3   6  17   19.89   14.20
   3   6  17   29.14   16.23
  -3  -6 -17   15.11   13.77
   3  -6 -17   -2.32   10.84
   3   6  16   29.40   15.60
  -3   6  16   26.89   14.78
  -3  -6 -16   27.25   13.96
   3  -6 -16    5.26   11.21
   3   6  15   34.84   15.67
  -3  -6 -15   36.64   14.75
  -3   6  15   20.67   13.92
   3  -6 -15    8.75   11.31
  -3  -6 -14   52.68   18.91
   3   6  14   86.47   20.23
  -3   6  14   96.33   19.52
   3   6  13  181.93   37.79
  -3  -6 -13  229.69   37.93
  -3   6  13  143.43   36.91
  -3  -6 -12   85.63   21.97
   3   6  12  103.26   22.35
  -3   6  12   86.92   21.38
  -3   6  11  175.72   55.43
   3   6  11  346.30   57.65
  -3   6  11  262.10   56.99
  -3  -6 -11  328.17   57.57
  -3   6  10   64.06   21.48
  -3  -6 -10  125.73   24.51
  -3   6  10  112.26   23.85
   3   6  10  121.68   24.39
  -3   6   9  202.01   41.74
   3   6   9  232.15   42.50
  -3   6   9  194.91   42.06
  -3  -6  -9  236.46   42.68
  -3   6   9  131.96   40.42
  -3   6   8   71.70   17.18
   3  -6  -8   19.79   16.78
   3   6   8   94.40   18.26
  -3   6   8   73.16   17.53
  -3   6   8   45.63   15.01
   3   6   8   77.52   18.02
   3   6   7  420.73   62.65
   3  -6  -7  320.21   62.07
  -3   6   7  340.73   62.33
   3   6   7  401.61   62.62
   3   6   7  459.34   62.97
   3   6   6   56.13   15.03
  -3  -6  -6   45.98   14.92
   3   6   6   45.07   14.10
   3  -6  -6   40.11   13.86
  -3   6   6   30.05   13.75
  -3   6   6   30.14   14.10
   3   6   6   38.36   14.60
   3   6   6   58.01   14.61
  -3   6   6   52.84   14.14
  -3  -6  -5   82.99   17.19
   3   6   5   81.70   17.11
   3  -6  -5   40.48   15.97
  -3   6   5   39.97   16.40
   3   6   5   61.98   16.72
   3   6   5   54.50   16.41
  -3   6   5   42.92   16.10
  -3   6   5   37.56   15.96
   3   6   4   -4.30    6.76
  -3  -6  -4   -3.97    6.75
  -3  -6  -4   -2.75    6.46
   3  -6  -4   -3.27    6.18
   3   6   4   17.83    6.93
   3   6   4    0.84    6.56
  -3   6   4   -7.77    6.06
  -3   6   4   -0.48    6.32
   3   6   3   37.94   13.20
   3   6   3   39.57   12.87
  -3  -6  -3   32.55   12.64
   3  -6  -3   30.43   12.44
  -3   6   3   35.47   12.47
   3   6   3   38.37   12.79
  -3  -6  -3   70.73   13.56
  -3  -6  -2   20.04    9.00
   3  -6  -2   14.66    8.72
   3   6   2   30.36    9.32
   3   6   2   20.57    9.29
  -3   6   2   28.27    9.05
   3   6   2   26.87    9.92
  -3  -6  -2   26.06    9.46
  -3  -6  -2   25.28    9.85
  -3   6   1   98.46   27.63
  -3  -6  -1  128.29   27.72
  -3   6   1  146.53   28.07
  -3  -6  -1  110.10   27.41
   3   6   1  126.10   27.49
  -3   6   1   97.22   27.35
   3  -6  -1   58.71   27.16
   3   6   1  143.44   27.72
   3  -6  -1   80.65   26.42
  -3  -6  -1  102.71   27.65
   3   6   1  132.88   27.97
  -3  -6   0   17.70    9.58
   3   6   0   29.44    9.80
  -3   6   0   -2.66    9.18
   3   6   0   22.02    8.88
  -3  -6   0   27.95    8.88
  -3   6   0   39.99   10.11
   3  -6   0   14.56    8.82
   3   6   0   28.30    8.88
  -3   6   0   21.60    9.11
  -3  -6   0   33.90    9.48
  -3  -6   1   33.83   10.74
   3   6  -1   30.00   10.98
   3   6  -1   36.06   10.08
  -3  -6   1   11.07    9.70
  -3   6  -1   15.39   10.14
  -3   6  -1   43.87   11.05
   3  -6   1   23.04   10.13
   3   6  -1   29.02    9.92
  -3  -6   1   34.82   10.14
  -3   6  -1   37.14   10.35
  -3  -6   2  185.24   48.88
  -3  -6   2  229.78   48.57
  -3   6  -2  276.15   49.27
  -3  -6   2  136.70   48.41
   3  -6   2  139.03   48.56
   3   6  -2  183.42   48.54
  -3   6  -2  201.68   48.81
  -3   6  -2   13.56   48.13
   3   6  -2  220.80   48.50
   3   6  -2  183.07   48.92
   3   6  -3  334.19   95.86
   3  -6   3  385.78   95.87
  -3  -6   3  452.12   95.56
  -3   6  -3  444.97   96.08
  -3  -6   3  255.18   95.46
   3  -6   3  278.22   95.63
   3   6  -3  343.19   95.59
  -3   6  -3  432.07   95.94
   3   6  -3  388.39   95.43
  -3  -6   3  302.26   95.76
   3   6  -4  211.43   53.13
   3  -6   4  214.13   52.94
  -3   6  -4  255.85   53.22
  -3  -6   4  146.07   52.52
  -3  -6   4  225.07   52.36
   3  -6   4  140.50   52.69
   3   6  -4  188.89   52.64
  -3   6  -4  211.00   52.97
   3   6  -4  216.24   52.35
  -3  -6   4  141.40   52.80
   3   6  -5  785.69  219.57
   3  -6   5  849.52  219.48
  -3   6  -5 1055.76  219.72
  -3  -6   5  603.74  219.17
  -3  -6   5  958.45  219.02
   3  -6   5  759.87  219.43
   3   6  -5  819.72  218.96
   3   6  -5  832.66  219.34
  -3   6  -5 1011.00  219.72
  -3  -6   5  706.35  219.46
   3  -6   6  180.12   46.14
  -3   6  -6  208.39   46.46
  -3  -6   6  112.85   45.79
   3   6  -6  171.20   45.23
   3  -6   6  158.29   46.28
  -3  -6   6  172.16   45.22
   3   6  -6  193.55   46.09
  -3   6  -6  215.49   46.60
   3  -6   7  279.85   53.62
   3   6  -7  184.62   52.24
  -3  -6   7  216.43   53.32
  -3   6  -7  348.67   54.05
   3   6  -7  291.75   53.61
  -3   6  -7  315.99   54.24
  -3  -6   7  177.93   52.25
   3  -6   8   33.12   14.48
  -3  -6   8   29.57   14.54
  -3   6  -8   61.85   15.49
   3   6  -8   51.44   15.11
  -3   6  -8   48.32   15.86
   3  -6   9   54.40   20.50
  -3  -6   9   63.75   20.80
   3   6  -9   78.29   21.25
  -3   6  -9   68.32   21.71
  -3   6  -9   87.73   21.22
   3  -6  10   16.88   12.08
  -3   6 -10   36.87   14.27
  -3   6 -10   43.10   12.91
   3   6 -10   35.72   12.98
  -3   6 -11   15.49    9.54
  -3   6 -11   11.67   11.35
   3  -6  11   13.86    9.09
   3   6 -11   16.53   10.35
  -3   6 -12    3.11   11.43
  -3   6 -12   23.15    9.68
   3   6 -12    8.86   10.16
   3   6 -13   -2.71   10.63
  -3   6 -13    4.14   12.44
  -3   6 -13   -3.22    9.17
  -3   6 -14   17.60   13.95
   3   6 -14   18.12   12.16
  -3   6 -14   13.63   10.31
  -3   6 -15   56.97   17.80
  -3   6 -15   34.38   14.27
   3   6 -15   29.38   16.06
   3   6 -16   22.22   14.06
  -3   6 -16   22.76   15.48
  -3   6 -17   90.03   25.77
   3   6 -17   58.58   23.96
   3   6 -18   45.40   19.11
  -3   6 -18   44.21   20.84
  -4  -6 -17   55.18   19.42
   4   6  17   66.60   20.26
  -4   6  17   41.47   17.06
  -4   6  17   21.62   18.13
  -4  -6 -16   19.71   17.04
   4   6  16   46.44   18.06
  -4   6  16   16.39   15.08
  -4   6  16   69.71   17.32
  -4  -6 -15  123.32   29.41
  -4   6  15  117.81   28.37
   4   6  15  117.67   29.49
  -4   6  15   33.57   27.15
  -4  -6 -14   62.03   19.48
   4   6  14   61.78   20.02
  -4   6  14   23.08   17.64
  -4   6  14   72.56   18.72
  -4  -6 -13   38.53   14.57
   4   6  13   40.28   15.16
  -4   6  13   15.99   12.02
  -4   6  13   18.12   13.02
  -4  -6 -12   -0.84   11.22
   4   6  12    9.81   12.04
  -4   6  12   12.76   10.03
  -4   6  12    4.85    9.84
  -4  -6 -11   16.08   11.91
   4   6  11    7.76   10.97
  -4   6  11   14.52   10.52
  -4   6  11    7.36   10.02
  -4   6  10    9.29   10.21
  -4   6  10   22.93   11.26
  -4   6  10   20.63   10.92
   4   6  10   30.95   12.33
   4   6  10   33.77   13.39
  -4  -6 -10   19.22   12.77
  -4   6   9   58.43   17.68
  -4   6   9   80.30   19.26
   4   6   9   81.62   20.54
  -4   6   9   56.01   20.07
  -4   6   9   73.76   19.82
   4   6   9   59.18   20.88
  -4   6   8   42.52   13.69
  -4   6   8   65.59   15.63
   4   6   8   52.52   16.70
  -4   6   8   38.00   16.54
  -4   6   8   59.84   16.04
   4   6   8   71.37   17.73
   4   6   7   48.79   15.41
   4   6   7   67.86   15.77
  -4   6   7   37.17   15.92
  -4   6   7   28.80   14.96
   4   6   7   52.18   17.03
  -4  -6  -7   61.95   16.89
   4   6   6  248.54   57.34
  -4  -6  -6  269.10   57.91
   4  -6  -6  163.12   56.84
  -4   6   6  192.62   57.45
   4   6   6  263.39   57.51
  -4   6   6  168.08   56.98
   4   6   6  254.68   57.90
   4   6   5  233.19   56.06
  -4  -6  -5  283.01   56.80
   4  -6  -5  189.27   55.78
  -4   6   5  211.59   56.44
   4   6   5  236.95   56.15
  -4   6   5  136.01   55.70
   4   6   5  255.20   56.76
   4  -6  -4  177.84   56.93
  -4  -6  -4  383.36   58.91
   4  -6  -4  220.15   57.78
  -4   6   4  298.84   58.73
   4   6   4  279.54   58.12
  -4   6   4  190.28   57.75
   4   6   4  319.92   58.90
   4  -6  -3  223.43   78.04
  -4  -6  -3  505.11   79.71
  -4  -6  -3  333.59   78.86
   4  -6  -3  295.81   78.70
   4   6   3  375.25   78.97
  -4   6   3  290.35   78.76
   4   6   3  422.81   79.71
   4   6   3  449.07   79.42
  -4  -6  -2  240.03   66.93
   4  -6  -2  215.68   66.88
   4   6   2  270.69   67.06
  -4   6   2  223.82   66.93
   4   6   2  355.55   67.54
  -4  -6  -2  431.24   67.88
   4   6   2  336.74   67.79
   4  -6  -2  205.91   66.34
  -4  -6  -1  250.93   46.28
  -4  -6  -1  140.57   45.46
   4  -6  -1  124.60   45.48
   4   6   1  159.11   45.55
  -4   6   1  167.68   45.67
   4   6   1  215.83   46.03
   4  -6  -1  160.39   45.04
   4   6   1  218.97   46.48
  -4  -6   0  264.54   46.49
  -4  -6   0  139.81   45.62
  -4   6   0  222.52   46.81
   4   6   0  144.92   45.69
  -4   6   0  163.41   45.83
   4   6   0  175.56   46.49
   4   6   0  215.24   46.12
   4  -6   0  116.37   45.67
   4  -6   0  169.11   45.38
  -4  -6   1  148.91   30.56
  -4  -6   1   88.27   29.88
  -4   6  -1  143.54   31.17
   4   6  -1  115.79   30.01
  -4   6  -1   97.82   30.19
   4  -6   1   72.61   30.01
   4   6  -1  114.36   30.21
   4   6  -1  116.00   30.84
  -4  -6   2  118.56   24.80
  -4   6  -2  113.82   25.66
  -4  -6   2   55.87   24.08
   4   6  -2   80.43   24.22
  -4   6  -2  101.01   24.73
   4  -6   2   60.41   24.41
   4   6  -2   95.13   24.43
  -4  -6   3   30.47   14.02
   4  -6   3   41.51   14.61
  -4   6  -3   47.05   15.84
   4   6  -3   47.86   14.29
  -4  -6   3   62.40   14.61
  -4   6  -3   50.36   14.89
   4   6  -3   54.25   14.37
  -4  -6   4    5.96    5.94
   4  -6   4    1.74    6.93
  -4   6  -4    6.35    8.33
   4   6  -4    1.40    6.25
  -4   6  -4   -2.35    7.44
  -4  -6   4   -0.32    5.99
   4   6  -4    2.41    5.64
  -4  -6   5   -4.16    6.27
   4  -6   5    0.46    7.43
  -4   6  -5   22.11    8.89
   4   6  -5    1.08    5.32
   4   6  -5    4.79    6.72
  -4   6  -5   -4.02    7.80
  -4  -6   5   -1.41    5.50
  -4  -6   6   90.50   20.90
   4   6  -6   75.29   20.71
  -4  -6   6   43.68   21.10
   4  -6   6   63.17   21.89
  -4   6  -6  105.89   22.83
   4   6  -6   72.68   21.40
  -4   6  -6   73.58   22.27
  -4  -6   7   33.93   10.73
   4   6  -7   37.49   10.72
  -4  -6   7   35.59   12.28
  -4   6  -7   35.75   13.71
   4   6  -7   45.10   12.58
  -4   6  -7   41.41   13.79
   4   6  -8   55.37   18.22
  -4  -6   8   70.45   18.28
  -4   6  -8  112.46   21.52
  -4  -6   8   67.75   19.81
   4   6  -8   78.46   20.28
  -4   6  -8   92.32   20.99
   4   6  -9   24.17   15.32
  -4  -6   9   18.83   13.18
   4   6  -9   50.66   14.02
  -4   6  -9   47.42   15.36
  -4   6  -9   48.53   14.71
   4   6 -10  111.54   46.51
  -4  -6  10  123.56   45.59
  -4   6 -10  223.15   46.69
   4   6 -10  167.18   45.89
  -4   6 -10  211.76   46.83
   4   6 -11  128.65   44.67
  -4   6 -11  175.05   44.38
   4   6 -11  161.44   43.95
  -4   6 -11  192.26   45.08
   4   6 -12  125.36   44.24
  -4   6 -12  162.02   43.71
  -4   6 -12  181.63   44.53
   4   6 -12  174.64   43.57
   4   6 -13  174.50   56.58
  -4   6 -13  206.55   56.05
  -4   6 -13  235.71   56.92
   4   6 -13  225.29   56.00
  -4   6 -14  103.94   28.45
   4   6 -14   81.98   26.94
  -4   6 -14   92.02   26.89
  -4   6 -15   84.32   25.84
   4   6 -15   80.92   24.30
  -4   6 -15   74.46   24.10
  -4   6 -16   28.39   16.98
   4   6 -16    8.62   14.63
  -4   6 -16   36.74   13.91
  -4   6 -17    3.21   16.13
   4   6 -17   30.82   14.64
  -5  -6 -16   19.33   16.87
   5   6  16   26.57   17.17
  -5   6  16   40.04   15.27
  -5   6  16   28.82   14.66
  -5  -6 -15   49.78   18.76
   5   6  15   54.75   18.23
  -5   6  15   30.65   15.94
  -5   6  15   34.84   16.53
  -5  -6 -14   55.00   18.53
   5   6  14   61.16   18.35
  -5   6  14   30.71   16.04
  -5   6  14   27.08   16.38
   5   6  13   23.78   16.31
  -5   6  13   37.32   14.66
   5   6  13   33.44   17.49
  -5   6  13   42.29   15.84
  -5  -6 -13   52.03   17.67
   5   6  12  110.63   31.49
   5   6  12  139.08   31.10
  -5   6  12   92.08   29.64
  -5   6  12   56.15   29.91
  -5  -6 -12  145.56   31.60
   5   6  11   17.96   13.59
  -5   6  11   26.71   11.57
  -5   6  11   12.10   12.98
  -5  -6 -11   32.09   15.55
   5   6  11   41.19   16.10
   5   6  10  244.67   51.57
  -5   6  10  146.42   51.00
  -5   6  10  176.64   50.54
   5   6  10  219.64   52.11
   5   6   9   51.78   16.12
  -5   6   9   38.01   16.13
  -5   6   9   29.40   14.56
   5   6   9   72.47   17.75
  -5   6   8  210.45   56.79
  -5  -6  -8  318.38   58.62
   5   6   8  240.99   57.47
  -5   6   8  188.61   57.65
  -5   6   8  156.24   56.72
   5   6   8  240.91   58.28
  -5   6   7   12.40    9.30
   5   6   7   26.85   10.97
  -5   6   7   22.00   12.27
  -5   6   7    9.90    9.25
   5   6   7   24.63   12.80
  -5  -6  -7   42.13   13.18
   5  -6  -6   65.45   21.32
   5   6   6   97.21   22.96
   5   6   6   96.42   23.25
  -5   6   6   74.98   23.74
  -5   6   6   52.86   22.22
  -5  -6  -6  131.60   24.65
   5   6   6  109.56   24.60
   5   6   5   19.83   11.61
   5  -6  -5   13.80    6.52
   5   6   5   36.81    9.65
   5  -6  -5   20.19    8.63
   5   6   5   28.96    9.76
  -5   6   5   15.25   11.17
  -5   6   5    4.88    8.21
  -5  -6  -5   22.66   11.52
   5   6   4   -7.64   10.22
   5  -6  -4   -2.28    4.36
   5   6   4   -0.80    7.12
   5  -6  -4   -3.79    6.66
   5   6   4    6.80    7.32
  -5   6   4   -3.43    9.21
  -5   6   4    4.01    6.44
  -5  -6  -4   -4.58    9.69
   5   6   3  -13.68   10.95
   5  -6  -3    1.11    4.61
   5   6   3    3.33    6.93
   5  -6  -3   -2.04    6.64
   5   6   3   -0.79    7.06
  -5   6   3    6.82   10.00
  -5   6   3   -9.00    6.85
  -5  -6  -3   14.33    9.94
   5   6   2   19.64   10.51
   5  -6  -2    5.37    5.59
   5  -6  -2    9.21    6.92
   5   6   2    1.83    7.20
  -5  -6  -2   11.84   10.02
  -5   6   2   10.47    7.02
   5  -6  -1   11.39    5.94
  -5  -6  -1   -1.63    6.87
   5  -6  -1   15.28    7.01
   5   6   1    4.12    6.70
  -5  -6  -1    3.93    9.23
  -5   6   1   10.31    7.07
   5  -6   0   58.07   18.15
  -5  -6   0  114.56   20.14
  -5  -6   0   64.40   18.45
   5  -6   0   40.87   18.30
   5   6   0   53.82   18.25
  -5   6   0   56.39   18.53
   5   6   0   98.09   19.55
  -5  -6   1  219.37   41.79
  -5  -6   1  121.19   40.63
   5  -6   1  113.85   40.82
  -5   6  -1  190.13   42.27
   5   6  -1  118.94   40.63
   5   6  -1  192.61   41.38
  -5   6  -1  177.11   41.10
   5  -6   1  149.95   40.83
  -5  -6   2  127.91   47.95
  -5   6  -2  201.70   49.49
   5  -6   2  133.40   48.23
   5   6  -2  143.45   48.00
   5   6  -2  237.78   48.71
  -5  -6   2  270.56   48.94
  -5   6  -2  203.30   48.57
  -5  -6   3  179.38   35.84
  -5  -6   3   83.87   34.87
  -5   6  -3  176.27   36.86
   5   6  -3  143.78   35.45
   5   6  -3  112.48   35.03
   5  -6   3   82.40   35.23
  -5   6  -3  156.59   35.74
  -5  -6   4  329.26   67.65
  -5  -6   4  158.16   67.05
   5  -6   4  197.15   67.49
   5   6  -4  303.82   67.48
  -5   6  -4  309.33   68.63
   5   6  -4  250.10   67.23
  -5   6  -4  263.66   67.73
   5   6  -5   26.36   14.86
  -5  -6   5   28.90   12.80
   5  -6   5   39.40   13.82
  -5  -6   5   58.27   13.27
   5   6  -5   51.88   13.03
  -5   6  -5   53.58   15.78
   5   6  -5   33.45   12.86
  -5   6  -5   34.39   14.33
  -5  -6   6  286.55   58.47
  -5  -6   6  125.33   58.10
   5   6  -6  245.09   58.32
  -5   6  -6  242.09   59.61
   5   6  -6  171.10   59.23
   5   6  -6  211.08   58.35
  -5   6  -6  259.15   59.20
  -5  -6   7   91.21   21.76
   5   6  -7   52.92   23.59
  -5  -6   7   37.31   21.69
  -5   6  -7   79.18   23.76
   5   6  -7   87.32   22.17
  -5   6  -7  106.15   23.57
  -5  -6   8  195.88   46.69
  -5   6  -8  203.33   48.50
   5   6  -8  145.88   48.37
   5   6  -8  160.32   47.18
  -5   6  -8  177.46   48.13
   5   6  -9   33.45   17.96
   5   6  -9   50.34   16.01
  -5   6  -9   50.01   17.53
  -5   6  -9   70.60   18.07
   5   6 -10   26.23   11.75
  -5   6 -10   39.62   13.86
   5   6 -10   19.13   14.98
  -5   6 -10   29.60   13.57
  -5   6 -11   -1.54   11.36
   5   6 -11    2.06    8.97
  -5   6 -11    3.80   11.13
   5   6 -11   -5.43   12.91
  -5   6 -12    0.82   12.11
   5   6 -12   17.77    9.82
  -5   6 -12   11.60   11.97
   5   6 -12  -10.37   12.68
  -5   6 -13    5.23   13.44
   5   6 -13   11.95   10.91
  -5   6 -13   19.67   12.61
   5   6 -13   13.76   14.20
  -5   6 -14   -1.85   13.53
   5   6 -14    4.10   14.11
  -5   6 -14   -4.80   12.86
  -5   6 -15   -1.96   14.83
  -5   6 -15   17.06   12.99
   6   6  14    0.88   14.55
  -6   6  14    3.44   12.83
   6   6  14   36.66   17.63
  -6  -6 -14   -8.79   14.71
   6   6  13   44.76   14.92
  -6   6  13    4.26   12.58
  -6  -6 -13  -19.12   15.71
   6   6  13   31.21   17.13
   6   6  12   15.53   12.69
  -6   6  12    9.26   12.52
  -6  -6 -12    1.03   14.29
   6   6  12   11.05   14.91
   6   6  11    5.07   11.69
  -6   6  11   11.66   11.86
   6   6  11  -10.68   13.90
   6   6  10  -11.28   14.82
   6   6  10   -6.76   11.46
  -6   6  10   -4.94   12.25
   6   6   9   25.52   16.01
   6   6   9   30.73   13.20
  -6   6   9   20.23   10.68
  -6   6   9   20.39   13.57
  -6  -6  -9   49.59   15.65
   6   6   8   26.56   14.07
   6   6   8   13.35   10.25
  -6   6   8    2.37    7.85
  -6   6   8    9.69   11.08
  -6  -6  -8    1.77   12.58
  -6  -6  -7  277.01   45.99
   6   6   7  172.55   43.94
  -6   6   7  181.85   44.93
  -6   6   7   70.65   42.84
   6   6   7  212.92   45.57
   6   6   6   56.41   15.39
   6   6   6   31.55   11.79
  -6   6   6   21.47   13.15
  -6   6   6    8.13    9.52
  -6  -6  -6   38.37   14.55
   6  -6  -5  165.93   44.76
  -6  -6  -5  269.52   47.30
   6   6   5  186.80   45.50
  -6   6   5  220.63   47.08
  -6   6   5   93.42   44.74
   6  -6  -4   31.67    9.60
   6   6   4   16.15   10.57
  -6   6   4   41.73   13.89
  -6  -6  -4   39.81   13.84
  -6   6   4   17.71    9.92
  -6   6   3  215.90   46.45
   6   6   3  165.36   44.70
  -6   6   3  129.34   44.42
   6  -6  -3  137.28   44.41
  -6  -6  -3  284.26   46.69
   6  -6  -2   25.74    7.82
   6   6   2   14.19    8.09
  -6  -6  -2   21.33   11.40
  -6   6   2   10.19   11.88
  -6   6   2    9.49    8.02
  -6  -6  -1  397.05   63.21
   6   6   1  176.34   61.36
  -6   6   1  233.53   61.63
   6  -6  -1  213.67   61.59
   6  -6   0   -6.59    7.29
  -6  -6   0   -3.13    9.73
   6   6   0    2.06    6.03
  -6   6   0   -0.37    7.19
   6  -6   1   78.73   21.49
   6   6  -1   47.80   20.60
  -6   6  -1   70.98   21.32
   6   6  -2    8.76   10.89
  -6  -6   2   10.73    9.18
   6   6  -2   -2.92    6.28
  -6   6  -2   13.51   11.35
  -6   6  -2   20.83    8.30
   6  -6   2    1.36    8.04
   6   6  -3    8.86   11.25
  -6  -6   3    4.80    8.83
   6   6  -3   11.51    6.44
  -6   6  -3   15.21   11.02
  -6   6  -3    4.92    8.24
   6  -6   3   15.68    8.75
   6   6  -4   20.46   12.93
  -6  -6   4   31.07   10.78
  -6   6  -4   47.67   13.35
   6   6  -4   13.00    8.04
  -6   6  -4    8.17   10.00
   6   6  -5   15.85   11.62
  -6  -6   5    0.94    8.43
  -6   6  -5    7.35   11.69
  -6   6  -5    6.21    9.15
   6   6  -6    5.97   13.73
  -6  -6   6   41.50   11.57
  -6   6  -6   11.57   14.46
  -6   6  -6   43.96   12.89
   6   6  -7   46.37   19.08
  -6  -6   7   54.00   16.64
  -6   6  -7   48.55   19.24
  -6   6  -7   71.74   18.35
  -6   6  -8   19.25   11.46
   6   6  -8   -6.30   12.18
  -6   6  -8   24.62   13.56
  -6   6  -9  127.09   37.82
   6   6  -9  111.30   38.69
  -6   6  -9  174.93   39.20
  -6   6 -10    7.88   12.92
   6   6 -10    7.66   13.35
  -6   6 -10    2.94   11.72
  -6   6 -11  111.25   31.48
  -6   6 -11  120.90   32.21
   6   6 -11   86.12   32.10
  -6   6 -12   14.18   13.98
  -6   6 -12   23.48   14.02
   6   6 -12    9.22   15.50
  -6   6 -13   84.18   22.45
  -6   6 -13   66.06   22.38
   6   6 -13   27.60   21.94
  -6   6 -14   10.34   14.29
   6   6 -14    2.20   15.33
  -6   6 -14   -2.79   14.14
   7   6  12  149.28   35.43
  -7   6  12   85.01   32.76
   7   6  11   12.00   16.51
  -7   6  11  -11.03   12.93
   7   6  10  147.36   39.27
  -7   6  10   64.00   37.21
  -7  -6 -10  193.09   39.14
   7   6   9   -1.03   14.84
  -7   6   9    3.64   12.38
  -7  -6  -9   -3.08   14.55
  -7   6   8   54.33   25.32
  -7  -6  -8  114.97   27.26
  -7   6   7    6.32   12.62
  -7  -6  -7   18.17   13.64
  -7  -6  -6   81.24   23.20
  -7   6   6   55.78   22.53
  -7  -6  -5   14.23   12.73
  -7   6   5   -2.69   12.43
  -7  -6  -4   31.72   14.36
  -7   6   4   15.25   13.59
  -7  -6  -3   14.02   12.51
  -7   6   3   15.26   13.00
   7   6   2   17.35   14.71
  -7  -6  -2   21.42   13.66
  -7   6   2   28.77   13.82
   7  -6  -1   11.65    8.75
   7   6   1    0.91   12.40
  -7  -6  -1    9.14   12.26
  -7   6   1   22.55   13.23
   7  -6   0   71.30   24.42
   7   6   0   86.98   26.97
  -7  -6   0  107.35   26.02
   7  -6   1   -6.06    9.30
   7   6  -1   -5.45   12.75
  -7  -6   1   24.47   11.43
  -7  -6   2  177.61   34.87
   7   6  -2  117.65   35.64
   7  -6   2   93.03   33.62
  -7   6  -2  116.18   33.35
   7  -6   3    1.15    9.46
  -7  -6   3   11.44   10.50
   7   6  -3  -11.03   12.84
  -7   6  -3    3.70   13.24
  -7   6  -3    2.15    8.44
  -7  -6   4  208.00   45.62
   7   6  -4  143.20   46.41
  -7   6  -4  195.20   46.99
  -7   6  -4  150.02   44.97
   7  -6   4  151.95   45.48
  -7   6  -5   15.73   10.16
   7   6  -5   12.27   13.62
  -7  -6   5   19.92   10.89
  -7   6  -5   15.10   13.60
   7  -6   5    2.60   11.38
  -7   6  -6  143.53   38.45
  -7  -6   6  154.55   38.41
   7   6  -6  104.68   39.87
  -7   6  -6  154.72   40.39
  -7   6  -7    8.91   10.08
   7   6  -7   -4.90   13.80
  -7   6  -7   -9.67   14.02
  -7   6  -8   76.44   24.89
   7   6  -8   51.08   25.01
  -7   6  -8   90.28   23.47
  -7   6  -9    1.99   13.18
  -7   6  -9   -2.75   11.40
   7   6  -9   18.46   13.64
  -7   6 -10   66.29   20.03
  -7   6 -10   78.62   21.76
   7   6 -10   15.80   20.88
  -7   6 -11   -6.29   13.00
  -7   6 -11    5.11   14.77
   7   6 -11    6.49   14.87
  -8  -6  -8  -16.58   16.22
  -8   6   8  -18.19   15.76
  -8  -6  -7   95.32   27.35
  -8   6   7   71.75   26.56
  -8  -6  -6   11.41   15.06
  -8   6   6  -10.11   14.77
   8   6   5  103.08   40.76
  -8  -6  -5  191.66   41.22
  -8   6   5  129.55   40.70
   8   6   4  -15.88   16.15
  -8  -6  -4    9.70   14.56
  -8   6   4   25.35   14.84
  -8  -6  -3  210.93   44.04
   8   6   3  131.98   44.27
  -8   6   3  121.06   43.50
   8   6   2    2.08   14.37
  -8  -6  -2    9.05   14.14
  -8   6   2   -6.13   14.16
  -8  -6  -1  201.62   40.03
   8   6   1  102.23   39.54
  -8   6   1  105.67   39.66
   8   6   0   -6.18   14.67
  -8  -6   0    8.41   12.75
  -8   6   0   -1.03   13.77
   8   6  -1   66.96   23.42
  -8  -6   1   71.11   22.17
  -8   6  -1   60.27   23.39
   8   6  -2   16.53   15.11
  -8  -6   2    0.78   12.20
   8   6  -3   27.00   16.41
  -8  -6   3   17.82   13.22
   8   6  -4    5.23   14.61
  -8  -6   4   26.91   11.84
   8  -6   4   -9.74   11.87
  -8   6  -4    8.53   14.76
   8  -6   5  -16.15   12.71
   8   6  -5    8.47   14.71
  -8   6  -5  -11.86   15.07
  -8   6  -6   -4.36   14.58
   8   6  -6   -7.51   14.74
   8  -6   6    6.19   12.17
  -8   6  -7   28.67   16.88
   8   6  -7   18.52   15.64
   8  -6   7    3.26   13.52
   0  -7 -19  -21.94   13.83
   0   7  19  -17.36   17.12
   0   7  18  246.94   54.59
   0  -7 -18  157.18   52.58
   0  -7 -17   -5.96   11.05
   0   7  17   -8.76   14.31
   0  -7 -16  130.22   40.64
   0   7  16  170.30   41.95
   0  -7 -15   15.73   11.33
   0   7  15   19.12   13.78
   0  -7 -14   30.15   12.84
   0   7  14   27.87   15.07
   0  -7 -13    5.77    9.72
   0   7  13   13.89   12.46
   0  -7 -12   11.72    9.63
   0   7  12   -1.45   11.41
   0  -7 -11  -11.18    8.99
   0   7  11    2.73   10.57
   0   7  10   12.20   10.51
   0  -7 -10   10.02    9.01
   0  -7  -9   -1.19    7.79
   0  -7  -8  270.04   69.79
   0  -7  -7    1.61    7.28
   0  -7  -7    5.89    7.89
   0   7   7    2.84    5.49
   0  -7  -6  640.24  176.93
   0   7   6  711.34  176.46
   0   7   5   -0.43    4.38
   0  -7  -5    6.67    6.97
   0   7   5    0.89    6.22
   0   7   4  415.22  131.38
   0  -7  -4  519.64  131.56
   0   7   4  544.91  131.08
   0   7   3    4.53    3.97
   0  -7  -3   -8.13    6.01
   0   7   3    8.74    5.61
   0  -7  -2  424.47   94.69
   0   7   2  333.70   94.49
   0  -7  -2  329.57   94.14
   0   7   2  388.58   94.19
   0  -7  -1   -3.98    4.20
   0   7   1    1.96    3.92
   0  -7  -1   -3.03    5.20
   0   7   1    2.13    5.38
   0   7   0  290.72   70.94
   0  -7   0  273.49   71.19
   0   7   0  257.42   71.13
   0  -7   0  279.02   70.93
   0  -7   1   -0.33    4.85
   0  -7   1    0.25    4.52
   0   7  -1    0.53    4.64
   0   7  -1    0.86    5.79
   0   7  -1   -5.65    5.05
   0   7  -2  114.75   25.98
   0   7  -2  133.23   26.62
   0   7  -2  106.53   25.84
   0  -7   2   52.02   25.66
   0  -7   2  102.10   25.82
   0  -7   3   -1.89    5.27
   0   7  -3    6.35    5.74
   0   7  -3    0.91    6.44
   0   7  -3   -4.98    4.74
   0  -7   3   -7.28    4.93
   0  -7   4    6.28    5.56
   0   7  -4    7.07    6.12
   0   7  -4    1.90    4.66
   0  -7   4   -6.98    6.61
   0   7  -4    8.52    6.94
   0   7  -4   -2.33    4.46
   0  -7   5    1.15    5.75
   0   7  -5    4.55    4.69
   0  -7   5    7.76    6.96
   0   7  -5   -3.48    7.21
   0   7  -5   -2.42    4.30
   0  -7   6   72.44   19.70
   0   7  -6   70.96   18.84
   0   7  -6  110.04   20.61
   0  -7   6   67.21   19.95
   0   7  -6   49.20   18.63
   0  -7   7   -4.59    6.98
   0   7  -7   -3.48    4.67
   0  -7   7    4.56    7.62
   0   7  -7    0.63    4.09
   0   7  -7   -0.55    8.05
   0  -7   8  267.48   76.68
   0   7  -8  319.98   76.08
   0   7  -8  421.13   77.46
   0   7  -8  230.44   75.94
   0   7  -9    3.37    3.76
   0   7  -9   -1.88    8.90
   0   7  -9    3.29    4.18
   0   7 -10  272.06   67.93
   0   7 -10  216.59   67.84
   0   7 -11   -2.65    2.88
   0   7 -11    0.86    3.36
   0   7 -11    5.66   10.56
   0   7 -12  126.85   34.51
   0   7 -12  230.26   38.16
   0   7 -13   -5.60   11.56
   0   7 -14  188.29   50.89
   0   7 -15   10.78   13.24
   0   7 -16   18.07   14.27
   0   7 -17   23.12   15.73
   0   7 -18   66.84   24.16
  -1   7  19   -6.36   15.82
   1  -7 -19    2.67   11.65
  -1  -7 -19  -13.33   12.92
  -1   7  18    7.04   14.52
   1  -7 -18    5.17   11.57
  -1  -7 -18    2.76   12.32
  -1   7  17   19.04   14.81
   1  -7 -17   14.99   12.15
  -1  -7 -17   10.62   12.43
  -1   7  16    9.00   13.07
   1  -7 -16   -0.80   10.15
  -1  -7 -16  -22.12   12.03
  -1   7  15  108.74   22.85
   1  -7 -15   44.08   20.84
  -1  -7 -15   54.67   21.12
  -1   7  14   36.84   14.44
   1  -7 -14   19.32   11.99
  -1  -7 -14   23.45   13.04
  -1   7  13  316.19   65.99
  -1  -7 -13  254.74   65.41
   1  -7 -13  189.68   65.00
   1  -7 -12   27.35   11.93
  -1  -7 -12   34.22   13.02
  -1   7  12   26.28   13.92
   1   7  11  462.40   96.77
  -1   7  11  436.30   96.68
  -1  -7 -11  327.54   96.23
   1  -7 -11  293.93   95.97
   1   7  10   -4.60   10.83
  -1   7  10   11.32    9.99
   1  -7 -10   18.78    8.99
  -1  -7 -10    3.88    8.83
   1   7   9  480.55  102.64
  -1   7   9  439.19  102.50
  -1  -7  -9  376.23  102.30
   1  -7  -9  310.55  102.06
   1  -7  -8   23.43    9.74
   1   7   8   23.79   10.34
  -1   7   8   11.72   10.21
   1  -7  -8   30.85    9.46
  -1  -7  -8    2.91    9.33
   1  -7  -7  159.15   54.83
  -1   7   7  272.13   55.48
  -1  -7  -7  240.62   55.30
   1  -7  -7  191.91   55.00
   1   7   7  280.31   55.51
  -1   7   7  195.27   54.94
  -1   7   7  182.59   54.08
   1   7   7  238.18   54.77
   1   7   6    0.33    5.92
  -1   7   6   -0.89    2.94
  -1  -7  -6  -15.14    7.89
   1  -7  -6   -3.22    7.29
   1   7   6    1.55    7.79
  -1   7   6   -4.00    7.58
   1  -7  -6   -0.52    6.73
   1   7   6    3.33    6.96
   1   7   5  110.03   20.69
  -1   7   5  104.94   20.77
  -1  -7  -5   75.66   20.45
   1  -7  -5   62.50   20.32
  -1   7   5   56.58   18.66
  -1  -7  -5   82.59   20.36
   1   7   5   94.14   19.85
   1   7   5   71.54   20.26
   1   7   4    1.51    5.56
  -1   7   4    4.37    2.25
   1   7   4    6.79    6.40
  -1  -7  -4    6.89    6.82
   1  -7  -4   13.13    6.76
   1   7   4    5.59    6.59
  -1   7   4    3.66    6.99
  -1  -7  -4    7.80    6.67
  -1   7   4    3.92    6.21
   1  -7  -3   12.62    6.57
   1   7   3    1.60    6.32
   1   7   3   16.63    6.13
  -1   7   3    5.45    3.13
  -1  -7  -3    6.22    7.07
   1  -7  -3    9.87    6.97
   1   7   3   21.04    7.23
  -1   7   3   17.31    7.22
  -1  -7  -3   20.20    6.92
  -1   7   3    3.75    6.28
   1   7   2   31.81    9.03
   1   7   2   42.35    8.93
  -1   7   2   21.61    7.04
  -1  -7  -2   27.37    9.47
   1  -7  -2   27.00    9.50
   1  -7  -2   10.75    8.96
   1   7   2   21.69    9.28
  -1   7   2   29.54    9.70
  -1   7   2   22.76    9.21
  -1  -7  -2   31.28    9.36
   1  -7  -2   24.71    7.04
  -1  -7  -2   34.83    8.60
   1  -7  -1   91.16   48.27
  -1  -7  -1  180.49   48.59
   1  -7  -1  177.41   48.55
   1   7   1  162.48   48.31
   1   7   1  266.55   48.92
  -1  -7  -1  232.73   48.59
  -1   7   1  203.85   48.54
  -1   7   1  239.27   48.85
  -1  -7  -1  167.40   48.25
   1  -7  -1  166.94   47.81
   1   7   1  209.96   48.40
  -1  -7   0    7.26    5.30
   1  -7   0    7.72    3.96
   1   7   0   10.72    5.60
   1   7   0    5.76    5.53
  -1   7   0   10.27    5.69
   1  -7   0   -5.50    5.92
  -1  -7   0    3.92    6.42
   1  -7   0   16.82    6.66
   1   7   0    0.84    6.58
  -1   7   0    5.18    6.72
  -1  -7   0   11.04    5.73
   1  -7   1  426.84  109.34
   1   7  -1  528.89  109.76
  -1  -7   1  402.26  109.77
   1  -7   1  464.91  109.88
   1   7  -1  290.25  109.37
   1  -7   1   80.12  109.24
   1   7  -1  591.77  110.04
  -1   7  -1  568.87  110.05
  -1  -7   1  520.96  109.66
  -1   7  -1  492.23  109.74
  -1  -7   1  453.79  109.63
   1  -7   2   85.98   23.74
   1   7  -2  103.95   24.42
  -1  -7   2   68.26   24.05
   1   7  -2   44.96   23.59
  -1   7  -2  122.78   24.40
   1   7  -2  106.01   24.62
  -1   7  -2  121.37   24.81
  -1  -7   2   77.21   24.37
   1  -7   2   78.62   24.45
  -1  -7   2   92.83   23.92
  -1   7  -2   79.73   23.99
  -1   7  -3  670.17  153.00
  -1  -7   3  630.46  152.83
   1   7  -3  619.63  153.10
  -1  -7   3  606.02  153.05
  -1   7  -3  859.23  153.23
   1   7  -3  289.19  152.56
  -1  -7   3  519.88  153.12
   1   7  -3  754.55  153.36
   1  -7   3  587.08  152.84
   1  -7   3  516.76  153.12
  -1  -7   4    2.11    4.79
  -1  -7   4   15.36    6.38
   1   7  -4    3.15    4.47
   1  -7   4    6.75    5.67
   1   7  -4   11.86    7.09
  -1   7  -4    9.07    6.17
  -1  -7   4    4.69    6.76
   1  -7   4    8.52    7.10
   1   7  -4    4.15    6.70
  -1   7  -4    7.29    5.44
  -1  -7   5  481.48  101.92
   1  -7   5  485.08  101.73
   1   7  -5  507.78  102.07
  -1   7  -5  488.60  101.61
  -1   7  -5  633.21  101.87
   1   7  -5  245.32  101.10
  -1  -7   5  161.85  101.08
  -1  -7   5  421.91  101.92
   1  -7   5  492.67  102.12
   1   7  -5  639.50  102.36
   1   7  -6    5.40    5.42
  -1   7  -6    5.10    6.59
  -1  -7   6   11.41    7.99
   1  -7   6   22.10    7.97
   1   7  -6   17.85    8.58
   1   7  -6   23.29    5.80
  -1   7  -6   27.87    7.26
  -1  -7   6    6.54    8.16
   1  -7   6    9.39    8.75
   1   7  -6   16.26    8.86
  -1  -7   7  198.25   52.16
   1  -7   7  246.75   52.25
   1   7  -7  273.73   52.66
  -1   7  -7  192.57   51.61
   1   7  -7  129.50   51.08
   1   7  -7  187.40   51.17
  -1   7  -7  303.34   51.98
  -1  -7   7  232.79   52.39
   1   7  -7  322.49   52.88
   1  -7   8   28.60    9.48
  -1   7  -8   11.23    7.10
   1   7  -8   11.99    4.79
   1   7  -8   17.71    5.06
  -1   7  -8   42.42    8.10
   1   7  -8   33.08   10.34
  -1   7  -9   23.25   14.11
   1   7  -9   68.51   16.42
  -1   7  -9   61.31   14.63
   1   7 -10   80.62   17.05
  -1   7 -10   65.63   14.58
  -1   7 -11   12.12    6.96
  -1   7 -11    0.83    6.07
   1   7 -11   21.27   10.84
  -1   7 -12   -5.39    6.06
   1   7 -12    2.92   10.54
  -1   7 -13    8.35    6.66
   1   7 -13   17.83   12.19
  -1   7 -13   13.99   12.77
  -1   7 -14   37.53   16.43
  -1   7 -15  118.31   32.65
   1   7 -15  103.00   32.11
  -1   7 -16    8.80   13.26
   1   7 -16  -12.01   13.37
  -1   7 -17   89.85   29.68
   1   7 -17   99.67   29.29
  -1   7 -18   11.98   15.79
   1   7 -18   -2.06   14.61
   2   7  19   50.89   18.22
  -2   7  19   18.61   17.04
   2  -7 -19    4.40   13.04
  -2  -7 -19   23.08   15.61
   2   7  18   91.20   22.49
  -2   7  18   78.46   20.97
  -2  -7 -18   42.62   19.32
   2  -7 -17    9.13   11.37
   2   7  17    5.08   14.96
  -2   7  17    0.93   13.75
  -2  -7 -17   14.93   12.71
   2  -7 -16   10.44   15.64
  -2   7  16   70.22   18.57
   2   7  16   66.36   19.57
  -2  -7 -16   34.10   17.30
   2  -7 -15  -10.87   10.71
   2   7  15  -18.16   13.72
  -2   7  15   -5.80   12.53
  -2  -7 -15   -0.86   11.29
   2  -7 -14   23.23   15.48
   2   7  14   59.11   18.35
  -2   7  14   43.00   17.39
  -2  -7 -14   60.26   17.60
   2  -7 -13  -10.84    9.58
   2   7  13   -2.42   11.91
  -2   7  13   14.00   11.73
  -2  -7 -13    6.32   10.41
   2  -7 -12   13.23    9.32
  -2   7  12   -5.72    5.72
   2   7  12    8.36   11.43
  -2   7  12    6.94   11.16
  -2  -7 -12   -9.81   10.55
   2  -7 -11   14.75    9.02
  -2   7  11    5.41    5.09
   2   7  11   -9.29   11.23
  -2   7  11   13.06   10.72
  -2  -7 -11  -16.54   10.21
  -2   7  10   58.85   20.50
   2  -7 -10   39.34   22.02
   2   7  10  130.20   23.90
  -2   7  10   93.49   23.07
  -2  -7 -10   90.33   23.17
  -2   7   9   21.21    6.86
   2  -7  -9   13.64   10.01
   2   7   9   24.59   11.44
  -2  -7  -9   30.57   11.44
  -2   7   9   22.61   11.17
  -2   7   8   89.63   30.43
   2  -7  -8  145.37   32.39
   2   7   8  212.09   33.12
  -2   7   8  193.23   32.84
   2  -7  -8   53.70   31.66
   2   7   8  183.61   32.56
   2  -7  -7   85.26   20.38
   2   7   7   88.60   20.80
  -2   7   7   63.27   20.45
   2  -7  -7   32.15   19.77
   2   7   7   90.26   20.34
   2   7   6  303.57   73.12
  -2  -7  -6  283.61   73.07
   2  -7  -6  245.07   72.89
   2   7   6  367.63   73.40
  -2   7   6  353.14   73.24
  -2  -7  -6  388.01   73.48
  -2   7   6  234.59   72.85
   2  -7  -6   70.19   72.46
   2   7   6  298.94   72.92
   2   7   5   46.02   11.84
   2  -7  -5    3.73   11.28
  -2  -7  -5   23.31   11.70
   2  -7  -5   39.25   11.78
  -2  -7  -5   29.59   12.09
   2   7   5   53.63   12.48
  -2   7   5   38.23   12.22
   2   7   5   48.08   12.25
   2   7   4  613.54  162.51
  -2  -7  -4  499.79  162.45
   2  -7  -4  470.08  162.34
   2   7   4  756.27  162.71
  -2   7   4  662.91  162.59
  -2  -7  -4  699.52  162.65
   2   7   4  650.79  162.47
   2   7   3  331.49   81.15
  -2  -7  -3  272.05   81.10
   2  -7  -3  232.64   81.00
   2   7   3  355.01   81.28
  -2   7   3  318.69   81.17
  -2  -7  -3  357.27   81.28
  -2   7   3  252.18   80.99
   2   7   3  341.63   81.14
   2   7   2  479.05  122.64
   2   7   2  561.18  122.77
  -2  -7  -2  379.27  122.60
   2  -7  -2  340.22  122.53
   2   7   2  524.63  122.77
  -2   7   2  474.12  122.72
  -2  -7  -2  582.84  122.83
  -2  -7  -2  402.84  122.50
  -2   7   2  460.24  122.67
   2  -7  -1   12.17    5.33
   2   7   1   42.75    8.88
  -2   7   1   28.37    8.63
  -2  -7  -1   21.69    8.48
   2  -7  -1   15.73    8.48
  -2  -7  -1   37.90    8.78
   2   7   1   29.68    8.78
  -2   7   1   30.51    8.54
  -2   7   1   34.32    8.88
  -2  -7  -1   22.76    8.46
   2   7   1   21.77    8.29
   2  -7   0  227.92   71.52
  -2   7   0  275.45   72.24
   2   7   0  284.77   72.08
  -2   7   0  350.02   72.54
  -2  -7   0  224.49   72.10
   2  -7   0  228.72   72.19
   2   7   0  352.46   72.45
  -2   7   0  310.88   72.42
  -2  -7   0  337.70   72.23
  -2  -7   0  235.48   72.12
   2   7   0  320.85   72.37
  -2  -7   1    3.15    6.40
   2  -7   1    7.82    3.88
  -2   7  -1    3.97    6.07
  -2  -7   1   -4.28    5.94
   2  -7   1   -2.48    6.06
  -2  -7   1   -5.00    5.70
   2   7  -1  -10.86    6.59
   2   7  -1   -3.15    5.32
   2   7  -1    5.49    6.53
  -2   7  -1   -8.48    6.71
  -2   7  -1   -1.64    5.74
  -2  -7   2   11.46    6.74
   2   7  -2    4.41    6.72
   2  -7   2    3.18    4.93
  -2   7  -2   -0.40    6.36
  -2   7  -2   14.23    6.99
  -2  -7   2    8.65    6.77
   2  -7   2   11.06    6.77
   2   7  -2   13.75    5.83
   2   7  -2    6.34    6.66
  -2  -7   2    9.65    5.63
  -2   7  -2   10.12    6.94
  -2  -7   3   39.90   12.30
   2   7  -3   45.47   12.47
   2  -7   3   51.61   11.45
  -2   7  -3   50.81   12.32
  -2  -7   3   24.53   11.93
   2   7  -3   33.92   11.17
   2  -7   3   26.92   12.19
  -2   7  -3   20.88   11.65
   2   7  -3   25.10   11.84
  -2   7  -3   42.10   12.54
  -2  -7   3   44.14   11.30
  -2   7  -4   19.44   11.54
  -2  -7   4   33.88   12.08
   2   7  -4   32.37   12.41
   2  -7   4   38.73   11.28
   2   7  -4   37.91   10.76
  -2   7  -4   41.72   11.98
  -2  -7   4   42.79   12.00
   2  -7   4   25.34   12.04
   2   7  -4   40.77   12.07
  -2   7  -4   45.08   12.51
  -2  -7   4   37.81   10.66
  -2  -7   5   10.50    7.27
   2   7  -5    4.16    7.55
   2  -7   5   -2.15    6.07
  -2  -7   5   -4.74    4.25
  -2   7  -5    4.62    6.15
   2   7  -5    3.44    4.27
  -2  -7   5    4.76    6.77
  -2   7  -5    4.13    6.95
   2  -7   5   -0.48    7.10
   2   7  -5    4.68    7.12
  -2   7  -5    6.86    7.95
  -2  -7   6   58.64   19.17
   2   7  -6   84.64   19.67
   2  -7   6   76.55   18.95
  -2   7  -6   10.71   18.25
  -2   7  -6  108.52   19.38
   2   7  -6   97.89   19.46
  -2   7  -6  104.27   20.13
  -2  -7   6   68.50   19.09
   2  -7   6   69.77   19.60
  -2  -7   6   43.38   17.47
   2   7  -6   67.74   17.59
   2   7  -7   33.57   11.55
   2  -7   7   34.62   10.26
   2   7  -7   22.39    7.03
  -2  -7   7   33.94   10.68
   2   7  -7   22.40    6.89
  -2   7  -7   45.28   10.38
   2   7  -7   51.48   11.30
  -2   7  -7   53.78   11.79
  -2   7  -7    4.58    9.14
   2   7  -8  258.48   74.06
   2  -7   8  282.08   73.75
  -2   7  -8  314.16   73.63
  -2  -7   8  218.20   73.71
   2   7  -8  307.67   74.02
  -2   7  -8  287.42   74.24
   2   7  -9   74.80   24.48
   2  -7   9   78.79   23.17
  -2   7  -9  106.53   23.46
   2   7  -9   76.74   24.10
  -2   7  -9   71.99   24.65
   2  -7  10  120.64   39.64
   2   7 -10  137.18   40.95
  -2   7 -10  168.34   39.95
   2   7 -10  168.29   40.82
  -2   7 -10  152.96   41.16
  -2   7 -11    4.53    7.59
   2  -7  11    3.09    6.97
   2   7 -11   11.28    9.88
  -2   7 -11  -19.56   11.63
  -2   7 -12  299.40   80.79
   2   7 -12  334.49   81.78
  -2   7 -12  322.73   82.09
  -2   7 -13   39.46   12.74
   2   7 -13   35.26   14.83
  -2   7 -13   33.04   16.65
  -2   7 -14  127.42   37.93
   2   7 -14  135.49   37.24
  -2   7 -14  135.28   35.54
  -2   7 -15   35.14   16.31
   2   7 -15   14.37   13.85
   2   7 -16   42.96   18.10
   2   7 -17   -9.47   14.25
   2   7 -18   17.99   15.21
   3   7  18   16.41   16.08
  -3   7  18    4.76   14.31
  -3  -7 -18  -18.56   14.71
   3  -7 -18    0.86   10.64
   3   7  17   14.52   17.42
  -3  -7 -17   31.82   16.09
   3  -7 -17    1.68   12.91
   3   7  16   16.68   15.59
  -3   7  16   24.75   14.76
  -3  -7 -16   26.82   14.51
   3  -7 -16    4.92   11.20
   3   7  15  121.52   26.05
  -3   7  15   89.49   25.03
  -3  -7 -15  126.16   25.56
   3   7  14   35.02   14.39
  -3  -7 -14    7.07   13.69
  -3   7  14   32.70   13.27
   3  -7 -14    1.54   10.54
   3   7  13  217.00   37.84
  -3   7  13  169.13   36.78
  -3  -7 -13  177.95   37.33
  -3  -7 -12   70.53   20.30
   3   7  12   83.12   20.77
  -3   7  12   74.29   19.90
   3  -7 -12   18.15   18.06
   3   7  11  192.04   38.29
  -3   7  11  182.02   37.80
  -3  -7 -11  186.77   38.31
  -3  -7 -10  112.39   26.93
   3   7  10  166.67   27.52
  -3   7  10  113.39   26.57
   3   7  10  143.45   27.09
  -3   7  10   74.18   23.86
   3   7   9  298.91   40.30
  -3   7   9  207.21   39.28
   3   7   9  266.41   39.90
   3   7   8   85.26   17.33
  -3   7   8   39.64   16.39
   3   7   8   82.99   17.34
   3  -7  -7  194.12   64.19
   3   7   7  269.88   64.75
  -3   7   7  225.89   64.43
  -3  -7  -7  281.66   64.90
   3   7   7  256.13   64.70
   3   7   6   38.42   12.89
  -3  -7  -6   40.96   13.28
   3  -7  -6   22.43   12.17
   3   7   6   36.87   13.11
  -3   7   6   33.49   12.44
   3   7   5   -6.74    8.22
  -3  -7  -5    0.57    8.40
  -3  -7  -5    5.11    7.65
  -3   7   5    1.76    7.83
   3  -7  -5   14.26    7.28
   3   7   5   -6.55    8.02
  -3   7   5   -8.39    7.82
   3   7   4    6.59    8.06
  -3  -7  -4    7.51    7.79
  -3  -7  -4    0.88    7.47
   3  -7  -4    0.42    7.09
   3   7   4    3.93    7.69
   3   7   4    2.39    7.17
  -3   7   4   -1.36    7.02
   3   7   3   60.92   16.59
  -3  -7  -3   78.19   16.82
  -3  -7  -3   44.23   16.19
   3  -7  -3   40.67   15.99
   3   7   3   46.87   16.22
   3   7   3   60.41   16.38
  -3   7   3   41.13   16.14
   3   7   2   51.13   10.57
  -3  -7  -2   29.29    9.98
  -3  -7  -2   11.34    9.36
  -3   7   2   21.90   10.16
   3   7   2   24.03    9.54
   3  -7  -2    1.22    9.10
   3   7   2   18.74    9.49
  -3   7   2   23.63    9.70
  -3  -7  -2   31.10   10.05
  -3   7   2   22.51    9.86
   3  -7  -1   22.32    6.05
   3   7   1   18.43    9.69
  -3   7   1   12.78    9.23
  -3  -7  -1   45.38    9.90
  -3  -7  -1   20.06    9.06
   3   7   1   48.30    9.59
  -3   7   1   36.00   10.07
   3  -7  -1   17.92    8.95
   3   7   1   25.34    9.39
  -3   7   1   35.50    9.45
   3  -7  -1   17.16    6.16
  -3  -7  -1   12.84    9.22
  -3  -7   0   69.06   22.35
   3  -7   0   82.14   20.89
   3   7   0   89.73   22.51
  -3   7   0  109.41   22.80
  -3  -7   0   99.30   22.31
  -3  -7   0   59.05   21.89
   3  -7   0   52.78   21.87
  -3   7   0   39.70   21.97
   3   7   0   71.56   21.97
  -3   7   0   80.38   22.18
   3   7   0   92.33   22.08
  -3   7  -1  201.27   38.76
  -3  -7   1  105.01   37.89
   3  -7   1  112.62   38.06
  -3  -7   1  182.48   38.12
   3   7  -1  129.34   37.98
  -3   7  -1  151.95   38.21
   3   7  -1  156.49   37.98
  -3  -7   1  123.33   38.22
  -3   7  -1   71.26   37.93
   3   7  -1  144.07   38.42
   3   7  -2   80.41   28.22
  -3   7  -2  146.04   28.63
  -3   7  -2   34.58   27.70
  -3  -7   2  135.93   27.80
   3   7  -2  111.53   28.03
  -3  -7   2   67.06   27.70
  -3   7  -2  115.83   28.30
   3  -7   2   81.87   27.95
   3   7  -2   93.34   27.58
  -3  -7   2  102.32   28.24
   3   7  -3  306.10   79.73
  -3   7  -3  393.90   79.88
  -3  -7   3  222.07   79.19
  -3   7  -3   81.45   79.05
   3  -7   3  227.77   79.32
  -3  -7   3  385.16   79.25
   3   7  -3  281.19   79.36
  -3   7  -3  378.64   79.83
   3   7  -3  334.76   79.12
  -3  -7   3  279.29   79.54
   3   7  -4  186.85   42.77
  -3   7  -4  206.09   42.60
  -3  -7   4  121.58   42.00
  -3  -7   4  181.17   41.73
   3   7  -4  165.29   42.28
  -3   7  -4  174.69   42.51
   3   7  -4  162.66   41.65
   3  -7   4  134.52   42.26
  -3   7  -4   24.87   41.65
   3   7  -5  145.87   41.22
  -3   7  -5  169.14   41.10
  -3  -7   5  111.59   40.57
   3  -7   5  129.90   40.95
   3   7  -5  164.45   40.93
  -3  -7   5  170.65   40.13
  -3   7  -5  177.64   41.27
   3   7  -5  139.73   40.06
   3   7  -6  178.56   51.14
   3  -7   6  210.64   50.88
  -3   7  -6  250.11   51.22
  -3  -7   6  153.66   50.62
   3   7  -6  182.95   49.86
   3   7  -6  223.72   50.93
  -3   7  -6  227.66   51.31
  -3  -7   6  176.81   49.84
   3   7  -7  195.52   46.47
   3  -7   7  209.81   45.87
   3   7  -7  151.31   44.52
  -3  -7   7  152.46   45.67
  -3   7  -7  285.03   46.40
   3   7  -7  212.09   46.03
  -3   7  -7  259.62   46.76
  -3  -7   7  155.30   44.51
   3   7  -8   85.62   28.56
   3  -7   8  103.79   27.81
  -3   7  -8  121.73   28.19
  -3  -7   8   81.53   27.78
   3   7  -8  101.77   28.12
  -3   7  -8  102.22   28.71
   3  -7   9   79.29   24.80
   3   7  -9   84.48   25.51
  -3   7  -9   87.40   25.23
  -3   7  -9  108.60   26.28
   3  -7  10    2.43    8.15
   3   7 -10   -6.59    9.86
  -3   7 -10  -18.24   11.36
  -3   7 -10   -1.05    8.72
  -3   7 -11   10.09    9.08
   3   7 -11   12.12   10.29
  -3   7 -11    1.55   11.39
  -3   7 -12   -5.90    9.03
   3   7 -12   -8.15   10.48
  -3   7 -12   13.15   11.96
  -3   7 -13   30.38   12.22
   3   7 -13   26.72   13.58
  -3   7 -13   30.48   15.37
  -3   7 -14   18.44   13.43
   3   7 -14   19.19   12.69
  -3   7 -14    2.19    9.81
  -3   7 -15   35.10   17.69
   3   7 -15   41.53   16.92
  -3   7 -16   14.41   14.83
   3   7 -16    0.86   13.75
  -3   7 -17   60.78   21.66
   3   7 -17   41.04   19.60
   4   7  17   27.46   19.78
  -4   7  17   35.60   16.97
  -4  -7 -17   41.67   18.95
  -4   7  17   59.98   19.04
  -4  -7 -16   14.44   16.33
  -4   7  16   25.47   13.75
   4   7  16   36.01   17.49
  -4   7  16   37.84   15.72
  -4  -7 -15   77.50   20.66
  -4   7  15   24.08   18.00
   4   7  15   56.76   20.84
  -4   7  15   59.08   19.40
  -4  -7 -14   50.67   17.06
  -4   7  14   20.27   15.32
   4   7  14   36.60   17.02
  -4   7  14   43.30   15.79
  -4  -7 -13    1.84   12.23
  -4   7  13   -6.33   11.13
   4   7  13   -0.84   12.53
  -4   7  13    4.84   10.79
  -4  -7 -12   17.64   13.15
  -4   7  12   10.04    9.81
   4   7  12    7.13   12.23
  -4   7  12    4.57   10.78
   4   7  12    2.40   12.29
  -4  -7 -11   10.99   12.04
  -4   7  11    6.02    9.89
   4   7  11   13.41   11.46
  -4   7  11    2.46   10.11
   4   7  11   -1.53   11.48
  -4   7  10   12.50   11.07
   4   7  10   20.99   12.01
  -4   7  10   29.61   11.42
   4   7  10   17.66   12.95
  -4   7   9   57.43   18.62
   4   7   9   65.66   19.15
  -4   7   9   30.74   18.03
   4   7   9   94.82   20.08
   4   7   8   62.09   20.03
  -4  -7  -8   90.83   20.39
  -4   7   8   58.22   19.19
   4   7   8   67.72   19.38
  -4   7   8   39.01   18.33
   4   7   7   87.12   24.27
  -4  -7  -7  111.90   24.65
   4  -7  -7   78.00   23.00
  -4   7   7   70.70   23.86
   4   7   7   98.75   23.90
  -4   7   7   53.97   22.78
   4   7   6  157.41   40.40
   4  -7  -6  123.26   40.02
  -4   7   6  159.38   40.83
  -4  -7  -6  172.78   41.10
   4   7   6  181.04   40.69
  -4   7   6  109.99   40.07
   4   7   6  168.02   41.09
   4   7   5  130.69   32.69
  -4  -7  -5  168.59   33.60
   4  -7  -5   97.41   32.36
   4   7   5  119.24   32.77
  -4   7   5  102.26   33.05
  -4   7   5   91.04   32.37
   4   7   5  153.32   33.49
  -4  -7  -4  194.42   63.97
  -4  -7  -4  355.34   64.92
  -4   7   4  249.57   64.60
   4  -7  -4  177.17   63.87
   4   7   4  273.88   64.35
  -4   7   4  189.80   63.92
   4   7   4  284.36   64.85
   4   7   3  113.95   28.69
  -4  -7  -3  159.16   28.99
  -4  -7  -3   94.75   27.72
   4   7   3  103.79   27.89
   4  -7  -3   74.36   27.60
  -4   7   3   70.14   27.62
  -4  -7  -2  281.43   38.52
  -4  -7  -2  171.96   37.29
   4  -7  -2  125.34   37.09
   4   7   2  184.98   37.44
  -4   7   2  164.59   37.33
   4   7   2  233.42   37.90
   4   7   2  223.38   38.35
   4  -7  -2  100.34   35.90
  -4  -7  -1  303.85   53.25
  -4  -7  -1  184.23   52.51
  -4   7   1  259.28   53.55
   4  -7  -1  150.39   52.44
   4   7   1  198.78   52.58
  -4   7   1  187.38   52.65
   4   7   1  270.34   53.02
   4  -7  -1  163.71   51.72
   4   7   1  229.91   53.34
  -4  -7   0  169.95   34.07
  -4  -7   0  107.23   33.44
  -4   7   0  159.44   34.56
   4   7   0  121.09   33.54
  -4   7   0   96.41   33.53
   4  -7   0   83.81   33.40
   4   7   0  156.52   33.80
   4  -7   0  115.39   32.71
   4   7   0  145.36   34.41
  -4  -7   1  183.34   39.06
  -4  -7   1  106.11   38.46
  -4   7  -1  192.22   39.75
   4  -7   1   98.55   38.63
   4   7  -1  152.86   38.65
  -4   7  -1  135.29   38.84
   4   7  -1  144.88   38.75
   4   7  -1  141.10   39.39
   4   7  -2   78.56   17.81
   4   7  -2   57.49   18.82
  -4  -7   2   34.84   17.37
   4  -7   2   41.75   17.74
  -4   7  -2   81.39   18.89
   4   7  -2   47.57   17.62
  -4   7  -2   70.99   18.05
  -4  -7   2   70.45   17.75
   4   7  -3    3.16    6.36
   4   7  -3    5.76    8.60
  -4  -7   3    2.28    6.74
  -4  -7   3    3.36    6.61
   4  -7   3    0.93    7.36
  -4   7  -3   -0.61    8.78
   4   7  -3   10.93    7.11
  -4   7  -3   -1.00    7.69
  -4  -7   4   26.28    9.26
   4   7  -4   18.45   11.74
  -4  -7   4   17.87    9.55
   4   7  -4   26.49    9.01
   4  -7   4    0.49   10.07
  -4   7  -4   28.18   11.48
   4   7  -4   26.99    9.72
  -4   7  -4   38.03   11.19
   4   7  -5    8.17    9.83
  -4  -7   5    3.58    6.12
  -4  -7   5   -3.62    7.12
  -4   7  -5   13.52    9.10
   4   7  -5   10.77    7.45
  -4   7  -5    4.46    8.79
   4   7  -5    1.14    5.77
  -4  -7   6   12.23    6.89
  -4  -7   6    7.56    8.49
   4   7  -6   18.36    6.89
  -4   7  -6   22.88   10.76
   4   7  -6   15.33    8.97
  -4   7  -6   18.91   10.21
  -4  -7   7   30.97    9.62
  -4  -7   7   18.56   11.45
   4   7  -7   30.59    9.64
  -4   7  -7   45.50   13.42
   4   7  -7   23.76   11.76
  -4   7  -7   49.54   13.69
  -4  -7   8   44.80   15.87
  -4  -7   8   41.65   13.42
  -4   7  -8   78.65   17.32
   4   7  -8   55.87   16.34
  -4   7  -8   90.50   17.80
   4   7  -9  111.84   27.67
  -4   7  -9   86.49   27.78
  -4   7  -9   98.95   28.42
   4   7 -10   89.98   27.01
  -4   7 -10   87.80   27.84
  -4   7 -10  107.50   27.30
  -4   7 -11  236.69   61.79
   4   7 -11  225.57   61.54
  -4   7 -11  246.68   62.35
  -4   7 -12   82.55   21.93
   4   7 -12   46.75   22.89
  -4   7 -12   78.50   23.38
   4   7 -12   69.77   21.66
  -4   7 -13  131.08   37.66
   4   7 -13  119.06   38.76
   4   7 -13  134.78   37.66
  -4   7 -13  165.32   39.06
  -4   7 -14   88.86   29.26
   4   7 -14   99.41   28.24
  -4   7 -14   98.16   27.92
  -4   7 -15   42.94   18.85
   4   7 -15   47.32   17.07
  -4   7 -15   32.85   15.96
  -4   7 -16   38.97   18.68
   4   7 -16   38.66   17.16
  -5  -7 -15    6.47   14.82
   5   7  15  -13.44   14.77
  -5   7  15   -7.02   12.61
  -5   7  15   -2.22   12.44
   5   7  15    7.14   16.04
  -5  -7 -14   68.68   23.03
   5   7  14   58.95   22.34
  -5   7  14   47.45   20.87
  -5   7  14   56.50   20.42
   5   7  14   92.15   23.87
  -5  -7 -13   52.15   20.25
   5   7  13   54.72   19.81
  -5   7  13   22.04   18.46
  -5   7  13   68.43   18.44
   5   7  13   74.54   21.30
  -5  -7 -12  112.94   30.16
   5   7  12  105.42   29.61
  -5   7  12   55.74   28.74
  -5   7  12  101.17   28.49
   5   7  12  131.76   30.69
   5   7  11  106.67   26.03
  -5   7  11   52.29   25.47
  -5   7  11   79.03   24.83
   5   7  11  113.90   27.08
   5   7  10   86.31   22.27
   5   7  10   88.73   21.19
  -5   7  10   28.10   20.18
  -5   7  10   59.71   19.60
   5   7   9   40.11   13.31
   5   7   9   -0.67   10.87
  -5   7   9   11.84   11.69
  -5   7   9   -1.57    9.91
  -5  -7  -9   22.26   13.27
   5   7   8   61.93   19.43
   5   7   8   53.57   17.86
  -5   7   8   48.91   18.03
  -5   7   8   59.12   16.91
  -5  -7  -8   50.85   19.33
   5   7   7    0.77   11.24
   5   7   7    7.58    9.96
  -5   7   7   -3.06   10.55
  -5   7   7    2.37    8.44
  -5  -7  -7   -9.43   11.74
   5  -7  -6   89.40   23.40
   5   7   6  104.71   24.34
  -5   7   6   70.12   24.69
  -5   7   6   35.09   23.20
   5   7   6   93.49   25.41
  -5  -7  -6  129.92   25.47
   5   7   5   15.51   11.56
   5   7   5    9.93    8.66
   5  -7  -5    6.74    3.94
   5  -7  -5   13.22    8.26
   5   7   5   13.79    9.48
  -5   7   5   26.06   11.19
  -5   7   5    4.42    7.97
   5   7   4    6.54   10.61
   5  -7  -4    1.30    2.95
   5   7   4    9.80    8.01
   5  -7  -4   -3.24    7.58
   5   7   4   -3.83    8.19
  -5   7   4   15.47   10.57
  -5   7   4    2.16    7.38
  -5  -7  -4    5.47   10.28
   5   7   3   17.23   10.48
   5  -7  -3   -0.64    3.56
   5  -7  -3    3.21    7.40
   5   7   3    4.96    8.14
  -5   7   3   -2.19   10.30
  -5   7   3    6.43    7.37
  -5  -7  -3    7.81   10.05
   5   7   2   76.26   17.82
   5  -7  -2   42.21   13.81
  -5  -7  -2   39.91   15.33
   5  -7  -2   33.37   15.10
   5   7   2   51.18   15.33
  -5   7   2   57.57   15.54
  -5  -7  -2   68.00   17.23
   5  -7  -1   47.34   12.33
   5   7   1   48.38   15.60
  -5  -7  -1   33.59   13.34
   5  -7  -1   33.01   13.34
   5   7   1   24.82   13.35
  -5   7   1   42.30   13.42
  -5  -7  -1   62.64   15.07
   5  -7   0   66.85   21.36
  -5  -7   0   54.91   21.88
   5  -7   0   49.69   21.86
   5   7   0   85.80   22.03
  -5   7   0   97.66   24.01
  -5   7   0   63.56   22.18
  -5  -7   0  106.12   23.09
   5   7   0  126.26   24.41
  -5  -7   1  213.75   41.60
  -5  -7   1  106.54   40.49
   5  -7   1  107.05   40.68
  -5   7  -1  167.81   42.07
   5   7  -1  124.17   40.52
  -5   7  -1  155.35   41.04
   5   7  -1  206.02   41.35
   5  -7   1  147.29   40.40
   5   7  -1  197.04   42.30
  -5  -7   2  369.35   64.72
  -5  -7   2  163.25   63.85
   5  -7   2  177.16   64.09
  -5   7  -2  319.39   65.50
   5   7  -2  190.13   63.94
   5   7  -2  299.93   64.41
  -5   7  -2  218.85   64.34
  -5  -7   3   23.27   12.12
   5  -7   3   20.26   12.65
  -5   7  -3   45.33   14.87
   5   7  -3   34.17   12.18
  -5   7  -3   25.96   13.10
  -5  -7   3   54.75   13.09
   5   7  -3   50.25   12.74
  -5  -7   4  302.63   64.43
  -5  -7   4  122.55   63.86
  -5   7  -4  318.85   65.70
   5   7  -4  286.51   64.31
   5   7  -4  205.15   64.10
  -5   7  -4  258.51   64.76
  -5  -7   5   36.13   19.83
  -5   7  -5   94.56   22.37
   5   7  -5   59.99   20.30
  -5   7  -5   85.94   21.62
  -5  -7   5   80.02   20.26
  -5  -7   6  299.83   67.11
  -5  -7   6  168.68   67.01
  -5   7  -6  298.40   68.48
   5   7  -6  230.06   67.24
  -5   7  -6  273.40   67.91
  -5  -7   7   39.37   12.10
  -5   7  -7   44.42   15.43
   5   7  -7   43.10   13.46
  -5   7  -7   32.06   14.71
  -5   7  -8   83.80   27.64
  -5   7  -8  121.23   28.37
   5   7  -8   88.53   26.52
   5   7  -9    7.95   12.64
   5   7  -9   13.39    9.30
  -5   7  -9    9.09   11.03
  -5   7  -9   10.85   11.32
  -5   7 -10   22.23   12.19
   5   7 -10   26.59   14.33
  -5   7 -10    7.68   12.92
   5   7 -10   26.44   11.11
   5   7 -11   29.34   10.92
   5   7 -11   -1.91   12.81
  -5   7 -11   24.07   12.19
  -5   7 -11   -0.81   12.85
  -5   7 -12   -3.45   12.88
   5   7 -12   -1.20   10.37
  -5   7 -12    7.87   11.87
   5   7 -12   -5.95   13.43
  -5   7 -13   -2.74   13.75
   5   7 -13   -7.70   10.82
  -5   7 -13   -2.39   12.21
   5   7 -13  -10.31   13.80
  -5   7 -14   26.07   16.12
  -5   7 -14   22.60   14.36
   5   7 -14   10.74   16.18
  -5   7 -15   26.49   16.91
  -5   7 -15   17.14   13.83
  -6  -7 -13    7.68   15.90
   6   7  13   36.21   15.59
  -6   7  13    0.92   14.50
   6   7  13   52.88   17.96
   6   7  12   10.24   15.22
   6   7  12   -0.81   13.00
  -6   7  12    4.52   12.38
   6   7  11   10.91   14.86
   6   7  11   15.24   12.86
  -6   7  11    6.25   12.60
   6   7  10    5.78   14.56
   6   7  10   11.42   11.31
  -6   7  10   -1.77   11.78
  -6  -7 -10    6.90   13.41
   6   7   9   18.72   14.75
   6   7   9    5.34   11.72
  -6   7   9   11.35   12.24
  -6   7   9    4.82    9.33
  -6  -7  -9   46.52   14.98
   6   7   8  -13.68   13.76
   6   7   8   10.59   10.52
  -6   7   8    6.91   11.63
  -6   7   8   -1.83    8.35
  -6  -7  -8   12.79   12.44
   6   7   7  125.56   30.79
   6   7   7  114.38   28.82
  -6   7   7   88.05   29.57
  -6   7   7   55.71   27.53
  -6  -7  -7  162.56   30.91
   6   7   6   20.94   14.62
   6   7   6   24.32   11.47
  -6   7   6   29.66   13.98
  -6   7   6   16.50   10.27
  -6  -7  -6   31.22   14.24
  -6  -7  -5  362.65   59.60
  -6   7   5  233.00   59.08
   6   7   5  218.67   57.86
  -6   7   5  138.95   57.22
   6   7   5  204.72   59.15
   6   7   4   -5.91   12.63
   6   7   4    6.08    8.52
  -6   7   4   -5.01   11.81
  -6   7   4    1.63    7.21
  -6  -7  -4    9.31   11.60
  -6  -7  -3  355.68   57.94
  -6   7   3  242.12   57.84
   6   7   3  145.06   56.07
  -6   7   3  153.58   55.95
   6   7   3  272.36   58.06
   6   7   2    2.49   11.86
   6  -7  -2   -1.99    6.09
   6   7   2    1.63    7.25
  -6   7   2    9.95   11.89
  -6   7   2   12.34    7.75
  -6  -7  -2   -0.71   10.42
  -6  -7  -1  225.96   37.63
   6   7   1  107.53   35.57
  -6   7   1  118.47   35.87
   6  -7  -1  121.50   35.40
   6  -7   0    8.09    7.14
   6   7   0    5.44    7.04
  -6  -7   0   14.16   10.40
  -6   7   0    8.73    8.13
   6   7  -1   65.14   28.47
  -6   7  -1  129.40   31.40
  -6   7  -1   83.94   29.02
   6  -7   1  100.36   28.83
   6   7  -2    7.80    6.78
  -6  -7   2    5.19    8.70
  -6   7  -2    0.83   11.05
  -6   7  -2   -7.68    8.53
   6  -7   2   -9.85    7.90
  -6  -7   3   36.91   10.82
   6   7  -3   14.14    8.49
  -6   7  -3   19.23   13.01
  -6   7  -3   14.73    9.76
   6  -7   3    8.92    9.51
  -6  -7   4   10.65    8.63
  -6   7  -4    3.36   11.15
   6   7  -4   -8.50    7.13
  -6   7  -4  -17.24    9.06
   6   7  -5   -2.64   12.92
  -6  -7   5   12.68    8.70
  -6   7  -5    9.33   12.27
  -6   7  -5    3.44    9.54
   6   7  -6   14.39   11.66
  -6  -7   6    6.87    8.05
  -6   7  -6    6.84   11.91
  -6   7  -6   -3.66   10.27
   6   7  -7   88.56   29.36
  -6   7  -7  100.18   28.76
  -6   7  -7  102.52   28.09
   6   7  -8   13.27   13.68
  -6   7  -8    6.11   13.12
  -6   7  -8   17.96   11.75
  -6   7  -9  152.79   41.20
   6   7  -9  124.92   41.76
  -6   7  -9  168.74   41.96
  -6   7 -10   70.22   22.71
  -6   7 -10   78.71   23.37
   6   7 -10   59.38   23.71
  -6   7 -11   82.74   24.88
  -6   7 -11   91.49   25.53
   6   7 -11   49.88   25.31
  -6   7 -12   35.94   15.51
  -6   7 -12   11.93   14.33
   6   7 -12   17.19   16.49
  -6   7 -13   93.70   27.63
  -6   7 -13   95.67   27.44
   6   7 -13   58.93   27.92
   7   7  11    2.23   16.36
  -7   7  11    1.96   13.91
  -7  -7 -11   -4.51   16.65
   7   7  10  106.32   31.12
  -7   7  10   54.45   29.10
  -7  -7 -10  135.11   31.13
   7   7   9    9.53   16.25
  -7   7   9  -10.63   13.92
  -7  -7  -9    4.21   14.56
   7   7   8  117.00   28.14
  -7   7   8   38.40   25.76
  -7  -7  -8  107.79   27.53
   7   7   7   -3.04   15.25
  -7   7   7   -2.86   13.17
  -7  -7  -7  -27.48   14.89
   7   7   6   27.89   15.26
  -7   7   6   19.01   14.32
  -7  -7  -6   12.30   14.17
  -7   7   5   20.83   13.05
  -7  -7  -5   -3.65   13.62
  -7   7   4   -7.56   13.07
  -7  -7  -4    5.27   12.87
  -7   7   3    3.77   13.25
  -7  -7  -3  -18.57   13.11
  -7  -7  -2   24.29   13.26
  -7   7   2   15.09   14.60
  -7  -7  -1   -5.44   11.92
  -7   7   1  -11.33   13.11
  -7  -7   0  150.84   41.07
  -7  -7   1   -3.55   11.70
  -7  -7   2  311.85   68.83
  -7   7  -2  246.19   69.52
   7   7  -2  203.54   69.36
   7  -7   3   -4.37    9.80
   7   7  -3    7.71   13.12
  -7  -7   3   -5.12   10.55
  -7   7  -3    3.84   12.41
  -7   7  -3   19.19    9.49
  -7  -7   4  204.63   39.67
   7   7  -4  110.27   40.35
  -7   7  -4  130.17   38.95
  -7   7  -4  155.64   41.13
   7  -7   4  112.59   39.02
   7   7  -5   14.85   14.95
  -7  -7   5   26.59   11.19
  -7   7  -5   24.36   14.27
  -7   7  -5   18.05   11.24
   7  -7   5    0.63   11.96
   7   7  -6   63.50   26.12
  -7   7  -6   94.42   25.95
  -7   7  -6   82.74   24.16
  -7   7  -7    1.29   11.16
   7   7  -7   10.28   13.56
  -7   7  -7  -15.90   13.92
  -7   7  -8   71.70   20.35
   7   7  -8   50.42   22.37
  -7   7  -8   57.25   22.10
  -7   7  -9  -12.49   12.71
   7   7  -9  -15.07   15.97
  -7   7  -9   -2.03   14.13
  -7   7 -10   12.51   15.00
  -7   7 -10   52.40   18.18
   7   7 -10   27.59   17.81
  -8   7   6   -6.37   14.31
  -8  -7  -6  -13.74   16.11
  -8  -7  -5  147.11   35.33
  -8   7   5   90.14   34.71
  -8  -7  -4   -0.99   14.75
  -8   7   4   -3.18   14.89
  -8  -7  -3  206.59   52.30
  -8   7   3  175.20   52.38
   8   7   2   21.56   17.82
  -8  -7  -2   44.04   16.36
  -8   7   2   14.89   16.15
   8   7   1  106.28   31.79
  -8  -7  -1  128.06   30.61
  -8   7   1   69.36   30.62
   8   7   0   -1.07   15.40
  -8  -7   0  -11.03   14.41
  -8   7   0  -28.94   16.17
   8   7  -1   37.56   22.58
  -8  -7   1   80.58   21.77
   8   7  -2   -1.08   16.16
  -8  -7   2   28.81   13.73
   8   7  -3    8.68   15.38
  -8  -7   3   23.75   13.74
  -8   7  -3   27.26   15.92
   8   7  -4  -19.69   15.90
  -8   7  -4   -9.89   15.62
   8   7  -5   -1.11   15.01
  -8   7  -5   -1.11   14.68
   0  -8 -18  107.97   32.73
   0   8  18  118.50   34.57
   0  -8 -17   -3.66   11.69
   0   8  17  -14.20   14.91
   0  -8 -16   63.45   22.84
   0   8  16   83.67   24.67
   0  -8 -15  -11.02   10.84
   0   8  15   -8.21   14.10
   0  -8 -14   -4.07   11.42
   0   8  14   41.46   14.41
   0  -8 -13   -2.34    9.73
   0   8  13  -22.07   13.06
   0  -8 -12    0.75    9.57
   0   8  12  -14.70   11.87
   0  -8 -11    5.74    9.05
   0   8  11    2.20   11.24
   0  -8 -10   52.77   20.68
   0   8  10   90.11   22.07
   0  -8  -9  -12.43    9.23
   0   8   9   -5.78    6.74
   0  -8  -8  146.03   41.54
   0   8   8  163.48   40.75
   0   8   7    2.12    5.37
   0   8   6  298.66   76.27
   0   8   5    3.21    4.90
   0  -8  -5  -15.59    7.85
   0   8   5    1.97    6.77
   0  -8  -5    2.98    7.84
   0   8   4  480.59  141.95
   0  -8  -4  549.56  142.10
   0   8   4  583.47  141.57
   0   8   3   -0.22    4.61
   0  -8  -3   -4.35    6.47
   0   8   3   -6.69    6.28
   0   8   2  345.70   82.84
   0   8   2  311.30   83.22
   0  -8  -2  290.87   82.78
   0  -8  -2  341.86   83.35
   0  -8  -1   -1.44    4.57
   0   8   1   -4.50    4.91
   0   8   1    0.40    5.82
   0  -8  -1   -1.30    5.78
   0  -8   0   35.45    9.93
   0   8   0   38.25   10.05
   0   8   0   45.08   10.67
   0  -8   0   16.80   10.24
   0  -8   1   -0.29    5.11
   0  -8   1    6.19    5.70
   0   8  -1   -3.01    5.83
   0   8  -1    2.17    5.26
   0   8  -1    8.45    7.47
   0   8  -2  116.64   22.68
   0   8  -2  127.95   23.61
   0   8  -2   89.37   22.41
   0  -8   2   80.29   22.33
   0  -8   3    6.58    5.99
   0   8  -3    8.48    6.54
   0   8  -3    5.19    7.54
   0   8  -3   -2.59    5.15
   0  -8   3   -1.03    5.39
   0  -8   4   16.32   10.38
   0   8  -4   34.13   10.92
   0   8  -4   34.73   10.29
   0  -8   4   38.79   11.70
   0   8  -4   31.13   11.41
   0   8  -4   34.11   10.03
   0  -8   5    4.56    6.46
   0   8  -5    0.30    5.36
   0  -8   5   -6.11    7.72
   0   8  -5   -3.91    7.96
   0   8  -5   -1.72    4.90
   0  -8   6   88.86   25.68
   0   8  -6   97.40   25.18
   0   8  -6  136.65   26.77
   0   8  -6   67.22   24.91
   0  -8   7    0.49    7.34
   0   8  -7    0.52    5.11
   0   8  -7   -8.58    8.59
   0   8  -7    4.98    4.67
   0   8  -8  486.33  120.57
   0   8  -8  667.35  121.93
   0   8  -8  368.37  120.43
   0   8  -9   -0.43    5.05
   0   8  -9    1.47    4.52
   0   8  -9    1.36    9.73
   0   8 -10  247.28   57.74
   0   8 -10  167.16   57.60
   0   8 -10  337.10   59.99
   0   8 -11   -2.76    3.79
   0   8 -11   -0.76   10.98
   0   8 -12  203.80   54.30
   0   8 -13  -13.57   12.46
   0   8 -14  208.64   55.93
   0   8 -15    7.56   13.20
   0   8 -16   19.92   15.18
   0   8 -17    4.20   14.16
   0   8 -18   36.39   18.40
  -1   8  18  -17.76   15.32
   1  -8 -18   13.00   12.38
  -1  -8 -18   18.61   12.87
  -1   8  17    8.93   14.71
   1  -8 -17   19.77   12.29
  -1  -8 -17   13.22   12.93
  -1   8  16  -22.60   14.21
   1  -8 -16    4.34   10.99
  -1  -8 -16   10.01   11.78
  -1   8  15  147.36   35.33
   1  -8 -15   91.27   34.10
  -1  -8 -15  130.29   34.41
  -1   8  14   19.46   13.06
   1  -8 -14    7.26   10.87
  -1  -8 -14  -12.59   11.35
  -1   8  13  315.73   60.19
  -1  -8 -13  208.34   59.19
   1  -8 -13  166.09   58.79
  -1   8  12   28.82   13.95
   1  -8 -12   26.10   12.55
  -1  -8 -12   26.17   13.10
   1  -8 -11  211.31   64.27
   1   8  11  302.98   65.08
  -1   8  11  287.96   65.01
  -1  -8 -11  192.71   64.32
   1   8  10    9.18   11.22
  -1   8  10    4.08   10.50
   1  -8 -10   14.43    9.35
  -1  -8 -10   -3.51    9.53
   1  -8  -9  176.53   59.87
   1   8   9  283.46   60.64
  -1   8   9  256.37   60.45
  -1  -8  -9  219.38   60.10
   1   8   9  226.36   59.61
   1   8   8   17.75   10.25
  -1   8   8    5.53    9.91
   1  -8  -8   21.46    9.20
  -1   8   8    6.55    5.32
   1   8   8    9.77    7.73
   1   8   7   79.02   19.27
   1   8   7   77.67   20.42
  -1   8   7  102.42   20.71
   1  -8  -7   54.40   19.81
  -1   8   7   57.37   17.77
   1   8   6    3.49    6.72
  -1   8   6    3.55    2.90
   1   8   6   -1.15    8.66
  -1   8   6    2.24    8.53
  -1  -8  -6   -2.29    7.82
   1   8   5   -0.34    6.03
  -1   8   5   -2.96    2.25
  -1  -8  -5    9.53    7.86
   1  -8  -5   -2.47    7.86
   1   8   5    3.84    8.06
  -1   8   5   18.33    8.54
  -1   8   5   12.64    7.33
  -1  -8  -5    8.14    7.63
   1   8   5   -3.47    7.47
   1   8   4   11.29    7.69
   1   8   4    7.54    6.79
  -1   8   4   10.04    3.74
  -1  -8  -4    0.48    7.81
   1  -8  -4   14.83    8.36
   1   8   4   11.62    8.52
  -1   8   4   25.57    8.87
  -1   8   4   18.44    7.70
  -1  -8  -4   15.37    7.79
   1  -8  -4   15.37    7.80
   1   8   3   21.37    8.98
   1   8   3   21.50    8.30
   1  -8  -3   11.67    8.96
  -1   8   3   15.62    6.16
  -1  -8  -3   24.41    9.53
   1  -8  -3   16.37    9.36
   1   8   3   41.94   10.13
  -1   8   3   32.07    9.95
  -1   8   3   17.71    8.92
  -1  -8  -3   44.91    9.46
   1   8   2   12.61    6.07
   1   8   2    4.62    5.83
  -1   8   2    0.67    2.90
  -1  -8  -2    3.67    6.96
   1  -8  -2   13.81    7.22
   1   8   2    1.50    7.13
   1  -8  -2   -5.35    6.84
  -1   8   2   -5.51    7.32
  -1   8   2   -2.24    6.31
  -1  -8  -2    4.08    6.41
   1  -8  -2    1.30    3.01
  -1  -8  -2    2.81    5.68
  -1  -8  -1  131.64   37.73
   1  -8  -1  139.03   37.71
   1   8   1   82.72   37.14
   1   8   1  194.10   38.11
  -1   8   1  184.00   38.05
  -1   8   1  139.47   37.54
  -1  -8  -1  177.80   37.66
  -1  -8  -1  146.95   37.33
   1  -8  -1  141.17   36.75
   1  -8  -1   31.67   37.21
   1   8   1  185.99   37.49
  -1   8   0   77.01   16.34
  -1  -8   0   58.22   15.95
   1  -8   0   47.83   15.17
  -1  -8   0   73.09   16.29
   1   8   0   48.00   16.09
   1   8   0   36.02   15.70
   1   8   0   98.18   17.15
  -1  -8   0   56.69   16.57
   1  -8   0   75.61   16.76
   1  -8   0    7.59   15.89
  -1   8   0   66.79   16.85
   1   8  -1  348.44   70.35
  -1  -8   1  280.88   70.50
   1  -8   1  291.94   70.53
   1   8  -1  139.07   69.77
   1   8  -1  386.48   70.80
  -1   8  -1  405.13   70.90
   1  -8   1   30.01   69.67
  -1   8  -1  315.08   70.33
  -1  -8   1  333.20   70.29
  -1  -8   1  295.93   70.17
   1  -8   1  279.27   69.82
  -1  -8   2    4.49    6.30
   1  -8   2   -2.15    5.39
   1   8  -2   12.82    6.85
   1   8  -2    4.19    5.40
  -1   8  -2    5.77    6.10
  -1   8  -2   17.72    6.80
  -1  -8   2   11.95    5.85
  -1  -8   2    5.03    7.08
   1  -8   2    0.95    7.12
   1   8  -2    1.99    7.00
  -1   8  -2   17.00    8.18
   1  -8   3  453.96  112.34
   1   8  -3  508.74  112.71
  -1  -8   3  415.34  112.34
  -1   8  -3  569.90  112.72
  -1  -8   3  394.75  112.69
   1   8  -3  174.18  111.97
   1  -8   3  453.93  112.82
   1   8  -3  612.84  113.09
  -1   8  -3  468.33  112.51
  -1  -8   3  413.19  112.52
  -1  -8   4   44.01   12.40
   1   8  -4   19.01   10.90
   1  -8   4   52.39   11.95
   1   8  -4   47.98   12.74
  -1  -8   4   28.78   11.26
  -1   8  -4   41.63   11.70
  -1   8  -4   48.98   12.31
  -1  -8   4   37.52   12.76
   1  -8   4   37.15   12.85
   1   8  -4   40.91   12.80
   1  -8   5  228.57   48.02
   1   8  -5  273.44   48.69
  -1   8  -5  293.54   48.18
   1   8  -5  108.79   47.24
  -1  -8   5  230.63   48.55
  -1  -8   5   27.83   47.17
   1   8  -5  325.14   49.01
  -1  -8   5  206.77   48.20
  -1   8  -5  230.82   47.88
  -1  -8   6   35.26   10.65
   1  -8   6   16.24    9.60
   1   8  -6   15.29    8.02
   1   8  -6   21.89   10.92
   1   8  -6   26.39    8.37
  -1   8  -6   37.20    9.70
  -1   8  -6   29.00    8.99
   1   8  -6   29.57   11.22
   1  -8   7  147.06   31.26
  -1   8  -7  104.49   30.48
   1   8  -7  142.27   31.76
   1   8  -7   63.78   29.84
   1   8  -7  119.02   30.05
  -1   8  -7  161.87   30.86
   1   8  -7  141.33   31.89
   1   8  -8    6.31    3.27
  -1   8  -8   -8.75    6.37
  -1   8  -8   -0.96    5.53
   1   8  -8    1.88    8.78
   1   8  -8    0.29    3.10
  -1   8  -9   76.23    9.41
  -1   8  -9  103.12   10.45
   1   8  -9  115.71   14.02
  -1   8 -10   19.89    8.05
   1   8 -10    4.89   11.67
  -1   8 -10   26.27    8.37
  -1   8 -11   -3.37    6.13
   1   8 -11    0.74   10.62
  -1   8 -12    5.31    6.25
   1   8 -12   12.48   11.32
  -1   8 -13   32.24   15.63
   1   8 -14    2.61   12.62
  -1   8 -14   -9.20   13.44
   1   8 -15   87.29   27.43
  -1   8 -15   88.28   27.96
   1   8 -16   15.50   14.35
  -1   8 -16    3.07   14.42
  -1   8 -17   74.27   26.33
  -1   8 -18   10.18   16.25
   1   8 -18  -18.25   16.37
   2  -8 -18   30.52   18.96
   2   8  18   77.68   22.81
  -2   8  18   60.19   21.50
  -2  -8 -18   47.16   20.49
   2  -8 -17   -4.49   11.89
   2   8  17   21.10   16.02
  -2   8  17   23.27   15.07
  -2  -8 -17    5.94   13.29
   2  -8 -16   15.67   13.68
   2   8  16   21.02   17.17
  -2   8  16   32.23   15.97
  -2  -8 -16   43.83   16.00
   2  -8 -15    4.21   10.29
   2   8  15   -6.65   13.82
  -2   8  15    5.24   12.91
  -2  -8 -15   -1.83   12.50
   2  -8 -14   22.81   13.21
   2   8  14   21.58   15.48
  -2   8  14   55.47   15.96
  -2  -8 -14   17.60   14.77
   2  -8 -13   11.81   10.42
   2   8  13   11.91   12.68
  -2   8  13    4.70   11.86
  -2  -8 -13    2.53   11.45
   2  -8 -12   -2.28    9.74
   2   8  12   -1.61   12.10
  -2   8  12    1.49   11.13
  -2  -8 -12    6.46   10.94
   2  -8 -11   -4.40    9.80
   2   8  11   19.79   12.00
  -2   8  11   17.61   11.57
  -2  -8 -11    6.17   10.96
   2   8  11   19.60   10.25
  -2   8  10   65.03   21.98
   2  -8 -10   39.60   23.84
   2   8  10  123.05   25.57
  -2   8  10  111.59   25.32
  -2  -8 -10  100.12   25.23
   2   8  10  121.58   24.76
  -2   8   9    5.98    2.75
   2   8   9   -0.68   10.52
   2  -8  -9   -0.68    8.76
  -2   8   9    3.81   10.03
  -2   8   9    3.59    3.16
   2   8   9    1.03    9.08
   2   8   8  354.71   65.97
  -2   8   8  302.86   65.66
   2   8   8  286.14   65.25
   2   8   7  127.89   28.87
  -2   8   7  135.19   28.83
  -2  -8  -7  121.07   28.68
   2  -8  -7   24.09   27.54
   2   8   7  112.88   28.10
   2  -8  -6  325.01   92.51
   2   8   6  481.77   93.06
  -2   8   6  420.22   92.88
  -2  -8  -6  468.64   93.02
   2   8   6  419.37   92.59
  -2  -8  -5  112.64   37.03
   2  -8  -5  116.26   36.87
   2   8   5  152.18   37.37
  -2   8   5  141.26   37.15
  -2  -8  -5  148.93   37.21
   2   8   5  141.13   36.82
   2   8   4  541.44  126.52
   2   8   4  489.66  126.54
  -2  -8  -4  371.36  126.39
   2  -8  -4  408.11  126.41
   2   8   4  530.38  126.67
  -2   8   4  482.00  126.60
  -2  -8  -4  551.94  126.71
   2   8   3  134.17   34.74
  -2  -8  -3  124.63   34.79
   2  -8  -3  109.04   34.59
   2   8   3  157.23   34.99
  -2   8   3  153.24   35.00
  -2  -8  -3  176.61   35.07
   2  -8  -3   22.63   34.26
  -2   8   3  120.98   34.69
   2   8   3  161.11   34.76
   2   8   2  386.76   89.46
  -2  -8  -2  317.25   89.47
   2  -8  -2  302.23   89.43
   2   8   2  482.93   89.82
   2  -8  -2   16.57   88.75
  -2   8   2  411.47   89.73
  -2  -8  -2  483.57   89.74
  -2   8   2  342.59   89.47
  -2  -8  -2  322.21   89.29
   2   8   2  455.97   89.64
  -2  -8  -1   42.44   10.91
   2   8   1   53.01   11.29
  -2   8   1   26.97   11.03
  -2   8   1   39.49   10.86
  -2  -8  -1   28.43   10.95
   2  -8  -1   15.23   10.72
   2   8   1   36.72   11.29
   2  -8  -1   25.91    8.05
  -2   8   1   37.62   11.36
  -2  -8  -1   41.55   10.98
   2   8   1   19.30   10.44
   2   8   0  235.04   60.80
  -2   8   0  269.19   61.18
  -2  -8   0  174.34   60.89
   2  -8   0  227.46   61.09
   2   8   0  306.22   61.32
  -2   8   0  277.14   61.28
  -2  -8   0  303.23   61.04
  -2  -8   0  207.95   60.86
  -2   8   0  222.09   60.92
   2  -8   0  170.90   60.10
   2   8   0  262.34   61.05
  -2  -8   1   39.25   14.33
   2   8  -1   52.06   14.45
  -2   8  -1   47.15   14.68
  -2  -8   1   39.77   14.40
   2  -8   1   48.54   14.66
   2   8  -1   51.83   14.65
   2  -8   1   42.83   12.91
  -2   8  -1   58.84   14.38
  -2   8  -1   54.88   14.91
   2   8  -1   50.20   13.99
  -2  -8   1   40.22   13.81
  -2  -8   2   26.17   10.60
   2   8  -2   32.17   10.72
   2  -8   2   32.78    9.27
  -2   8  -2   44.60   11.34
  -2  -8   2   13.53   10.55
   2  -8   2   26.02   10.79
   2   8  -2   33.73   10.93
   2   8  -2   21.31    9.71
  -2   8  -2   37.31   11.30
  -2   8  -2   30.11   10.51
  -2  -8   2   22.94    9.73
  -2  -8   3    8.18    5.64
  -2  -8   3    6.03    7.42
   2   8  -3   -1.51    7.31
   2  -8   3   11.29    5.43
  -2   8  -3    0.47    6.91
  -2  -8   3   -0.46    7.06
   2  -8   3    7.94    7.40
   2   8  -3    2.39    5.61
   2   8  -3    6.98    7.47
  -2   8  -3    7.59    7.93
  -2   8  -3   -5.65    6.73
  -2  -8   4   34.07   12.17
  -2   8  -4   27.75   11.59
   2   8  -4   36.09   12.66
   2  -8   4   39.67   11.19
  -2  -8   4   39.49   10.78
  -2   8  -4   37.31   12.10
  -2  -8   4   18.37   12.14
   2   8  -4   30.74   10.64
   2   8  -4   38.43   12.58
  -2   8  -4   44.51   12.92
   2   8  -5    9.53    8.95
   2  -8   5   20.34    7.81
  -2   8  -5   13.47    7.60
   2   8  -5   11.19    6.34
  -2  -8   5    9.74    8.46
  -2  -8   5   10.92    6.02
  -2   8  -5   11.78    8.16
   2   8  -5   26.53    9.29
  -2   8  -5   22.35    9.60
   2  -8   6  108.78   21.85
   2   8  -6  105.15   22.80
  -2  -8   6   27.65   20.28
  -2   8  -6  141.33   22.32
   2   8  -6  111.73   22.63
  -2   8  -6   29.12   21.19
  -2   8  -6  102.36   22.76
   2   8  -6   84.10   20.57
   2   8  -7   11.34    9.79
   2  -8   7   25.50    8.68
   2   8  -7   13.17    4.99
  -2   8  -7   19.46    8.54
   2   8  -7    8.11    9.62
  -2   8  -7   14.91    9.97
  -2   8  -7   -0.41    7.61
  -2   8  -8   24.55   11.72
   2   8  -8   78.18   14.63
   2   8  -8   33.52    9.03
  -2   8  -8  120.51   13.28
   2   8  -8   24.78    8.94
   2   8  -8   86.44   14.27
  -2   8  -8  101.76   15.37
   2   8  -9   43.26   15.93
  -2   8  -9    8.14   13.15
  -2   8  -9   50.45   13.92
   2   8  -9   49.39   15.52
  -2   8  -9   58.36   16.39
  -2   8 -10  247.71   49.71
   2   8 -10  234.95   50.59
  -2   8 -10  233.50   51.04
   2   8 -11   52.20   19.92
  -2   8 -11   59.42   20.57
  -2   8 -11   69.15   18.24
  -2   8 -12  204.39   53.69
   2   8 -12  210.95   54.95
  -2   8 -12  206.87   55.37
  -2   8 -13   23.28    9.67
   2   8 -13   15.98   12.93
  -2   8 -13    9.85   13.95
   2   8 -14  113.95   34.13
  -2   8 -14  126.52   35.21
   2   8 -15    1.78   13.11
  -2   8 -15    3.98   14.02
   2   8 -16   34.76   17.05
   2   8 -17   -3.96   14.38
   3   8  17   44.06   18.27
  -3   8  17   41.53   16.43
  -3  -8 -17   31.42   15.99
   3  -8 -17  -17.32   13.71
   3   8  16   41.84   17.27
  -3   8  16   14.35   15.79
   3  -8 -16   -4.44   12.34
  -3  -8 -16   48.47   16.16
   3   8  15   74.49   18.88
  -3   8  15   27.23   17.80
   3  -8 -15   10.36   15.07
  -3  -8 -15   57.38   18.08
   3   8  14   65.09   17.51
  -3   8  14   19.37   15.36
   3  -8 -14    0.84   13.13
  -3  -8 -14   45.78   15.81
   3   8  13  102.39   24.75
  -3   8  13   97.92   23.65
  -3  -8 -13  103.20   24.26
  -3  -8 -12   34.41   15.22
  -3   8  12   49.34   14.82
   3  -8 -12    6.33   13.35
   3   8  12   44.69   15.22
  -3  -8 -11  137.49   30.13
   3   8  11  142.79   30.31
  -3   8  11  115.69   29.52
   3   8  11  115.74   29.47
   3   8  10   98.26   21.56
  -3   8  10   69.33   20.62
   3   8  10   99.64   21.16
   3   8   9  123.43   30.38
   3   8   9  159.50   31.05
  -3   8   9  147.55   30.48
   3   8   8  102.57   24.99
  -3  -8  -8  124.63   25.58
   3   8   8   89.87   25.12
  -3   8   8  111.08   24.91
   3   8   7   46.06   14.18
  -3  -8  -7   49.75   14.84
   3   8   7   60.26   14.63
  -3   8   7   30.15   13.62
   3  -8  -7    4.09   12.93
   3   8   6   27.38   10.60
  -3  -8  -6   12.30   10.85
   3  -8  -6   11.56    9.91
   3   8   6   29.49   11.27
  -3   8   6   10.41   10.07
   3   8   5    2.18    9.20
  -3  -8  -5   14.73    9.76
   3  -8  -5    7.31    8.44
   3   8   5   16.29    9.60
  -3   8   5   10.08    8.88
   3   8   4   -2.68    8.25
  -3  -8  -4    4.64    8.58
  -3  -8  -4   -3.94    8.20
   3  -8  -4   15.71    8.37
   3   8   4    1.61    8.40
  -3   8   4    3.10    7.76
   3   8   3  103.64   26.49
  -3  -8  -3   78.81   26.08
  -3   8   3   85.97   26.44
   3  -8  -3   80.61   26.15
  -3  -8  -3  123.10   26.57
   3   8   3  104.74   26.47
   3   8   3   88.78   26.37
  -3   8   3   87.53   26.22
   3   8   2   21.23   10.62
  -3  -8  -2   35.49   10.58
  -3  -8  -2   18.43   10.07
  -3   8   2   25.82   10.47
   3  -8  -2    8.84   10.00
   3   8   2   36.91   10.33
   3   8   2   18.48   10.15
  -3   8   2   24.74   10.47
  -3  -8  -2   16.56   10.28
  -3   8   1  227.21   19.92
  -3  -8  -1  162.05   18.35
   3  -8  -1  129.05   18.14
   3   8   1  192.98   18.87
  -3   8   1  197.22   19.02
  -3  -8  -1  262.90   19.46
   3   8   1  230.73   19.67
  -3  -8  -1  168.95   18.58
   3   8   1  186.55   18.39
  -3  -8   0   70.97   24.68
   3  -8   0   68.77   23.04
  -3   8   0  126.03   25.24
  -3  -8   0   86.53   24.58
   3   8   0   75.88   24.26
  -3   8   0  102.23   24.84
  -3  -8   0  119.33   24.71
   3  -8   0   73.39   24.43
   3   8   0   86.38   24.54
   3   8   0  118.10   25.13
   3  -8   1  145.47   39.35
  -3   8  -1  170.13   40.59
  -3  -8   1  114.83   40.12
   3  -8   1  107.83   40.22
   3   8  -1  140.37   40.29
  -3   8  -1  142.35   40.41
  -3  -8   1  210.95   40.34
   3   8  -1  162.53   40.07
  -3  -8   1  128.59   40.41
   3   8  -1  148.37   40.68
   3   8  -2  179.88   48.85
   3  -8   2  177.65   47.85
  -3   8  -2  242.65   49.09
  -3  -8   2  127.37   48.34
   3  -8   2  121.45   48.47
   3   8  -2  144.43   48.42
  -3   8  -2  211.71   48.96
  -3  -8   2  224.51   48.40
   3   8  -2  185.51   48.27
   3   8  -3  262.42   79.44
   3  -8   3  296.44   78.81
  -3   8  -3  369.45   79.70
  -3  -8   3  207.47   79.07
   3   8  -3  315.98   79.35
  -3   8  -3  341.69   79.68
  -3  -8   3  337.70   79.03
   3   8  -3  287.81   78.89
   3   8  -4   99.08   24.90
  -3   8  -4   25.74   23.85
   3  -8   4   84.10   23.55
   3   8  -4   72.05   23.29
  -3   8  -4  122.87   24.81
  -3  -8   4   71.39   24.07
  -3  -8   4   95.19   23.41
   3   8  -4   95.78   24.23
  -3   8  -4   85.44   24.75
   3   8  -5  283.75   66.28
   3  -8   5  279.89   65.53
  -3   8  -5  303.41   66.13
  -3  -8   5  188.96   65.59
   3   8  -5  250.90   65.89
  -3   8  -5  303.50   66.39
  -3   8  -5   51.26   65.21
  -3  -8   5  263.06   65.13
   3   8  -5  259.86   65.12
   3   8  -6   43.08   13.49
  -3  -8   6   46.37   13.28
   3   8  -6   56.03   16.56
   3  -8   6   61.95   15.01
  -3  -8   6   26.11   14.83
  -3   8  -6   54.58   15.79
   3   8  -6   57.31   15.70
  -3   8  -6   42.43   16.17
  -3  -8   7  174.85   64.72
   3   8  -7  323.75   66.74
   3  -8   7  373.23   66.11
  -3   8  -7  385.88   66.47
   3   8  -7  238.90   64.76
   3   8  -7  314.67   66.23
  -3   8  -7  409.68   67.07
   3   8  -8   55.07   12.94
  -3   8  -8   76.87   11.78
   3   8  -8   44.68   11.60
  -3   8  -8   75.81   13.63
   3   8  -9    6.17   11.06
  -3   8  -9   21.30   10.00
   3   8  -9    9.91    9.71
  -3   8  -9   11.85   11.45
   3   8 -10    4.06   11.04
   3   8 -10   -1.96    9.98
  -3   8 -10   17.98   11.67
  -3   8 -10  -20.26    9.45
   3   8 -11    2.56   11.90
  -3   8 -11    0.83   11.31
   3   8 -11  -10.35   10.82
  -3   8 -11   -7.69    9.05
  -3   8 -12   24.82   10.18
   3   8 -12   10.94   11.60
  -3   8 -12   -1.74   13.21
  -3   8 -13    8.30    9.17
   3   8 -13  -14.64   11.83
  -3   8 -13   -0.92   13.53
   3   8 -14    3.26   12.45
  -3   8 -14   18.40   14.78
  -3   8 -15   41.82   18.22
   3   8 -15   32.67   16.71
  -3   8 -16   -6.44   15.73
   3   8 -16   14.50   13.96
  -4   8  16   25.74   14.51
   4   8  16   29.05   17.49
  -4  -8 -16   53.99   17.52
  -4   8  16    4.33   15.59
  -4   8  15   12.57   14.67
  -4  -8 -15   55.19   17.93
   4   8  15   41.35   18.41
  -4   8  15   27.97   16.28
   4   8  15   41.50   18.19
  -4   8  14   19.32   11.60
  -4  -8 -14   -7.02   14.11
   4   8  14   13.99   13.51
  -4   8  14    7.03   12.56
   4   8  14   19.45   14.77
  -4  -8 -13   20.26   14.06
  -4   8  13   14.57   11.38
   4   8  13   -4.41   13.17
  -4   8  13   -2.22   11.78
   4   8  13   33.08   14.81
  -4  -8 -12   21.32   12.86
  -4   8  12    0.84   10.74
   4   8  12   -7.51   12.32
  -4   8  12    2.11   11.12
   4   8  12    4.89   12.53
  -4   8  11   15.52   11.20
   4   8  11   24.47   12.98
  -4   8  11   -5.35   10.61
   4   8  11   14.88   12.73
   4   8  10   -3.77   11.28
  -4   8  10    4.78   10.01
   4   8  10   -3.73   11.49
  -4   8  10    5.72   10.39
   4   8   9   95.47   25.26
  -4  -8  -9  109.40   25.47
  -4   8   9   62.32   24.32
   4   8   9   90.16   24.58
  -4   8   9   61.85   23.91
   4   8   8   51.49   17.38
  -4  -8  -8   77.24   18.18
  -4   8   8   31.98   16.46
   4   8   8   34.61   16.94
  -4   8   8   51.61   16.34
   4   8   7   49.36   16.74
  -4  -8  -7   73.00   17.52
  -4   8   7   47.68   16.02
   4   8   7   39.65   16.27
  -4   8   7   28.42   15.35
   4   8   6  129.74   33.86
  -4  -8  -6  165.40   34.20
  -4   8   6  114.50   33.73
   4   8   6  112.63   33.39
  -4   8   6   94.71   33.04
   4   8   5   78.65   23.56
  -4  -8  -5  106.03   23.91
   4  -8  -5   55.99   22.40
  -4   8   5   77.27   23.38
   4   8   5   86.01   23.08
  -4   8   5   66.44   22.64
  -4  -8  -4  137.38   37.55
   4   8   4  141.25   37.68
  -4  -8  -4  195.59   38.51
  -4   8   4  117.29   37.43
   4  -8  -4   91.82   37.19
   4   8   4  150.44   38.15
  -4  -8  -3  139.07   50.72
   4  -8  -3  130.95   50.63
  -4  -8  -3  256.38   51.61
   4   8   3  181.68   50.92
  -4   8   3  191.34   51.07
   4   8   3  243.13   51.88
   4   8   2   77.78   19.77
  -4  -8  -2  103.24   19.48
  -4  -8  -2   43.69   18.40
   4  -8  -2   48.97   18.52
  -4   8   2   42.90   19.42
   4   8   2   68.11   18.71
  -4   8   2   42.90   18.44
   4  -8  -1  114.93   29.67
  -4  -8  -1  125.25   31.36
  -4   8   1  174.86   32.55
  -4  -8  -1  218.76   32.36
   4   8   1  132.23   31.52
  -4   8   1  162.53   31.80
   4  -8  -1   94.73   31.21
   4   8   1  181.15   31.88
   4  -8  -1   79.89   29.67
   4   8   1  166.12   32.40
   4   8   0   48.32   18.37
  -4  -8   0   89.62   17.99
   4   8   0   73.42   17.53
  -4  -8   0   57.44   17.23
   4  -8   0   47.57   17.38
  -4   8   0   51.23   18.43
   4   8   0   58.11   17.26
  -4   8   0   58.26   17.49
   4  -8   0   50.66   15.49
   4   8  -1   63.39   17.04
   4   8  -1   37.69   15.32
  -4  -8   1   57.60   15.92
  -4  -8   1   36.47   15.30
   4  -8   1   48.12   15.99
  -4   8  -1   57.39   16.98
   4   8  -1   52.34   15.74
  -4   8  -1   48.06   16.23
   4   8  -2   25.32   12.00
   4   8  -2   32.64    9.99
  -4  -8   2   28.40   10.41
  -4  -8   2    3.04    9.83
   4  -8   2   12.01   10.56
  -4   8  -2   24.26   11.79
   4   8  -2   26.15   10.34
  -4   8  -2   38.67   11.57
   4   8  -3    8.27    6.97
   4   8  -3   -5.46    9.59
  -4  -8   3    6.41    7.00
  -4  -8   3   -8.76    7.59
  -4   8  -3    1.96    9.44
   4   8  -3    8.02    7.81
  -4   8  -3    2.26    9.01
   4   8  -4   22.92   10.67
   4   8  -4   29.49   13.33
  -4  -8   4   39.81   10.82
  -4  -8   4   36.62   11.71
  -4   8  -4   31.27   12.94
   4   8  -4   22.13   11.66
  -4   8  -4   38.33   12.88
   4   8  -5   63.09   19.21
  -4  -8   5   63.11   16.90
  -4  -8   5   34.44   17.29
  -4   8  -5   60.56   18.93
   4   8  -5   54.98   17.88
  -4   8  -5   70.41   18.96
   4   8  -5   60.03   16.70
   4   8  -6    0.75   10.65
  -4  -8   6   16.64    8.27
  -4  -8   6    5.47    5.66
  -4   8  -6    1.96    9.60
   4   8  -6    2.57    8.34
  -4   8  -6   -2.60    9.76
   4   8  -7   39.78   20.02
  -4  -8   7   63.69   16.78
  -4   8  -7   64.80   19.51
   4   8  -7   60.03   18.71
  -4   8  -7   75.12   19.90
   4   8  -8   53.57   16.71
  -4   8  -8   36.18   15.33
   4   8  -8   23.61   14.18
  -4   8  -8   66.24   16.64
  -4   8  -9  133.66   37.52
   4   8  -9  147.27   37.41
  -4   8  -9  132.90   38.13
   4   8 -10   87.96   27.55
  -4   8 -10   86.59   28.43
  -4   8 -10  115.95   27.95
  -4   8 -11   66.45   23.60
   4   8 -11   85.04   23.79
  -4   8 -11   89.68   25.07
  -4   8 -12   99.39   26.44
   4   8 -12   91.95   26.73
  -4   8 -12   78.52   27.71
  -4   8 -13  145.67   39.69
   4   8 -13  127.42   39.66
  -4   8 -13  165.62   41.08
  -4   8 -14   31.71   18.37
   4   8 -14   42.00   16.88
  -4   8 -14   43.17   15.57
  -4   8 -15   53.20   23.13
   4   8 -15   69.78   21.54
  -5  -8 -15   21.32   16.37
   5   8  15    6.98   15.71
  -5   8  15    2.84   13.64
  -5   8  15    8.64   13.38
   5   8  15   41.23   17.07
  -5  -8 -14   68.27   24.22
   5   8  14   94.53   24.08
  -5   8  14   39.05   22.04
  -5   8  14   52.99   22.17
   5   8  14   93.39   24.89
  -5  -8 -13   50.19   18.94
   5   8  13   59.05   18.00
  -5   8  13   21.91   16.09
  -5   8  13   30.49   15.86
   5   8  13   41.23   18.75
   5   8  12   87.99   23.57
  -5   8  12   44.83   22.08
  -5   8  12   64.65   21.86
   5   8  12   88.00   24.62
   5   8  11   96.74   21.55
   5   8  11   64.76   19.79
  -5   8  11   36.98   19.26
  -5   8  11   35.88   18.31
   5   8  10  108.45   30.72
  -5  -8 -10  138.78   31.19
   5   8  10  114.74   30.29
  -5   8  10   67.44   29.76
  -5   8  10   93.96   29.19
   5   8   9   64.88   20.47
  -5  -8  -9   77.80   20.52
   5   8   9   71.88   19.10
  -5   8   9   37.37   19.06
  -5   8   9   36.14   17.79
   5   8   8  151.66   38.16
   5   8   8  159.79   37.38
  -5  -8  -8  194.73   38.46
  -5   8   8   96.87   37.30
  -5   8   8   92.20   36.28
  -5  -8  -7   51.79   15.59
   5   8   7   39.20   15.44
   5   8   7   41.17   13.53
  -5   8   7   23.02   13.83
  -5   8   7   11.84   12.26
  -5  -8  -6   54.25   19.87
   5   8   6   83.03   20.42
   5   8   6   70.01   19.40
  -5   8   6   71.27   20.37
  -5   8   6   39.64   18.28
   5   8   5   -1.54   11.72
   5  -8  -5   -3.31    8.52
   5   8   5   -9.62    9.42
  -5   8   5   -3.20   10.98
  -5   8   5   -1.53    8.60
  -5  -8  -5   -9.77   11.20
   5   8   4   14.44   10.88
   5  -8  -4    2.79    7.75
   5   8   4    4.83    8.41
  -5   8   4  -19.74   11.71
  -5   8   4    3.51    8.10
  -5  -8  -4   -6.45   10.35
   5   8   3   -2.26   10.45
  -5  -8  -3   -1.42    8.26
   5  -8  -3   -1.39    7.63
   5   8   3   -5.62    8.36
  -5   8   3    6.97    8.18
  -5  -8  -3   12.96   10.41
   5   8   2   34.49   12.03
   5  -8  -2    6.41    4.59
  -5  -8  -2   25.46    9.32
   5  -8  -2   10.19    8.81
   5   8   2   28.37    9.24
  -5   8   2    8.99    9.07
  -5  -8  -2   33.05   11.44
   5  -8  -1    6.73    4.83
   5   8   1    0.75   11.10
  -5  -8  -1   13.62    8.29
   5  -8  -1   14.05    8.42
  -5   8   1   11.52   10.68
   5   8   1    6.13    8.02
  -5   8   1   17.67    8.90
  -5  -8  -1   11.66   10.11
   5  -8   0   47.61   13.33
   5   8   0   45.94   16.88
  -5  -8   0   38.93   14.74
   5  -8   0   37.22   14.78
  -5   8   0   42.02   16.56
   5   8   0   39.42   14.63
  -5  -8   0   64.34   16.22
  -5   8   0   53.10   15.27
  -5  -8   1  182.99   39.19
  -5  -8   1  115.63   38.57
  -5   8  -1  204.70   40.33
   5   8  -1  119.25   38.53
  -5   8  -1  127.77   38.85
   5  -8   1  129.92   38.02
   5   8  -1  163.48   40.04
  -5  -8   2  275.40   54.69
  -5  -8   2  130.32   54.01
  -5   8  -2  269.63   55.67
   5   8  -2  162.13   54.14
  -5   8  -2  188.98   54.59
   5   8  -2  220.49   54.41
   5   8  -2  195.00   55.38
   5   8  -3   92.57   29.62
  -5  -8   3  138.44   28.62
  -5  -8   3   67.49   27.90
   5   8  -3  115.83   28.28
  -5   8  -3  123.79   29.84
   5   8  -3   71.27   28.12
  -5   8  -3  109.85   28.88
   5   8  -4  184.30   53.22
  -5  -8   4  115.25   51.81
  -5  -8   4  251.48   52.27
  -5   8  -4  261.65   53.70
   5   8  -4  156.05   52.05
  -5   8  -4  202.95   52.80
   5   8  -5   35.33   15.30
  -5  -8   5   36.48   11.34
  -5   8  -5   32.05   14.37
   5   8  -5   22.38   11.83
  -5   8  -5   33.30   13.44
  -5  -8   6  143.49   34.20
  -5   8  -6  148.80   35.64
  -5   8  -6  126.46   35.92
   5   8  -6   96.47   34.47
  -5  -8   7   -4.12    6.38
  -5   8  -7    1.54   10.67
   5   8  -7   -5.03    8.98
  -5   8  -7  -11.15   10.81
  -5   8  -8  115.63   27.71
   5   8  -8   72.66   26.20
  -5   8  -8   97.77   27.36
   5   8  -9   42.08   13.51
  -5   8  -9   43.04   15.45
  -5   8  -9   15.52   14.75
   5   8 -10   12.85   10.34
  -5   8 -10   15.56   12.73
  -5   8 -10    5.52   11.68
  -5   8 -11    9.56   12.58
   5   8 -11   16.67   11.56
  -5   8 -11   19.00   13.25
  -5   8 -12   16.40   13.73
  -5   8 -12   -6.43   12.06
   5   8 -12    4.16   14.01
   5   8 -12   -1.31   11.46
  -5   8 -13   26.88   15.02
  -5   8 -13   13.77   12.86
   5   8 -13   -9.72   16.28
  -5   8 -14   25.27   17.53
  -5   8 -14   31.04   15.56
   5   8 -14   42.66   19.45
   6   8  13   23.66   16.66
   6   8  13   11.70   14.51
  -6   8  13   -5.88   13.44
   6   8  12   10.44   15.19
   6   8  12    4.25   12.95
  -6   8  12  -16.46   13.87
   6   8  11   14.19   14.96
  -6  -8 -11   -6.36   15.21
   6   8  11    2.41   12.52
  -6   8  11   -3.82   12.75
  -6  -8 -10   25.55   14.93
   6   8  10   13.82   14.78
   6   8  10   -8.32   12.17
  -6   8  10    8.49   13.07
   6   8   9   20.21   15.88
   6   8   9   27.79   13.32
  -6   8   9    4.66   14.08
  -6  -8  -9   33.46   15.18
   6   8   8    0.94   14.45
   6   8   8   18.75   12.02
  -6   8   8    0.92   12.82
  -6   8   8   28.30   10.82
  -6  -8  -8   35.06   14.81
   6   8   7  115.92   24.84
   6   8   7   81.27   22.04
  -6   8   7   56.50   22.75
  -6   8   7   40.01   20.65
  -6  -8  -7   86.55   23.91
   6   8   6   18.98   14.71
   6   8   6    8.29   10.57
  -6   8   6    1.80   12.76
  -6   8   6   18.23    9.60
  -6  -8  -6   29.75   13.57
   6   8   5  169.09   38.02
   6   8   5  113.10   35.96
  -6   8   5  113.55   37.02
  -6   8   5   70.09   35.31
   6   8   4   31.66   15.74
   6   8   4   28.87   12.38
  -6   8   4   25.73   14.81
  -6   8   4   23.46   11.45
  -6  -8  -4   41.83   15.23
  -6  -8  -3  338.52   53.86
  -6   8   3  230.16   53.66
   6   8   3  143.75   51.75
  -6   8   3  105.26   51.54
   6   8   3  272.02   54.05
   6   8   2   32.96   15.72
   6   8   2   27.75   11.63
  -6   8   2   17.88   11.42
  -6  -8  -2   41.12   14.38
   6   8   1   61.50   20.08
   6   8   1   47.57   17.28
  -6   8   1   43.34   17.49
  -6  -8  -1   81.87   19.18
   6   8   0  -11.29   12.40
   6   8   0   -6.47    8.48
  -6   8   0   -4.36   12.40
  -6   8   0   -7.59    8.94
  -6  -8   0  -13.30   10.89
   6   8  -1   76.89   18.72
   6   8  -1   36.86   14.12
  -6   8  -1   44.47   17.61
  -6   8  -1   28.29   15.11
  -6  -8   1   56.01   15.88
   6   8  -2   -5.76    7.64
  -6   8  -2   13.09   11.47
  -6   8  -2   -3.82    8.99
  -6  -8   2   13.06    9.54
   6  -8   2    2.01    7.49
  -6   8  -3   -7.00   11.39
   6   8  -3    4.09    7.62
  -6   8  -3   -8.57    9.69
  -6  -8   3   16.12    9.47
   6  -8   3    5.82    8.07
  -6   8  -4   22.82   13.22
  -6   8  -4    9.01   10.67
  -6  -8   4   12.92    9.69
  -6   8  -5   23.82   13.97
  -6   8  -5   16.43   12.12
  -6  -8   5   33.76   11.41
  -6   8  -6    6.21   13.06
  -6   8  -6   20.01   11.60
  -6   8  -7   73.29   20.79
  -6   8  -7   45.08   19.30
  -6   8  -8   33.34   17.12
  -6   8  -8   46.88   16.61
   6   8  -9  138.37   39.42
  -6   8  -9  157.18   39.15
  -6   8  -9  118.70   38.34
  -6   8 -10   42.18   16.49
   6   8 -10   23.23   17.58
  -6   8 -10   15.77   15.36
  -6   8 -11   64.83   20.92
  -6   8 -11   48.15   20.73
   6   8 -11   51.20   22.20
  -6   8 -12   13.86   14.69
  -6   8 -12    6.54   14.00
   6   8 -12   13.50   16.73
   7   8  10  104.45   26.19
  -7   8  10   21.67   22.95
  -7  -8 -10   91.96   25.85
   7   8   9   -4.35   15.21
  -7   8   9    1.02   13.72
  -7  -8  -9   -7.59   15.58
   7   8   8   24.49   16.61
  -7   8   8  -12.20   14.83
  -7  -8  -8   40.82   16.37
   7   8   7   21.95   16.24
  -7   8   7   17.17   14.65
  -7  -8  -7   26.25   15.43
   7   8   6   27.78   15.92
  -7  -8  -6   21.41   14.73
   7   8   5   14.21   14.44
  -7   8   5    3.00   13.50
  -7  -8  -5  -33.75   14.19
   7   8   4   33.14   15.16
  -7   8   4    7.96   13.36
  -7  -8  -4   -4.51   13.41
   7   8   3  -11.95   14.27
  -7   8   3    3.97   13.54
  -7  -8  -3   10.39   13.06
   7   8   2   23.77   15.89
  -7   8   2   19.80   15.18
  -7  -8  -2   24.08   14.76
  -7  -8  -1    7.15   12.57
  -7  -8   0  146.49   40.13
  -7   8  -1   -7.93   13.88
  -7  -8   1   -7.95   11.80
  -7  -8   2  203.74   49.82
  -7   8  -2  164.99   50.77
  -7   8  -3    2.00   13.10
  -7  -8   3   -3.89   10.88
  -7  -8   4  221.29   50.75
  -7   8  -4  179.09   50.60
  -7   8  -4  164.47   52.08
   7   8  -5   -2.08   14.84
  -7   8  -5  -14.12   14.04
  -7   8  -5    2.50   11.03
   7   8  -6  105.61   38.58
  -7   8  -6  157.37   38.82
  -7   8  -6  134.24   37.05
   7   8  -7  -16.15   15.48
  -7   8  -7   16.11   11.64
  -7   8  -8   24.49   14.77
   7   8  -8   30.81   17.77
  -7   8  -8   35.07   17.17
  -7   8  -9   -2.08   14.78
  -7   8  -9   -2.36   12.75
   7   8  -9   -6.76   14.23
  -8   8   4   -4.44   15.24
  -8  -8  -4   11.06   14.94
  -8   8   3   65.45   31.25
  -8  -8  -3  136.71   31.48
  -8   8   2   -5.55   15.21
  -8  -8  -2   12.13   14.00
  -8   8   1   72.24   30.39
  -8  -8  -1  121.93   30.14
  -8  -8   0    0.86   13.20
  -8  -8   1   36.19   16.56
   8   8  -2  -25.82   16.27
  -8  -8   2    2.35   12.71
  -8   8  -2  -20.19   16.44
   8   8  -3    2.26   15.33
  -8   8  -3    1.13   14.94
   0  -9 -18   65.77   23.72
   0   9  18   76.61   25.52
   0  -9 -17   18.60   12.50
   0   9  17   -7.41   15.99
   0  -9 -16   19.85   16.47
   0   9  16   66.51   19.57
   0  -9 -15   11.85   11.62
   0   9  15    0.96   13.95
   0  -9 -14   -4.39   10.98
   0   9  14    6.39   12.86
   0  -9 -13   -4.22   11.22
   0   9  13    8.68   12.93
   0  -9 -12   42.98   14.44
   0   9  12   22.30   15.45
   0  -9 -11   -7.78   10.10
   0   9  11   -3.14   11.75
   0   9  11    1.53    7.44
   0  -9 -10   40.28   16.40
   0   9  10   68.87   17.78
   0   9  10   41.72   14.65
   0  -9  -9    9.29    9.71
   0   9   9   -5.12    6.70
   0   9   8  118.47   31.18
   0   9   7    0.27    5.68
   0  -9  -6  291.55   82.62
   0   9   6  335.95   81.92
   0   9   5   -3.45    5.21
   0  -9  -5   -8.34    7.98
   0  -9  -4  411.36  103.19
   0   9   4  397.04  102.44
   0   9   3   -5.51    5.22
   0   9   3    2.97    7.23
   0  -9  -3   -9.74    7.75
   0   9   2  131.79   35.23
   0  -9  -2  143.25   36.11
   0   9   2  153.81   35.97
   0  -9  -2  126.84   35.19
   0  -9  -1   -8.34    5.46
   0   9   1   -6.77    5.49
   0   9   1    4.97    6.76
   0  -9  -1    1.96    7.21
   0  -9   0   35.22   13.01
   0   9   0   58.82   13.38
   0   9   0   42.23   13.75
   0  -9   0   39.56   14.11
   0  -9   1   -5.39    5.80
   0   9  -1   -2.01    5.77
   0  -9   1    7.94    6.49
   0   9  -1    0.82    6.08
   0   9  -1    2.26    7.93
   0  -9   2   14.22   10.69
   0  -9   2   29.40   10.64
   0   9  -2   39.69   10.91
   0   9  -2   35.88   10.99
   0   9  -2   49.36   12.53
   0  -9   3   -8.67    6.65
   0   9  -3    9.27    6.73
   0  -9   3   11.86    6.74
   0   9  -3   -2.96    6.19
   0   9  -3   -3.52    8.28
   0  -9   4   -0.41    6.81
   0   9  -4   14.91    6.55
   0   9  -4   -2.10    6.08
   0   9  -4   -1.21    8.42
   0  -9   5   -2.67    7.22
   0   9  -5   -7.36    6.60
   0   9  -5    0.33    5.61
   0   9  -5   -8.11    9.10
   0  -9   6   89.55   25.57
   0   9  -6  103.90   25.03
   0   9  -6   73.68   24.72
   0   9  -6  102.33   26.46
   0   9  -7   -3.96    5.93
   0   9  -7   -0.29    5.43
   0   9  -7   -6.08    9.86
   0   9  -8   95.63   24.61
   0   9  -8   69.78   24.43
   0   9  -8  126.34   27.01
   0   9  -9    2.80    5.57
   0   9  -9   -5.92   10.61
   0   9 -10  241.20   68.54
   0   9 -10  367.79   70.73
   0   9 -11   -6.52   11.82
   0   9 -12  311.09   81.35
   0   9 -13   -1.80   12.76
   0   9 -14   29.36   15.45
   0   9 -15   -5.97   13.96
   0   9 -16   35.54   17.98
   0   9 -17   -2.19   14.97
  -1  -9 -18  -32.30   15.96
  -1   9  18    2.18   16.10
   1  -9 -18   -8.97   13.86
  -1  -9 -17    1.01   13.58
  -1   9  17   18.68   16.34
   1  -9 -17   29.94   14.18
  -1   9  16  -19.78   15.27
   1  -9 -16   -7.48   12.77
  -1  -9 -16   -2.91   12.74
  -1   9  15  113.90   24.56
   1  -9 -15   32.51   22.31
  -1  -9 -15   70.13   22.85
  -1   9  14    2.69   14.53
   1  -9 -14   40.97   13.52
  -1  -9 -14   15.29   13.11
  -1   9  13  140.66   32.34
   1  -9 -13   95.82   31.06
  -1  -9 -13   94.16   31.40
  -1   9  12   15.42   13.00
   1  -9 -12   -0.81   11.01
  -1  -9 -12   13.26   10.97
   1   9  12    6.19    9.56
   1  -9 -11  187.83   67.44
   1   9  11  340.44   68.60
  -1   9  11  305.20   68.28
  -1  -9 -11  221.46   67.66
  -1   9  11  249.51   66.46
   1   9  11  274.45   67.13
   1   9  10    2.28   11.41
[truncated: 118,456 more chars]
